# Supplementary material for: In Silico Detection of Sequence Variations Modifying Transcriptional Regulation
Source: PLOS journal article supplement (doi:10.1371/journal.pcbi.0040005), 2008-01-15
Supplement: S3 (10.1371/journal.pcbi.0040005.s003) [file journal.pcbi.0040005.s003]

dbSNP_ID	Chromosome_position_in_HG17	Allele_1	Allele_2
rs11080564	chr18:12296884	AAGCAATGGAAACAAACAGCCTAAATAAGGGTGTTGAGGACTCAGGAGAAGGTGGCTGATT	AAGCAATGGAAACAAACAGCCTAAATAAGGTTGTTGAGGACTCAGGAGAAGGTGGCTGATT
rs3737182	chr1:109803313	ACCACGGAAACTGCGGCTCGGCAGGCTGAGGCACCGTCTATTGCTGGGCGGTGGCCCTCTC	ACCACGGAAACTGCGGCTCGGCAGGCTGAGACACCGTCTATTGCTGGGCGGTGGCCCTCTC
rs1006938	chr19:54666198	TCAAGGTACAGGTGATTAAACAACTGCCTGCGAGATCCTGAATTGTTAACAGGTCAGCTCC	TCAAGGTACAGGTGATTAAACAACTGCCTGAGAGATCCTGAATTGTTAACAGGTCAGCTCC
rs638820	chr1:109921948	TAAAAAAAAAAAACTACCAGGACAGACATACACAAATATTATTAACTGAAATAAATGTTCC	TAAAAAAAAAAAACTACCAGGACAGACATATACAAATATTATTAACTGAAATAAATGTTCC
rs4802612	chr19:54681562	TGCAGGATGCCATAGGCTACTATGGAGATAAAACAGAGGCAGTGTGAGGGGCAACTCACCC	TGCAGGATGCCATAGGCTACTATGGAGATAGAACAGAGGCAGTGTGAGGGGCAACTCACCC
rs1879266	chr19:54681872	TGTGTCTGGTCGACTTCACTGTGACCTGGAGAAACCCTTGGCCTTATCTGGGCCTCAGTTT	TGTGTCTGGTCGACTTCACTGTGACCTGGACAAACCCTTGGCCTTATCTGGGCCTCAGTTT
rs2271953	chr19:54682478	TTCTTCCGGTTGGACCTCCGCGGTCAGCGCTGTGCCCGGCGAGAGATCACGTGGGGCGCGG	TTCTTCCGGTTGGACCTCCGCGGTCAGCGCGGTGCCCGGCGAGAGATCACGTGGGGCGCGG
rs2271952	chr19:54682605	GGCGGCAGAAGTGACGCAACGCGGTTGCGCGGACGGCTTCCTGTGTTTTCATTGGTCGAAG	GGCGGCAGAAGTGACGCAACGCGGTTGCGCAGACGGCTTCCTGTGTTTTCATTGGTCGAAG
rs1858742	chr19:54687705	CAAATGATAAGCACTAGAATAACAGATAACGCTAGGCTTTATGCACTAAGAGAACCCATTA	CAAATGATAAGCACTAGAATAACAGATAACACTAGGCTTTATGCACTAAGAGAACCCATTA
rs877869	chr12:50678467	GCGACAGGCTGGCGCAGTGGGCATGGTCTACAGTGAAGTTTAATAGAGTAAAACTATAAGG	GCGACAGGCTGGCGCAGTGGGCATGGTCTATAGTGAAGTTTAATAGAGTAAAACTATAAGG
rs12830373	chr12:50682811	CCCTAAGAACTGCCATTTTCTCTCTTCACTATATGCACCTGTTCTGAAATGAGGCCGGGTA	CCCTAAGAACTGCCATTTTCTCTCTTCACTGTATGCACCTGTTCTGAAATGAGGCCGGGTA
rs1057261	chr19:17970314	ACAGTGGCGCCTCTTGGAGTTCAAGAAGCCAACGCTGAGTCAGGCTGAGTGGACTGAGGCC	ACAGTGGCGCCTCTTGGAGTTCAAGAAGCCGACGCTGAGTCAGGCTGAGTGGACTGAGGCC
rs839993	chr1:43472213	CTCTATAATGGAAATAACAAGACTATTGTGCGGATTGTCTAAGTGAATGGATATAAAGTGC	CTCTATAATGGAAATAACAAGACTATTGTGAGGATTGTCTAAGTGAATGGATATAAAGTGC
rs11878563	chr19:6621910	TTTTGATGTGACAAGTGCAGTGAAAAACACAAGAGTGGAATAAAGGAGTGGATGTGTGCTC	TTTTGATGTGACAAGTGCAGTGAAAAACACGAGAGTGGAATAAAGGAGTGGATGTGTGCTC
rs1940171	chr11:124138850	AGTGGCTTTGAGAAATGCCTATGCAAACACAAAACTGCTCATGCAAACCCTAGAATCTAGT	AGTGGCTTTGAGAAATGCCTATGCAAACACGAAACTGCTCATGCAAACCCTAGAATCTAGT
rs3802902	chr11:124140245	GGCTGAGGCAGTCTTGACCATCTTTTAGCCATAATCCCATAGTATTCATTGCTAAATGCTG	GGCTGAGGCAGTCTTGACCATCTTTTAGCCGTAATCCCATAGTATTCATTGCTAAATGCTG
rs3802901	chr11:124140354	AATGTTTTGAGTGTAGCACCTGTTCTCCCCAGGCAGCATCTATAGTCAGAGGCCTGAGGAA	AATGTTTTGAGTGTAGCACCTGTTCTCCCCGGGCAGCATCTATAGTCAGAGGCCTGAGGAA
rs4635400	chr18:13709510	AAATCTAACCACCCACCTCCACTTCTCCGGGAGGATCCCTTCCTAATGTCTGATGCCTCTT	AAATCTAACCACCCACCTCCACTTCTCCGGAAGGATCCCTTCCTAATGTCTGATGCCTCTT
rs1941749	chr18:13712308	GATCACATAGCCCCTGCCATCCTAGATCCAACCATCCCTGCTGCAGCTAAGGACCCCCAGT	GATCACATAGCCCCTGCCATCCTAGATCCAGCCATCCCTGCTGCAGCTAAGGACCCCCAGT
rs1941750	chr18:13712465	AGGTAACTACCTCAAGGGAGGTCATTACAGGTTCTTCAGGCAAAGCAGAGTTAACCTCCTC	AGGTAACTACCTCAAGGGAGGTCATTACAGATTCTTCAGGCAAAGCAGAGTTAACCTCCTC
rs3809898	chr18:13715674	CATAGTTGAGGACTTTCAACCTGAGATCAGGGTCAAAACTACCTGTGGATAGATTATTGAA	CATAGTTGAGGACTTTCAACCTGAGATCAGTGTCAAAACTACCTGTGGATAGATTATTGAA
rs3809897	chr18:13715825	CTCTTCTTGACAAATACCTAAGGATGCATTAGTCTGCGTTGGCTGAACTTGGCATGGTGTG	CTCTTCTTGACAAATACCTAAGGATGCATTGGTCTGCGTTGGCTGAACTTGGCATGGTGTG
rs4393641	chr18:13716081	CAGCAAAGGAGGCTGAAAAACAGTCCCAAAGCAAGATTTGCCAGGACACTGGCTCGACCCG	CAGCAAAGGAGGCTGAAAAACAGTCCCAAAACAAGATTTGCCAGGACACTGGCTCGACCCG
rs4141739	chr1:43511722	GAGAGCACTTATGGCAAAGTGGCAAGAGTCGTAGAGTATGCCATGACAAAACAAAGTCTGA	GAGAGCACTTATGGCAAAGTGGCAAGAGTCATAGAGTATGCCATGACAAAACAAAGTCTGA
rs4141740	chr1:43511920	ATTCATCACAACTGCACAGAGAAAGCTATGTGTGGTGAAGGGCCTCCTTTAGGGACTGACT	ATTCATCACAACTGCACAGAGAAAGCTATGAGTGGTGAAGGGCCTCCTTTAGGGACTGACT
rs4141741	chr1:43512093	TCAAAAGAACACAATTTCTTAATGAAAGAACGTAGGCAACAACTAGGTGGGAGAAATACAA	TCAAAAGAACACAATTTCTTAATGAAAGAATGTAGGCAACAACTAGGTGGGAGAAATACAA
rs4793014	chr17:39102373	GTTCAACAATTACTCTACAGACCAATTGCCCGCAACTATATACTTGGCAGTGAGGAACTGC	GTTCAACAATTACTCTACAGACCAATTGCCTGCAACTATATACTTGGCAGTGAGGAACTGC
rs1398882	chr17:39103977	TGTAAATGTCATGTCTATGCAAATGAGAGATGCTCAGGAAGCACTTGAGAACTGCATGGTG	TGTAAATGTCATGTCTATGCAAATGAGAGACGCTCAGGAAGCACTTGAGAACTGCATGGTG
rs2736426	chr6:31853263	TAAAATATTTTCCCACAAAATCCTCTTGTCGTCTGTGGTGGGGGCAGAGAGGGGAGCAGAG	TAAAATATTTTCCCACAAAATCCTCTTGTCATCTGTGGTGGGGGCAGAGAGGGGAGCAGAG
rs17160397	chr7:31492062	CTTCCAGGCCAGGGTATTCTGGACAGATGGGAGAAGAAAGCCAAAACTCTGCACAGAGACC	CTTCCAGGCCAGGGTATTCTGGACAGATGGAAGAAGAAAGCCAAAACTCTGCACAGAGACC
rs10270346	chr7:31492340	GTCCTAAAACTTTAAAAGATTTTTTCCACATCATAAAAACCTTAGTCAACACTTTTCCTTA	GTCCTAAAACTTTAAAAGATTTTTTCCACAACATAAAAACCTTAGTCAACACTTTTCCTTA
rs1544573	chr7:31493296	GTGGAAGAAAGAATACTGACTCGGAGAAGAGGGACCTTTATTCTAGTCACTCCCTTGCTCT	GTGGAAGAAAGAATACTGACTCGGAGAAGAAGGACCTTTATTCTAGTCACTCCCTTGCTCT
rs34146	chr7:31496388	ATGTGTTCAAAACTGCCCAGAGCAAAGACACAGTGCTCACTTACCAGGGGATATTGATCTG	ATGTGTTCAAAACTGCCCAGAGCAAAGACATAGTGCTCACTTACCAGGGGATATTGATCTG
rs34147	chr7:31496400	CTGCCCAGAGCAAAGACACAGTGCTCACTTACCAGGGGATATTGATCTGAGACAGCTCACT	CTGCCCAGAGCAAAGACACAGTGCTCACTTGCCAGGGGATATTGATCTGAGACAGCTCACT
rs34158	chr7:31499705	GAGAAGCAGCAATAGTGATTGAAAGTACTCTGGATTTAAACTTAAATAGCTTTGAGAGTCG	GAGAAGCAGCAATAGTGATTGAAAGTACTCCGGATTTAAACTTAAATAGCTTTGAGAGTCG
rs11936140	chr4:1832612	CAGAGGTAGTGTTCATGGGGCTATGGGGGAGGAAGGAGGGCTCTAGAGGAAGTTGTCCCTC	CAGAGGTAGTGTTCATGGGGCTATGGGGGATGAAGGAGGGCTCTAGAGGAAGTTGTCCCTC
rs11204306	chr17:19207964	CCAGTTAAAGTGCTTTCTCCCACACATTCTATCAGTCTCACCCAATTATTTCCTCCCTTTG	CCAGTTAAAGTGCTTTCTCCCACACATTCTGTCAGTCTCACCCAATTATTTCCTCCCTTTG
rs352684	chr1:157494848	TATCTAAGAGCATCACGGAAACTGAGAACAATTTTGTTTGAAGGTACATGAGTGCTTTTTT	TATCTAAGAGCATCACGGAAACTGAGAACAGTTTTGTTTGAAGGTACATGAGTGCTTTTTT
rs352685	chr1:157494909	ATTCTTTTCTGAGTACTGGCCCCCCTGAGAGTACAGTAGAAGCTATGAATCTTCCCCCTAC	ATTCTTTTCTGAGTACTGGCCCCCCTGAGACTACAGTAGAAGCTATGAATCTTCCCCCTAC
rs2070931	chr1:157494936	AGCAGACATTCTCTATCAGGGTCCCTTATTCTTTTCTGAGTACTGGCCCCCCTGAGAGTAC	AGCAGACATTCTCTATCAGGGTCCCTTATTATTTTCTGAGTACTGGCCCCCCTGAGAGTAC
rs352692	chr1:157499567	TTAAGCAGGGCCTTGAATGCCACAACAGGCACAGCTTTGCTAGTGCCTGGAGAGTGAGAGA	TTAAGCAGGGCCTTGAATGCCACAACAGGCGCAGCTTTGCTAGTGCCTGGAGAGTGAGAGA
rs352694	chr1:157500872	ATTGCCAGGACAGATACTAATGGGAACCTCAGCTCTGCCAATTCCTTATGACTTATCATAT	ATTGCCAGGACAGATACTAATGGGAACCTCGGCTCTGCCAATTCCTTATGACTTATCATAT
rs851054	chr17:39192149	TGGCTGGGTCTATGGGGGTCAAACAGAAACGCCTTGGGCCATTTGTTGGTGGGGTGACAAA	TGGCTGGGTCTATGGGGGTCAAACAGAAACACCTTGGGCCATTTGTTGGTGGGGTGACAAA
rs851056	chr17:39192708	ATGTGTTCCATGAAGCCATCCCAGGACCAAGTGGTCACAAAGAAGCTAAGAGAAAATGCTG	ATGTGTTCCATGAAGCCATCCCAGGACCAACTGGTCACAAAGAAGCTAAGAGAAAATGCTG
rs851057	chr17:39192790	GCCACACAGGGCCGGGGCGGGGGGCGGGGGGGCAGGTAGAGGCGTGGGGGAGAAGGATTCA	GCCACACAGGGCCGGGGCGGGGGGCGGGGGCGCAGGTAGAGGCGTGGGGGAGAAGGATTCA
rs851058	chr17:39193245	CGGTAGTGTTGTGAGAAGCTGGCCCTCCGCGCCACCTCCCCTTGTCTATGACCCTCCAGCC	CGGTAGTGTTGTGAGAAGCTGGCCCTCCGCACCACCTCCCCTTGTCTATGACCCTCCAGCC
rs1234612	chr17:39196328	CAGCTTTTGTTTCTGTCGAGTTGCTTCTTCCGATGTTCACTCGCCAAACGTTTAATAAAGC	CAGCTTTTGTTTCTGTCGAGTTGCTTCTTCTGATGTTCACTCGCCAAACGTTTAATAAAGC
rs1230393	chr17:39198118	CTATGTAGCTGTTAAGATGAAGGGGGTAGAACAATAAAAACAATAACCATAATATAAGCTA	CTATGTAGCTGTTAAGATGAAGGGGGTAGAGCAATAAAAACAATAACCATAATATAAGCTA
rs1230394	chr17:39198260	TCCTTTAAGGATATGATGCTTATGGGGAGACAGATTGAAGGAGCAAGTGACTCACTTTTCC	TCCTTTAAGGATATGATGCTTATGGGGAGATAGATTGAAGGAGCAAGTGACTCACTTTTCC
rs1230396	chr17:39198555	GCCCAGACTTCTGTCTGGGAGGAAAAGGCAACTACTTTCTCTAAGGTTTTTTATTCAAAGG	GCCCAGACTTCTGTCTGGGAGGAAAAGGCACCTACTTTCTCTAAGGTTTTTTATTCAAAGG
rs2869531	chr11:47753978	ATGGTATAATGGAGTGTATGGTGAGAAAGGGAGGAACATGATATTTCAAAGAAAGTACATT	ATGGTATAATGGAGTGTATGGTGAGAAAGGCAGGAACATGATATTTCAAAGAAAGTACATT
rs605203	chr6:31954991	TGTTGGGAGTGTACGGCAGTTAAGGTAGTTGGCGAGATTATAAAGCGTTTTCTTATCAGAG	TGTTGGGAGTGTACGGCAGTTAAGGTAGTTTGCGAGATTATAAAGCGTTTTCTTATCAGAG
rs10783485	chr12:50622274	GCTGAGAAGGAAAGGGAAGTGACCGCCGCTGTGATAGGGTTTGGGATCTGTCTGGGGAAGA	GCTGAGAAGGAAAGGGAAGTGACCGCCGCTTTGATAGGGTTTGGGATCTGTCTGGGGAAGA
rs12721585	chr17:37794757	GTCTTCTGCATTCGCCTGTACGGGCCAATGGGCTAGCTGGTCGGCGTTTGATGCTTGAAGT	GTCTTCTGCATTCGCCTGTACGGGCCAATGTGCTAGCTGGTCGGCGTTTGATGCTTGAAGT
rs4796793	chr17:37795736	GATTTGTTTAGTGATTTACTGCTTACAAAGGACTTACACACCTTATACACTCCCTGCCTGG	GATTTGTTTAGTGATTTACTGCTTACAAAGCACTTACACACCTTATACACTCCCTGCCTGG
rs16981598	chr19:17065327	CAGGTGAGCGATACCATGTGGCACCTGGGAACCTGACGTACCTTTAGATTTCCGACCATCT	CAGGTGAGCGATACCATGTGGCACCTGGGAGCCTGACGTACCTTTAGATTTCCGACCATCT
rs8109466	chr19:17068011	TGTTGAACCATATTCCATGGTGTGGTCAGTGTGTTCATTCGGTGGGTGGACATTTGGGTTC	TGTTGAACCATATTCCATGGTGTGGTCAGTTTGTTCATTCGGTGGGTGGACATTTGGGTTC
rs8011668	chr14:36197592	CTCGCGTTCCGCACAACCTGTAGTGCTTGGGTCTGACTTCGGCAGCCCTCGGGTACAGTCT	CTCGCGTTCCGCACAACCTGTAGTGCTTGGTTCTGACTTCGGCAGCCCTCGGGTACAGTCT
rs2073242	chr14:36199092	CAAGCCTAAGGCAGAGTCATAAGCTCCCCTACGATGCGGCAAAGTCTCAACTAATTTATCT	CAAGCCTAAGGCAGAGTCATAAGCTCCCCTCCGATGCGGCAAAGTCTCAACTAATTTATCT
rs2073243	chr14:36199244	CACCCAACAGGTATTGGAGGTCAGACCAGGCTGAAATTGCTATCAAGTCAAACTTCAAGAA	CACCCAACAGGTATTGGAGGTCAGACCAGGGTGAAATTGCTATCAAGTCAAACTTCAAGAA
rs2073245	chr14:36199681	AACAGAGTTCACGACCCCAAGCAGTACAAACTCCCAAATTCACGAAAATATTTCTCTTCTT	AACAGAGTTCACGACCCCAAGCAGTACAAAGTCCCAAATTCACGAAAATATTTCTCTTCTT
rs2073246	chr14:36199744	TTATTATTTTGATTCACATTCTCCACAACCCTAACTGCAAATATTAATAACTTTGGCTGCA	TTATTATTTTGATTCACATTCTCCACAACCTTAACTGCAAATATTAATAACTTTGGCTGCA
rs2073247	chr14:36200496	TTAACTTCAATTCTGAGATGTCCATCGTTCCCCGGAGGAGGTCTCCTCGGGCCCCTTCTCC	TTAACTTCAATTCTGAGATGTCCATCGTTCTCCGGAGGAGGTCTCCTCGGGCCCCTTCTCC
rs2782651	chr1:43589779	TGGGATGCTTAGACTTTCCTGGGTTTCTGTCTCTGTATAGCCTCTTAATGTTTCTTGAGAT	TGGGATGCTTAGACTTTCCTGGGTTTCTGTGTCTGTATAGCCTCTTAATGTTTCTTGAGAT
rs1334973	chr1:43590477	GTCAGAAACAAAATGTGTCCAACTCCCGATTGTCCACCCCTTTTTTCCTTGGACATGCCTT	GTCAGAAACAAAATGTGTCCAACTCCCGATGGTCCACCCCTTTTTTCCTTGGACATGCCTT
rs2782652	chr1:43595398	CTACAAATAGGGTGCAGCATATACTACTCGTAAATCACCACTAAATAACTTATGTAACCAA	CTACAAATAGGGTGCAGCATATACTACTCGCAAATCACCACTAAATAACTTATGTAACCAA
rs1964952	chr1:43597290	ATTGAGACCATCCTGGCTAACACGGTGAAATCCCGTCTCTACTAAAAATACGAAAAATTAG	ATTGAGACCATCCTGGCTAACACGGTGAAACCCCGTCTCTACTAAAAATACGAAAAATTAG
rs8078195	chr17:2361963	GAAGCCATCTAGCCTCGTGATTGGACACATCCCTCTCGCGCGACCTGTGGCTGATCTTGAA	GAAGCCATCTAGCCTCGTGATTGGACACATACCTCTCGCGCGACCTGTGGCTGATCTTGAA
rs8077337	chr17:2362100	CCTTTGAGGTATGGCAGGAGGAGGACATGCGTTCGAATTCGCGAGAAAACTTATTTAAAAG	CCTTTGAGGTATGGCAGGAGGAGGACATGCATTCGAATTCGCGAGAAAACTTATTTAAAAG
rs12450119	chr17:2367684	CGATTCTATGATCCACATAGCCACAGTCTGCGGCACCACCATGTCAACATGGGCTTCCAGG	CGATTCTATGATCCACATAGCCACAGTCTGTGGCACCACCATGTCAACATGGGCTTCCAGG
rs1333865	chr9:83553150	GTAGCAGCAGAGGCCACTGTCAATACAGGTTGCCTGACTGATCGTCTGACCAAACCGGGCT	GTAGCAGCAGAGGCCACTGTCAATACAGGTCGCCTGACTGATCGTCTGACCAAACCGGGCT
rs1333863	chr9:83553536	GAACAGGGTTGGACGGCTTAGGAGCAGAAAGGCAGAATGTATCTTTGCGGATTTGGGTCAT	GAACAGGGTTGGACGGCTTAGGAGCAGAAACGCAGAATGTATCTTTGCGGATTTGGGTCAT
rs961807	chr9:83554604	GACAGACCATTTAACAAACAAAAACCATTCAGAAGAAAATGCCACAAATAAACATCTAGAC	GACAGACCATTTAACAAACAAAAACCATTCGGAAGAAAATGCCACAAATAAACATCTAGAC
rs1961941	chr9:83555296	TATTTTTTTTGGAGACAGTTTTTTTCTGTCGCCCAGGCTGGAGGGTAATGGCATGATCTCG	TATTTTTTTTGGAGACAGTTTTTTTCTGTCACCCAGGCTGGAGGGTAATGGCATGATCTCG
rs1035274	chr9:83558212	ATCTATTTATGTCACTATACTATAAACTTCAGGAAAGACAAAGGAGTATAAAATATGATCT	ATCTATTTATGTCACTATACTATAAACTTCGGGAAAGACAAAGGAGTATAAAATATGATCT
rs7023082	chr9:83559554	TGTTATCAAGTATCAAAAATGATATTTCACGTCAAAGTCTTTTTAATTCTGAGTCTATTAG	TGTTATCAAGTATCAAAAATGATATTTCACTTCAAAGTCTTTTTAATTCTGAGTCTATTAG
rs805304	chr6:31806067	AAGGGGGGCGCAGTCTGGATGTAATGGGCGAGGCTTAGCAGGGCGGAATGGGCGTGGCCCG	AAGGGGGGCGCAGTCTGGATGTAATGGGCGCGGCTTAGCAGGGCGGAATGGGCGTGGCCCG
rs3212274	chr19:44681202	ATCATGTACAACCTCACACACAGGCTTAGCCCCCTAACCCCACCCCACCCTAGCCACACA	ATCATGTACAACCTCACACACAGGCTTAGCGCCCTAACCCCACCCCACCCTAGCCACACA
rs2269336	chr17:45635355	TGGAGGAAGAAAGGACGTGGAGTTCTAGAGCCATCTTCCTTAGATATAGCCTGCTGTCCTT	TGGAGGAAGAAAGGACGTGGAGTTCTAGAGGCATCTTCCTTAGATATAGCCTGCTGTCCTT
rs1043618	chr6:31891486	TGTTCCGTTTCCAGCCCCCAATCTCAGAGCGGAGCCGACAGAGAGCAGGGAACCGGCATGG	TGTTCCGTTTCCAGCCCCCAATCTCAGAGCCGAGCCGACAGAGAGCAGGGAACCGGCATGG
rs4234538	chr3:16622552	TGCAGGAGTGAACAGAATAACAGAACATGTGTTTGCTCAGGGATCTTACATTTTAATGGGA	TGCAGGAGTGAACAGAATAACAGAACATGTCTTTGCTCAGGGATCTTACATTTTAATGGGA
rs6773997	chr3:16623214	TGGTAGGAGGTAAGGGCTCAGGGTGGGAGCTGGAACTGAGTACTCTGCAAAACGCCATTGT	TGGTAGGAGGTAAGGGCTCAGGGTGGGAGCGGGAACTGAGTACTCTGCAAAACGCCATTGT
rs1987831	chr3:16626767	TCTGTGAGCTAGTTACCCAATAAATTTTAATAAGTTCTTTTCCTGCTTAAACCAGCCAAAA	TCTGTGAGCTAGTTACCCAATAAATTTTAACAAGTTCTTTTCCTGCTTAAACCAGCCAAAA
rs13064112	chr3:16627901	TAGCTAAACAAAGAAGCAAAACCCCAAATAACACTATGGTCTGAATGTTTGCCCTCCTCAC	TAGCTAAACAAAGAAGCAAAACCCCAAATAGCACTATGGTCTGAATGTTTGCCCTCCTCAC
rs2217205	chr3:16629301	TGCTATTTGAACTTATAGAACATATTGATACATAAAATATGTGGTATTTTTATTATACTTG	TGCTATTTGAACTTATAGAACATATTGATATATAAAATATGTGGTATTTTTATTATACTTG
rs2195157	chr3:16629689	GTACCATCACACCCAGTTACTCAGAAATTTCTAATGTCAGCATATAGATCTACCTAATTCC	GTACCATCACACCCAGTTACTCAGAAATTTATAATGTCAGCATATAGATCTACCTAATTCC
rs4685366	chr3:16631335	TGTGTACCTGCAGCTAGCATTTCAGCCAGCATGAGCAAGTACGAGGAAGTGAAAGGACTAA	TGTGTACCTGCAGCTAGCATTTCAGCCAGCGTGAGCAAGTACGAGGAAGTGAAAGGACTAA
rs451643	chr5:176444038	CCCCTCCAGCAGTCCGGGAGGTCTGGCAAGGTACCCTCTGGGCAGGCAGCTCCCAGGGCCA	CCCCTCCAGCAGTCCGGGAGGTCTGGCAAGTTACCCTCTGGGCAGGCAGCTCCCAGGGCCA
rs641101	chr5:176446066	AATGAGGGAGCAGAAGGAAGGGGTTCTCCTATCCGCTGCACGGCACTGCGCAGAAGACAGG	AATGAGGGAGCAGAAGGAAGGGGTTCTCCTGTCCGCTGCACGGCACTGCGCAGAAGACAGG
rs819437	chr7:79868647	AGCTTGGTGTCTCCTGGCAGCCAGGACCACGAAGGAACTGCTTTGTGTTTCAAAGCTCTCA	AGCTTGGTGTCTCCTGGCAGCCAGGACCACAAAGGAACTGCTTTGTGTTTCAAAGCTCTCA
rs7789369	chr7:79870798	AGAACCATAGTACTTAATCCTTCCATGTTTTGCTCTAAGAAAGAGGATGGAGCTATAGTTC	AGAACCATAGTACTTAATCCTTCCATGTTTGGCTCTAAGAAAGAGGATGGAGCTATAGTTC
rs7807607	chr7:79871536	ATCCAAAGAATGAGTGTTCATGGTAGGATACAGAATGATTTCTAGAATAGCTCCCATTTAA	ATCCAAAGAATGAGTGTTCATGGTAGGATATAGAATGATTTCTAGAATAGCTCCCATTTAA
rs10499857	chr7:79872488	CTTTTTTCCCTTCACTAAACAATAATATACTTGAGAGCACAAATTTTGGCTCTTTACCACT	CTTTTTTCCCTTCACTAAACAATAATATACCTGAGAGCACAAATTTTGGCTCTTTACCACT
rs11771839	chr7:79873872	GATGAGCTTAATTACTTGTTTTGAGAAAAAGATGTTCACACAGAAATGGGAAATTCTATGA	GATGAGCTTAATTACTTGTTTTGAGAAAAATATGTTCACACAGAAATGGGAAATTCTATGA
rs1524596	chr7:79873964	CCTAACTTTAAGCCATTAAAGTTGAACCAACAATCCTGTTGCTAATAGTAGCTGTTTCCAG	CCTAACTTTAAGCCATTAAAGTTGAACCAAGAATCCTGTTGCTAATAGTAGCTGTTTCCAG
rs17154130	chr7:79874135	AAATGGAGGGAGTCAATGGTCTTGTCTCAGTGATTTACCACAGAGCCATCGTGCTTTTTAG	AAATGGAGGGAGTCAATGGTCTTGTCTCAGCGATTTACCACAGAGCCATCGTGCTTTTTAG
rs1194182	chr7:79876155	TTAGGCATGCGTCCGAAGAGCTGGAAGGCTGAGGATGTCAATGGCTTTCAGATGTCAGGAT	TTAGGCATGCGTCCGAAGAGCTGGAAGGCTCAGGATGTCAATGGCTTTCAGATGTCAGGAT
rs6125822	chr20:47982173	ACTTGGGAGGCTGGGGTGGGAGGACGGCTTTTGCCCATGAGGTGGAGGTTGCAGTGAGCCA	ACTTGGGAGGCTGGGGTGGGAGGACGGCTTGTGCCCATGAGGTGGAGGTTGCAGTGAGCCA
rs199144	chr17:45479347	CCAAGACCTTGGCCTTCTCCCTGTGGAGGACCCCTTACCCACCTTGTCATGGACGTCAGGG	CCAAGACCTTGGCCTTCTCCCTGTGGAGGAACCCTTACCCACCTTGTCATGGACGTCAGGG
rs16948609	chr17:45479581	ACCTTAATAGTTGCTTGACTCATTTGTACCTCGGGGCCAGAGTCTCTGTAGGCAATGCCGT	ACCTTAATAGTTGCTTGACTCATTTGTACCGCGGGGCCAGAGTCTCTGTAGGCAATGCCGT
rs199143	chr17:45482264	GAATCCAAGTTCCTGATTGGAAGTTCCTCAGGCACCAGCACTTGGGGCACCCGAGTGCTCT	GAATCCAAGTTCCTGATTGGAAGTTCCTCAAGCACCAGCACTTGGGGCACCCGAGTGCTCT
rs199141	chr17:45483225	ACATATTATGTGTGCAGCCTTTTACGTGTGTTACTTTCTAATAACCCTAGGAGGCGTAGAT	ACATATTATGTGTGCAGCCTTTTACGTGTGCTACTTTCTAATAACCCTAGGAGGCGTAGAT
rs4794094	chr17:45487642	GCTTGGGTGGGAAGAGGGAGCCTCTGGGATTCTGCTGGGCTGGGCCCTGAAGGCAGGAGTG	GCTTGGGTGGGAAGAGGGAGCCTCTGGGATCCTGCTGGGCTGGGCCCTGAAGGCAGGAGTG
rs4793633	chr17:45487712	TGGATACGGTCTAGGCTCAGCTTCCCGGCTACGCAGTGCGTTCTGTGAAGGACGGACTCAT	TGGATACGGTCTAGGCTCAGCTTCCCGGCTGCGCAGTGCGTTCTGTGAAGGACGGACTCAT
rs4793634	chr17:45487726	GCTCAGCTTCCCGGCTACGCAGTGCGTTCTGTGAAGGACGGACTCATTTCTACATTGACAG	GCTCAGCTTCCCGGCTACGCAGTGCGTTCTATGAAGGACGGACTCATTTCTACATTGACAG
rs16970080	chr17:45488462	CCTCCCTCCTGTCCTCCTTGCGGTCGACCGGTGCGCTTGCCAGATCCGCCGCGAAGCCGGG	CCTCCCTCCTGTCCTCCTTGCGGTCGACCGCTGCGCTTGCCAGATCCGCCGCGAAGCCGGG
rs2820421	chr1:157069077	CCAAGGTACCAGAGGCTCTCTTAATAACATGGAGTTCTAAGTTCCTGGCCGGCCCTGTGTC	CCAAGGTACCAGAGGCTCTCTTAATAACATTGAGTTCTAAGTTCCTGGCCGGCCCTGTGTC
rs2795069	chr1:157069478	ATACAAGGTAAGAATTTTAAATGAAAAAAAATCCTGTGTTAAGTCACCTCATCACTTTCAT	ATACAAGGTAAGAATTTTAAATGAAAAAAAGTCCTGTGTTAAGTCACCTCATCACTTTCAT
rs7523769	chr1:157071053	CAATGGCACAATCTCATTAGTAGTATGTACTCTGTTGAGAAGGCAGCCTTAGTTTAGGGAT	CAATGGCACAATCTCATTAGTAGTATGTACACTGTTGAGAAGGCAGCCTTAGTTTAGGGAT
rs16831744	chr1:157071471	AGCTTTTTATATTTACTGATTTTTCAACTATATGCATTTATTATTTATTGAAAACATGAAT	AGCTTTTTATATTTACTGATTTTTCAACTACATGCATTTATTATTTATTGAAAACATGAAT
rs3026943	chr1:155944999	CTCACTCACCTACTGGACCTGTCCTGAACAAAACTATTTAAGTGAAAAGGATCAGAGAAAA	CTCACTCACCTACTGGACCTGTCCTGAACACAACTATTTAAGTGAAAAGGATCAGAGAAAA
rs2814775	chr1:155947727	CCTAGCTTTTAAAAATATATAGAATAAAACATTCAGCGGGTGGTCTTACCCTTATTCCCAA	CCTAGCTTTTAAAAATATATAGAATAAAACGTTCAGCGGGTGGTCTTACCCTTATTCCCAA
rs2814774	chr1:155948426	TGTAAAGTAATAGTAAATGACTTATAAGCTAACTTATTTGTTGGTTCTTAAGGCAGTTACC	TGTAAAGTAATAGTAAATGACTTATAAGCTGACTTATTTGTTGGTTCTTAAGGCAGTTACC
rs926634	chr1:155953924	GTTGATAGGGGGACCCCAGGGCTTAAGGCCAGGGGCCACAAATTGTTGCTGGACAGATAAC	GTTGATAGGGGGACCCCAGGGCTTAAGGCCGGGGGCCACAAATTGTTGCTGGACAGATAAC
rs1032071	chr17:37828899	GGCCCCACCCCAGAAAGGGAGGGACCGGGGCAGAAGGGGAGATCGACGAGGCGGGGCGGCG	GGCCCCACCCCAGAAAGGGAGGGACCGGGGTAGAAGGGGAGATCGACGAGGCGGGGCGGCG
rs1032072	chr17:37829214	ACCTAGATTTTGAGCACAAAAGGACCCTTGCCCTTTACAATATTTTCTAAGAGGCCTCTCG	ACCTAGATTTTGAGCACAAAAGGACCCTTGTCCTTTACAATATTTTCTAAGAGGCCTCTCG
rs3812080	chr5:177482097	CAGGGCACACCCTCCCACTGACCACTGGCCATGGGAGGAGCTACTGCCCAGGTCAACAGCC	CAGGGCACACCCTCCCACTGACCACTGGCCGTGGGAGGAGCTACTGCCCAGGTCAACAGCC
rs3812079	chr5:177483082	GCACGGCCAGGGTAGCCAAAGGGAGTGAGGTGGGGCTCTCTGCAGATAACTTCTCAGAAGT	GCACGGCCAGGGTAGCCAAAGGGAGTGAGGGGGGGCTCTCTGCAGATAACTTCTCAGAAGT
rs3812073	chr5:177484591	CCACATCCCACCAGTGCCTTCTGGAGCTGTGGTGAAGACACCACCCTACCCCGGCAATGCC	CCACATCCCACCAGTGCCTTCTGGAGCTGTAGTGAAGACACCACCCTACCCCGGCAATGCC
rs4637566	chr5:177487089	TTCAATCAACTCTCCACCCCTATGGCTTCCGTTTGGGCCAGGGCCACCCAGGCTCCTCATG	TTCAATCAACTCTCCACCCCTATGGCTTCCCTTTGGGCCAGGGCCACCCAGGCTCCTCATG
rs3888282	chr8:22146208	AGATGCCCAGGGCCGGCTTCCTTTGTGCTCAGAGAGTGGGGTGGGCTGAGGACACTCAGAG	AGATGCCCAGGGCCGGCTTCCTTTGTGCTCCGAGAGTGGGGTGGGCTGAGGACACTCAGAG
rs7710186	chr5:177522401	GAACGCTGCTCCCGGCTGTGAGGATGGAGGCACCATGTGTGAGGACCAAAAAGTAACCGCA	GAACGCTGCTCCCGGCTGTGAGGATGGAGGGACCATGTGTGAGGACCAAAAAGTAACCGCA
rs11079884	chr17:45431434	CCCTTCAGGGGGCAGGAGGATATCTGAAATAAGAAGTGAAGGATGTGTGGGACTTGGCTTG	CCCTTCAGGGGGCAGGAGGATATCTGAAATGAGAAGTGAAGGATGTGTGGGACTTGGCTTG
rs1891092	chr1:202517142	GGAAGACATCCTGGCCCTTCTCTACTGAAAGAGCAGAAATAGCTACAGTCTGTGAAATGAT	GGAAGACATCCTGGCCCTTCTCTACTGAAATAGCAGAAATAGCTACAGTCTGTGAAATGAT
rs1891093	chr1:202517295	AGTTGGGGGTATCAAAAAGATAGTGAGGGTCTCTGAGCATCACTGTGGACCTTTGTATGAC	AGTTGGGGGTATCAAAAAGATAGTGAGGGTGTCTGAGCATCACTGTGGACCTTTGTATGAC
rs823081	chr1:202520651	ATATTTTAAAATTTATATTAATTTTGAAATACCTTATATTTTAAAATTTCTGTGATGTTTG	ATATTTTAAAATTTATATTAATTTTGAAATTCCTTATATTTTAAAATTTCTGTGATGTTTG
rs5955619	chrX:18137779	CTACCCACACCTCTGTAAATAACCCAGTAAATTCAAAATCACTTATAACTACATCTTCTGT	CTACCCACACCTCTGTAAATAACCCAGTAAGTTCAAAATCACTTATAACTACATCTTCTGT
rs12753283	chr1:156927143	CTTACAACCTATGCCAGGATTTCAGAATAACGGTCAGAAGTCAATTCTTGCCCAAGCCATA	CTTACAACCTATGCCAGGATTTCAGAATAAAGGTCAGAAGTCAATTCTTGCCCAAGCCATA
rs11585375	chr1:156927416	TCACTTCATTCAGATCACTCCTTAAACATCAGTAAGATCCTCACAGAGGACCTCAAATAAA	TCACTTCATTCAGATCACTCCTTAAACATCGGTAAGATCCTCACAGAGGACCTCAAATAAA
rs16831438	chr1:156930215	AGCAACAGCATCAATAACAAAAAAAATCCTAGAAGCAATAAATTCAAAGTTACAGGGTATA	AGCAACAGCATCAATAACAAAAAAAATCCTGGAAGCAATAAATTCAAAGTTACAGGGTATA
rs16831441	chr1:156933408	TATCACATGGAAAAGCATATTTTTACCCTCACTGAGAAGAGCTGCATATTAATCCACAAAT	TATCACATGGAAAAGCATATTTTTACCCTCGCTGAGAAGAGCTGCATATTAATCCACAAAT
rs12743096	chr1:156933729	TGTTAGTGGAAAAGTGTGCCTTGCTAAAAAACACACACAGAGTACCTGCTTTTTTTTTTTT	TGTTAGTGGAAAAGTGTGCCTTGCTAAAAAGCACACACAGAGTACCTGCTTTTTTTTTTTT
rs2261317	chr1:11059245	GACATCGAAGGACAAAGAACAGTCACTGCCTAAAAATGGCAGTCTCTGCTATAAAAAATTG	GACATCGAAGGACAAAGAACAGTCACTGCCCAAAAATGGCAGTCTCTGCTATAAAAAATTG
rs2486920	chr1:11059316	ATATCATTATTTCAGTCATCCGTGTGTCCAACTAAAAGCCCAGGGTTCTACTATAGAATTT	ATATCATTATTTCAGTCATCCGTGTGTCCAGCTAAAAGCCCAGGGTTCTACTATAGAATTT
rs255125	chr7:30516251	AGATTGAGCATGGCATTCCAAGATGGAGACAGTGTAGAAGGGCTAGGAGCTGGGCTCTAGA	AGATTGAGCATGGCATTCCAAGATGGAGACGGTGTAGAAGGGCTAGGAGCTGGGCTCTAGA
rs255126	chr7:30517950	GTCTAAGGAAAGCCGGCACCTGTCGAGAAACGGACCTCTGCCCTGCATTTGGGGCCACCAC	GTCTAAGGAAAGCCGGCACCTGTCGAGAAAGGGACCTCTGCCCTGCATTTGGGGCCACCAC
rs10848706	chr12:2789962	CAGAAATATGAACTTGTAACACAGTTCAGCTTCAGAATATATCTGCAGTCTCCAGTATTTG	CAGAAATATGAACTTGTAACACAGTTCAGCCTCAGAATATATCTGCAGTCTCCAGTATTTG
rs10774066	chr12:2790997	ACAGCCCCTGGTCCAAAATCCCAGATAAGGTAGAATCATTTTTTTTTTTTTTTTGAAACAC	ACAGCCCCTGGTCCAAAATCCCAGATAAGGCAGAATCATTTTTTTTTTTTTTTTGAAACAC
rs4645485	chr7:30558066	AGGATTTCATTTTTGGTCACAGTGCTGAGTCGAAGGCGTAGTAGGTCAGTAAGTAGTCCCG	AGGATTTCATTTTTGGTCACAGTGCTGAGTTGAAGGCGTAGTAGGTCAGTAAGTAGTCCCG
rs1468589	chr7:30558728	GTCCTGGCTGGGCATGGTGGCTCATGCCTGCAATCCCAGCACTTTTGGAGGCTGAGGTGGG	GTCCTGGCTGGGCATGGTGGCTCATGCCTGTAATCCCAGCACTTTTGGAGGCTGAGGTGGG
rs6966354	chr7:30561038	GGTGGGTTAAAATGATTGGTGACATTGAGGGTCTTATATTTGTCCCAGCATTTCTCATGTC	GGTGGGTTAAAATGATTGGTGACATTGAGGTTCTTATATTTGTCCCAGCATTTCTCATGTC
rs741872	chr7:30564218	GTCTTCTCTTTGAAATGGGACTGGGTTGTAAAATCTCCCACAGACAGAAAAAAGCTCAGTC	GTCTTCTCTTTGAAATGGGACTGGGTTGTAGAATCTCCCACAGACAGAAAAAAGCTCAGTC
rs887443	chr7:30564668	CATAGGTCTGACACCTACTTGGAGGCCACAGAGCAGCATGTGGCTGCCAGGGCTGAGAGTT	CATAGGTCTGACACCTACTTGGAGGCCACACAGCAGCATGTGGCTGCCAGGGCTGAGAGTT
rs12070422	chr1:156970438	TTTCTCTGGTGTAGCCTTGAGATAGAGGCTGTAACAAGACTTTCTGAATCCCTGTGGCCTT	TTTCTCTGGTGTAGCCTTGAGATAGAGGCTATAACAAGACTTTCTGAATCCCTGTGGCCTT
rs11265352	chr1:156972163	ACTTTGATCTGACCCTCTATGGTCTCCCTCATGCCTCAGTTTACCTGTGCATAGTAAGAAC	ACTTTGATCTGACCCTCTATGGTCTCCCTCGTGCCTCAGTTTACCTGTGCATAGTAAGAAC
rs659235	chr1:156972229	AGGGCCATGAAGAGGATCCTTCCTTCCTACGTATCCAGAGTTAAACTCACTACTCTGTCCT	AGGGCCATGAAGAGGATCCTTCCTTCCTACATATCCAGAGTTAAACTCACTACTCTGTCCT
rs1295652	chr1:223359536	GAGGAGGAAGATGCTTGGGGAAAGAAGGTCGTTGAAGGGCTACTGCATATACCAGGGAACC	GAGGAGGAAGATGCTTGGGGAAAGAAGGTCATTGAAGGGCTACTGCATATACCAGGGAACC
rs6060491	chr20:33638514	ACAGAGCCTGGCACACAGGAGGACTTGAAATATCATTGAGAGGCCAGGCGTGGTGGCTGAG	ACAGAGCCTGGCACACAGGAGGACTTGAAACATCATTGAGAGGCCAGGCGTGGTGGCTGAG
rs4821494	chr22:35202660	CTACGGACCGGAAGCAATGGGCAGGCCGTCGGGGAACGGATTGGAAGAGGCGGGCGGGCCC	CTACGGACCGGAAGCAATGGGCAGGCCGTCTGGGAACGGATTGGAAGAGGCGGGCGGGCCC
rs3814247	chr12:2815157	ACAGGGAGCTTCAACAGCTTATTTTTTAAACTGGTGATGAGTGAAGAGTACTGGTTATCTT	ACAGGGAGCTTCAACAGCTTATTTTTTAAAGTGGTGATGAGTGAAGAGTACTGGTTATCTT
rs11062373	chr12:2815908	CACATGTACTTTCAGACAAACCAGATGTCTGCTGAGCTTCTAGGAACCAAGCCTCTTTGAG	CACATGTACTTTCAGACAAACCAGATGTCTACTGAGCTTCTAGGAACCAAGCCTCTTTGAG
rs11062377	chr12:2820563	GCTAGTCACTCACATCTGCTAACAACAGACTGGCTGCAGTACAGAACGTCATCTCTTGCTA	GCTAGTCACTCACATCTGCTAACAACAGACCGGCTGCAGTACAGAACGTCATCTCTTGCTA
rs7958378	chr12:2824345	ATCGAAATTCCTGTCTTGGAATTTGGACAATGGCAAGATGCAGCCACATTCTTTACAAGCG	ATCGAAATTCCTGTCTTGGAATTTGGACAACGGCAAGATGCAGCCACATTCTTTACAAGCG
rs3760292	chr17:61656602	AGAAACCTGTCTAGACAGATCCAAGACATATTAAGAATGGATGAGGAGGACTTTGTATTGA	AGAAACCTGTCTAGACAGATCCAAGACATACTAAGAATGGATGAGGAGGACTTTGTATTGA
rs12944940	chr17:61662178	ATGATATTAAACATTTAGCAACAGTTTAGATTATTTGTTTAAAAACCTACTTTCAATGTTG	ATGATATTAAACATTTAGCAACAGTTTAGACTATTTGTTTAAAAACCTACTTTCAATGTTG
rs6509523	chr19:56459017	TGACTTGGCTAAAGATACTTCTGCTCTCCCCATCCCCACATCCTCTTTCAGTTACGCATCA	TGACTTGGCTAAAGATACTTCTGCTCTCCCTATCCCCACATCCTCTTTCAGTTACGCATCA
rs6603883	chr1:16228282	TAAGCAGTTGCCTCCTAAGCAGCAGGCCTGAGAGAGTGGCCCAGAAATAGACCTGGATGCC	TAAGCAGTTGCCTCCTAAGCAGCAGGCCTGGGAGAGTGGCCCAGAAATAGACCTGGATGCC
rs11260822	chr1:16231117	CAGTGAGTCTTATAAAGCGGCACCAAAACGCGGTATTTATAGTGACATAATCAGCCCTAAT	CAGTGAGTCTTATAAAGCGGCACCAAAACGTGGTATTTATAGTGACATAATCAGCCCTAAT
rs12408442	chr1:16237327	TCCCCCATTCACCAGAAATCTGTCCCAGGCTCCCTGGCTGCCATGCTCCCTGGATAAACCC	TCCCCCATTCACCAGAAATCTGTCCCAGGCCCCCTGGCTGCCATGCTCCCTGGATAAACCC
rs2074143	chr17:39212148	ATGCAGGGCCCAATAAACATTTCGTGGCGGAGGTACACCTAGGGGTCGCTTCAGTCTTTCA	ATGCAGGGCCCAATAAACATTTCGTGGCGGGGGTACACCTAGGGGTCGCTTCAGTCTTTCA
rs4793028	chr17:39212738	CAAAAGATAGTCTCTGTACTGGAGGAAAGCTGCCCTCCCCTACTGCCATGAAAAACTGGCA	CAAAAGATAGTCTCTGTACTGGAGGAAAGCCGCCCTCCCCTACTGCCATGAAAAACTGGCA
rs2301682	chr17:39213552	TGGAATGGTACCCCATAAAGAGATCAACAGGAAACCAGACCAGGTCACAGCTTTGGGATGA	TGGAATGGTACCCCATAAAGAGATCAACAGTAAACCAGACCAGGTCACAGCTTTGGGATGA
rs2301683	chr17:39216281	CAGCCTAGAGAGAGTCTCAGAAAAATCCCTGAACAGCTAGAGTCAGATCACATGAAATGTA	CAGCCTAGAGAGAGTCTCAGAAAAATCCCTAAACAGCTAGAGTCAGATCACATGAAATGTA
rs7215012	chr17:39217210	CCACCCAAGGGAGAAAGATAAATGGACACTTAGGCGTTCCAAAGAATAGTTCTGTATAATT	CCACCCAAGGGAGAAAGATAAATGGACACTCAGGCGTTCCAAAGAATAGTTCTGTATAATT
rs2079006	chr17:39221271	GCTAAGGGTGGGGTGTTGAAATCCCCAACTCTAATTGTGGATTTGTCTATTTCTCTTTTTA	GCTAAGGGTGGGGTGTTGAAATCCCCAACTGTAATTGTGGATTTGTCTATTTCTCTTTTTA
rs6559634	chr9:81541313	CAATTCTAGGTTCATTGTCTACATCTCTTTTTTTTGTGCATTATAATGGAATTCACTTCAT	CAATTCTAGGTTCATTGTCTACATCTCTTTATTTTGTGCATTATAATGGAATTCACTTCAT
rs5936007	chrX:15444391	GTGGTATTTTATTGTAAAGGACCCACATCCATCAGCTAAATCCAACTGAGAAAGCTTTTTC	GTGGTATTTTATTGTAAAGGACCCACATCCGTCAGCTAAATCCAACTGAGAAAGCTTTTTC
rs6632704	chrX:15445956	CAATGCTAATATATTTTCATAGTTAGAATGCGCCTTCCTTAGCCTTGGATCTCTTTATATG	CAATGCTAATATATTTTCATAGTTAGAATGAGCCTTCCTTAGCCTTGGATCTCTTTATATG
rs5936009	chrX:15449596	ATTTTAGAATATAGAACAGATGATGTTACAATCTTTTGGTATGCTTAATTTTATGCGCGCA	ATTTTAGAATATAGAACAGATGATGTTACAGTCTTTTGGTATGCTTAATTTTATGCGCGCA
rs9654749	chr7:72585037	AGTGACAGTGACAGGACAACGATGAGGAGGCCCAGGGGCTGCTGGGGTCTGGAGGAGGAAG	AGTGACAGTGACAGGACAACGATGAGGAGGTCCAGGGGCTGCTGGGGTCTGGAGGAGGAAG
rs2030921	chr7:72585822	TAGCTGCATTTCACAGATGAGGACATTGAGGCTCCCAGAGGTGCATACAAAGTCATAAGCC	TAGCTGCATTTCACAGATGAGGACATTGAGCCTCCCAGAGGTGCATACAAAGTCATAAGCC
rs2030922	chr7:72586115	ATAGTGCTTTGGGATGAAATTCACTATATGCCTGAATGTAAATTTCTTTCCTCTTTTTCTG	ATAGTGCTTTGGGATGAAATTCACTATATGTCTGAATGTAAATTTCTTTCCTCTTTTTCTG
rs737923	chr22:17506879	ACGTCACTATAAATGCTAGACTTTATTGGAAATGTAGTCCTTGTCCTGCCCCGCGCTATTC	ACGTCACTATAAATGCTAGACTTTATTGGAGATGTAGTCCTTGTCCTGCCCCGCGCTATTC
rs715544	chr22:17508159	TCGGCATTTTTAAGGAATTTCTTCCCAAACGAAAGATGTGAATTGTGTTGGACAAATAAAT	TCGGCATTTTTAAGGAATTTCTTCCCAAACAAAAGATGTGAATTGTGTTGGACAAATAAAT
rs4808901	chr19:15018276	CAAGGCAAGTAACAGGACAATTTTGTAGAACGGGCCCACCTATGTAACTAACACTGCGAAT	CAAGGCAAGTAACAGGACAATTTTGTAGAATGGGCCCACCTATGTAACTAACACTGCGAAT
rs12981586	chr19:15020506	GGAATCATCATGATGCATCAGTTAAGGCAACTGGGCTGGAACATTTTAGGGGTTGTTTGTT	GGAATCATCATGATGCATCAGTTAAGGCAATTGGGCTGGAACATTTTAGGGGTTGTTTGTT
rs3181303	chr19:15021723	ACCTCTGTGCTCCCTGCCACACTGTTGGCCATGATGGAGACAGAGATAATGAAGTCAGGCT	ACCTCTGTGCTCCCTGCCACACTGTTGGCCGTGATGGAGACAGAGATAATGAAGTCAGGCT
rs3181304	chr19:15021909	TCAAGAGGGATCCTAAAACCTACCTGGGTCACCATTGCTGTTAAGCACCTAGAGCTCTCCC	TCAAGAGGGATCCTAAAACCTACCTGGGTCGCCATTGCTGTTAAGCACCTAGAGCTCTCCC
rs3761057	chr19:15022606	TCACACATCTATTCATCCGTCTGTCTACCCATCTATTAATCAGTCATCCCATATACCCAT	TCACACATCTATTCATCCGTCTGTCTACCCGTCTATTAATCAGTCATCCCATATACCCAT
rs3761056	chr19:15022826	TCATCTATCCATCCATTCACCCACTCACCCTTCCATCTATTCATCTGTCCATCTACTTAT	TCATCTATCCATCCATTCACCCACTCACCCATCCATCTATTCATCTGTCCATCTACTTAT
rs11085944	chr19:15023563	AGATAATATCAAAGTTGCATTCCCCACTTCGATGACATTCTCCTTTTAAACACTCCTCCAA	AGATAATATCAAAGTTGCATTCCCCACTTCAATGACATTCTCCTTTTAAACACTCCTCCAA
rs2158467	chr19:15023755	CCCACGGGAGACACAGGAAGTTTTTGGGGGCGGAGTGGGGGACATTGTGGGGTAGGCTCAG	CCCACGGGAGACACAGGAAGTTTTTGGGGGTGGAGTGGGGGACATTGTGGGGTAGGCTCAG
rs2158468	chr19:15023758	ACGGGAGACACAGGAAGTTTTTGGGGGCGGAGTGGGGGACATTGTGGGGTAGGCTCAGCAG	ACGGGAGACACAGGAAGTTTTTGGGGGCGGGGTGGGGGACATTGTGGGGTAGGCTCAGCAG
rs9303029	chr17:78002104	CCGGGATCCGGGCGGAGCCGCAGGAGGAGGCGGGTGGTTCCTGCTAAAGAAGCCAGTTTTC	CCGGGATCCGGGCGGAGCCGCAGGAGGAGGTGGGTGGTTCCTGCTAAAGAAGCCAGTTTTC
rs9896620	chr17:78004496	ACACTTGAACAAAGGTCTCTGGTTTTCCTACGCAGCGGTCCCTGCGGACTTCCACAGTGTT	ACACTTGAACAAAGGTCTCTGGTTTTCCTAGGCAGCGGTCCCTGCGGACTTCCACAGTGTT
rs9902567	chr17:78004641	TCTTGCACCGCCCTTAATCCATTTAACCCTGAGTTGACACAGCACAGGTTTCAGAGAGCAC	TCTTGCACCGCCCTTAATCCATTTAACCCTCAGTTGACACAGCACAGGTTTCAGAGAGCAC
rs7209788	chr17:78009203	TTGGAGGAGTAAGTGTTATCTTTACTTTGTAAGCTGTAAGGGCCCAAATCAATGTACTTGG	TTGGAGGAGTAAGTGTTATCTTTACTTTGTGAGCTGTAAGGGCCCAAATCAATGTACTTGG
rs7218534	chr17:78009270	TATCCATAGTGAACACACGCAAATGTCAAATGGCCATCATTTAGCATCTGCCCTCGGGCTT	TATCCATAGTGAACACACGCAAATGTCAAACGGCCATCATTTAGCATCTGCCCTCGGGCTT
rs12941490	chr17:78009358	GCAGGCCGCGCATGCGCGCTGCTACTCCGCCGAGCCTACGTGACACGACGTCAAGTGGCAA	GCAGGCCGCGCATGCGCGCTGCTACTCCGCTGAGCCTACGTGACACGACGTCAAGTGGCAA
rs28365943	chr17:78009379	CTACTCCGCCGAGCCTACGTGACACGACGTCAAGTGGCAATGGCGGCGGACGAGGGCTGTG	CTACTCCGCCGAGCCTACGTGACACGACGTGAAGTGGCAATGGCGGCGGACGAGGGCTGTG
rs11574796	chr12:53100028	GGCTTTTGGTCAACTGTCAGATCCAAGGAAGGGGCTCAGCAGAGGTTTACATACCCTAGGA	GGCTTTTGGTCAACTGTCAGATCCAAGGAACGGGCTCAGCAGAGGTTTACATACCCTAGGA
rs11574794	chr12:53100375	GTAATTATCCTGCCTCAGCTTCCCGAGTAGCTGGGATTACAGGTGCGGACCACCACATCTG	GTAATTATCCTGCCTCAGCTTCCCGAGTAGTTGGGATTACAGGTGCGGACCACCACATCTG
rs10783626	chr12:53100518	AAAAAAAAAAAAAAAAAAAAAATCCAAAAACCAAAAACCAAAAAAACAATGGGAGCGGAAA	AAAAAAAAAAAAAAAAAAAAAATCCAAAAAACAAAAACCAAAAAAACAATGGGAGCGGAAA
rs17496586	chr11:66072088	GGTAACCAGGAGGGCACTATGAGGCCATTGGACCCTGCTCAGCGTGTGCCAACACTGTATG	GGTAACCAGGAGGGCACTATGAGGCCATTGCACCCTGCTCAGCGTGTGCCAACACTGTATG
rs544021	chr11:66072237	GGTTAGATGACAGGAGATGACCCCAAGGGCCGAGAGGCTCCGCTGACTCGGCTGGGGTGCC	GGTTAGATGACAGGAGATGACCCCAAGGGCGGAGAGGCTCCGCTGACTCGGCTGGGGTGCC
rs490998	chr11:66075548	AATAGCTTCAGCTGCCTCTCATGACCTTTGGCCCTTGGCCTCTCCTCTTAAACCCAGGTGA	AATAGCTTCAGCTGCCTCTCATGACCTTTGACCCTTGGCCTCTCCTCTTAAACCCAGGTGA
rs2894055	chr6:30976607	TTTGGTAAACTGTTTCCATTGGTTTCCCTTATAATCCTATACATTTTATGGGTTTTGTTGT	TTTGGTAAACTGTTTCCATTGGTTTCCCTTGTAATCCTATACATTTTATGGGTTTTGTTGT
rs3869086	chr6:30978147	AGTAGACTGTGGAGGAGAAGCAGGTTTGGACAAGCAGGGCCTGACTTTTAAATTAACTGCA	AGTAGACTGTGGAGGAGAAGCAGGTTTGGAAAAGCAGGGCCTGACTTTTAAATTAACTGCA
rs3909130	chr6:30982144	AAAGCAATAAGAAAAAGAAACATAATAGAAAGATTGGGACAGACCACTGCTTACTAGTTAG	AAAGCAATAAGAAAAAGAAACATAATAGAAGGATTGGGACAGACCACTGCTTACTAGTTAG
rs3130780	chr6:30982287	GCCATAAAGAAGCTCTGTCAATTTTTAGCTTTTCTTTGAAGATTTTAAAACATTAATTGCT	GCCATAAAGAAGCTCTGTCAATTTTTAGCTGTTCTTTGAAGATTTTAAAACATTAATTGCT
rs2284175	chr6:30983124	GAGCAAATAGTTGGTGTCTTAAAAACTGTATTTATCTGGGTCTTCTAAGTAAACGGTTTGA	GAGCAAATAGTTGGTGTCTTAAAAACTGTACTTATCTGGGTCTTCTAAGTAAACGGTTTGA
rs3218802	chr6:30983249	GTGTTAATCGTTAACTCGTGGAAACCGCCCAGAGTGTGTACGCTTTCTTTCTTTTCTTTCC	GTGTTAATCGTTAACTCGTGGAAACCGCCCGGAGTGTGTACGCTTTCTTTCTTTTCTTTCC
rs938893	chr14:19974981	TTCACTTTCCCCACTCTTCTGCCCTCCATGAATAAAGCTGGGCTATATTCGCTCCTGGGTC	TTCACTTTCCCCACTCTTCTGCCCTCCATGGATAAAGCTGGGCTATATTCGCTCCTGGGTC
rs12878052	chr14:19976700	TCCTGTTCTTGGCCTCAGTCATACTGTCACTGGATTGTCTATCTCAGCCATCTCCAGCAAC	TCCTGTTCTTGGCCTCAGTCATACTGTCACCGGATTGTCTATCTCAGCCATCTCCAGCAAC
rs8003245	chr14:19977394	TAGCCCTCTGATGTCTGCTGGAATCTTGAGAGCCATTCTGTTCTGTACCCTTTCCTGCTTT	TAGCCCTCTGATGTCTGCTGGAATCTTGAGTGCCATTCTGTTCTGTACCCTTTCCTGCTTT
rs11624126	chr14:19978859	AGTGGGTGGTGCTGGGGCTAAGACAAGGGCTTACATTTGCTGTCCCCTGCAGGCTGGCGCC	AGTGGGTGGTGCTGGGGCTAAGACAAGGGCCTACATTTGCTGTCCCCTGCAGGCTGGCGCC
rs17277375	chr14:19979312	GATGAGAGATTGAAAACGGTGGCCTATGGACGGAATGTTGCCTGGAAATGAGTTTTTTGAT	GATGAGAGATTGAAAACGGTGGCCTATGGATGGAATGTTGCCTGGAAATGAGTTTTTTGAT
rs12050102	chr14:19980072	ACTATGGCATAGGCCTCATAAGGATGCCAGGAGGGTTAAGCCCGGCTACTCAACACCAAGC	ACTATGGCATAGGCCTCATAAGGATGCCAGTAGGGTTAAGCCCGGCTACTCAACACCAAGC
rs17111750	chr14:19980248	TAAGACTGAATAGAATTGGGTACCAGGATGCGAGAGAAATGAATTTTGCTTGAGCTTTAGT	TAAGACTGAATAGAATTGGGTACCAGGATGTGAGAGAAATGAATTTTGCTTGAGCTTTAGT
rs904896	chr1:36990060	GTCAATGAAACTCCAGGGAACTGTGGACCCCTGACCTTGTGGGTTGAACTGTGAGTGTATG	GTCAATGAAACTCCAGGGAACTGTGGACCCATGACCTTGTGGGTTGAACTGTGAGTGTATG
rs3767048	chr1:36990139	CTTAGACATCTCCAAGCACATGGGCAGCTCCAAGGTACTTTTACAGGTAAATGGGTAGTTG	CTTAGACATCTCCAAGCACATGGGCAGCTCTAAGGTACTTTTACAGGTAAATGGGTAGTTG
rs2072290	chr19:45016856	GAGCATGCGCTCTGTGACCGAGTGAGAATTTACCCAACCCCGCAAAATTGACCAAGGGTGC	GAGCATGCGCTCTGTGACCGAGTGAGAATTCACCCAACCCCGCAAAATTGACCAAGGGTGC
rs6044267	chr20:16653102	ATAAATGTGGGGTTAAATCACTCGATAAAGGTCACTCAGAAGATGGATCATATAGCTAAAC	ATAAATGTGGGGTTAAATCACTCGATAAAGTTCACTCAGAAGATGGATCATATAGCTAAAC
rs2092470	chr20:16655398	TTTTCTAGTCTCAAAGAGAACGACAGTTGTATGATGCTACTTTAGCTCCTTTAGGGAAGGG	TTTTCTAGTCTCAAAGAGAACGACAGTTGTGTGATGCTACTTTAGCTCCTTTAGGGAAGGG
rs3787509	chr20:16656109	TATCTGCACGTGTTTTATGTTTCTCATTAATTGTTTTTGGTATCTTGCTGCAGTAGTTTTA	TATCTGCACGTGTTTTATGTTTCTCATTAAATGTTTTTGGTATCTTGCTGCAGTAGTTTTA
rs3787508	chr20:16656164	GAAGATAACTGAGGTGTCTCTTAGTGACTCTGAATACACATACATTTCCCTACCTTATCTG	GAAGATAACTGAGGTGTCTCTTAGTGACTCCGAATACACATACATTTCCCTACCTTATCTG
rs3761296	chr20:16657662	AATGCTCAAAAATGTTATTTCTGAATTCTGGCTATAACTTGGTTCTACTGGTGAGGCAGGT	AATGCTCAAAAATGTTATTTCTGAATTCTGTCTATAACTTGGTTCTACTGGTGAGGCAGGT
rs12720954	chrX:15379390	GGTGGTGGGCACCTGTAGTCCCAGCTACTCGGGAGGCTGAGGCAGGAGAATGGCGTGAACC	GGTGGTGGGCACCTGTAGTCCCAGCTACTCAGGAGGCTGAGGCAGGAGAATGGCGTGAACC
rs17249262	chr10:3823232	GCATGCAGGACCTGGGTCTGAGGGAGCATCCGGCCGTCCTGCACCGAGAGGCTTTGTCTTC	GCATGCAGGACCTGGGTCTGAGGGAGCATCTGGCCGTCCTGCACCGAGAGGCTTTGTCTTC
rs4924409	chr15:38120342	ATTTTCTTCCAAATGGCCAGCGCCCGTTGCCCACTTCCTGCCCTAGGCTGATGACCTTGTG	ATTTTCTTCCAAATGGCCAGCGCCCGTTGCTCACTTCCTGCCCTAGGCTGATGACCTTGTG
rs2412474	chr15:38121083	CATCTTTGCTATTTATTAAATGGCACCACCGTCTGACCAGTTACTCAAATAAAAACAACCA	CATCTTTGCTATTTATTAAATGGCACCACCATCTGACCAGTTACTCAAATAAAAACAACCA
rs2412475	chr15:38121868	TTTCCATCATCACAAATTCTACTGGACAGCGCTATCATTGATAACATTGGGCCTAGCACAT	TTTCCATCATCACAAATTCTACTGGACAGCACTATCATTGATAACATTGGGCCTAGCACAT
rs4794012	chr17:44420090	GCTGTGAGACTCATCCATCTTGGCTTGTGTGGGTGAAGTTCATTCATTGACACCGCTTATT	GCTGTGAGACTCATCCATCTTGGCTTGTGTTGGTGAAGTTCATTCATTGACACCGCTTATT
rs4794013	chr17:44420287	TCTGCAGGTAATTTCTAGTCTTTTATGCACGTGTAGTTAAATTTTTTTTAAAAAGGTTCCA	TCTGCAGGTAATTTCTAGTCTTTTATGCACATGTAGTTAAATTTTTTTTAAAAAGGTTCCA
rs4794015	chr17:44422825	GAACCAGGGAGCAACAAGCTCAAGCTCAGAGATGCCCCTTGGTTGCTATTTTTGATATAGA	GAACCAGGGAGCAACAAGCTCAAGCTCAGAAATGCCCCTTGGTTGCTATTTTTGATATAGA
rs2411759	chr17:44426073	AATTCAGATAATTAAATTCCATAACTAGACCAAACTGTTCTCCAGGAAAAAATAAAGAAGA	AATTCAGATAATTAAATTCCATAACTAGACTAAACTGTTCTCCAGGAAAAAATAAAGAAGA
rs1390154	chr17:44426482	TCACATTGATTGGTGTTTCATCTCTCCCTTTTGAATGAGCCCAGCACTCACATTAAGGGTT	TCACATTGATTGGTGTTTCATCTCTCCCTTCTGAATGAGCCCAGCACTCACATTAAGGGTT
rs9890278	chr17:44428948	CAGTTCGCTCCGGTTAGCCCTAGCTATCACTCCTCTTCCTTGTCTCCCACCGTTCCTGTCT	CAGTTCGCTCCGGTTAGCCCTAGCTATCACCCCTCTTCCTTGTCTCCCACCGTTCCTGTCT
rs3132950	chr6:32302718	CCTCTTCCCCATACCCACAATTGCCTCCTCGACTAAGGAAGGTGATGGGAAAATGACAATG	CCTCTTCCCCATACCCACAATTGCCTCCTCAACTAAGGAAGGTGATGGGAAAATGACAATG
rs1475960	chr6:32302729	ACACTAGGGTTCCTCTTCCCCATACCCACAATTGCCTCCTCGACTAAGGAAGGTGATGGGA	ACACTAGGGTTCCTCTTCCCCATACCCACAGTTGCCTCCTCGACTAAGGAAGGTGATGGGA
rs3096691	chr6:32302832	TTTGGTGCTGGTGAGTAGTGAAAGGAAAATGGGAAGAGACAACAGGTTTCTCATGGAACCG	TTTGGTGCTGGTGAGTAGTGAAAGGAAAATAGGAAGAGACAACAGGTTTCTCATGGAACCG
rs409715	chr6:32303701	CACGTCAGCCTCCCAAGTAGCTGGGGCAACAGGTGTGCATCACCACGGCCTGCTAATTTTT	CACGTCAGCCTCCCAAGTAGCTGGGGCAACGGGTGTGCATCACCACGGCCTGCTAATTTTT
rs365053	chr6:32303966	ACCATGGACACTACAATGGTAAGAGGTTGGAGAGATGAAGAGTAACCAACAGGGAGGCAGA	ACCATGGACACTACAATGGTAAGAGGTTGGCGAGATGAAGAGTAACCAACAGGGAGGCAGA
rs378088	chr6:32304291	TTGGATGTGGAGTATGAGAAAAAGAGAGGAGTCAGCAATATCTTCAAGGATTTGGGCCTAA	TTGGATGTGGAGTATGAGAAAAAGAGAGGAATCAGCAATATCTTCAAGGATTTGGGCCTAA
rs495089	chr6:32305441	ATGGGGTAGCCAAGGAAGGCCTTGATTAGGTGCCTTTTGAGATGAGGGACAGAGCCACGAA	ATGGGGTAGCCAAGGAAGGCCTTGATTAGGCGCCTTTTGAGATGAGGGACAGAGCCACGAA
rs436845	chr6:32305714	CACATCTCACTGTGGGTGGAGGTAATGGTATCCTCCTCCTGGGGGTATTTTAAGTGAGACA	CACATCTCACTGTGGGTGGAGGTAATGGTACCCTCCTCCTGGGGGTATTTTAAGTGAGACA
rs17795648	chr6:32306845	AAAAGACTGAGAGGTCAATAAGAGATGGCACCTGTAGTTTCAAAAATAAGTACCAAATTAA	AAAAGACTGAGAGGTCAATAAGAGATGGCAACTGTAGTTTCAAAAATAAGTACCAAATTAA
rs2849015	chr6:32306914	TCACCACACCCCTACCATCTCTAATTAGGAGTATTGTGATAGTATCCTACCTGGCTCCCTT	TCACCACACCCCTACCATCTCTAATTAGGAATATTGTGATAGTATCCTACCTGGCTCCCTT
rs6457499	chr6:32306926	TACCATCTCTAATTAGGAGTATTGTGATAGTATCCTACCTGGCTCCCTTGCTTCCAACTTG	TACCATCTCTAATTAGGAGTATTGTGATAGCATCCTACCTGGCTCCCTTGCTTCCAACTTG
rs6457500	chr6:32306939	TAGGAGTATTGTGATAGTATCCTACCTGGCTCCCTTGCTTCCAACTTGCCCCCAACTGTTG	TAGGAGTATTGTGATAGTATCCTACCTGGCACCCTTGCTTCCAACTTGCCCCCAACTGTTG
rs389713	chr6:32307202	CACACTCTTTCTAGGGGCAACCCACCTTCCGTGACTGATTAATGTGGGGGGCAAAAACCCA	CACACTCTTTCTAGGGGCAACCCACCTTCCATGACTGATTAATGTGGGGGGCAAAAACCCA
rs389703	chr6:32307217	TTGCTTCCCCAAGGTCACACTCTTTCTAGGGGCAACCCACCTTCCGTGACTGATTAATGTG	TTGCTTCCCCAAGGTCACACTCTTTCTAGGAGCAACCCACCTTCCGTGACTGATTAATGTG
rs7370867	chr2:173236367	TGGGCTGGGCTTTAAAAAGTGTCAACTGAGCTTCCTTAGAGAACAGGGTTTCATCAGAGCC	TGGGCTGGGCTTTAAAAAGTGTCAACTGAGATTCCTTAGAGAACAGGGTTTCATCAGAGCC
rs1920978	chr2:173241403	GAGACTATGAGCCTCAAGAATTTACAGACATGGACAGGGAGAACTCTAGACTTTCACAAAC	GAGACTATGAGCCTCAAGAATTTACAGACACGGACAGGGAGAACTCTAGACTTTCACAAAC
rs3765065	chr2:173245761	GCTTGCCAAACAGTAGTACGTAAATACGAAAGCTGAACACTGGGACGTGTGGCCCTAAATA	GCTTGCCAAACAGTAGTACGTAAATACGAATGCTGAACACTGGGACGTGTGGCCCTAAATA
rs12379987	chr9:127641242	ACCTATGCCACCTCCTACAGATGAGTCCACTGAGGCCACCAATAGTAGATCTGGAAAAAAT	ACCTATGCCACCTCCTACAGATGAGTCCACCGAGGCCACCAATAGTAGATCTGGAAAAAAT
rs17251170	chr19:50144984	CAAAGTACTGGGGTGACAGGCATGAGCCACCGCGCCATGCCAAAATCCAGCCTTCTCATTT	CAAAGTACTGGGGTGACAGGCATGAGCCACTGCGCCATGCCAAAATCCAGCCTTCTCATTT
rs17251177	chr19:50144991	CTGGGGTGACAGGCATGAGCCACCGCGCCATGCCAAAATCCAGCCTTCTCATTTGTAAAAT	CTGGGGTGACAGGCATGAGCCACCGCGCCAGGCCAAAATCCAGCCTTCTCATTTGTAAAAT
rs17251184	chr19:50145005	ATGAGCCACCGCGCCATGCCAAAATCCAGCCTTCTCATTTGTAAAATAACAAATCATAGAC	ATGAGCCACCGCGCCATGCCAAAATCCAGCTTTCTCATTTGTAAAATAACAAATCATAGAC
rs17251191	chr19:50145079	AGTGGCCTCTGACAGTCTCCAGTTGTTAACGGTGAATGGTGTCCAGGTTTTTGGCGTCCTG	AGTGGCCTCTGACAGTCTCCAGTTGTTAACAGTGAATGGTGTCCAGGTTTTTGGCGTCCTG
rs17257692	chr19:50145496	GAGATAAGGTCTTGCTCTGTCGCCCAGGCTGAAGTGCAGTGGTGAGATCTTGGCTTACTGT	GAGATAAGGTCTTGCTCTGTCGCCCAGGCTAAAGTGCAGTGGTGAGATCTTGGCTTACTGT
rs17257699	chr19:50145603	AAGTAGTTGGGACTAGGGATGCCCACTGCCACACCTGGCTAATTTTTTGTATTTTTAGTAG	AAGTAGTTGGGACTAGGGATGCCCACTGCCGCACCTGGCTAATTTTTTGTATTTTTAGTAG
rs17257706	chr19:50145718	ATCTGCCCACCTTGCCCTTCCAAAGTGTTGGGATTACGGGTGTGAACCACCGCACCAGGCC	ATCTGCCCACCTTGCCCTTCCAAAGTGTTGAGATTACGGGTGTGAACCACCGCACCAGGCC
rs17251198	chr19:50146076	CAGGAGAATTGCTTGTACCCTGGAGGCGGAGATAGTGCCACTGCACTCCAGCCTGGGCAGC	CAGGAGAATTGCTTGTACCCTGGAGGCGGAAATAGTGCCACTGCACTCCAGCCTGGGCAGC
rs11083752	chr19:50146203	CACAGAAGGCAGAAGGTGCAAATAAGCAGAGGCTCCATGGTCTGAAGGAGGCCAGTGCTGG	CACAGAAGGCAGAAGGTGCAAATAAGCAGAAGCTCCATGGTCTGAAGGAGGCCAGTGCTGG
rs7247551	chr19:50146606	GTCCACTTGGTTCCCACGGACTCAAGCCAAGCCAAAGCACTGCCCGGACCAGTTCGGCTTC	GTCCACTTGGTTCCCACGGACTCAAGCCAAACCAAAGCACTGCCCGGACCAGTTCGGCTTC
rs3760625	chr19:50148781	CACAACAGTCCCAGGTCAGCCTGCCCAGTTGGGGAGACACACCCATCCCTGACAGTGATGA	CACAACAGTCCCAGGTCAGCCTGCCCAGTTAGGGAGACACACCCATCCCTGACAGTGATGA
rs3760626	chr19:50148945	GAGACCTAGAGGAAAGTGGAGGAAACCGATAATAAAATGATAATTATATATTCAGAATATC	GAGACCTAGAGGAAAGTGGAGGAAACCGATGATAAAATGATAATTATATATTCAGAATATC
rs3760627	chr19:50149020	ACTCTTTTTCCAGGTAATATATAAGGTTCATAATCACAGCGCTCCAAATATTGACCACTTA	ACTCTTTTTCCAGGTAATATATAAGGTTCACAATCACAGCGCTCCAAATATTGACCACTTA
rs2274687	chr1:23180975	GACAGCCCTCTGGGTCACCTCAGTCTTGGTATGATTCATGCATTACCTATCTCTTCCATTC	GACAGCCCTCTGGGTCACCTCAGTCTTGGTGTGATTCATGCATTACCTATCTCTTCCATTC
rs7527518	chr1:23189582	AGTCACACTTGCCAACATGTCTCACGTCAAAGTCTACATTATTAAAAACAAACAGGAGGCT	AGTCACACTTGCCAACATGTCTCACGTCAATGTCTACATTATTAAAAACAAACAGGAGGCT
rs12408468	chr1:23190757	TGTTCCCAATGCACTTTGTCTGTATCTCTACTTGAGCAATTTTCTTAGTCTACTTTGCATT	TGTTCCCAATGCACTTTGTCTGTATCTCTATTTGAGCAATTTTCTTAGTCTACTTTGCATT
rs2562571	chr5:36633598	CTTGCTGGTCCCCTCACAGGACTTGTCTTGCTCCCGCCATTTCTTCCGCCTGGCACGCCTC	CTTGCTGGTCCCCTCACAGGACTTGTCTTGTTCCCGCCATTTCTTCCGCCTGGCACGCCTC
rs6896326	chr5:36633923	TCCAGTGCCTTCAAACATAGTGGGAATCTGTAGAATTCTGAGAGTAGTATTTTCATCCGGA	TCCAGTGCCTTCAAACATAGTGGGAATCTGCAGAATTCTGAGAGTAGTATTTTCATCCGGA
rs7730144	chr5:36636390	CATGTCAGCAAACAACTGAGGCCTGGGGTACGAGTCAACTAGTCATCCTGCGTTAATTCTA	CATGTCAGCAAACAACTGAGGCCTGGGGTAGGAGTCAACTAGTCATCCTGCGTTAATTCTA
rs4869675	chr5:36636676	CTCAGGAGCACAGCCCAAATCTTGAATGTATGTTTTAACGCTTAAACTAACTTTATTCTAA	CTCAGGAGCACAGCCCAAATCTTGAATGTAGGTTTTAACGCTTAAACTAACTTTATTCTAA
rs2731877	chr5:36637612	CCCATTCAATTAGAGCAGCCACACTTGGATTTATTTTACATTGTAATGATTGAAGAAGGAA	CCCATTCAATTAGAGCAGCCACACTTGGATCTATTTTACATTGTAATGATTGAAGAAGGAA
rs7703253	chr5:36638526	TTTTAAGGCATCATTATGTCCACCTGTTGGATCACTTGTGAGAAAAATAACAGTTGGTGTA	TTTTAAGGCATCATTATGTCCACCTGTTGGCTCACTTGTGAGAAAAATAACAGTTGGTGTA
rs7704100	chr5:36638814	TCAGTGTCAGCCGACCCCTTCAAGGGCCTTGATATTCTCAAATGGTCAGTATTTTTCAGTG	TCAGTGTCAGCCGACCCCTTCAAGGGCCTTAATATTCTCAAATGGTCAGTATTTTTCAGTG
rs2562575	chr5:36638983	CCCTGCTTAAATCCTGTGGCTGGCTCCCCATTGACTAGGAGTGGAGTTCAAGTTGTAAATT	CCCTGCTTAAATCCTGTGGCTGGCTCCCCACTGACTAGGAGTGGAGTTCAAGTTGTAAATT
rs2562576	chr5:36639047	CCCCTACTGGCCTGTTCTCCAGCAGGAACCACTACTGGCTCCCTGCCATGCCACACGATGG	CCCCTACTGGCCTGTTCTCCAGCAGGAACCGCTACTGGCTCCCTGCCATGCCACACGATGG
rs2562578	chr5:36639132	AAACAGTGTACACAATGTGGATCCAGGCACAGCCCCTTCTCTTAAGTTGCTACCAGTCTTT	AAACAGTGTACACAATGTGGATCCAGGCACGGCCCCTTCTCTTAAGTTGCTACCAGTCTTT
rs2731881	chr5:36639386	TTCACCTCTCTGTAGTTGGATGTTTTTAGGTTTCATATGACTATAACTTTAAAATAAAACC	TTCACCTCTCTGTAGTTGGATGTTTTTAGGCTTCATATGACTATAACTTTAAAATAAAACC
rs2731882	chr5:36639510	CATTCATATTTAAGAAGAAAAAAAAATCAAAACAAAATGGAAGACAACTACCACAAGTTCT	CATTCATATTTAAGAAGAAAAAAAAATCAAGACAAAATGGAAGACAACTACCACAAGTTCT
rs2731883	chr5:36639841	TTGAATGGTGAAGTTTGACTGGCCTGTACCATGCTAAGATCAGCACGTGCTTATTACCGTA	TTGAATGGTGAAGTTTGACTGGCCTGTACCGTGCTAAGATCAGCACGTGCTTATTACCGTA
rs2562581	chr5:36640857	AATAAATGCTTTTAAAAGTAGTCATGGCATTGAGAAATGGCTCCATGCACCTAAACCAGAG	AATAAATGCTTTTAAAAGTAGTCATGGCATAGAGAAATGGCTCCATGCACCTAAACCAGAG
rs2731886	chr5:36641766	CTGAACAGCAACCTATCTTTTGAATCACCAAATCTCAAGTGTACTTTGCACTCTTGGTCTT	CTGAACAGCAACCTATCTTTTGAATCACCACATCTCAAGTGTACTTTGCACTCTTGGTCTT
rs894269	chr4:46234540	ATTTAATATGTTACAACCTAAACAAACATTTGCTCTCTTATTTAGCTTGCTCTGTGAAGAA	ATTTAATATGTTACAACCTAAACAAACATTCGCTCTCTTATTTAGCTTGCTCTGTGAAGAA
rs1025852	chr4:46241259	AGGCCATTTCCAGATGGAAACTGGACGAATAAGTGTCTGATTCACCATGTTTACTCCTTCT	AGGCCATTTCCAGATGGAAACTGGACGAATGAGTGTCTGATTCACCATGTTTACTCCTTCT
rs17719981	chr17:23821542	GGTCAGAGCACCTGGAGTCGGATTTGGGGTCTGGGATTCTCAGAGCTGTAAACACGATGCC	GGTCAGAGCACCTGGAGTCGGATTTGGGGTTTGGGATTCTCAGAGCTGTAAACACGATGCC
rs11738768	chr5:95263536	CTACTGTATTACCAACATCCTTATTTACTTCTGGGCAATTGAGTCCATTACTTTTGAGTCA	CTACTGTATTACCAACATCCTTATTTACTTATGGGCAATTGAGTCCATTACTTTTGAGTCA
rs3777197	chr5:95263672	AAGACAGACAAGGTTATCAGAATTGATACTATTTATGAAGACAGTGTTTGGTTGATGACTG	AAGACAGACAAGGTTATCAGAATTGATACTGTTTATGAAGACAGTGTTTGGTTGATGACTG
rs3777196	chr5:95263916	TTTGGCACGTGAACCTGTATGTTTGTGTAGTTAGTTAATGGCTAAGCCGCGAAACTCTAGG	TTTGGCACGTGAACCTGTATGTTTGTGTAGGTAGTTAATGGCTAAGCCGCGAAACTCTAGG
rs11744881	chr5:95266621	ATATGTTACCAGGATGAGATGATGCTCTAGATTCTATCAAATGATCAACACTAATAACTCT	ATATGTTACCAGGATGAGATGATGCTCTAGTTTCTATCAAATGATCAACACTAATAACTCT
rs2548594	chr5:95270170	CCATTTCCCAGTTGCAACAGCGTTAACAAACATTAGCATTCCTTAAAATTTTAATAGGAAA	CCATTTCCCAGTTGCAACAGCGTTAACAAATATTAGCATTCCTTAAAATTTTAATAGGAAA
rs3777194	chr5:95271140	CTGCTGCTGTTTATATAAAGAGCCCAGGGAGTTGATTAGCATTTGGGTCTGGGAAGAGAAT	CTGCTGCTGTTTATATAAAGAGCCCAGGGAATTGATTAGCATTTGGGTCTGGGAAGAGAAT
rs2270554	chr5:95271890	AAAAAAAATCACTCGTCACCACTGCTTCTAATTCACCGATATTTTAAGTCTGCTCACTGAC	AAAAAAAATCACTCGTCACCACTGCTTCTACTTCACCGATATTTTAAGTCTGCTCACTGAC
rs751845	chr3:150287751	AGAGCCATGGAGGGCCTCAGAGCGCCCCTCTGCAGTTCCTTGAGGAAAACAAGGGCCTCCC	AGAGCCATGGAGGGCCTCAGAGCGCCCCTCCGCAGTTCCTTGAGGAAAACAAGGGCCTCCC
rs2607997	chr3:150291695	GACTGAACTATTCAGAAGTGACTAAATTAGGTTACCTGCCATTAGGCAGAATGAAGGTTTA	GACTGAACTATTCAGAAGTGACTAAATTAGTTTACCTGCCATTAGGCAGAATGAAGGTTTA
rs4280589	chr3:150294681	GATGCCCCCCAAGAGAAACATTAAAGCACCAATGACCTAGGTTAATGTATTGAAGTCTGTA	GATGCCCCCCAAGAGAAACATTAAAGCACCGATGACCTAGGTTAATGTATTGAAGTCTGTA
rs2091040	chr17:44563075	CTTATTCATTGTAAGTTTTCTTCTTATTGTTGCAGAAACCATAGTTTCTGCCTGTAGCCCC	CTTATTCATTGTAAGTTTTCTTCTTATTGTCGCAGAAACCATAGTTTCTGCCTGTAGCCCC
rs2177308	chr17:44564860	CTATCACCACGGTCCCTACCGTTCCTTCCTCGCTATGCTGTGTCCCCGTGCCCTCCAACCT	CTATCACCACGGTCCCTACCGTTCCTTCCTTGCTATGCTGTGTCCCCGTGCCCTCCAACCT
rs2411898	chr17:44564980	TCCTGACCGCCCCCACACCAGCGCCCCCATCTCTACCCTGGACTTTTCTCCTCCGCTGCCG	TCCTGACCGCCCCCACACCAGCGCCCCCATATCTACCCTGGACTTTTCTCCTCCGCTGCCG
rs2071506	chr3:52801316	AGCCAGGCTGGTATTTTCCAAAGGCAGAGATGGTCCCTGCCCAGAAGCTGTGATTTCAGGG	AGCCAGGCTGGTATTTTCCAAAGGCAGAGACGGTCCCTGCCCAGAAGCTGTGATTTCAGGG
rs746694	chr3:52801660	GCTAGGGGCTCTGTGTTCATAGGGCCTGGGGCAGCCTTTGAGCTCAGCATTGGTGTTATTG	GCTAGGGGCTCTGTGTTCATAGGGCCTGGGACAGCCTTTGAGCTCAGCATTGGTGTTATTG
rs2071507	chr3:52801747	CTTCCCAGGTATCCTGGGGTTCTCCAGGAAGAGCTGTGAGCTGCCAGCTGTCGGGGTCACC	CTTCCCAGGTATCCTGGGGTTCTCCAGGAAAAGCTGTGAGCTGCCAGCTGTCGGGGTCACC
rs2071508	chr3:52801886	GATTCCGTCTAATTATAAAGTCTGCATGACGACTCTGGTTCCTCCAAGTCCCCAGCCATCC	GATTCCGTCTAATTATAAAGTCTGCATGACAACTCTGGTTCCTCCAAGTCCCCAGCCATCC
rs2239699	chr3:52802955	TGTCCTGGAAGCTGGAGCCCAGCCTCACTACGACTTTTAGGGCAATGACTCCCCAAAAGGC	TGTCCTGGAAGCTGGAGCCCAGCCTCACTATGACTTTTAGGGCAATGACTCCCCAAAAGGC
rs405509	chr19:50100676	CCAGGAAGGGAGGACACCTCGCCCAGTAATACAGACACCCTCCTCCATTCTGGGGGCCAAG	CCAGGAAGGGAGGACACCTCGCCCAGTAATCCAGACACCCTCCTCCATTCTGGGGGCCAAG
rs6768972	chr3:3196785	CTGTTCATGCAGCATTAGTTTCAATTCTTAAAATAAGAAGCATATATGTGAAGGCTGGGGA	CTGTTCATGCAGCATTAGTTTCAATTCTTACAATAAGAAGCATATATGTGAAGGCTGGGGA
rs1669317	chr3:3197730	CTTGCTTGCGTTCTCTCTCTCTTTCACGTGGGCACACACACACGCACACCAATACACCGGC	CTTGCTTGCGTTCTCTCTCTCTTTCACGTGTGCACACACACACGCACACCAATACACCGGC
rs1672747	chr3:3200230	GCACTTCCAAAATTAATGAATTCATCTATTGAAAAAATGATAACCAAATATGCCTACAAGT	GCACTTCCAAAATTAATGAATTCATCTATTCAAAAAATGATAACCAAATATGCCTACAAGT
rs1672746	chr3:3201378	TTTTCCTCTTTCTAGGTCTGCATAAAGCTGACAAGATCCATCTTTCATTCCCTCATAACTT	TTTTCCTCTTTCTAGGTCTGCATAAAGCTGGCAAGATCCATCTTTCATTCCCTCATAACTT
rs1621916	chr3:3202104	GTATTTTTTGCTCAAATCAAATGTTCTATGGATTTGGTGACTCTCCAGGGCATCATGTTCT	GTATTTTTTGCTCAAATCAAATGTTCTATGCATTTGGTGACTCTCCAGGGCATCATGTTCT
rs711606	chr3:3202407	AAATCACAAAGTTAGTACCACCCTGTGGCAGACATTACAAATGTAACCAAGTTCCACTTCT	AAATCACAAAGTTAGTACCACCCTGTGGCACACATTACAAATGTAACCAAGTTCCACTTCT
rs3846136	chr3:3204244	GCTTAGATCCAATTTAGTCCACAGAGGTGCATGCTTAGACAAAAGCTGTTTTTTTTCTCAG	GCTTAGATCCAATTTAGTCCACAGAGGTGCGTGCTTAGACAAAAGCTGTTTTTTTTCTCAG
rs3914767	chr3:3205619	GAAAGTTGTGGGAACCCCTTGGTCTATGCCTGCACAGTCTCAGTAGAAGCTTTGCAATATT	GAAAGTTGTGGGAACCCCTTGGTCTATGCCCGCACAGTCTCAGTAGAAGCTTTGCAATATT
rs1669309	chr3:3206172	AAGTGTTTCAGAATAATGAGAGCTTCACCACTCTCTTATTTCCTGCCCAAACCTGGTGAAG	AAGTGTTTCAGAATAATGAGAGCTTCACCAGTCTCTTATTTCCTGCCCAAACCTGGTGAAG
rs7502198	chr17:67622102	TTATGAGCCCAGAGGACAGAGCAGAGTTCACGTGGACAGAGGCTGGATTCTGCGGGAAACC	TTATGAGCCCAGAGGACAGAGCAGAGTTCATGTGGACAGAGGCTGGATTCTGCGGGAAACC
rs9893662	chr17:67623466	TCCTGCAGCCTTTGCAGTCAGCGACAGGCATCATGAAATTAATTTGAAATAAACAATGACA	TCCTGCAGCCTTTGCAGTCAGCGACAGGCACCATGAAATTAATTTGAAATAAACAATGACA
rs12601701	chr17:67626953	ACCCGGGACACAGAAATAGGTCCACACTACGCGGACTTTTTTCTCCTAGGAAAGGACGATG	ACCCGGGACACAGAAATAGGTCCACACTACACGGACTTTTTTCTCCTAGGAAAGGACGATG
rs28365949	chr17:37196591	TCCACGGGACAGTCAGGCGAGATAGCCAGTGAGCTCGCACCAGAGGGTGGGCGTCTCCCCC	TCCACGGGACAGTCAGGCGAGATAGCCAGTAAGCTCGCACCAGAGGGTGGGCGTCTCCCCC
rs753663	chr17:37199931	GTAACTGGCGCAGAGAGGTTCAGTGAGGGACTGGTGGGAGGGAGGCTCTTTTCTAGGGGAG	GTAACTGGCGCAGAGAGGTTCAGTGAGGGATTGGTGGGAGGGAGGCTCTTTTCTAGGGGAG
rs7250092	chr19:50653776	CATGAGCCACCGCGCCCGGCCAAGTCAGTGGGTCTTTAGGAGCTGTTTCGTACGGTGTGAC	CATGAGCCACCGCGCCCGGCCAAGTCAGTGCGTCTTTAGGAGCTGTTTCGTACGGTGTGAC
rs339729	chr3:42665289	GCTAGGAGAAGAAAAGGAGCTGCCAAAGGAGATGAGGTGTCTTCACTGGCTGGGTCAGCAG	GCTAGGAGAAGAAAAGGAGCTGCCAAAGGATATGAGGTGTCTTCACTGGCTGGGTCAGCAG
rs339727	chr3:42668130	CAGGCAATGCAACTCAACTCGCACAGCATGTGGCCAGTGGGCTGGCAGGGAAGTTCAAAGC	CAGGCAATGCAACTCAACTCGCACAGCATGGGGCCAGTGGGCTGGCAGGGAAGTTCAAAGC
rs3846059	chr3:42670317	GGCAGGAGATTTAAATCCCAGGACTACAACCGCAGCGATCAAATCATCTAAGGTGACTGGC	GGCAGGAGATTTAAATCCCAGGACTACAACTGCAGCGATCAAATCATCTAAGGTGACTGGC
rs339726	chr3:42672290	TCCTTGGCCCTTGGGGGGCCCTAAACCTCATGACCTGATTGGACTCTCTTGACTGGGCACA	TCCTTGGCCCTTGGGGGGCCCTAAACCTCACGACCTGATTGGACTCTCTTGACTGGGCACA
rs339725	chr3:42672609	GGGCTCCTTAGGGCCTCCAGGGGCCAAAGACTGGCAGGAGAAGTGGCTTGGATAAGGGTTT	GGGCTCCTTAGGGCCTCCAGGGGCCAAAGAGTGGCAGGAGAAGTGGCTTGGATAAGGGTTT
rs17251326	chr19:50136582	GGGTTTCACCGTGTTAGCCAAGATGGTCTCAATCTCCTGACCTCGTGATCCGCCTGCCTCG	GGGTTTCACCGTGTTAGCCAAGATGGTCTCGATCTCCTGACCTCGTGATCCGCCTGCCTCG
rs6594644	chr5:112062495	TAGCCTAGGAGCAATAAGCTAGATCATATATCCTATGTGTGTCCTAGGCTATACCATCTAG	TAGCCTAGGAGCAATAAGCTAGATCATATAGCCTATGTGTGTCCTAGGCTATACCATCTAG
rs10213844	chr5:112069070	AAAAACATTAAAAGGAAAATGCTAAAATGAGTTCTGCTCTAGTTCAAAAGAAAAGAACGAC	AAAAACATTAAAAGGAAAATGCTAAAATGAATTCTGCTCTAGTTCAAAAGAAAAGAACGAC
rs1441375	chr5:112069493	ATGGGATGGAGAAGGGTGGGTGATTGTGGGACAGTGGGCAGGGTTTATATTACATATGTTG	ATGGGATGGAGAAGGGTGGGTGATTGTGGGGCAGTGGGCAGGGTTTATATTACATATGTTG
rs6862050	chr5:112069740	TGGTGCTATGCACTGTGTATTCATTGGTAAACAAAACGTATTCCCTGTCTTATGGAGTCGA	TGGTGCTATGCACTGTGTATTCATTGGTAAGCAAAACGTATTCCCTGTCTTATGGAGTCGA
rs989531	chr2:173759125	ATATGCCACTTTTTTTCCAATTTTTAGCAACGGCTGGCCCCTTTGAGAAATAATTGTAGAG	ATATGCCACTTTTTTTCCAATTTTTAGCAATGGCTGGCCCCTTTGAGAAATAATTGTAGAG
rs3754748	chr2:173763731	TAAATATGGTCTAGTATGTATTCTCAACACCGACTGCTTTTTTGAACTTTCAAATCTTTTT	TAAATATGGTCTAGTATGTATTCTCAACACTGACTGCTTTTTTGAACTTTCAAATCTTTTT
rs384490	chr11:3035461	TAGCGCAATCATGACTTAAACACCTATTACAGGACGCTCAGTCTTTAGTGCTTGTCTCCCC	TAGCGCAATCATGACTTAAACACCTATTACCGGACGCTCAGTCTTTAGTGCTTGTCTCCCC
rs2288337	chr4:83653095	CGTTTTAGGATCTTTAAACAACAAAAGCAAAGCAAAAACAATGTTTTCCTTAAGATATGCA	CGTTTTAGGATCTTTAAACAACAAAAGCAATGCAAAAACAATGTTTTCCTTAAGATATGCA
rs6535340	chr4:83659380	TCCCATTGTGTGGGGCAGCTGCCCAGTGCCGGCAGAAGACAGGAAGGCTATAGGGTTACAG	TCCCATTGTGTGGGGCAGCTGCCCAGTGCCAGCAGAAGACAGGAAGGCTATAGGGTTACAG
rs9844736	chr3:52907011	GAGATCGTGATTCAGTAGTTCTGGGGTGGGTCCCAATAGTTTGCAGCCTGGATTATTCTGA	GAGATCGTGATTCAGTAGTTCTGGGGTGGGGCCCAATAGTTTGCAGCCTGGATTATTCTGA
rs11922975	chr3:52911803	ATCCTTGCTTACATAATATACGGGAGTCGGCGCTGGGGGATATAATTCTTTATGCAATTGC	ATCCTTGCTTACATAATATACGGGAGTCGGTGCTGGGGGATATAATTCTTTATGCAATTGC
rs7626551	chr3:52913132	TGCGTTACCCTCCAAAACATGTTTTCTGTGCTGTGCTTCTACACTGGAGACACCTGGAAAG	TGCGTTACCCTCCAAAACATGTTTTCTGTGGTGTGCTTCTACACTGGAGACACCTGGAAAG
rs2504033	chr1:176434676	TCTTCTCCCCATATCCCTGTATCCACTGTCGTCTTATCTTCCTCCTTGTTCCTCCTATCCC	TCTTCTCCCCATATCCCTGTATCCACTGTCTTCTTATCTTCCTCCTTGTTCCTCCTATCCC
rs2504034	chr1:176438764	ACTCATTAGATTGAATACGTTAAATAGGTGCAGTTTACATGGATGAGCTTGGAGGACATTA	ACTCATTAGATTGAATACGTTAAATAGGTGTAGTTTACATGGATGAGCTTGGAGGACATTA
rs1052447	chr1:176443306	TCAAGAGAAAGATGATCAGACCGGAACAGGTAAACGTTCCATATAGAGATGCTTCGGAAGT	TCAAGAGAAAGATGATCAGACCGGAACAGGGAAACGTTCCATATAGAGATGCTTCGGAAGT
rs2245702	chr1:176443482	AGAAACCTGAATGGTGCGCTAGATTTCTTGTCTGAAATCACCTTCTTTTAATGTCTTAAAA	AGAAACCTGAATGGTGCGCTAGATTTCTTGGCTGAAATCACCTTCTTTTAATGTCTTAAAA
rs2245610	chr1:176443880	CAAACACCCCTGCTTAGCTCCGCTGCCTTTTTGCCTAAGAAATGTAAACGCGGGAGGCGGG	CAAACACCCCTGCTTAGCTCCGCTGCCTTTGTGCCTAAGAAATGTAAACGCGGGAGGCGGG
rs2839075	chr21:46218432	CCAGTCCCCGGCATTGAGCCTTGTGTCTTTCCAGTTACAGGCGATGCTGCCGGAAACGTGT	CCAGTCCCCGGCATTGAGCCTTGTGTCTTTGCAGTTACAGGCGATGCTGCCGGAAACGTGT
rs896174	chr7:35508433	AGCCTGTACTCTTTACACATGTACCCCATGCCTTCTCCACCAAAGCTCCTGGCACCGTGCT	AGCCTGTACTCTTTACACATGTACCCCATGGCTTCTCCACCAAAGCTCCTGGCACCGTGCT
rs896173	chr7:35508777	AAAAGTTCGGCTATGGGCAATAGACTCAACCTTTTGTTCTATGTCTAACCTATAAAATAGA	AAAAGTTCGGCTATGGGCAATAGACTCAACTTTTTGTTCTATGTCTAACCTATAAAATAGA
rs1318183	chr7:35510026	GCAAGTTGTTGCTCCATGACTGGAAACAAAGAAGACTTCACTCTTTACTTCAGATGCGCAG	GCAAGTTGTTGCTCCATGACTGGAAACAAACAAGACTTCACTCTTTACTTCAGATGCGCAG
rs702842	chr7:35510325	GCCATTGTTCTCCTGTTTGTTGTTTCATGACTGAACTATGAGTGCTGTAGCTCTTCACGTT	GCCATTGTTCTCCTGTTTGTTGTTTCATGAGTGAACTATGAGTGCTGTAGCTCTTCACGTT
rs4720182	chr7:35514910	CTACATTCAAATAAAGTTAAGAAAATATCAGTAAATTGAAACAAACCTGGAGAAGAGTCAT	CTACATTCAAATAAAGTTAAGAAAATATCACTAAATTGAAACAAACCTGGAGAAGAGTCAT
rs4483064	chr7:35516325	AATCCATGGCATGCAGGGGCATTACAATTGGTCAGACTACTACCGTCTGTGGTTGATTGTG	AATCCATGGCATGCAGGGGCATTACAATTGATCAGACTACTACCGTCTGTGGTTGATTGTG
rs17171719	chr7:35517711	ATTTACATTAATATTTGTCTCAGTCACTATTATAAAGGACACAAAGGATAGTGAGATATAC	ATTTACATTAATATTTGTCTCAGTCACTATCATAAAGGACACAAAGGATAGTGAGATATAC
rs11191416	chr10:104594906	GGTCCCTGACTTCCTACAACACTAGCATCCTAGCAGTCATGGTGACAGTGACATTGAAGGT	GGTCCCTGACTTCCTACAACACTAGCATCCGAGCAGTCATGGTGACAGTGACATTGAAGGT
rs11209604	chr1:41296299	TGTATTAACAGTTTTTAATAAAGTAATCCACTTCCGAGATTCTATGCTAAGGAAAAATACT	TGTATTAACAGTTTTTAATAAAGTAATCCATTTCCGAGATTCTATGCTAAGGAAAAATACT
rs11802778	chr1:41304049	ATTTATCACTGAGATTAGCTAGAGGGCTACTGTTTGTTTTCCCATCAGCTCCCGAATGTAA	ATTTATCACTGAGATTAGCTAGAGGGCTACCGTTTGTTTTCCCATCAGCTCCCGAATGTAA
rs197509	chr6:143139048	CTTCCTGGATACAAAATAAATGCAGTTAGGGAAAATTGTTCCATTAAACCTTACCATCGAT	CTTCCTGGATACAAAATAAATGCAGTTAGGAAAAATTGTTCCATTAAACCTTACCATCGAT
rs13217908	chr6:143139262	AATATTATAAAAACATCATAGTAATATTTTCTAAGACATAAGATTATTATATATGAAACAT	AATATTATAAAAACATCATAGTAATATTTTGTAAGACATAAGATTATTATATATGAAACAT
rs197505	chr6:143140569	GAAGAGGAAAGAAAGGATTTTTACCTTCCATCTCATGACTTTCAGTAAGTTTAATTTTTGT	GAAGAGGAAAGAAAGGATTTTTACCTTCCACCTCATGACTTTCAGTAAGTTTAATTTTTGT
rs84578	chr6:143143255	TAGTGTTGGAGAGAAAAAGACATCCTCAAACATGTTTCAAATCAAATGTGAAAGTTCATGT	TAGTGTTGGAGAGAAAAAGACATCCTCAAATATGTTTCAAATCAAATGTGAAAGTTCATGT
rs126343	chr6:143143356	CGTCTCTTCTTGGAGTTTCTGAGACATATAAAGAAAGGTAGGTGGGAGAGAAAGTGAGCGA	CGTCTCTTCTTGGAGTTTCTGAGACATATAGAGAAAGGTAGGTGGGAGAGAAAGTGAGCGA
rs1654462	chr19:60269957	TCTCCCTCTCCCCCCAACTCTCTTTCCCTACACACATCTTAAGAGGCCTCAGCAGTGTAAG	TCTCCCTCTCCCCCCAACTCTCTTTCCCTATACACATCTTAAGAGGCCTCAGCAGTGTAAG
rs6579843	chr5:150606960	GTCTAATTGCCAGTCTTCCCCTGGAAACTTTCCTCTCCTCTGGACTGGTTCTATTAGAGGA	GTCTAATTGCCAGTCTTCCCCTGGAAACTTCCCTCTCCTCTGGACTGGTTCTATTAGAGGA
rs153482	chr5:150609389	AAATTGATCGCAATGGTGGAGGACGTAGCCGAGCGGGGAATCAGGTGGAATAGGTAGAGAG	AAATTGATCGCAATGGTGGAGGACGTAGCCAAGCGGGGAATCAGGTGGAATAGGTAGAGAG
rs838136	chr19:53948200	TCCGGCGGCAGCCTGGCAAACAGGTTCTCCATCCCCCAGGAGGACGCGGCAGAGGGCGGAC	TCCGGCGGCAGCCTGGCAAACAGGTTCTCCGTCCCCCAGGAGGACGCGGCAGAGGGCGGAC
rs2286529	chr17:56825624	CTGTTTGTGAACTCAACGTTTCCACGGCTTTTCCATTAAACTTTACCCCAAATCACACCTG	CTGTTTGTGAACTCAACGTTTCCACGGCTTCTCCATTAAACTTTACCCCAAATCACACCTG
rs2286528	chr17:56826154	CACATCCACGTGTCCTGGGGTGGTTTCAGAGGGGCTCATGCTTCCTAGGGCAGCTGAACCC	CACATCCACGTGTCCTGGGGTGGTTTCAGAAGGGCTCATGCTTCCTAGGGCAGCTGAACCC
rs2286527	chr17:56826468	CCAAGGCCTTTCTGATAACCTGAGCTCCAGTGGCAGCCGCTGTGGGGCCAGCTTATCTGGT	CCAAGGCCTTTCTGATAACCTGAGCTCCAGCGGCAGCCGCTGTGGGGCCAGCTTATCTGGT
rs2286526	chr17:56826839	CTCCCACCGGCCTCTTTCCAGATCATGAAGGTATTTTTCCTTCATCAAATTGAGAGGAAGT	CTCCCACCGGCCTCTTTCCAGATCATGAAGATATTTTTCCTTCATCAAATTGAGAGGAAGT
rs2286525	chr17:56826905	GCCTCAGGCCCACCGTGCCTTTTCTCATCTCAGACAGTACTCTTGCTCCTTCAGTTGCCAC	GCCTCAGGCCCACCGTGCCTTTTCTCATCTTAGACAGTACTCTTGCTCCTTCAGTTGCCAC
rs3744449	chr17:56828662	CGCGGTCCCAGGTCTGGTTGGGGTGGGGGCCGCGGCCTCGGTGACCCCAGCCCGCAGCGGC	CGCGGTCCCAGGTCTGGTTGGGGTGGGGGCTGCGGCCTCGGTGACCCCAGCCCGCAGCGGC
rs1476781	chr17:56831197	CCTGAGCTTTCCAGCGGCCGGGAGGAGCGGATCCTCGGGGCCAGGAAGGTGAGCGCACCTT	CCTGAGCTTTCCAGCGGCCGGGAGGAGCGGGTCCTCGGGGCCAGGAAGGTGAGCGCACCTT
rs2015400	chr21:46133051	GTCCACGTGTGGAACATGTTTATTCATTTCAGCTTCACTCAAAACCCACCAGGGATTTAAG	GTCCACGTGTGGAACATGTTTATTCATTTCGGCTTCACTCAAAACCCACCAGGGATTTAAG
rs2839036	chr21:46134021	TCCCTAGCTTGGGGACCTTTGAACAATTCCTGAGTCTCCCTGCCATGGCTCTTGTGGCAGT	TCCCTAGCTTGGGGACCTTTGAACAATTCCCGAGTCTCCCTGCCATGGCTCTTGTGGCAGT
rs2839037	chr21:46136891	CGTCTCTCGCGGGGCTTCATGTACCAGACCGTGTTCATGTTCACACCTGGGAGGAGGGGAA	CGTCTCTCGCGGGGCTTCATGTACCAGACCATGTTCATGTTCACACCTGGGAGGAGGGGAA
rs1033366	chr21:46138537	CCAGCGAGCTGCAGCCTGTGCCTCTCTTCATTGCAAGGGCAGCATGAGTGAGAGGCCATCC	CCAGCGAGCTGCAGCCTGTGCCTCTCTTCACTGCAAGGGCAGCATGAGTGAGAGGCCATCC
rs6695775	chr1:7626033	CGGCAGATCCTGGGAGACCTGAGCAGCAGGCGCCCGCGTGCCCTGGCCCTTCTCAGGGAGC	CGGCAGATCCTGGGAGACCTGAGCAGCAGGTGCCCGCGTGCCCTGGCCCTTCTCAGGGAGC
rs12144301	chr1:7626276	CCCAGCTACCTGGGGCAGCCAGAAGGTGGGTGAGAGGATTTTGCTCAGTCCTGCAGCCTAG	CCCAGCTACCTGGGGCAGCCAGAAGGTGGGCGAGAGGATTTTGCTCAGTCCTGCAGCCTAG
rs6665806	chr1:7627021	CCGAGGCCAGGGCGGTGGGACCCTGCTGCCTGACACCCATTGGCCCAGGATCCACCCCTGG	CCGAGGCCAGGGCGGTGGGACCCTGCTGCCCGACACCCATTGGCCCAGGATCCACCCCTGG
rs5958193	chrX:122034922	GGAACTGTTTGTACCTCCCTAGAGGAAGCCACCTCATTTCCTGTGGACCCTGCAGGGTCCT	GGAACTGTTTGTACCTCCCTAGAGGAAGCCGCCTCATTTCCTGTGGACCCTGCAGGGTCCT
rs5958194	chrX:122037275	CTTTCTTGGGCCAACAAATTAGCTGCTGCATGTTCTTCTCATGGCACTGACAGAGCTGAAG	CTTTCTTGGGCCAACAAATTAGCTGCTGCACGTTCTTCTCATGGCACTGACAGAGCTGAAG
rs2353720	chrX:122037937	TAAAATGGTATACATTAATAAAAATGTCAAGAATATTATCTCTGGGAGGTAACCTGGAATA	TAAAATGGTATACATTAATAAAAATGTCAACAATATTATCTCTGGGAGGTAACCTGGAATA
rs3761555	chrX:122041972	CATAATTTCCTCCCACCCACCACTCATAGAAATCTTTTGTCTCCATTTTGATATTTCATGG	CATAATTTCCTCCCACCCACCACTCATAGAGATCTTTTGTCTCCATTTTGATATTTCATGG
rs334782	chr3:3123458	TTAGTGCAAAATCAGAGCATATTTAATATTATTTCAGGAAATGCTGACATTTTAAGAAATC	TTAGTGCAAAATCAGAGCATATTTAATATTGTTTCAGGAAATGCTGACATTTTAAGAAATC
rs3792421	chr3:3124791	CAGGATAAAAGAGAAAGTAAACTCTTCATATTTAAAAGCCTACCAGAGCATGAATCCTCTC	CAGGATAAAAGAGAAAGTAAACTCTTCATACTTAAAAGCCTACCAGAGCATGAATCCTCTC
rs162879	chr3:3125202	ATATTTCCTGCCAATTGCACATGGTGCAATTTGTCATCTCACATCCATGCTCCTGGGCGTA	ATATTTCCTGCCAATTGCACATGGTGCAATCTGTCATCTCACATCCATGCTCCTGGGCGTA
rs2290608	chr3:3126759	CCATCCCATCATGAAGGAAGCTGCCTGAGAGTTTTTAACCATTACAGCCGTGATGATGAAA	CCATCCCATCATGAAGGAAGCTGCCTGAGAATTTTTAACCATTACAGCCGTGATGATGAAA
rs334787	chr3:3127569	TCCAAAGGCAACTACTTACTACTCTCTGCCGTGGGTCATACAATAAGCACTACTCTTATCT	TCCAAAGGCAACTACTTACTACTCTCTGCCTTGGGTCATACAATAAGCACTACTCTTATCT
rs334788	chr3:3128069	CTTCCCAATGATTAATAAGTATTTTTAAGGTTTCATTAGTGACAAATATGTTACATGTATA	CTTCCCAATGATTAATAAGTATTTTTAAGGCTTCATTAGTGACAAATATGTTACATGTATA
rs334790	chr3:3128520	CAGATCTAATTTTCTTTATACCCTTCACCGCGCCTAGCATAGTGCATAGGTGCATTCAATG	CAGATCTAATTTTCTTTATACCCTTCACCGTGCCTAGCATAGTGCATAGGTGCATTCAATG
rs771958	chr3:3129083	CCAGCATGTTCTATCATACTGTCTTTGGACGTTTACACTTTATTATAAAGAATTAAATTAT	CCAGCATGTTCTATCATACTGTCTTTGGACATTTACACTTTATTATAAAGAATTAAATTAT
rs334792	chr3:3129893	GTAGCAATAGCTGACTAATACACCTACCACTTAGAGATAACTATTCCTGTTAGTCTGATCT	GTAGCAATAGCTGACTAATACACCTACCACCTAGAGATAACTATTCCTGTTAGTCTGATCT
rs334793	chr3:3129931	CACAGTTTACCACTGAGGGTTCTGTGGTTGCTTGTTCTGTAGCAATAGCTGACTAATACAC	CACAGTTTACCACTGAGGGTTCTGTGGTTGTTTGTTCTGTAGCAATAGCTGACTAATACAC
rs334794	chr3:3129942	TACATGCCTATCACAGTTTACCACTGAGGGTTCTGTGGTTGCTTGTTCTGTAGCAATAGCT	TACATGCCTATCACAGTTTACCACTGAGGGATCTGTGGTTGCTTGTTCTGTAGCAATAGCT
rs17026903	chr3:3130047	TTGGGCTGGGATCCAGATCACAAAGTGAGTTCAGATTTGTTCCAAGTATCTGCCATTCATT	TTGGGCTGGGATCCAGATCACAAAGTGAGTGCAGATTTGTTCCAAGTATCTGCCATTCATT
rs4968563	chr17:56879255	GGGAAGCTGACCTTCTAGAGAAAATCCACCAAAGAAAAAGGTCTCTGGATCAGGAGGTCTA	GGGAAGCTGACCTTCTAGAGAAAATCCACCCAAGAAAAAGGTCTCTGGATCAGGAGGTCTA
rs9902847	chr17:56880903	TGTCTCTGAGATTGATTATTTAGGTGATTAATTACTCAGCTTGCAGGTCATTCATTAATGA	TGTCTCTGAGATTGATTATTTAGGTGATTAGTTACTCAGCTTGCAGGTCATTCATTAATGA
rs1468566	chr17:56882992	CTCAAGTCCCTATCACCATTGCAGTACCAGGTCCCACCACCCTATCACCATTCCTCTCATG	CTCAAGTCCCTATCACCATTGCAGTACCAGATCCCACCACCCTATCACCATTCCTCTCATG
rs3760368	chr17:56887646	CTGCTCCCTGCCCGAAGCAGGTCCTGGGGCCTCGGGATGAGAGCACAGCCTGAGAGGCCAG	CTGCTCCCTGCCCGAAGCAGGTCCTGGGGCGTCGGGATGAGAGCACAGCCTGAGAGGCCAG
rs11867179	chr17:56888135	TGAGCTGGGCCTGAGGTCCTGAGGCCCTCTCTGCACACAGGTGTGGAGCTGCAGGAGCCTG	TGAGCTGGGCCTGAGGTCCTGAGGCCCTCTGTGCACACAGGTGTGGAGCTGCAGGAGCCTG
rs5906428	chrX:47172111	TCAACTCCCCCGAAATGAACAGCTGAGAGGACGGCGGTGGGAGGGGGTCCCAGAGATGGCG	TCAACTCCCCCGAAATGAACAGCTGAGAGGGCGGCGGTGGGAGGGGGTCCCAGAGATGGCG
rs2187804	chrX:47176233	AGGTGAAGAGGGAAGTGCGGACCTGGAAGGGAGCACGATGCCAGTCAATGTGTGGAGGTAT	AGGTGAAGAGGGAAGTGCGGACCTGGAAGGTAGCACGATGCCAGTCAATGTGTGGAGGTAT
rs7517566	chr1:147663108	GAGATATTGCCAGCCAAAATTGGAGGCAATAGATGAAGAAAGTAATTTGAGAATGGGTAAC	GAGATATTGCCAGCCAAAATTGGAGGCAATGGATGAAGAAAGTAATTTGAGAATGGGTAAC
rs2765814	chrX:47249469	GCCTGTCTCATTCAGTCAATATTGCCAATAGTTTCTCTCACCAGTCAGTTCCTTACATACA	GCCTGTCTCATTCAGTCAATATTGCCAATATTTTCTCTCACCAGTCAGTTCCTTACATACA
rs1999715	chr1:110162004	ATTTCTTTCTCTTTCCTTTTCTTTCTTTTTGCTATTCCTTCTCTCTTCCTTTCTCCCTTCC	ATTTCTTTCTCTTTCCTTTTCTTTCTTTTTTCTATTCCTTCTCTCTTCCTTTCTCCCTTCC
rs1999714	chr1:110162075	CTTCCCCCTCCCTTTCTTCTTTTTTCTTTCCTACTTTCCTTTTCTTTCTTTTGTTCTCCCT	CTTCCCCCTCCCTTTCTTCTTTTTTCTTTCATACTTTCCTTTTCTTTCTTTTGTTCTCCCT
rs1999713	chr1:110162219	TGTCATTTCCTTGAAACTATTTGACAGCCAATTTCCCCTTGAGATCTTTTCTAGGGAATGG	TGTCATTTCCTTGAAACTATTTGACAGCCAGTTTCCCCTTGAGATCTTTTCTAGGGAATGG
rs3093057	chr1:110162379	TGGCAAATAGCATCTCTCCTATGCTCCCTTCTACTCTCCTCTGGGGTCAGCTGAGCACTGC	TGGCAAATAGCATCTCTCCTATGCTCCCTTTTACTCTCCTCTGGGGTCAGCTGAGCACTGC
rs3093056	chr1:110162490	GCTTCCAATTCCCCTATACCTGTCCCAGAACCTGGCCTGGGACATGACTTCACTGGTAGCA	GCTTCCAATTCCCCTATACCTGTCCCAGAAACTGGCCTGGGACATGACTTCACTGGTAGCA
rs3093055	chr1:110162922	GAGAGAAGAACATCAGCTCCAGGGCAGGAGCAAGTGGAGGAGACTCAGGTGAGTCACTTC	GAGAGAAGAACATCAGCTCCAGGGCAGGAGAAAGTGGAGGAGACTCAGGTGAGTCACTTC
rs3093054	chr1:110163005	CCTCAATTTCCCTGTGTCTGGTGACAAAAAGTGTCCACATCAAGCAGATCCACAATCCCT	CCTCAATTTCCCTGTGTCTGGTGACAAAAACTGTCCACATCAAGCAGATCCACAATCCCT
rs7535558	chr1:110163160	AGAGCCTCCCAGAGCCCCACAGTCTACATGTCCAAAGAGCTTTCATAACTGAACCCCTAC	AGAGCCTCCCAGAGCCCCACAGTCTACATGCCCAAAGAGCTTTCATAACTGAACCCCTAC
rs333950	chr1:110163232	TTTCCCCAAAGGAGTGGTCATGAGGTCAAATGGGCTGACATATGGGAGTCCCTAGGGCCA	TTTCCCCAAAGGAGTGGTCATGAGGTCAAACGGGCTGACATATGGGAGTCCCTAGGGCCA
rs7530596	chr1:110163247	CCCATATGTCAGCCCATTTGACCTCATGACCACTCCTTTGGGGAAAGTCTTAAAATTGCC	CCCATATGTCAGCCCATTTGACCTCATGACAACTCCTTTGGGGAAAGTCTTAAAATTGCC
rs333951	chr1:110163732	GCATTTGGACTTTGCTCAGCTTCTGGAGGAACGTAATCATTCTCCACGTTGGTGCAAGGC	GCATTTGGACTTTGCTCAGCTTCTGGAGGAGCGTAATCATTCTCCACGTTGGTGCAAGGC
rs9527	chr10:104613568	AAGAAATTCTAGGAATGCAGGTCAAGGCAAGAGGCTGCAGCTGGCCTGATAATGATACCAC	AAGAAATTCTAGGAATGCAGGTCAAGGCAAAAGGCTGCAGCTGGCCTGATAATGATACCAC
rs4917985	chr10:104614062	ATATGGATATTAACTTAAGGTAAAAAAGCTGGATGTGAAGGATCTGAAAAGGCATTAATTT	ATATGGATATTAACTTAAGGTAAAAAAGCTAGATGTGAAGGATCTGAAAAGGCATTAATTT
rs4919691	chr10:104614465	AATACATGAAACAAAAGTAGCCAGAAATGTTAGAACAGGTGGAAATGTATACATTATTTGA	AATACATGAAACAAAAGTAGCCAGAAATGTGAGAACAGGTGGAAATGTATACATTATTTGA
rs837980	chr10:104616470	TCGGCCTCCCAAAGTGCTGGGATTACAGGCGTGAGCCACCACGCCCAGCCTCACAAAAGCT	TCGGCCTCCCAAAGTGCTGGGATTACAGGCATGAGCCACCACGCCCAGCCTCACAAAAGCT
rs7085104	chr10:104618863	CTCCGTTTTGGTGATGTATATACGTTTGCCAGAGTTCACAGAACTGCACACTGAAGAAAGA	CTCCGTTTTGGTGATGTATATACGTTTGCCGGAGTTCACAGAACTGCACACTGAAGAAAGA
rs3740400	chr10:104619455	AGTAAAGGGCAGGCAGCGGGCCGAGGGGTGAGGGGAGGACAAAGGTCTCGAGACACAGCTC	AGTAAAGGGCAGGCAGCGGGCCGAGGGGTGCGGGGAGGACAAAGGTCTCGAGACACAGCTC
rs12522528	chr5:172184087	GCTGTACCCTAGAAGTAGGGGTGAAATAAAAGCAAACTAGTCCTGAGCTTCAGGTCATCTG	GCTGTACCCTAGAAGTAGGGGTGAAATAAACGCAAACTAGTCCTGAGCTTCAGGTCATCTG
rs6891132	chr5:172184437	GTTTAAGGAGATTAAAAGTCATGCCTGAAAATTCTGTAAGGAGACTGGAAACTATACAAAG	GTTTAAGGAGATTAAAAGTCATGCCTGAAAGTTCTGTAAGGAGACTGGAAACTATACAAAG
rs11748400	chr5:172186199	CCAAGAAGGCCTGTACTTTTTCTTTGCTTTTTATGCCTCCTGTGTGGGTCTGTCTGCCAAA	CCAAGAAGGCCTGTACTTTTTCTTTGCTTTGTATGCCTCCTGTGTGGGTCTGTCTGCCAAA
rs4868217	chr5:172186389	TAAAATGCTTCAGGGCCTCTAACTGCCTACTAGAGAAAGTTCACATTTTTAACACAGCCCT	TAAAATGCTTCAGGGCCTCTAACTGCCTACCAGAGAAAGTTCACATTTTTAACACAGCCCT
rs6556047	chr5:172188455	AGAGTTGTTTCTCCAGAGACCTACCTGCTATGAGATCTAAGTTACACTAAAGTCCTCTCTG	AGAGTTGTTTCTCCAGAGACCTACCTGCTAAGAGATCTAAGTTACACTAAAGTCCTCTCTG
rs1564259	chr5:172188630	CACTCCCTTCCACCCACTCCCGTCCAAAACATCACCAAAAGTTGTTTTAAGCAGAGAATGG	CACTCCCTTCCACCCACTCCCGTCCAAAACGTCACCAAAAGTTGTTTTAAGCAGAGAATGG
rs1006721	chr5:172188677	ACAAATGAATGTTCTATAACACCGAATGTTCTCTGAATCCAAATGTTCACTCCCTTCCACC	ACAAATGAATGTTCTATAACACCGAATGTTTTCTGAATCCAAATGTTCACTCCCTTCCACC
rs2339652	chr5:172190305	AGGTCACCCAGCAGAGAGTGATCTGAGTCCAAAGTGGTTTTCTATTTCCCCAGGCTGGCGG	AGGTCACCCAGCAGAGAGTGATCTGAGTCCGAAGTGGTTTTCTATTTCCCCAGGCTGGCGG
rs2127105	chr5:172192840	ATAGAGGGGAACAGCAGTGCTGGTTCCTCCGGGAGGATTCAGAAGGGACAACACTAGCACG	ATAGAGGGGAACAGCAGTGCTGGTTCCTCCAGGAGGATTCAGAAGGGACAACACTAGCACG
rs899356	chr5:172193475	AGGTCGGCCATCCTAGGCTGTTAAGGTGGACTCACCTCTGCCCCTGCCGTGTCTCTCTGGG	AGGTCGGCCATCCTAGGCTGTTAAGGTGGATTCACCTCTGCCCCTGCCGTGTCTCTCTGGG
rs1556887	chr9:126966592	AAATAAAACCAAGTCTCAACACTGTCTTGCTCAAAACCTTTCAGTGGCTCCTTACTGTCTT	AAATAAAACCAAGTCTCAACACTGTCTTGCCCAAAACCTTTCAGTGGCTCCTTACTGTCTT
rs7219773	chr17:7223868	GTGGAGCTACAGAACCTCTAACAGGGATCGCAGATGTGCAGTAACAATTATAGTGTGATGA	GTGGAGCTACAGAACCTCTAACAGGGATCGAAGATGTGCAGTAACAATTATAGTGTGATGA
rs12311887	chr12:12754655	CCAACCTGGCCATATGATTAATGGCACATTTGTAAATATGGATAGGTGTCAGAGAGCCCCA	CCAACCTGGCCATATGATTAATGGCACATTCGTAAATATGGATAGGTGTCAGAGAGCCCCA
rs11055027	chr12:12758748	GGCTTATGGGACGCTTCTCAGCCCTAAGTAGGAAAACAGCAGTGAAAATGGCAACCAAAAC	GGCTTATGGGACGCTTCTCAGCCCTAAGTACGAAAACAGCAGTGAAAATGGCAACCAAAAC
rs3759216	chr12:12759353	GTCTCCATTTACATACATGTGGTAGTTTGGGTGTTTATGCATATGGATAGATGCACATATA	GTCTCCATTTACATACATGTGGTAGTTTGGATGTTTATGCATATGGATAGATGCACATATA
rs3759217	chr12:12759719	CTAGTGGATGGTGATACCACAGGCTCAAGACAGCTGCATTTAAATATCAGTGACCACAGGC	CTAGTGGATGGTGATACCACAGGCTCAAGATAGCTGCATTTAAATATCAGTGACCACAGGC
rs3826511	chr17:7179049	TCACAAGGCCACGGAGAGCTCCCTGATGGCAACAATGACAACATTGCAGCCTGTTGAGGGC	TCACAAGGCCACGGAGAGCTCCCTGATGGCGACAATGACAACATTGCAGCCTGTTGAGGGC
rs3809826	chr17:7179242	TGGACAGGCGAGGAACCAGGGAGACTCAGAGGCGGTTGGGACCCCCTCCAGCTTGGCACCA	TGGACAGGCGAGGAACCAGGGAGACTCAGAAGCGGTTGGGACCCCCTCCAGCTTGGCACCA
rs290391	chr20:52120593	CTGGGTGGAGTCCTCCCTTCTCCCCGGACCATCCTGCAGAAACAGGTTCTCTTCCTGATGT	CTGGGTGGAGTCCTCCCTTCTCCCCGGACCGTCCTGCAGAAACAGGTTCTCTTCCTGATGT
rs290392	chr20:52121134	ACAATAGATTATGAGAGCATGAAATAACATGTAACAAAAGAAGATTGAAGAACAAAATTTG	ACAATAGATTATGAGAGCATGAAATAACATATAACAAAAGAAGATTGAAGAACAAAATTTG
rs11699339	chr20:52121713	CGATTCCAGCTCAGCACTGTACATGTCAATCTGGAATGTAGTAAACCCAATTATTAAGCAG	CGATTCCAGCTCAGCACTGTACATGTCAATTTGGAATGTAGTAAACCCAATTATTAAGCAG
rs290393	chr20:52121858	CGGATCTTGATTCTTACTGATCGGCTGTGGAATTATGAGCAAGCTACTGTACTTCCCTAAG	CGGATCTTGATTCTTACTGATCGGCTGTGGGATTATGAGCAAGCTACTGTACTTCCCTAAG
rs6064043	chr20:52123865	GAATGTGCTGCCTTTTTTCTGTATTGAAGATAATTTCTGATTTGCGTGGAAAGCCTGGACT	GAATGTGCTGCCTTTTTTCTGTATTGAAGAGAATTTCTGATTTGCGTGGAAAGCCTGGACT
rs383469	chr20:52124310	AGGAAGAAAACCTTTATGATGATCCATGTCTACTTAATGAATAGTAAATATATTTTCTCTT	AGGAAGAAAACCTTTATGATGATCCATGTCCACTTAATGAATAGTAAATATATTTTCTCTT
rs392236	chr20:52124650	CAGCTGTGTTAAGATTTTCAATATGGCAACTGTAGAGCAATAAACCAAGCTCAGGGCCCTG	CAGCTGTGTTAAGATTTTCAATATGGCAACCGTAGAGCAATAAACCAAGCTCAGGGCCCTG
rs1399251	chr4:71285764	TAGATATTCTTCCCACTCAATGTTGTAGCAGCTCTTGGCTTGGTGATTCATTTTTCTGGCT	TAGATATTCTTCCCACTCAATGTTGTAGCAACTCTTGGCTTGGTGATTCATTTTTCTGGCT
rs2249813	chr4:71286777	CTTATGTACCCACAATAGCCTCTTACCCAGTCCCAGTGTGTGAATGGTGGTATGAATATAC	CTTATGTACCCACAATAGCCTCTTACCCAGCCCCAGTGTGTGAATGGTGGTATGAATATAC
rs1842479	chr4:71287439	GTAAACATGTTTTTATCTTGGTGGGAGAAAAGATTACTAGCACTCTCAGATGTTCTTAAAA	GTAAACATGTTTTTATCTTGGTGGGAGAAATGATTACTAGCACTCTCAGATGTTCTTAAAA
rs17678046	chr2:74962387	TACCAGTAGGTCCTTTTCTTAATTTACTTCAATTTTGTGTGTGTGTATGTGAAGAGATAAT	TACCAGTAGGTCCTTTTCTTAATTTACTTCCATTTTGTGTGTGTGTATGTGAAGAGATAAT
rs17678088	chr2:74963478	AAAAAAAAAGAAAAAGAAAAAAGAAAAATCGGATTGCTGGGTTAAAGGACAGGTGTACTTA	AAAAAAAAAGAAAAAGAAAAAAGAAAAATCAGATTGCTGGGTTAAAGGACAGGTGTACTTA
rs6746896	chr2:96832823	CCTAGTGGTCCCCTTTTTCTCTGTGGAATCATCTATCTCCCACGATCTAGGGCTGCACAAC	CCTAGTGGTCCCCTTTTTCTCTGTGGAATCGTCTATCTCCCACGATCTAGGGCTGCACAAC
rs2314398	chr2:96835362	TGGCAGAGCTCCCACAATTCAGCAATGCCTCTGGGGATCCAGATGCTTGCTTCCCACAGAG	TGGCAGAGCTCCCACAATTCAGCAATGCCTGTGGGGATCCAGATGCTTGCTTCCCACAGAG
rs33445	chr5:52317671	GAAAATGGGAAAGGCTGGGCTAATAATATAGAATTTGACTGGAGCCTTGAAGTAGAATTTG	GAAAATGGGAAAGGCTGGGCTAATAATATAAAATTTGACTGGAGCCTTGAAGTAGAATTTG
rs33446	chr5:52317788	TGAAGAATGGGAAAGGCAGGCCAGTGAACTCGTGAATTTGGCCTAAACATAGTGTGCAAGA	TGAAGAATGGGAAAGGCAGGCCAGTGAACTGGTGAATTTGGCCTAAACATAGTGTGCAAGA
rs26679	chr5:52319932	ACTCCTTAAGCTTGATTTATGAAAACAGTTCGTTCCTTCACAAAAGTAGTCACTGGAAGAA	ACTCCTTAAGCTTGATTTATGAAAACAGTTGGTTCCTTCACAAAAGTAGTCACTGGAAGAA
rs26680	chr5:52320143	AATGGAAGAAAATGGTCACAGTCTATGTCATGGTGTAATGTAGACAGGGAGAGTCACAAGT	AATGGAAGAAAATGGTCACAGTCTATGTCACGGTGTAATGTAGACAGGGAGAGTCACAAGT
rs28095	chr5:52320874	CCGGTGTTTGCGGAATCAGGAGGGGCGGGCTGGGGCGGGCCCTCGGCGCTGCAGGAGCTGC	CCGGTGTTTGCGGAATCAGGAGGGGCGGGCCGGGGCGGGCCCTCGGCGCTGCAGGAGCTGC
rs7204501	chr16:14183556	GCAGGTCTCCTCCATCTCTCCCTAATTCATTCCAAAAGGCATTGTGTGGAGCTGAGCTAGG	GCAGGTCTCCTCCATCTCTCCCTAATTCATCCCAAAAGGCATTGTGTGGAGCTGAGCTAGG
rs2187664	chr16:14184379	GCCATCATAGTGATAAATAATTTAGCCAAACACACCAATGGATTGTTCTCAAAGCACCTTC	GCCATCATAGTGATAAATAATTTAGCCAAATACACCAATGGATTGTTCTCAAAGCACCTTC
rs756472	chr16:14186982	GCTTTAATTCATTCACTCAACCATGCTACAGATGTTTATTGAGAACACCTAATATTCCAAG	GCTTTAATTCATTCACTCAACCATGCTACAAATGTTTATTGAGAACACCTAATATTCCAAG
rs6792578	chr3:52979644	GAAGAGAGCTGCTACAGGAAGGCATGGCATGAACTAACTGCAAGAGCGACAATACAGAAAA	GAAGAGAGCTGCTACAGGAAGGCATGGCATAAACTAACTGCAAGAGCGACAATACAGAAAA
rs6768844	chr3:52979660	GGAAGGCATGGCATGAACTAACTGCAAGAGCGACAATACAGAAAACTATAGCATTGGGATG	GGAAGGCATGGCATGAACTAACTGCAAGAGTGACAATACAGAAAACTATAGCATTGGGATG
rs9846976	chr3:52983035	TGCCCTTTCTTTTCAAGGCTAAGATAAACATTGATTAAGATGAGTGATTACATGGGGAAGT	TGCCCTTTCTTTTCAAGGCTAAGATAAACACTGATTAAGATGAGTGATTACATGGGGAAGT
rs11706035	chr3:52986908	GGCAGGGCAAAAGGGAGTGTTTCTTTTAACAGTATTGGGTAAACTTTTTAAGATAAAAATG	GGCAGGGCAAAAGGGAGTGTTTCTTTTAACTGTATTGGGTAAACTTTTTAAGATAAAAATG
rs10471372	chr5:52443889	AATGTAGGAGCATCTCAGACCTTCACAGAACGCTCTGTTAGAAGATGAGAAACATAACGTT	AATGTAGGAGCATCTCAGACCTTCACAGAATGCTCTGTTAGAAGATGAGAAACATAACGTT
rs10940291	chr5:52445016	GAGCCTATTTTTTTCCGTAAAATCCAACCTATTCATCCATTTATACAGATTTTTTAAAATC	GAGCCTATTTTTTTCCGTAAAATCCAACCTGTTCATCCATTTATACAGATTTTTTAAAATC
rs10052267	chr5:52446829	CATTCACCTTAAAATGAAAGAACATGGCTATAGGAGCTTTTTGCAAATATGTTCTTCACTG	CATTCACCTTAAAATGAAAGAACATGGCTACAGGAGCTTTTTGCAAATATGTTCTTCACTG
rs10044163	chr5:52447564	TAGTCTTAACAGTGCTCGGTAAGGAAGCCACATCTACCTTTTATTAGCCTTTCAGCTCTGG	TAGTCTTAACAGTGCTCGGTAAGGAAGCCAGATCTACCTTTTATTAGCCTTTCAGCTCTGG
rs16880902	chr5:52448188	TGAGAAACAGCCCAGTTTGGCTAATGGAGGATGTCTTCCAAGTCTATTCTCACCCTACCCC	TGAGAAACAGCCCAGTTTGGCTAATGGAGGTTGTCTTCCAAGTCTATTCTCACCCTACCCC
rs6672616	chr1:16312928	TGCCATTCACATATTTCATAGAAAAAAAGATGTAGCAAATGGGTCAGGGTTGTACCAAAAA	TGCCATTCACATATTTCATAGAAAAAAAGACGTAGCAAATGGGTCAGGGTTGTACCAAAAA
rs221025	chr1:16314626	ACCCATTGCTTCAGGCTTGGTCCCTCCGCCGTCAGTAATGTCCAGCTTCACTCAGGCCGCT	ACCCATTGCTTCAGGCTTGGTCCCTCCGCCTTCAGTAATGTCCAGCTTCACTCAGGCCGCT
rs964042	chr1:16314969	CTCAGATGTAATGGGAAAGGAGCTCCCGAGTGGAATCCGTAGTGGGAAGACAACACTTAGG	CTCAGATGTAATGGGAAAGGAGCTCCCGAGCGGAATCCGTAGTGGGAAGACAACACTTAGG
rs964041	chr1:16315066	CAGGGTCTTGATAAGCCTATAAGCCGCAGCAGCCAGTGGTCAGGGCTGAGGACAATGGAGG	CAGGGTCTTGATAAGCCTATAAGCCGCAGCTGCCAGTGGTCAGGGCTGAGGACAATGGAGG
rs2819358	chr1:198708059	AGGGTTGGAAGAAATATTTAGTGTGTTTCATTTGCCTTTCTTAAATACAGGGCACCCCTGA	AGGGTTGGAAGAAATATTTAGTGTGTTTCAGTTGCCTTTCTTAAATACAGGGCACCCCTGA
rs2735784	chr1:198708137	GCTCTGCTCTGTCCTCGGATTTAGGTTATCGAACAGGCTTCCTCCCTCCCCTGCACAAGGG	GCTCTGCTCTGTCCTCGGATTTAGGTTATCAAACAGGCTTCCTCCCTCCCCTGCACAAGGG
rs4503988	chr2:241482544	GAAGCAGATATTTTAACAATTCTAACTGGAAATTTTAAAAAATAATAAGCATAGTTCACAT	GAAGCAGATATTTTAACAATTCTAACTGGAGATTTTAAAAAATAATAAGCATAGTTCACAT
rs4499423	chr2:241483158	TTCAGATCCTGAGGCAGGTCTGAGGCCTGCAAAAGAGACAGGGAAGGAAGGGGCTTGGGTA	TTCAGATCCTGAGGCAGGTCTGAGGCCTGCGAAAGAGACAGGGAAGGAAGGGGCTTGGGTA
rs12329123	chr2:241485862	GACCTCTTCTGCAGCTGGAATAAAAGCTGTGCCAACCTCATACAGCAGTGGTAAGGATTCG	GACCTCTTCTGCAGCTGGAATAAAAGCTGTACCAACCTCATACAGCAGTGGTAAGGATTCG
rs4234121	chr2:241489271	AAATCCCTGCATCTTCATAATTGTGGAAATAATTTTCCCAGTGTGGGGCTGGGATTTCCAT	AAATCCCTGCATCTTCATAATTGTGGAAATCATTTTCCCAGTGTGGGGCTGGGATTTCCAT
rs5949232	chrX:23922944	GTAGCATTTTGTCCTTCCATCTTGAGGCATGTTTCTGGTTTTCTCTCTGCTTAGCAGCCAC	GTAGCATTTTGTCCTTCCATCTTGAGGCATATTTCTGGTTTTCTCTCTGCTTAGCAGCCAC
rs6526373	chrX:23925854	TGGGCACACAAGCTATTTCTCATTTTTTTTTATTGAAACAACATTGCTTAGTTTCATTTAC	TGGGCACACAAGCTATTTCTCATTTTTTTTGATTGAAACAACATTGCTTAGTTTCATTTAC
rs3761639	chrX:23926506	GCCCAATTGGGTATGGATTTTTTTTTTTTTAAACACACTGCTTAAACAAGCCTTTTGAAGT	GCCCAATTGGGTATGGATTTTTTTTTTTTTTAACACACTGCTTAAACAAGCCTTTTGAAGT
rs6861680	chr5:161201945	AGTTATGTCTGGAGATATTTATGTACAGCCGTAATAAAAGTGCATCTATATCCATAAATTT	AGTTATGTCTGGAGATATTTATGTACAGCCATAATAAAAGTGCATCTATATCCATAAATTT
rs4596421	chr5:161202473	CTTTAACAATGAAAAACATAAGTAAACATACATTCTTATGGTTTAAAAGGAGTTTACACAT	CTTTAACAATGAAAAACATAAGTAAACATATATTCTTATGGTTTAAAAGGAGTTTACACAT
rs3754440	chr1:110325716	CATCCCAGGCTGATGTCCAGAGTCCAGGCCCAAAAGTGTTTGGGGGGGATGCCCACACGGC	CATCCCAGGCTGATGTCCAGAGTCCAGGCCTAAAAGTGTTTGGGGGGGATGCCCACACGGC
rs3768469	chr1:110326442	ATCCATGGGAAGTGAGCAGGGTCCTCGGGTCCTTGGGTATTTCTCCCCAGATCTTAGGTAG	ATCCATGGGAAGTGAGCAGGGTCCTCGGGTTCTTGGGTATTTCTCCCCAGATCTTAGGTAG
rs3754439	chr1:110327136	CATTTTCCTGGGTGATATTTTCATCCTCCATAGTAAACTTCTTGATAACTGTTGAATAGAA	CATTTTCCTGGGTGATATTTTCATCCTCCACAGTAAACTTCTTGATAACTGTTGAATAGAA
rs1390954	chr1:110327710	GTGTAAACTTTTATCTATCTGTATGTGGTCCGGAAAGAGTTTGATGGAGCAGGTGCATAGA	GTGTAAACTTTTATCTATCTGTATGTGGTCTGGAAAGAGTTTGATGGAGCAGGTGCATAGA
rs11102051	chr1:110328647	TTGTCCATGGAGTAAGAGATGAGTGGATGGCGAGATCCAGATAATTCCAGGCCCTGTAATG	TTGTCCATGGAGTAAGAGATGAGTGGATGGTGAGATCCAGATAATTCCAGGCCCTGTAATG
rs4838890	chr1:110328721	AAACCCCTCTCCATCTGCTAAGAAGAGCTACGTTTTAAATGGAAATGATACTTACTAGCTG	AAACCCCTCTCCATCTGCTAAGAAGAGCTATGTTTTAAATGGAAATGATACTTACTAGCTG
rs10857811	chr1:110329730	ACACATGTTTCTTGAGCCTGAATCCACCACTGAACCTATGGTTTTCTGCTCATTCTCTCTG	ACACATGTTTCTTGAGCCTGAATCCACCACGGAACCTATGGTTTTCTGCTCATTCTCTCTG
rs1466788	chr1:110330772	AGAAGGAAGAGAGTTTGGGTTGGGGTGGGAAAAGAGAGACAAAGTCCACAGGAATCTAGAG	AGAAGGAAGAGAGTTTGGGTTGGGGTGGGAGAAGAGAGACAAAGTCCACAGGAATCTAGAG
rs437512	chr2:219751673	CACCGACAGGCAGGCTGTGGGATGTGCACCAGGTTGATACAGAACCCAGCTCCACCAAGCT	CACCGACAGGCAGGCTGTGGGATGTGCACCGGGTTGATACAGAACCCAGCTCCACCAAGCT
rs7592246	chr2:219751726	TGTCGGTGTCAAACTGGGGATGGGGAGTCTAGCCTTTTGAAGAGTCAAATAGGGGGTTTTA	TGTCGGTGTCAAACTGGGGATGGGGAGTCTGGCCTTTTGAAGAGTCAAATAGGGGGTTTTA
rs1961560	chr2:219753431	CCAACGAGGTGGCTCTGCTGCAGAGGCACACCTGATGGCAAGCTATGGGAGTACTTATAGC	CCAACGAGGTGGCTCTGCTGCAGAGGCACAACTGATGGCAAGCTATGGGAGTACTTATAGC
rs726358	chr2:219753489	ACTGTTCCTAAATTAGCCTGGCAGAGGAGGGTCTGGTCTTGGTGAAGCCCAGTCTCAACCA	ACTGTTCCTAAATTAGCCTGGCAGAGGAGGATCTGGTCTTGGTGAAGCCCAGTCTCAACCA
rs17655003	chr2:219755986	GGTACTTCAGAGAGAGTCAGGCATTAAAGACCTTGCTTTGATGACTTTGAAAAGCTAGGAA	GGTACTTCAGAGAGAGTCAGGCATTAAAGATCTTGCTTTGATGACTTTGAAAAGCTAGGAA
rs1052483	chr2:219759853	TTCTCTACCTGCTTCAGTTCCATTTGATGACCGCCATCATCTTTGAGATTCCCATCCAGAA	TTCTCTACCTGCTTCAGTTCCATTTGATGAACGCCATCATCTTTGAGATTCCCATCCAGAA
rs585916	chr17:44918872	CCCCTTGCGGATGTTCTCAGGTGTCTCATCTAAATCCCTTCCCTGGCCACTCCCCTCTCCT	CCCCTTGCGGATGTTCTCAGGTGTCTCATCCAAATCCCTTCCCTGGCCACTCCCCTCTCCT
rs1035050	chr17:44919011	CAATCTCCCCATCTTTGTATTGATGTAAGCTTCACCTCTCTGCCCACTGGCATCCGAACTC	CAATCTCCCCATCTTTGTATTGATGTAAGCCTCACCTCTCTGCCCACTGGCATCCGAACTC
rs2671687	chr17:44919837	CCAGCCCAGCCCAGCCTACAGGGTGCCCAGAAGAGGGGAGAGAGGCAGGGTGGGGGCACCT	CCAGCCCAGCCCAGCCTACAGGGTGCCCAGGAGAGGGGAGAGAGGCAGGGTGGGGGCACCT
rs603769	chr17:44925084	AATGAATGCAAGGGAAGTGAGTTCCTCCTTATGATGAACACCACGTTACTTCATTTGATCC	AATGAATGCAAGGGAAGTGAGTTCCTCCTTGTGATGAACACCACGTTACTTCATTTGATCC
rs11466117	chr17:44925962	AGACTGCTAGCGTGCTCTCTTCATGAGCACTGTTTTTTGTTTGTTTGTTTGTTTGTTTTTT	AGACTGCTAGCGTGCTCTCTTCATGAGCACCGTTTTTTGTTTGTTTGTTTGTTTGTTTTTT
rs13152482	chr4:71236078	TAGAGAAAACAAAACTTCTTTCATTGAAATGTGACCTGAACAATAAGCACTATTCTTAGGT	TAGAGAAAACAAAACTTCTTTCATTGAAATATGACCTGAACAATAAGCACTATTCTTAGGT
rs926003	chr4:71236771	GTACTAAAACCGTAATTTATCTGGTGGGGTGGGGGGTGTAAATATTTAGAGATATGTGAAT	GTACTAAAACCGTAATTTATCTGGTGGGGTAGGGGGTGTAAATATTTAGAGATATGTGAAT
rs17652999	chr4:71241791	TTTGAAGTTTTGCTTTTCAGACCTATGATTCCTAACAATTCTGTATTTCGCCCTTGAAGTA	TTTGAAGTTTTGCTTTTCAGACCTATGATTTCTAACAATTCTGTATTTCGCCCTTGAAGTA
rs3756131	chr4:71243102	AAAAGAAGGGATTGTTGAAGGTTTAACACAGTGGGACTAGTAGTGCCATAAAATCACTTAC	AAAAGAAGGGATTGTTGAAGGTTTAACACAATGGGACTAGTAGTGCCATAAAATCACTTAC
rs17704351	chr4:71243186	TTTTTACTTTTAGCTTATCCCACAGCGTCTCATGTCTGCCAGCAATAGCAATGAGGTTAGT	TTTTTACTTTTAGCTTATCCCACAGCGTCTTATGTCTGCCAGCAATAGCAATGAGGTTAGT
rs1514393	chr4:71244119	AACAGCAGGTTGGCAGGTTTAGGGTTAAGGTAGGGGAAAATACAGACGGTTTAAAACCAGT	AACAGCAGGTTGGCAGGTTTAGGGTTAAGGCAGGGGAAAATACAGACGGTTTAAAACCAGT
rs1514394	chr4:71244134	GGTTTAGGGTTAAGGTAGGGGAAAATACAGACGGTTTAAAACCAGTGTGGCATATGCAGAT	GGTTTAGGGTTAAGGTAGGGGAAAATACAGGCGGTTTAAAACCAGTGTGGCATATGCAGAT
rs7801794	chr7:37983077	CACCAAAATGCAATCAAATACCTCAAAGAAGGAGAGAACAGGATGGAAATGACCAAATTTA	CACCAAAATGCAATCAAATACCTCAAAGAAAGAGAGAACAGGATGGAAATGACCAAATTTA
rs3760490	chr17:4748705	CCTGAATACATGAAAGGGGATGCTAAGGTCGGGATCCAGGGTCACACAAGTAGATTGGCAA	CCTGAATACATGAAAGGGGATGCTAAGGTCAGGATCCAGGGTCACACAAGTAGATTGGCAA
rs2661697	chr17:4748774	GAGACTTATCAATCAACTCTATTGATCTCGTACACCTGTGTTTATTTTACCCTTCACAAAA	GAGACTTATCAATCAACTCTATTGATCTCGCACACCTGTGTTTATTTTACCCTTCACAAAA
rs398926	chr2:219689094	TCTGCTCTCTAGGAAAAAATGCTTGGGAACCGAGCCGAGGACCTGGCTTCTGGAGTTGGTG	TCTGCTCTCTAGGAAAAAATGCTTGGGAACTGAGCCGAGGACCTGGCTTCTGGAGTTGGTG
rs371825	chr2:219689161	CTGGCGCCATTTGGGGATTTTGGTCAGTCAATCCCCTCTTAAGGCCTCTGTTTTTTACCTA	CTGGCGCCATTTGGGGATTTTGGTCAGTCAGTCCCCTCTTAAGGCCTCTGTTTTTTACCTA
rs422433	chr2:219689907	AGATAACAAGAGATGTACGCTGAGAGAGATTGGGGATGTGGATTCATGGGGCTAGGGCTCA	AGATAACAAGAGATGTACGCTGAGAGAGATGGGGGATGTGGATTCATGGGGCTAGGGCTCA
rs13222970	chr7:6350816	TGTGACTGCTACCAATTTGCTGTGTGGCTTCAGGCCAGCCTCTTAACCTCTCCGAGCCTCA	TGTGACTGCTACCAATTTGCTGTGTGGCTTTAGGCCAGCCTCTTAACCTCTCCGAGCCTCA
rs13225983	chr7:6351821	GAAAGGAAAGAAAGGAAATCAAAGGGCCAAGAGCACACATGGTTTGTAGGGTGGAGGTCGA	GAAAGGAAAGAAAGGAAATCAAAGGGCCAAAAGCACACATGGTTTGTAGGGTGGAGGTCGA
rs6950897	chr7:6356438	TTTCCTGGCCACCCTGTCAAAGTGGGTTGCGTCACTCTCACCTCACCCTATTTATGCCTCC	TTTCCTGGCCACCCTGTCAAAGTGGGTTGCATCACTCTCACCTCACCCTATTTATGCCTCC
rs4720679	chr7:6359609	GTTCCTCCTTGCCAGAAAACACACTGCAGCTGGCCTGGGCAGCCTGTCGGATTCTACCCTC	GTTCCTCCTTGCCAGAAAACACACTGCAGCCGGCCTGGGCAGCCTGTCGGATTCTACCCTC
rs11079738	chr17:42259048	ATAACACTTGTCTCAAAAAGACAATTGCCTATTCAGCAGAGTGATAGCTGCTGTGTTTGAA	ATAACACTTGTCTCAAAAAGACAATTGCCTGTTCAGCAGAGTGATAGCTGCTGTGTTTGAA
rs3756339	chr5:140160721	TAAATATGTAAACGTATCTTCTTTTCCTTGTATGTCGTTTGAACTTTCCCAAAATTTCTAG	TAAATATGTAAACGTATCTTCTTTTCCTTGCATGTCGTTTGAACTTTCCCAAAATTTCTAG
rs3756338	chr5:140160745	TCATGTGGCTAAACGTGTAAGTATTAAATATGTAAACGTATCTTCTTTTCCTTGTATGTC	TCATGTGGCTAAACGTGTAAGTATTAAATACGTAAACGTATCTTCTTTTCCTTGTATGTC
rs3806845	chr5:140160921	AATATTAGATTGCCTTTACATTGATCCAAAGTTTAAAAATAATTCGAGTTCCTTATCTTC	AATATTAGATTGCCTTTACATTGATCCAAAATTTAAAAATAATTCGAGTTCCTTATCTTC
rs3733708	chr5:140161918	GATTTCCTTTATCCGTGGCTTCTACCTGGATTTCATATGACTTACTTTCCTCGAAATCTAT	GATTTCCTTTATCCGTGGCTTCTACCTGGACTTCATATGACTTACTTTCCTCGAAATCTAT
rs3733707	chr5:140162076	TCCTGAGTCGCGGTCGGACACGCTGATCAGAGCGATGACTGTGCTAAGTGGAGAGTCTTCT	TCCTGAGTCGCGGTCGGACACGCTGATCAGGGCGATGACTGTGCTAAGTGGAGAGTCTTCT
rs2240694	chr5:140163242	AGGTCGGTCTTGGGCAACCCCTCTCCAGAGCACACCCTCTGCTGCCTCTGCTGCGAGTATG	AGGTCGGTCTTGGGCAACCCCTCTCCAGAGTACACCCTCTGCTGCCTCTGCTGCGAGTATG
rs2240693	chr5:140163509	TTGGTTCAAAAATTAGCAACAAAAATCTTACCGTTTTAACCACAAAACCACAAAACTGGAA	TTGGTTCAAAAATTAGCAACAAAAATCTTAGCGTTTTAACCACAAAACCACAAAACTGGAA
rs2240692	chr5:140163769	AGGTGAACTCATAAAATGAGCAAGTAACATTTGTACTAACAGGTAGTAGGAAGTCCAAATG	AGGTGAACTCATAAAATGAGCAAGTAACATCTGTACTAACAGGTAGTAGGAAGTCCAAATG
rs6579987	chr5:140163843	CCCTATTGATTATGCTTTTCCACCTTCAGTTTCAAAAATTAGATCATTACACCTGTTGTCT	CCCTATTGATTATGCTTTTCCACCTTCAGTCTCAAAAATTAGATCATTACACCTGTTGTCT
rs1030163	chr5:140165316	TTAGACAAACAGGATGAAAATAACTTTATGGATATAGGAGGCAAGGAAAGTTTTTAAATGG	TTAGACAAACAGGATGAAAATAACTTTATGAATATAGGAGGCAAGGAAAGTTTTTAAATGG
rs1030164	chr5:140165456	CCCATTAATACCCAGGATGATTCAAAGATCATGATTACCAAGAATTAGAATAAAAATTAAG	CCCATTAATACCCAGGATGATTCAAAGATCGTGATTACCAAGAATTAGAATAAAAATTAAG
rs1030165	chr5:140165632	CAACTAGATATGCGATCACCTTAAATTAATGCATTTTATTAGGCAATGGAAGGAAGCAAAC	CAACTAGATATGCGATCACCTTAAATTAATACATTTTATTAGGCAATGGAAGGAAGCAAAC
rs1030166	chr5:140165657	TTAATGCATTTTATTAGGCAATGGAAGGAAGCAAACATTTTCTGCAGGGTAAATATTTAGG	TTAATGCATTTTATTAGGCAATGGAAGGAAACAAACATTTTCTGCAGGGTAAATATTTAGG
rs3756337	chr5:140166622	TTTTGTACTACTGTGGTACACATTGTACCACTGATTGATTGAGTGTGGTCCTTAGTTTCGC	TTTTGTACTACTGTGGTACACATTGTACCAGTGATTGATTGAGTGTGGTCCTTAGTTTCGC
rs4151680	chr5:140166841	TCCTTCTATTCTTACTGGAAGGAACCATATACACTCTTTGGAGTCTGAAATATGGAGGATG	TCCTTCTATTCTTACTGGAAGGAACCATATGCACTCTTTGGAGTCTGAAATATGGAGGATG
rs1867299	chr12:52616242	TGGGGAACCAAGCAAAAGAAGAGGGAATTGTTCAGAGCAAGCGGACTTCCCCAGCCGCCTT	TGGGGAACCAAGCAAAAGAAGAGGGAATTGCTCAGAGCAAGCGGACTTCCCCAGCCGCCTT
rs635563	chr1:224443569	CGAGCCTGCCCAGCCACGTGCTGCAGGGGCCTCAGAGACCTGGGCTGCGGTGCCAGGTCTC	CGAGCCTGCCCAGCCACGTGCTGCAGGGGCTTCAGAGACCTGGGCTGCGGTGCCAGGTCTC
rs849904	chr1:224443880	TGAAGCTCACCTGGCAAACTGGCCATCAGACACTCAGAAAGGGTATGCTCACAGGGGTGAC	TGAAGCTCACCTGGCAAACTGGCCATCAGAGACTCAGAAAGGGTATGCTCACAGGGGTGAC
rs6665129	chr1:224447195	GTGCCCCCACCAAACAGAAGCAGCTCTAACATCCTTCGATCCACTCAAGTCACCATGTGGC	GTGCCCCCACCAAACAGAAGCAGCTCTAACGTCCTTCGATCCACTCAAGTCACCATGTGGC
rs2004997	chr5:172336134	CTGCTGTGACCAATCCCATGTACTCAGAACATTACCCATCTAAAGCATTTTTCATATCTCA	CTGCTGTGACCAATCCCATGTACTCAGAACGTTACCCATCTAAAGCATTTTTCATATCTCA
rs2004998	chr5:172336338	AGAAATAGGAGAGGCAACATGGCTTAGTGGGAAGAACAGGAGCTACAAAGAGCCGTGTTCA	AGAAATAGGAGAGGCAACATGGCTTAGTGGAAAGAACAGGAGCTACAAAGAGCCGTGTTCA
rs539321	chr5:172337763	ATTTGTCTTCTATTAAACCAGAGGTCAAGGCGTTCTCCCAAAATGTAACACAATGTTACTC	ATTTGTCTTCTATTAAACCAGAGGTCAAGGAGTTCTCCCAAAATGTAACACAATGTTACTC
rs572124	chr5:172338658	GGATTACAGGCGTGAGCCACCGCGCCCGGCTGGATGTAACTCTTTAGACACCAATTCTGTC	GGATTACAGGCGTGAGCCACCGCGCCCGGCCGGATGTAACTCTTTAGACACCAATTCTGTC
rs17145813	chr7:72491409	TATGTTAGACTTAGTGGTTTTATTTGAAAACGAAACCGACTTTGCACCCATATACATATAT	TATGTTAGACTTAGTGGTTTTATTTGAAAAAGAAACCGACTTTGCACCCATATACATATAT
rs17145817	chr7:72491430	ATTTGAAAACGAAACCGACTTTGCACCCATATACATATATGAAATCAGCCATTCTACATCC	ATTTGAAAACGAAACCGACTTTGCACCCATGTACATATATGAAATCAGCCATTCTACATCC
rs2453280	chr15:56155671	TTTGCACTGTTTTCCCTTGTTGACTGTCCTATAATAACCTTCCTGCATACAGTTGTCCCTA	TTTGCACTGTTTTCCCTTGTTGACTGTCCTGTAATAACCTTCCTGCATACAGTTGTCCCTA
rs987917	chr12:8993842	CTCCCGGGTAGGGTTCGAGTGAAGAGGGTGAGAGGGGCAGGTGGCGGAAGCGGAAGTTACG	CTCCCGGGTAGGGTTCGAGTGAAGAGGGTGCGAGGGGCAGGTGGCGGAAGCGGAAGTTACG
rs10842598	chr12:8994192	TGGTATTTTGCTTGATAAGCATGCTCTGCAACCACCTCTGTTCGCCAGAGGTTACTTCTGC	TGGTATTTTGCTTGATAAGCATGCTCTGCACCCACCTCTGTTCGCCAGAGGTTACTTCTGC
rs1805754	chr12:8994515	TGTAGTAGTTCTAATGAGAGGGGTAAGAATCAAAAATCCAGGCACCTGCATAGAGCCAGAG	TGTAGTAGTTCTAATGAGAGGGGTAAGAATAAAAAATCCAGGCACCTGCATAGAGCCAGAG
rs4639983	chr12:8995474	TTGAGCATTTAAGTTATTTCTACTGACTTATTTTTTATCAAGTAACTCAACACAGCTTTAC	TTGAGCATTTAAGTTATTTCTACTGACTTACTTTTTATCAAGTAACTCAACACAGCTTTAC
rs1805724	chr12:8995876	GAACCTTGAGCTCAGTTCTCAGAGGTGAGAATTCTAACACAGAAAGCACCCAGAAAGGGCA	GAACCTTGAGCTCAGTTCTCAGAGGTGAGAGTTCTAACACAGAAAGCACCCAGAAAGGGCA
rs4883203	chr12:9003064	ATAGACATAGTTGAACAATGACCCGCCATTACTTAGCTTGTTTTTGTTATATAAGTTGCTT	ATAGACATAGTTGAACAATGACCCGCCATTGCTTAGCTTGTTTTTGTTATATAAGTTGCTT
rs3095870	chr5:172596060	AAAACTCCTCTCTGCAGTGTTCTGGGGAATGGAGAAGACCCCAAGCTTTCATCAGACCTCC	AAAACTCCTCTCTGCAGTGTTCTGGGGAATAGAGAAGACCCCAAGCTTTCATCAGACCTCC
rs6882776	chr5:172596769	GTGGAGGATGCCTTTTCTTAAATGTGGGGCGTTCAAGGCCCAGGAAACCTCGTCCCCCCAC	GTGGAGGATGCCTTTTCTTAAATGTGGGGCATTCAAGGCCCAGGAAACCTCGTCCCCCCAC
rs6891790	chr5:172603351	GTTTTGTTTTGTTGTAAGTCAGTTTTCTTAGGCTCTGGGGAGTATGTTTCCCAACCCGAAT	GTTTTGTTTTGTTGTAAGTCAGTTTTCTTATGCTCTGGGGAGTATGTTTCCCAACCCGAAT
rs17720428	chr12:52643465	CTGTTTGGGCCTCCTAAAATTGGTCCCATTTGGATCTTTCCTTAGCAACTAAAAATCCAGA	CTGTTTGGGCCTCCTAAAATTGGTCCCATTGGGATCTTTCCTTAGCAACTAAAAATCCAGA
rs17840857	chr12:52644024	TGAGTGCCCGTCTTGCCCTCTGCCACGTTTGTTCCGGGAACTGCCGCCTTGCTCCCTTGCC	TGAGTGCCCGTCTTGCCCTCTGCCACGTTTTTTCCGGGAACTGCCGCCTTGCTCCCTTGCC
rs10783616	chr12:52645487	CCCCAAGTGGGCACTGGTCCCAAAGTGAAGCCTCTTTTGATCCTAAATTGGCCTTCCCCCT	CCCCAAGTGGGCACTGGTCCCAAAGTGAAGGCTCTTTTGATCCTAAATTGGCCTTCCCCCT
rs920778	chr12:52646499	GAGTGTACCGCCTTGTTTTCTGAAGGAAACCGTAACATTCAGACATTTAAGCTGTAAATGA	GAGTGTACCGCCTTGTTTTCTGAAGGAAACTGTAACATTCAGACATTTAAGCTGTAAATGA
rs17105613	chr12:52648461	ATACCCGGAGATAAAAGTCTAGACAATAGATGGCTGTTTATGACAACGAGGCTCTCCAAGT	ATACCCGGAGATAAAAGTCTAGACAATAGACGGCTGTTTATGACAACGAGGCTCTCCAAGT
rs6087704	chr20:33464472	TTACATCCCAAGAGAAGAGAAGACAAAGTACTGGTGCTTTGGGGGTTGAGGGAGCAGAGGG	TTACATCCCAAGAGAAGAGAAGACAAAGTATTGGTGCTTTGGGGGTTGAGGGAGCAGAGGG
rs6087705	chr20:33464664	TGAAAAAAATTAAAACTGGGGAGCTACTTTGGTTAGGTTGGTAAGGCCTCTCCAAGAAAGT	TGAAAAAAATTAAAACTGGGGAGCTACTTTAGTTAGGTTGGTAAGGCCTCTCCAAGAAAGT
rs7870728	chr9:23819728	GGGGAAAAGTTGTGAAAATTGACACCAGTGTGAATTTATACCGTGGCAACCACGCAAGAGA	GGGGAAAAGTTGTGAAAATTGACACCAGTGGGAATTTATACCGTGGCAACCACGCAAGAGA
rs12341793	chr9:23819824	CAGCCCTCAAATTAAGATTTGCAAAGCTTGAGACGGTGTTTTCTGTCCCTTTCTGTGAGAC	CAGCCCTCAAATTAAGATTTGCAAAGCTTGGGACGGTGTTTTCTGTCCCTTTCTGTGAGAC
rs17557796	chr9:23820403	CCTTTACTTTCTCTTTACATTGTGTCTGTAAACTCCTGTTCAAGGGGGAAAGACTGTAAAG	CCTTTACTTTCTCTTTACATTGTGTCTGTAGACTCCTGTTCAAGGGGGAAAGACTGTAAAG
rs4142149	chr9:23821141	TTTACCGGGACCTGGGAAGAAACGGTTTTTATGCTTCCGATGCTCGGAGGCTCTTTCTTAT	TTTACCGGGACCTGGGAAGAAACGGTTTTTCTGCTTCCGATGCTCGGAGGCTCTTTCTTAT
rs894738	chr12:52703792	AAAGGTACACTCCTCCTTTCAAAGTTTAGGCATGGAGAGAAGTGAAATTTGACACACCTAA	AAAGGTACACTCCTCCTTTCAAAGTTTAGGTATGGAGAGAAGTGAAATTTGACACACCTAA
rs736825	chr12:52703843	GGGAAGCTGTCTGAGCACATACCTGCCCCCGCTACACACACCGCATTCCAAAAAGGTACAC	GGGAAGCTGTCTGAGCACATACCTGCCCCCCCTACACACACCGCATTCCAAAAAGGTACAC
rs894737	chr12:52704410	GCCGCGCTGCAACTACAGCTCGGTGCCTCCTGAGGCTGCTCGGGGACCCAAGCACTGGAGC	GCCGCGCTGCAACTACAGCTCGGTGCCTCCGGAGGCTGCTCGGGGACCCAAGCACTGGAGC
rs2077177	chr12:52705124	AACCCCATCAGGCTTGCAGGTCTCCTTGCTACTGCTCTGGCCCCTTAGCCTCCCAAATCAG	AACCCCATCAGGCTTGCAGGTCTCCTTGCTGCTGCTCTGGCCCCTTAGCCTCCCAAATCAG
rs754133	chr12:52705187	GGAGAGAACTTGTTCTTTGTTTCTATAAAACGAGCCTAAAGAAATCAGAGAACACTACCCC	GGAGAGAACTTGTTCTTTGTTTCTATAAAATGAGCCTAAAGAAATCAGAGAACACTACCCC
rs10876528	chr12:52707743	TAGGCAAAAATGCTGGAAGAGTTTTCCCAACAGAGGGGTCCTGAGAAGGAGGCAGAAGGGA	TAGGCAAAAATGCTGGAAGAGTTTTCCCAAAAGAGGGGTCCTGAGAAGGAGGCAGAAGGGA
rs9916116	chr17:39701505	TGCAGTTTTCTCCACAGGGAACTGCTCAGCACTCACGGGGCACGGACAGCCCCCTCCCCTC	TGCAGTTTTCTCCACAGGGAACTGCTCAGCGCTCACGGGGCACGGACAGCCCCCTCCCCTC
rs7222501	chr17:39710183	CTCTACATTTTTACTGAATGAATGATTGAACGACTCCCCACAATAATGATTTGAGAATGCA	CTCTACATTTTTACTGAATGAATGATTGAATGACTCCCCACAATAATGATTTGAGAATGCA
rs1725074	chr7:26918161	CCCTGGGGGAAGGAGGAAGCCTCCAAACCACCCCTCCCTCAGCTAAAGAGTAGATTTCAGA	CCCTGGGGGAAGGAGGAAGCCTCCAAACCATCCCTCCCTCAGCTAAAGAGTAGATTTCAGA
rs2465275	chr7:26918340	AAGACTCCTGTATCTGCTTAGCGTGACGAAGAGGTGGAAGCTCTAGTCTTCACAAAGCCTG	AAGACTCCTGTATCTGCTTAGCGTGACGAAAAGGTGGAAGCTCTAGTCTTCACAAAGCCTG
rs11564055	chr7:26918590	TTGGCATCCTCCGAGCCTTTTCCTTAAACCATGAGGAGTTTCTCTAAAAGCAGCTCGTTGG	TTGGCATCCTCCGAGCCTTTTCCTTAAACCGTGAGGAGTTTCTCTAAAAGCAGCTCGTTGG
rs2428433	chr7:26918757	CAAACAAAATGGCGACATTTTCCACTTCTGTCTCTGAAAGATACAATCCAGGGAGAATAGG	CAAACAAAATGGCGACATTTTCCACTTCTGCCTCTGAAAGATACAATCCAGGGAGAATAGG
rs2465276	chr7:26918957	AATCTGAAGATGAAAATATTTCCCTTTACTGTGCCTTCTTTTGCCTCTTCTAGCCAGTCAG	AATCTGAAGATGAAAATATTTCCCTTTACTATGCCTTCTTTTGCCTCTTCTAGCCAGTCAG
rs2428434	chr7:26918975	TTTCCCTTTACTGTGCCTTCTTTTGCCTCTTCTAGCCAGTCAGTAAGCAGCCCTATCTTAA	TTTCCCTTTACTGTGCCTTCTTTTGCCTCTACTAGCCAGTCAGTAAGCAGCCCTATCTTAA
rs4561561	chr18:17548490	CTTCTCCAGGAGTCTCCTTCTCCAGGGTCCTTGGGAGTTAGTCTCAATGTTGGCCTTTCGG	CTTCTCCAGGAGTCTCCTTCTCCAGGGTCCATGGGAGTTAGTCTCAATGTTGGCCTTTCGG
rs11873192	chr18:17548672	TCCAAATTGGCCTTCCACAACATGCACTCTAGGGAAACCAACTGCCATGTAAGAAGTCCTA	TCCAAATTGGCCTTCCACAACATGCACTCTGGGGAAACCAACTGCCATGTAAGAAGTCCTA
rs897122	chr2:70051922	TTGTGACTCAGTCTGGAAATCTGTTTAAACCACCTTGTCTTTATACAACTACCAACAGGAG	TTGTGACTCAGTCTGGAAATCTGTTTAAACTACCTTGTCTTTATACAACTACCAACAGGAG
rs3755391	chr2:70053170	GGGCCCTCGCCAGCCCGAGTTCCGCGAAGCCCAGAACCTCCAGGGCCGCGGCCACCAGACC	GGGCCCTCGCCAGCCCGAGTTCCGCGAAGCTCAGAACCTCCAGGGCCGCGGCCACCAGACC
rs1293454	chr18:13809037	TCCAGAAGCACATAGCTCCTGATAAGCAACGGAACTCACTGTGCTCCTGCTGAAGGGTGTG	TCCAGAAGCACATAGCTCCTGATAAGCAACTGAACTCACTGTGCTCCTGCTGAAGGGTGTG
rs1284085	chr18:13809504	AGATTCTGAAAGTCCCTGGGGAAGGTTATGTTTGAAACTGTACACACCTCTCATCTTTGAA	AGATTCTGAAAGTCCCTGGGGAAGGTTATGCTTGAAACTGTACACACCTCTCATCTTTGAA
rs1293455	chr18:13809673	TCCACACCAACCCTCAATATTCCCTCTCAAGCCAGAAAACGAGGACTTGGGGTTTGGTGTG	TCCACACCAACCCTCAATATTCCCTCTCAAACCAGAAAACGAGGACTTGGGGTTTGGTGTG
rs1284082	chr18:13810244	GACATGCAGAGAGGCCCGTGATGGGTACAGAATGGGCCAAAGCAGGAGATGGAAGCTGAGG	GACATGCAGAGAGGCCCGTGATGGGTACAGGATGGGCCAAAGCAGGAGATGGAAGCTGAGG
rs1299348	chr18:13812256	GGGAACCCATTTCCGTGTGTTGAAAACATCAGCAGGGTCAAGCACTCCCACATATAGTCCT	GGGAACCCATTTCCGTGTGTTGAAAACATCGGCAGGGTCAAGCACTCCCACATATAGTCCT
rs1293453	chr18:13814942	CTTAAGTTTGTAAGTGTAGGCTGCACATACGTGTTAAAATTGAGGAAAACAGTGCTGCTTT	CTTAAGTTTGTAAGTGTAGGCTGCACATACATGTTAAAATTGAGGAAAACAGTGCTGCTTT
rs3016890	chr8:101735963	TTCCCAGCAGTTTCATTTCCATAGAGTGGTGTTTTCCTGATGTCATCCCTCAAATCTGGGG	TTCCCAGCAGTTTCATTTCCATAGAGTGGTATTTTCCTGATGTCATCCCTCAAATCTGGGG
rs3016889	chr8:101738449	TTTACTGTAAGGTACAATATCCAATGGCACGCCATCTTTCTGTGTAAGCTTCATTAGCATG	TTTACTGTAAGGTACAATATCCAATGGCACACCATCTTTCTGTGTAAGCTTCATTAGCATG
rs1786349	chr8:101739829	AGCATTTGAGCATCCACTCACTGTCGCTCAGTAGGTTTCTAGCAGCACAAGAAATGAACTT	AGCATTTGAGCATCCACTCACTGTCGCTCAATAGGTTTCTAGCAGCACAAGAAATGAACTT
rs7002825	chr8:101740397	ATATGTTGATTTAAGAAGAACTTAGATTCATGTGGGATTCACACATGGATTACAAAGCAGG	ATATGTTGATTTAAGAAGAACTTAGATTCACGTGGGATTCACACATGGATTACAAAGCAGG
rs1490956	chr17:24364732	CCTCATCCTGCACTTACAGTGCACTTACAATTGCAAGCATTAATAAGGCACATATAATATG	CCTCATCCTGCACTTACAGTGCACTTACAACTGCAAGCATTAATAAGGCACATATAATATG
rs7220474	chr17:24365560	GGCTCTAGAACCTATGTTCTTAACTACCACATTACCCGCAGCCCCATGGGCTGGGTCCATC	GGCTCTAGAACCTATGTTCTTAACTACCACGTTACCCGCAGCCCCATGGGCTGGGTCCATC
rs1844754	chr17:24365902	TTCCTATTGGTTCCCTAATATAGGCAACACCGTTCCTGCCGCTTTTCTGGGCTGGAGATTA	TTCCTATTGGTTCCCTAATATAGGCAACACTGTTCCTGCCGCTTTTCTGGGCTGGAGATTA
rs1563672	chr16:87394458	CGCTGCTCCCTTGGCCAGGAACCCTTGTGCAGGCCTTAGCTGGCACAGCTCTGCGTGGCGA	CGCTGCTCCCTTGGCCAGGAACCCTTGTGCGGGCCTTAGCTGGCACAGCTCTGCGTGGCGA
rs565211	chr16:87395753	TTGCAAAACACAGGTCTAGGTGCTGATCCCTTATATACAGATGGAAAACAAATGCCTCACC	TTGCAAAACACAGGTCTAGGTGCTGATCCCCTATATACAGATGGAAAACAAATGCCTCACC
rs477956	chr1:178174837	CAAACAAATAAAGAATAATTACAAAGAAAAGTATAGGTGATGCTGTTTATAATATTATTTG	CAAACAAATAAAGAATAATTACAAAGAAAAATATAGGTGATGCTGTTTATAATATTATTTG
rs636145	chr1:178180494	AAATTGTTTATCAAGAGAAGAAACTATACAATGACACTAAGCCTATGGAAATGCTATGCTT	AAATTGTTTATCAAGAGAAGAAACTATACAGTGACACTAAGCCTATGGAAATGCTATGCTT
rs633143	chr1:178181142	TATGTGAGTTAAAAGGGATAATTCTTGGAGGGTGCAGCCAAAAAGGAAAGGGGCAAACATA	TATGTGAGTTAAAAGGGATAATTCTTGGAGAGTGCAGCCAAAAAGGAAAGGGGCAAACATA
rs541886	chr1:178183046	GCGGTGCCACGGGCCCGCCGCCGCCCTAGTAAGGTGTCGGGGCCTTTGCGCGCCTAGCGCC	GCGGTGCCACGGGCCCGCCGCCGCCCTAGTGAGGTGTCGGGGCCTTTGCGCGCCTAGCGCC
rs17047438	chr2:118285636	AACTGAAAAACAAAACAGCATGAATAAGACCTGTTCTATGTTAAACTTAATTATTTTTAGT	AACTGAAAAACAAAACAGCATGAATAAGACTTGTTCTATGTTAAACTTAATTATTTTTAGT
rs11694410	chr2:118287463	GGCCAATTTTTAAAGACAAATATGAATTTTTATGGAAATCTCCAAGTATTTTAATGTTGAT	GGCCAATTTTTAAAGACAAATATGAATTTTCATGGAAATCTCCAAGTATTTTAATGTTGAT
rs2071528	chr1:232554722	ACCACGGTGCGGGTCCCGCGCTCTGCTCCCCCTCCCGGAGGCGCCGTTCGCTGGGAGTCGG	ACCACGGTGCGGGTCCCGCGCTCTGCTCCCTCTCCCGGAGGCGCCGTTCGCTGGGAGTCGG
rs2071527	chr1:232554827	GAATTGGACCCCGGACGCGGCCGAGCGGCAATGGGGTGGGCGCCGTTCCTGAATCCGGAGC	GAATTGGACCCCGGACGCGGCCGAGCGGCAGTGGGGTGGGCGCCGTTCCTGAATCCGGAGC
rs964114	chr1:232556941	AATTCAAAATGCCAAGACCGTTAAGGCACAGTCCTTTCTTTGAGAAGCTCACAATCTATCA	AATTCAAAATGCCAAGACCGTTAAGGCACAATCCTTTCTTTGAGAAGCTCACAATCTATCA
rs12044331	chr1:232561837	ATCAGGTTGTTTGGTGTTTTTGGCAGTGGTGGTCATTTTTAAAGTTTTCAATTTGAAAAAT	ATCAGGTTGTTTGGTGTTTTTGGCAGTGGTAGTCATTTTTAAAGTTTTCAATTTGAAAAAT
rs2064919	chr1:232564359	AGCCTCCCAAATAGCGGGGATTACAGACATGCGCCACCACCCTCAGCTAATTTTGTATTTT	AGCCTCCCAAATAGCGGGGATTACAGACATACGCCACCACCCTCAGCTAATTTTGTATTTT
rs436760	chr8:24200543	TGACCTCCATTTTCACTGCTTCCTCACTGACCCATTGTTTTTTGGATGTGTTTCAGCAGCT	TGACCTCCATTTTCACTGCTTCCTCACTGATCCATTGTTTTTTGGATGTGTTTCAGCAGCT
rs7004152	chr8:24207250	ATATCATATCCGTAATGTAAATAAATGTCTAGCATGTTTTTCAAGACTCATTAATGCAGTT	ATATCATATCCGTAATGTAAATAAATGTCTGGCATGTTTTTCAAGACTCATTAATGCAGTT
rs1531025	chr2:69967156	TATACTGCCAATGGGAGTCTAAATTGGTACCTTGATGCAATCAACCCAGAGAGCAATTTGG	TATACTGCCAATGGGAGTCTAAATTGGTACATTGATGCAATCAACCCAGAGAGCAATTTGG
rs2278932	chr2:69967767	TCTATTTGAAATATTTTCATTATTTTACTTAAAAAGTAACAGAAGGGAGTCAGGGAATGAA	TCTATTTGAAATATTTTCATTATTTTACTTGAAAAGTAACAGAAGGGAGTCAGGGAATGAA
rs2278933	chr2:69968016	TCCATTCACGTCTACAGCAGGGGAGGGCTCATGTTAAGGAAGCCCAGGAATCCAGCATATC	TCCATTCACGTCTACAGCAGGGGAGGGCTCCTGTTAAGGAAGCCCAGGAATCCAGCATATC
rs17436084	chr2:42931578	GGACCGAGCCCCTGCCCCGCGGAGAAGCAGAGGGCGCGGGACGCCGTTCCCCAGCGCTGCC	GGACCGAGCCCCTGCCCCGCGGAGAAGCAGGGGGCGCGGGACGCCGTTCCCCAGCGCTGCC
rs17436079	chr2:42931887	CCGCCGTGCGGCTTCCCGCTGGGTGAGCGCCGCAGCCCTGAGTGGCGGGGCAGTCATTCCC	CCGCCGTGCGGCTTCCCGCTGGGTGAGCGCGGCAGCCCTGAGTGGCGGGGCAGTCATTCCC
rs2278581	chr2:42932565	CAGCATTCCAGACATAAAGACTCCTCTAGTACAACTCAAAATCAAAACCCAGACGACAGGA	CAGCATTCCAGACATAAAGACTCCTCTAGTGCAACTCAAAATCAAAACCCAGACGACAGGA
rs1065643	chr2:42932844	ATCCCTCCATTTAACTAACACTCAAAGCAAACTTAACACATCTCAGATCCTCAGTGCTTCA	ATCCCTCCATTTAACTAACACTCAAAGCAAGCTTAACACATCTCAGATCCTCAGTGCTTCA
rs3806583	chr2:42932987	CATTATTTGATCACATCAGTTAAAATACAGAGTACCTATCATTCTTTCCTTTGCACTATGG	CATTATTTGATCACATCAGTTAAAATACAGTGTACCTATCATTCTTTCCTTTGCACTATGG
rs1439644	chr2:42933400	TAAAGGATTAGAAGCAAATAGAATCTACCCCACGATCCAAGCTCAAAGGATCTGGCCTGCT	TAAAGGATTAGAAGCAAATAGAATCTACCCTACGATCCAAGCTCAAAGGATCTGGCCTGCT
rs920393	chr2:42934059	TCTTTATTTTTTAAAGTGCTTAATATTTTATTTTCCAAGAGAGATATGTTAAAATCTAACA	TCTTTATTTTTTAAAGTGCTTAATATTTTAGTTTCCAAGAGAGATATGTTAAAATCTAACA
rs2006695	chr2:42939248	AAAAAATTTAAAAATGAATCCAGTGTGGTGATGCGCACCTGTAGTCCCAGCTGCTTGGGAG	AAAAAATTTAAAAATGAATCCAGTGTGGTGGTGCGCACCTGTAGTCCCAGCTGCTTGGGAG
rs997703	chr19:57379500	CTGGCAACCATTGGCAGGAGGAGAACAGGGCTGGAGTCCCTTCAAAGTCCCAGTCCCAGGA	CTGGCAACCATTGGCAGGAGGAGAACAGGGTTGGAGTCCCTTCAAAGTCCCAGTCCCAGGA
rs1984750	chr19:57379575	CCCTATTTCATTGTCCCTCCACTGATCCACGGTAGACTTGAAAGCCAGCAGTCTCCGTCAG	CCCTATTTCATTGTCCCTCCACTGATCCACAGTAGACTTGAAAGCCAGCAGTCTCCGTCAG
rs17838831	chr3:150422559	ACACGTTCTCTGCCCTCCTGGAATTTACACAATGAATGGAAAAAGGCACAGAGTTATGCAC	ACACGTTCTCTGCCCTCCTGGAATTTACACGATGAATGGAAAAAGGCACAGAGTTATGCAC
rs696993	chr3:150424245	TTTCAGCCGTTTATCCTCCCCAGGGCATGGAGAAGGGGGACAGTTCTTTTTCTAATTGGCA	TTTCAGCCGTTTATCCTCCCCAGGGCATGGGGAAGGGGGACAGTTCTTTTTCTAATTGGCA
rs3755642	chr3:150424299	TGAAAAATGAAAAGCAAATGGCTGAGACAGTTGCTGGTTCACATCGTGGCTTCATGCCAAT	TGAAAAATGAAAAGCAAATGGCTGAGACAGCTGCTGGTTCACATCGTGGCTTCATGCCAAT
rs3755641	chr3:150424596	GAGTAACTACCACAAAACAGAACAGAAATACGGACTGCATGACCTTTTTTGCATTACACCA	GAGTAACTACCACAAAACAGAACAGAAATATGGACTGCATGACCTTTTTTGCATTACACCA
rs16861642	chr3:150425726	CCATGCCAACAGAATTATTAGGAAATCATCGAGAACTGTCCTTCACTTTGTGACAGCAGGA	CCATGCCAACAGAATTATTAGGAAATCATCAAGAACTGTCCTTCACTTTGTGACAGCAGGA
rs11708215	chr3:150425962	GATCCTATTCTCCCCTATCAGTCAGGTCATAACTGTTTAGGAAATGATCTCTCAGATAGTT	GATCCTATTCTCCCCTATCAGTCAGGTCATGACTGTTTAGGAAATGATCTCTCAGATAGTT
rs6546553	chr2:70023362	GCAGTCTCCTCAGCCTGGACAATCTCTTCCCCCTTTCCCCACCACAGATGTCACCCCATTT	GCAGTCTCCTCAGCCTGGACAATCTCTTCCACCTTTCCCCACCACAGATGTCACCCCATTT
rs10165883	chr2:70028666	GCTTCTTTGGGCCTTTTCTTGTCTGTTTAACCCCACATGGGGGCCATCCTTGGCTCATCTA	GCTTCTTTGGGCCTTTTCTTGTCTGTTTAATCCCACATGGGGGCCATCCTTGGCTCATCTA
rs2054046	chr2:70028725	TAGCACACTTTTCTCACTGGGACAATTTCATGGACTCCTGTAATGCATCACTCCCCCATCT	TAGCACACTTTTCTCACTGGGACAATTTCACGGACTCCTGTAATGCATCACTCCCCCATCT
rs13021969	chr2:70029253	ATCAAAAGCAAAAGTGTAACTAGGTCCTCATGCTGTGGAGCAAACGTGTACAAAAGGAATT	ATCAAAAGCAAAAGTGTAACTAGGTCCTCACGCTGTGGAGCAAACGTGTACAAAAGGAATT
rs13028508	chr2:70030078	AATGTATTCTTTTCAGTCTCACAGCTCAACTAATTGTGTGTGAATGTGTGTGTACATAAAC	AATGTATTCTTTTCAGTCTCACAGCTCAACAAATTGTGTGTGAATGTGTGTGTACATAAAC
rs6738783	chr2:70032259	TCTCCTAATTTTTGTAGTTTTGAACATTCTAAAGTTTTTGTTGTTGTTGTTGTTGTTTTCC	TCTCCTAATTTTTGTAGTTTTGAACATTCTGAAGTTTTTGTTGTTGTTGTTGTTGTTTTCC
rs7562668	chr2:71109278	CACAATCTTTCTTAATATGTTATTGGATATTATTTGCTAGTGTTTTATGGAGGATTTTTGC	CACAATCTTTCTTAATATGTTATTGGATATGATTTGCTAGTGTTTTATGGAGGATTTTTGC
rs17721027	chr2:71114163	ACCATCACCTTCCAAAGAAGAAATTGAACCCTTCTCTGGGCATTTTCTGCTGTCTGCCCTT	ACCATCACCTTCCAAAGAAGAAATTGAACCTTTCTCTGGGCATTTTCTGCTGTCTGCCCTT
rs17664519	chr2:71114204	ATTTTCTGCTGTCTGCCCTTCTCATGGTCCAGCTTCTGTTGTTCCACCAGGCGTTATCTGT	ATTTTCTGCTGTCTGCCCTTCTCATGGTCCGGCTTCTGTTGTTCCACCAGGCGTTATCTGT
rs2058552	chr2:71114732	AACTGTATCCCTGAAAAGCACTGTCACTTTATCTCAACTTGAAGCCAGTTGCTAAGGCCCT	AACTGTATCCCTGAAAAGCACTGTCACTTTGTCTCAACTTGAAGCCAGTTGCTAAGGCCCT
rs743811	chr22:34117528	TTGAATTTTACTAATAGGAGAATGGCTGAATAATTTTTTCCTATCAATTGTCGAACAAAGC	TTGAATTTTACTAATAGGAGAATGGCTGAACAATTTTTTCCTATCAATTGTCGAACAAAGC
rs12030741	chr1:245330674	CTTGTCACCTCTAGGTGTCGCTTGGTGAGGGGAGGGCCTAGGCCTAAGGGGAAGGGCTTCA	CTTGTCACCTCTAGGTGTCGCTTGGTGAGGCGAGGGCCTAGGCCTAAGGGGAAGGGCTTCA
rs9727917	chr1:245336724	TACTTCCCCGAGTTGCTCATCACATGTCATAATAAAAACAGCAAACACTTATGCAGTGTAT	TACTTCCCCGAGTTGCTCATCACATGTCATGATAAAAACAGCAAACACTTATGCAGTGTAT
rs10214770	chr6:35525769	AAACCTATGGATGGTATCTATGATGCTAATATGGTGCCTACTTAGATGTGGCACCTTTGTG	AAACCTATGGATGGTATCTATGATGCTAATGTGGTGCCTACTTAGATGTGGCACCTTTGTG
rs1269486	chr10:8136205	ATCGATGCGCTCTCCCAAACACCCTGCATTAGATCCTAATAATGATCCATGCGTGCCTATT	ATCGATGCGCTCTCCCAAACACCCTGCATTGGATCCTAATAATGATCCATGCGTGCCTATT
rs470898	chr11:116511624	CCCCCGGCAGCATGGACTCGTATGTACACCTGCCCGAGGCCTGAGCAACCTTTTCAGCAAG	CCCCCGGCAGCATGGACTCGTATGTACACCCGCCCGAGGCCTGAGCAACCTTTTCAGCAAG
rs2093169	chr6:26603078	AATTCTGGGCAGAACTCAAACAGTGGTCCACGCAACCTTGATCCCTTCCCTGAACTCTTTC	AATTCTGGGCAGAACTCAAACAGTGGTCCATGCAACCTTGATCCCTTCCCTGAACTCTTTC
rs2024970	chr6:26605499	TTCTTCTTCTTTCCCCCAGACCCTTTCTTTTCAGTATGGCTCCGTTAGTTGCAAGTAAAAG	TTCTTCTTCTTTCCCCCAGACCCTTTCTTTACAGTATGGCTCCGTTAGTTGCAAGTAAAAG
rs6926629	chr6:26607882	CCTCATGATGAGTTGCTTCAAAAGAAATAATTGTCAGGGAGGCAACTTTTGGGCCCTGTAA	CCTCATGATGAGTTGCTTCAAAAGAAATAACTGTCAGGGAGGCAACTTTTGGGCCCTGTAA
rs9393727	chr6:26607990	CCAACAGACACAGCACCTAAGGTGGACGGACGCTCCAATAACGAAGATGGCTATAGACAGA	CCAACAGACACAGCACCTAAGGTGGACGGAGGCTCCAATAACGAAGATGGCTATAGACAGA
rs3118108	chrX:128394002	AAATGCAGCTTCTGGGTCTGATGAGTGTTATGTTGGGAATTTTTAGAATTGTAATCATTTT	AAATGCAGCTTCTGGGTCTGATGAGTGTTAGGTTGGGAATTTTTAGAATTGTAATCATTTT
rs3131278	chrX:128394122	TTATGTATCATTTTTTATAAATTAACACTCCATAAAGGTCAAGACCAAGATGGCAAGCTAG	TTATGTATCATTTTTTATAAATTAACACTCTATAAAGGTCAAGACCAAGATGGCAAGCTAG
rs4649383	chr1:228957602	CCATTCAGACACCCTTGCTCTCACACCCATCTTGGGCACAGCTGGGGTACCATTAGCCGGA	CCATTCAGACACCCTTGCTCTCACACCCATTTTGGGCACAGCTGGGGTACCATTAGCCGGA
rs4394586	chr1:228958194	TATCTGTCTTTCCCCTCTGCTTCTGCCCACAAAGTTTCATGATCCACAGCACTGTTCGTAA	TATCTGTCTTTCCCCTCTGCTTCTGCCCACGAAGTTTCATGATCCACAGCACTGTTCGTAA
rs12084000	chr1:228958360	ACCCTAATTGCATCTAAGCAAAGAATGTTGTGATCCCACAGCACTCCATCTATATCCAACA	ACCCTAATTGCATCTAAGCAAAGAATGTTGCGATCCCACAGCACTCCATCTATATCCAACA
rs2182430	chr1:228959643	TTAAAGTGGTTCTTTGCATTTCGTGGATGCATTTGTTAATGTCATTTCTAGTTGGGGACTG	TTAAAGTGGTTCTTTGCATTTCGTGGATGCGTTTGTTAATGTCATTTCTAGTTGGGGACTG
rs2357070	chr1:228965098	GGGAAGACATAGACATGTCCTGGCATATGGACCCTCGGCAAATATCCAGCTCTACTATATG	GGGAAGACATAGACATGTCCTGGCATATGGGCCCTCGGCAAATATCCAGCTCTACTATATG
rs10910548	chr1:228965171	TGGTAAAGCCATCTGTAATCTCTGAGCCTCAGTTTCCTATCTGTAAAGTGGGAATAATTTT	TGGTAAAGCCATCTGTAATCTCTGAGCCTCGGTTTCCTATCTGTAAAGTGGGAATAATTTT
rs7535469	chr1:228966562	ATATTTACTTGAGTTATAAGATACTGAGTTTTGCTGAACAGTTTTATGTGGTTTATTGTCT	ATATTTACTTGAGTTATAAGATACTGAGTTCTGCTGAACAGTTTTATGTGGTTTATTGTCT
rs2388247	chr13:29324353	TTGTCTAGATATTTCCAAGTCCATAGTTACGTGATTTTCCATGGCCTTTGTTACTTGGTTG	TTGTCTAGATATTTCCAAGTCCATAGTTACATGATTTTCCATGGCCTTTGTTACTTGGTTG
rs9551753	chr13:29329468	ACTCTGCTATACTCTAAGTAAAGATACAATCCAAGTAAAAATGAGTGTTTGCTATACAAAC	ACTCTGCTATACTCTAAGTAAAGATACAATACAAGTAAAAATGAGTGTTTGCTATACAAAC
rs278042	chr13:29330144	GGAACAGTTGGAGAATGAGTAAGGGCTGCCGGTGTTGGTCCCCACCCCAGAGGGGAGAAAC	GGAACAGTTGGAGAATGAGTAAGGGCTGCCAGTGTTGGTCCCCACCCCAGAGGGGAGAAAC
rs1660703	chr2:101327249	GTGTAAGACTAGAAATTAACCGTGGTTATGTGAAATGTGTGGTATATTTGCATTTACTAAA	GTGTAAGACTAGAAATTAACCGTGGTTATGAGAAATGTGTGGTATATTTGCATTTACTAAA
rs2074301	chr19:19242715	TTCAAATCTCTTTGAGGTCTCCAGTCTGATGGGAGCTCTTAAAGGGCCCCCAGTCTGATGG	TTCAAATCTCTTTGAGGTCTCCAGTCTGATAGGAGCTCTTAAAGGGCCCCCAGTCTGATGG
rs2074303	chr19:19242755	AAAGGGCCCCCAGTCTGATGGAGGAGGCCCCTTAATGGCCCCCAAGTCTGAGGGTGGAGGC	AAAGGGCCCCCAGTCTGATGGAGGAGGCCCTTTAATGGCCCCCAAGTCTGAGGGTGGAGGC
rs4970466	chr1:26533454	TAATCGCTCATTAAAGGTAACTATCATTGTGATTATTCTCCTCATCCTGTTCCACCTGTTA	TAATCGCTCATTAAAGGTAACTATCATTGTAATTATTCTCCTCATCCTGTTCCACCTGTTA
rs11247963	chr1:26539543	TGACCTGAAAGGACCCCCTTCAAGTGATAGGGCAGAGCACAGATTGCAAAAACGCATATTA	TGACCTGAAAGGACCCCCTTCAAGTGATAGAGCAGAGCACAGATTGCAAAAACGCATATTA
rs960177	chr16:69943326	TCCAGATCCACCAATGTGCTTGGCTAATCTAGAAGAGTCCCTTCATCTTCTCTGAGCTGAG	TCCAGATCCACCAATGTGCTTGGCTAATCTGGAAGAGTCCCTTCATCTTCTCTGAGCTGAG
rs460126	chr9:133895433	AAATCCAGCATGTGGTTTGCACTGATAGCGGACTTCAGTTTGAACCCTAAATTTTCATCAG	AAATCCAGCATGTGGTTTGCACTGATAGCGTACTTCAGTTTGAACCCTAAATTTTCATCAG
rs11202571	chr10:89564534	TGGATTTTTAAATGTTAAGTAAACAAATACATTTAAAGCTCCTCTTGCAAACTAGAAGTAG	TGGATTTTTAAATGTTAAGTAAACAAATACTTTTAAAGCTCCTCTTGCAAACTAGAAGTAG
rs2306157	chr10:89568255	ACTCTCAAGAAGGCTGCCCGATTTGTCAGGGTTGCGCCCCGAGCCCGCGAGAAGGGCAGGG	ACTCTCAAGAAGGCTGCCCGATTTGTCAGGTTTGCGCCCCGAGCCCGCGAGAAGGGCAGGG
rs12762731	chr10:89569626	GAAAGGGATGCATGAATGTTGAAAACTATGATTAAGTTCATGGACAGGAATCAGAATGGAA	GAAAGGGATGCATGAATGTTGAAAACTATGGTTAAGTTCATGGACAGGAATCAGAATGGAA
rs3816651	chr10:89570897	CTTGATTGCAGAGCAAACTAGCTACACTCCATTTAATAACAAAAGTGGAAAATTCAGCACC	CTTGATTGCAGAGCAAACTAGCTACACTCCGTTTAATAACAAAAGTGGAAAATTCAGCACC
rs1871055	chr10:89571955	TGATATTTTTAAAAGAACAAAGGTAACCAAGTGAATTATACTGGCATAATTACTGTTATAT	TGATATTTTTAAAAGAACAAAGGTAACCAATTGAATTATACTGGCATAATTACTGTTATAT
rs11202575	chr10:89573696	CATATGTGAAACTAAAATGAACAAGAATAATTTGAGGTCTTTTATCTTCTAAGCACAAGTA	CATATGTGAAACTAAAATGAACAAGAATAAATTGAGGTCTTTTATCTTCTAAGCACAAGTA
rs2276648	chr2:96393229	GCGCCCCAGAAGTGCGGGGCGGGGCGTGTCTGGGGCGTGTCCCTGCCGTGTGCGCGCGGCT	GCGCCCCAGAAGTGCGGGGCGGGGCGTGTCCGGGGCGTGTCCCTGCCGTGTGCGCGCGGCT
rs2276649	chr2:96393283	CGCGGCTTTCCGCACCCTTCTGAGCGGGATATGTGGGCCTGGTGCGTCTGGGTCCCCGAAT	CGCGGCTTTCCGCACCCTTCTGAGCGGGATGTGTGGGCCTGGTGCGTCTGGGTCCCCGAAT
rs4907310	chr2:96401987	ATGCCTGGCCTGAATGGGTACTTTTAAAAACGAAAACTGATGATATTAGTGAAAAAGCAAA	ATGCCTGGCCTGAATGGGTACTTTTAAAAATGAAAACTGATGATATTAGTGAAAAAGCAAA
rs323354	chr8:30833808	AAATGTTTGAAAATAAAAGACATGTAAGATATTATAGAGAAAATTATAAAATTGAAATACG	AAATGTTTGAAAATAAAAGACATGTAAGATGTTATAGAGAAAATTATAAAATTGAAATACG
rs2623074	chr3:20052418	ATTTTCAAGGTGCTTGAAACAATAAATTCTCATGTGCTGCTTTGGAAAAGTAGAAAGTCAT	ATTTTCAAGGTGCTTGAAACAATAAATTCTTATGTGCTGCTTTGGAAAAGTAGAAAGTCAT
rs2948080	chr3:20054493	ACCTAATTATGGAAAAGCAATAAGCCTCCTGAATCCTTTGCCCTTGAAATTTCCTTGCCTG	ACCTAATTATGGAAAAGCAATAAGCCTCCTCAATCCTTTGCCCTTGAAATTTCCTTGCCTG
rs12639078	chr3:20054882	ATTGCGCACTGTGCCCATTACCTAGACTCTATTATATGGACCCCTATTTGCTTTATCATAT	ATTGCGCACTGTGCCCATTACCTAGACTCTGTTATATGGACCCCTATTTGCTTTATCATAT
rs734249	chr6:170811650	CCTGAGGTGGACACCAGCAGGGAAGGTTTGCGGGAGGGCTCTGCCTCCCTGGCGGCCACCC	CCTGAGGTGGACACCAGCAGGGAAGGTTTGAGGGAGGGCTCTGCCTCCCTGGCGGCCACCC
rs4507568	chr6:170814276	TCAGGAGGTCCTGACGACATGTACCTAAGATAGTCAGAGCACAGGGTGGTTTTATACATTT	TCAGGAGGTCCTGACGACATGTACCTAAGACAGTCAGAGCACAGGGTGGTTTTATACATTT
rs4710732	chr6:170821366	GACAGTTGGGGTCCTCCTCAGCATCAGTCTTGAGATGGCTGCAACCAGGGGGTCCTCAGGA	GACAGTTGGGGTCCTCCTCAGCATCAGTCTCGAGATGGCTGCAACCAGGGGGTCCTCAGGA
rs784742	chr3:131166365	GGGGTGGGAGTGGGCAATAAATGTCTTGCCGCCAGGAAGCCGACAGATGCGGCGGATCGGA	GGGGTGGGAGTGGGCAATAAATGTCTTGCCACCAGGAAGCCGACAGATGCGGCGGATCGGA
rs784718	chr3:131169716	GTTTGCTCTAAAGGACCTGGAAGTGACCGAACTCCAGTTGCCAGGCTGGGCTCTATCTTCC	GTTTGCTCTAAAGGACCTGGAAGTGACCGAGCTCCAGTTGCCAGGCTGGGCTCTATCTTCC
rs2670899	chr3:131173753	TCCTTCTTATGTTCTTAGACAAGACCCATGAAGAAGGAAACCTAGAAGCCAGGGAAAGAGA	TCCTTCTTATGTTCTTAGACAAGACCCATGCAGAAGGAAACCTAGAAGCCAGGGAAAGAGA
rs784707	chr3:131176035	GGATGGGGCGCCGGCGCGGGGTCGTTTCTGCACCACCTCTGGAGATCTGTTGACGAGAACA	GGATGGGGCGCCGGCGCGGGGTCGTTTCTGTACCACCTCTGGAGATCTGTTGACGAGAACA
rs4733518	chr8:30793453	TGTTATTCTGTTTACCTCTCTCCTTTTGGTTAAATAATTAAAAAGAAATCTTCCACAGATT	TGTTATTCTGTTTACCTCTCTCCTTTTGGTCAAATAATTAAAAAGAAATCTTCCACAGATT
rs4321246	chr17:16966721	CAAAGGGAGCTATTTTATAGCAGGTCCTCAGTACGTACCTGGACCTGTCTTCCAAGAGTGC	CAAAGGGAGCTATTTTATAGCAGGTCCTCACTACGTACCTGGACCTGTCTTCCAAGAGTGC
rs4074819	chr17:16967980	AAGATTTCACAGTTACACTCCCTTTTATGCCCTCTTCAATATTACTTACTGTGAGGCGGGC	AAGATTTCACAGTTACACTCCCTTTTATGCTCTCTTCAATATTACTTACTGTGAGGCGGGC
rs1877631	chr17:16970728	CTGAGGAAGGGTCGTGGGCTGGAAGAAGGCGGCAGAGAGTCACCCAGAGGCCAGCCAATGG	CTGAGGAAGGGTCGTGGGCTGGAAGAAGGCAGCAGAGAGTCACCCAGAGGCCAGCCAATGG
rs2292526	chr17:16971200	GGGGAGGGCGTGCCCAGGTCATATGATTCAGGGACTGATCCCCTTCCAGGTGGAGGGGCAG	GGGGAGGGCGTGCCCAGGTCATATGATTCACGGACTGATCCCCTTCCAGGTGGAGGGGCAG
rs7877342	chrX:152621939	CCCGGAGGGCTTCTCATGTTCTCATATGAACGTGGTATTTTCCTTCTGTCTTTCGTTGTTG	CCCGGAGGGCTTCTCATGTTCTCATATGAATGTGGTATTTTCCTTCTGTCTTTCGTTGTTG
rs846912	chr1:206230063	TGAAAGAGAAGAGTGACATGGCCAAGTCTGCACTTTTTAAAAAGACTACACTGGCTTGAAG	TGAAAGAGAAGAGTGACATGGCCAAGTCTGGACTTTTTAAAAAGACTACACTGGCTTGAAG
rs4844486	chr1:206232912	CCAGTGCCAGCCTGTAGAGTACAAGCCCCAAAGGCAACTGAAATTCACAGAAAGGAGAGAT	CCAGTGCCAGCCTGTAGAGTACAAGCCCCACAGGCAACTGAAATTCACAGAAAGGAGAGAT
rs4844487	chr1:206233287	GAAATGATCTTGGCCTTTAAACAGGCAGTTGACAATAAAAAATTAAATTTTAGGAAGATTC	GAAATGATCTTGGCCTTTAAACAGGCAGTTAACAATAAAAAATTAAATTTTAGGAAGATTC
rs932374	chr1:206236827	CGCTGACACCAGTAAGAAGGTTGCCGCCATGTCAGAGATGTCCGCGGACACCTCCCTGGGC	CGCTGACACCAGTAAGAAGGTTGCCGCCATATCAGAGATGTCCGCGGACACCTCCCTGGGC
rs762650	chrX:152566049	TCAGCCCCATGCCTATAACCTGCTACCCACAGACAAAGAGAGGCCATCAGGTACCCGGGCT	TCAGCCCCATGCCTATAACCTGCTACCCACGGACAAAGAGAGGCCATCAGGTACCCGGGCT
rs762651	chrX:152566285	CCGGCTCCACCCTCGCCTCTCCATTCCCTTGTCCTTGAAGTGGCCAGAGTGATCTTTTGCT	CCGGCTCCACCCTCGCCTCTCCATTCCCTTATCCTTGAAGTGGCCAGAGTGATCTTTTGCT
rs762652	chrX:152566659	CTCCCTCATGTCTGGCTATGGAGCAGCCCACGACAGGCACCTTGCAAATGGTGGAGAGGAA	CTCCCTCATGTCTGGCTATGGAGCAGCCCATGACAGGCACCTTGCAAATGGTGGAGAGGAA
rs1058359	chr10:124900067	GCCAGGCCCTCAGAGGCTTTGGACAATTACTAAATTGCTTCTTTTCGTTTCCCTCATCCCG	GCCAGGCCCTCAGAGGCTTTGGACAATTACCAAATTGCTTCTTTTCGTTTCCCTCATCCCG
rs3763740	chr10:124903057	GTAGCTGTCGTTTCAGGACCCTTCAAAAAAGAGCTCTAAAAGAAGTGGTGGGAGCTTTAAC	GTAGCTGTCGTTTCAGGACCCTTCAAAAAACAGCTCTAAAAGAAGTGGTGGGAGCTTTAAC
rs3763741	chr10:124903156	TGAAGGGGGGTTCCTGAAGGGCAAAGGCTGGTCTGATTACATGCATCTTTCCAGAGCCTCT	TGAAGGGGGGTTCCTGAAGGGCAAAGGCTGTTCTGATTACATGCATCTTTCCAGAGCCTCT
rs3808961	chr10:124903639	CCAGAATGCCATACGCAGGCGGGAGAGGGCATGAACAGAGCCTTGGCGCGATGCTCCTTGG	CCAGAATGCCATACGCAGGCGGGAGAGGGCTTGAACAGAGCCTTGGCGCGATGCTCCTTGG
rs7224755	chr17:24591919	GATCATGGGATGCTCCAGACAAAAGCAAGAGGAGACTAGGGTTGGCAGATAAAACGCAGGA	GATCATGGGATGCTCCAGACAAAAGCAAGATGAGACTAGGGTTGGCAGATAAAACGCAGGA
rs16964930	chr17:24592638	CCCATCCTGCTTATTCCCACACAACAAAAGCGCTGCTCAGCCGCCTGGCCAGCTCCATTGT	CCCATCCTGCTTATTCCCACACAACAAAAGTGCTGCTCAGCCGCCTGGCCAGCTCCATTGT
rs2041156	chr17:24592906	AATGAGACAACTGGCTGTCCAGCGGGGTGCACTGTTAGATTTAGAGGTGATATCTGACATT	AATGAGACAACTGGCTGTCCAGCGGGGTGCGCTGTTAGATTTAGAGGTGATATCTGACATT
rs9913225	chr17:24594748	AGAAAAATATACTATGAAAAGTCTTGTCCTGTATCTGAGGCCCAAGTGCCTCAGTTTCCCC	AGAAAAATATACTATGAAAAGTCTTGTCCTATATCTGAGGCCCAAGTGCCTCAGTTTCCCC
rs1638005	chr17:24597223	GCCACCACAACAGTGCTATTTTCACCTCCATTTTCCAGATTAAGAAACTAAGAGAACAATC	GCCACCACAACAGTGCTATTTTCACCTCCACTTTCCAGATTAAGAAACTAAGAGAACAATC
rs4746097	chr10:73286581	AGACATAATGGCAGGAGCTCAAGCATCCATCCTGGACCATGAGGTAGAAGCCTCTTTAAGG	AGACATAATGGCAGGAGCTCAAGCATCCATTCTGGACCATGAGGTAGAAGCCTCTTTAAGG
rs12416292	chr10:73287762	CTTTCCTTTTTTATATCTTCTGTCTCCCTCTGTACACTGACTTTTCCCTGTCAGACTATAA	CTTTCCTTTTTTATATCTTCTGTCTCCCTCGGTACACTGACTTTTCCCTGTCAGACTATAA
rs10902929	chr10:124450059	GTAAACAATTGTCCTGAGACCCTGTTCAAAGGTGTGGTTAAGAATGGCACTGGTGGGAATT	GTAAACAATTGTCCTGAGACCCTGTTCAAAAGTGTGGTTAAGAATGGCACTGGTGGGAATT
rs12266077	chr10:124452586	TTCCCACCAGTAGTGTATGAGAATCCCTGTGGATACTCATCTTGCCGATACAGGTAGATTG	TTCCCACCAGTAGTGTATGAGAATCCCTGTTGATACTCATCTTGCCGATACAGGTAGATTG
rs4980233	chr10:124455530	AGGGCATCTGTTAAATTTGAATTTCAGATATGTCTCATTTACTTATACAAAGAATTTTTCA	AGGGCATCTGTTAAATTTGAATTTCAGATACGTCTCATTTACTTATACAAAGAATTTTTCA
rs7085188	chr10:124457100	CTTTTTGATTTGGAATATTTTTAGATTAATCGACAAAGTACCCCACGCTATATATGTGGAG	CTTTTTGATTTGGAATATTTTTAGATTAATGGACAAAGTACCCCACGCTATATATGTGGAG
rs748120	chr3:15010443	TGTACCTCAGGCAAGGTAGCAAAGCCAAGGGACAGCAGTCTCAGCGCCCAACCTGTGCTTT	TGTACCTCAGGCAAGGTAGCAAAGCCAAGGAACAGCAGTCTCAGCGCCCAACCTGTGCTTT
rs1105922	chr3:15011244	TTTTTTTTTTTAAAGAATGAATAGGTTGGGTGTGGCAGCTCACATCTGCAGACCCAGCACT	TTTTTTTTTTTAAAGAATGAATAGGTTGGGCGTGGCAGCTCACATCTGCAGACCCAGCACT
rs6805692	chr3:15017040	ACAAACTGATTTCAAATCTTTTTGGGTAAACACCCAGAAGTGTGATTGCTGGATTCCACAC	ACAAACTGATTTCAAATCTTTTTGGGTAAATACCCAGAAGTGTGATTGCTGGATTCCACAC
rs6442492	chr3:15018988	CTTTATATACCACTGGATTTGGTTTGCTAGAGTTTTGTAGAGGATTGTTTGTGTTTCTATT	CTTTATATACCACTGGATTTGGTTTGCTAGTGTTTTGTAGAGGATTGTTTGTGTTTCTATT
rs2011249	chr11:113273848	AATTAACAAATGAACAGAAAAGAATTCTGGCTTATGCCAGAAAGATGATGCCAAGAGGAAT	AATTAACAAATGAACAGAAAAGAATTCTGGTTTATGCCAGAAAGATGATGCCAAGAGGAAT
rs1176758	chr11:113275565	ACTACTAAATAGTTTTTAATTACTGCTATACCAGTAAATCCCATAAATATGCAAATGCAAT	ACTACTAAATAGTTTTTAATTACTGCTATATCAGTAAATCCCATAAATATGCAAATGCAAT
rs3891484	chr11:113277799	GCAGAAGCATCCCTTTATGCAAAGGTTTAATTGAGGCGATGATCGACATTGCATTCTTGCC	GCAGAAGCATCCCTTTATGCAAAGGTTTAACTGAGGCGATGATCGACATTGCATTCTTGCC
rs3758987	chr11:113280485	ATTTCCTTTACAGCCTTTACCTAAGGCAGTACTCTTGCTGACATTCAGGACACTAATTTCA	ATTTCCTTTACAGCCTTTACCTAAGGCAGTGCTCTTGCTGACATTCAGGACACTAATTTCA
rs12741079	chr1:44340291	AAATTGTAGCTCATTCTTGTTTTTCTATGGTTATTGCTCTATCTGGTTCTCCAACTCTTTT	AAATTGTAGCTCATTCTTGTTTTTCTATGGGTATTGCTCTATCTGGTTCTCCAACTCTTTT
rs2838536	chr21:44507805	AGCCCAGCCTCTCCAGGAGTGAACTGGGTCGGAGCAGAGGCGGCCCAGTGCCTGAGCCCTC	AGCCCAGCCTCTCCAGGAGTGAACTGGGTCCGAGCAGAGGCGGCCCAGTGCCTGAGCCCTC
rs2838538	chr21:44511699	CATACCGTGTGCCCTCTGCCCTCCAGCCCATGGTGCGGAAGACACTGTCTCACCTCTGCTT	CATACCGTGTGCCCTCTGCCCTCCAGCCCACGGTGCGGAAGACACTGTCTCACCTCTGCTT
rs2838539	chr21:44511838	TGAGGTGGTGATCACGGCAGGCGAAGGGGACGTGGTGACCCCTCCACATTCAGTGGCCACA	TGAGGTGGTGATCACGGCAGGCGAAGGGGATGTGGTGACCCCTCCACATTCAGTGGCCACA
rs2838540	chr21:44512009	TAGAGGTGGCGTGAGCTCTTGCGTCTCCTGATCTAGAGAGGACTGCAAGGCGCCCCAGGGC	TAGAGGTGGCGTGAGCTCTTGCGTCTCCTGGTCTAGAGAGGACTGCAAGGCGCCCCAGGGC
rs2838542	chr21:44515895	AGTCTGAGCCCTCGGTCCCGGCTTCCCGTTACTGGCTGGCCCATTATCTGCGGAGAGGGAC	AGTCTGAGCCCTCGGTCCCGGCTTCCCGTTGCTGGCTGGCCCATTATCTGCGGAGAGGGAC
rs686015	chr1:156985046	TTGCTTTGTATTCTTCTTCGATTGTTTAGTATGCTTGTCTTGACTTCTCCGTGAGGCTAAT	TTGCTTTGTATTCTTCTTCGATTGTTTAGTTTGCTTGTCTTGACTTCTCCGTGAGGCTAAT
rs2275073	chr1:152843893	GAAGGTCCTGTCCCTTTTTCGCTTCCCCCCCGCTGGAGCTGCTTCTCCCGCTTGCGGGAGC	GAAGGTCCTGTCCCTTTTTCGCTTCCCCCCAGCTGGAGCTGCTTCTCCCGCTTGCGGGAGC
rs17595984	chr5:125732110	CAGGCAGCTCATATCAAGAAGTGAAATTCACCGGGCAAGCCCCAGCTGGCTCCAGCCCTCA	CAGGCAGCTCATATCAAGAAGTGAAATTCATCGGGCAAGCCCCAGCTGGCTCCAGCCCTCA
rs10519910	chr5:125733062	AGAGATGCTATATTGACTCAAAAGATATTAGCTAGTACAGAGAGTCAATAAATATTAGCCT	AGAGATGCTATATTGACTCAAAAGATATTAACTAGTACAGAGAGTCAATAAATATTAGCCT
rs7702112	chr5:125734183	CTGAACTTATTTGTTAGTAAAATGCATATCTAGGTAACAATAATGACACATAATTGCAAAT	CTGAACTTATTTGTTAGTAAAATGCATATCCAGGTAACAATAATGACACATAATTGCAAAT
rs7556661	chr1:147705082	TGGGACCAGAAATTTAAAATTTCTAACAAGCTCCCTGATTGCACACTGAGTAGCAAGACCT	TGGGACCAGAAATTTAAAATTTCTAACAAGTTCCCTGATTGCACACTGAGTAGCAAGACCT
rs11581757	chr1:147705317	AAAGAATGTAACTAGTAGAAATATAATTCAATCAGAGCAAAGATAAAGGGAATTTTTTTAT	AAAGAATGTAACTAGTAGAAATATAATTCAGTCAGAGCAAAGATAAAGGGAATTTTTTTAT
rs5987128	chrX:152460575	GCTCCCTCTGGCTCCACCATTAATCCCTCACCCTCGCTTTCTTCTCTACCCAGCAGCCAGA	GCTCCCTCTGGCTCCACCATTAATCCCTCATCCTCGCTTTCTTCTCTACCCAGCAGCCAGA
rs2105662	chr21:44522183	TGGGTTGTTTCTACCCTTTGGCTGTTGTAAATGGTGCTGCTATGAACATTGGTGTACAAGC	TGGGTTGTTTCTACCCTTTGGCTGTTGTAAGTGGTGCTGCTATGAACATTGGTGTACAAGC
rs2850161	chr21:44522990	TTTTTCAAATGTTCACTGGGGGGATTTTTCTCTCTCCTGACAGTGTCCTTTACTGTATAAA	TTTTTCAAATGTTCACTGGGGGGATTTTTCGCTCTCCTGACAGTGTCCTTTACTGTATAAA
rs909424	chr21:44526192	GAACCTCCATCTGGAGCAGGGGAGAAGGCATGGAGTCCAGGCTTGTTTGAGGGGCCAAGGC	GAACCTCCATCTGGAGCAGGGGAGAAGGCACGGAGTCCAGGCTTGTTTGAGGGGCCAAGGC
rs2018054	chr21:44528088	AACAATCTGATCTCTCTTTCTTTTCCCCACAGCCTCAAAGGAGAGGAAAGCCAAGTTGCTG	AACAATCTGATCTCTCTTTCTTTTCCCCACCGCCTCAAAGGAGAGGAAAGCCAAGTTGCTG
rs4970987	chr1:147762755	AACTGAAGACTGGTTAACTTTTTTTTCTTTTTTTTAAGATAGCAGTGGGGAGGGGAAGTTC	AACTGAAGACTGGTTAACTTTTTTTTCTTTCTTTTAAGATAGCAGTGGGGAGGGGAAGTTC
rs3754211	chr1:147764930	CAGCTCCGCAGCCGGGGTCCCCCTGGCCCTCGGCTTTCTGTACCCTTCAGAGTTTCTTCTG	CAGCTCCGCAGCCGGGGTCCCCCTGGCCCTTGGCTTTCTGTACCCTTCAGAGTTTCTTCTG
rs3754210	chr1:147767334	CTCCCTTGACTGCTGCCTTACTAGAGCCAGCTGACCTAGGTGGAGAGTGCCCAGGGATTGT	CTCCCTTGACTGCTGCCTTACTAGAGCCAGATGACCTAGGTGGAGAGTGCCCAGGGATTGT
rs4745707	chr10:74389968	CTCAAAGATGTTTCAGAACTACTTTATGAGCCACATAGCCTGTTCCACTGCACTGAGGCTA	CTCAAAGATGTTTCAGAACTACTTTATGAGGCACATAGCCTGTTCCACTGCACTGAGGCTA
rs3757095	chr6:8048002	CGAACTGTTGGGGAGCTAGTTACTGGTAGAAAGGCCCCAAGGCCGGGCTTCGGTGGCTGCA	CGAACTGTTGGGGAGCTAGTTACTGGTAGAGAGGCCCCAAGGCCGGGCTTCGGTGGCTGCA
rs3757098	chr6:8048825	ATAAGGAAAAGAAACTTTTGCCAAATCAACATAACAAAATACAAAAGAAATTTCAGTATAA	ATAAGGAAAAGAAACTTTTGCCAAATCAACGTAACAAAATACAAAAGAAATTTCAGTATAA
rs1316319	chr6:8051027	TAATAAAAGTAACTTGATGAATTGATTTTGTCAAATAGAACACTTCTCTAATCTGCTATTA	TAATAAAAGTAACTTGATGAATTGATTTTGCCAAATAGAACACTTCTCTAATCTGCTATTA
rs17143363	chr6:8051101	TTAAATCCACAGTACCTTAGGATATAAATTAAATGTCAAATGAAATTAATTTGGCAAGTGG	TTAAATCCACAGTACCTTAGGATATAAATTGAATGTCAAATGAAATTAATTTGGCAAGTGG
rs2327020	chr6:8053609	GAGCACTCATAACAGCCTTGGGAATGCTCCTGCCACAAGACAGACCCCACTGTGCTGAGGC	GAGCACTCATAACAGCCTTGGGAATGCTCCCGCCACAAGACAGACCCCACTGTGCTGAGGC
rs6923256	chr6:8054930	CTCCCTACAAAGAAATTTGCCATACTTCATTGCACCTATTTATTCACATTTTGGACTCTTC	CTCCCTACAAAGAAATTTGCCATACTTCATCGCACCTATTTATTCACATTTTGGACTCTTC
rs2039520	chr6:8055993	ATCTTAGAATCTTTTGTAAACTTCAGTTCACTTTAGACTTTTTCTTTCTCTATAACATTCA	ATCTTAGAATCTTTTGTAAACTTCAGTTCATTTTAGACTTTTTCTTTCTCTATAACATTCA
rs6903717	chr6:8057344	GTCTTTTTCACATTGAAAAATTTTGCTTTCAGGCTTTTTTTGAGATTAAAATGGCATTTGA	GTCTTTTTCACATTGAAAAATTTTGCTTTCGGGCTTTTTTTGAGATTAAAATGGCATTTGA
rs764271	chr19:4679964	GCAGCTTAGTTAACAGGGAAGCATTAGAAGACCGACAATAGGGGATTGGTTAATTAGTTGC	GCAGCTTAGTTAACAGGGAAGCATTAGAAGTCCGACAATAGGGGATTGGTTAATTAGTTGC
rs7970670	chr12:93975626	CTCTCTCACTCTCTTTAGATTTAGAACTGGCTCATGATTCAGCCAGGTCTTAGAAGATAGA	CTCTCTCACTCTCTTTAGATTTAGAACTGGTTCATGATTCAGCCAGGTCTTAGAAGATAGA
rs1800702	chr6:26194442	CGAGGAGATTATTATAGCCGGAGCTCTGAACCAGCAATCTCAGTTCTTGTGATAGTGAGCA	CGAGGAGATTATTATAGCCGGAGCTCTGAAGCAGCAATCTCAGTTCTTGTGATAGTGAGCA
rs7081481	chr10:74317830	GCTCCTGGACTCAAGAAAATTGTTCAAAGACGCACCAAAATTAAGTATTCATTATTTTCAG	GCTCCTGGACTCAAGAAAATTGTTCAAAGATGCACCAAAATTAAGTATTCATTATTTTCAG
rs7378823	chr5:23551786	ACCACACTTTTCTGATCGCTGTAGCTTTGTAATATGCTTTGAAATCAGGAACTATGAGGCC	ACCACACTTTTCTGATCGCTGTAGCTTTGTTATATGCTTTGAAATCAGGAACTATGAGGCC
rs7251826	chr19:40424085	CATTCAAAGAAAAAATAAATAAACAATACCTGAGGAAGCCCAGGTGGTAGACTTACTAGAC	CATTCAAAGAAAAAATAAATAAACAATACCCGAGGAAGCCCAGGTGGTAGACTTACTAGAC
rs2861485	chr19:40430240	TTTTATAAAATTTCAACCCGTTCACGTCCCTTCATCGTTTAAAAAAATATTTTTATGATAA	TTTTATAAAATTTCAACCCGTTCACGTCCCATCATCGTTTAAAAAAATATTTTTATGATAA
rs1375194	chr2:33738528	GACCCTAGAAGGGTTTTAAGTTGGTATTTTATATTCTTTTTTGAGAAAGAATCTAGAATCA	GACCCTAGAAGGGTTTTAAGTTGGTATTTTGTATTCTTTTTTGAGAAAGAATCTAGAATCA
rs6757234	chr2:33740992	TATTACTAAAGAATGCTGTTTTTTCAAATCATTCCTCTGGCTATGTTAGTATAGTTTCTGA	TATTACTAAAGAATGCTGTTTTTTCAAATCTTTCCTCTGGCTATGTTAGTATAGTTTCTGA
rs10173763	chr2:33741970	TGGGAGAAGCCTTCTCTAACTGCCTTGGGCACTCATTCTCTCCTCCCAAGCCTTCCTTAGC	TGGGAGAAGCCTTCTCTAACTGCCTTGGGCGCTCATTCTCTCCTCCCAAGCCTTCCTTAGC
rs6543722	chr2:33744174	AGACATGTAAAAACCCTGAAAAGATATCTCCGAAGGCCACTCTTAGATTCTACAATAGATA	AGACATGTAAAAACCCTGAAAAGATATCTCAGAAGGCCACTCTTAGATTCTACAATAGATA
rs3807917	chr7:18390154	AGGAAACTGCAAATGACTTGTGATTGGACTCTACAAGGCACAGGTGGAATGAAAGGTCAGA	AGGAAACTGCAAATGACTTGTGATTGGACTTTACAAGGCACAGGTGGAATGAAAGGTCAGA
rs1615309	chr7:18393174	GTTCAATAGTTATTCCTTCTTTTTAATGTTCATAAGCTCCTGTGATTTTCAAGAAACATTT	GTTCAATAGTTATTCCTTCTTTTTAATGTTTATAAGCTCCTGTGATTTTCAAGAAACATTT
rs1629017	chr7:18393405	AAGATGAGTCCAAATAAAGCTAGCTTCATCGTAGTCCTTTCTTACATGTGTCACAAGGTCT	AAGATGAGTCCAAATAAAGCTAGCTTCATCATAGTCCTTTCTTACATGTGTCACAAGGTCT
rs1726597	chr7:18394870	CTGGTCAATCCATGGCAAAATAACCAATGTAAGCAACCCAAGATTGATATCAGTCTGCATG	CTGGTCAATCCATGGCAAAATAACCAATGTGAGCAACCCAAGATTGATATCAGTCTGCATG
rs723157	chr7:18395608	ATTGAACTGTTTTTTTCCCTATTCAGTATTGTCTCCTGGAGATATAATCCTAGAGTTGGCA	ATTGAACTGTTTTTTTCCCTATTCAGTATTATCTCCTGGAGATATAATCCTAGAGTTGGCA
rs2520458	chr7:18396169	ACGGATGAGGGAACAGAGGCCTAGGGAAATTAATAACATCTTCAATGTTACACACATGAAA	ACGGATGAGGGAACAGAGGCCTAGGGAAATGAATAACATCTTCAATGTTACACACATGAAA
rs2073973	chr7:18397913	AGTCACCTGTTTGTAAAAGGAAATTGTGGAGGATTCATGGCAGAGTGCAAATTGCTGAATG	AGTCACCTGTTTGTAAAAGGAAATTGTGGAAGATTCATGGCAGAGTGCAAATTGCTGAATG
rs2073974	chr7:18398040	AATGGCTAGAGTCATTGGCATAAAATTTGTTGTACAGGGTCTTATACTTTTTATTTGTTTC	AATGGCTAGAGTCATTGGCATAAAATTTGTCGTACAGGGTCTTATACTTTTTATTTGTTTC
rs6714742	chr2:27278059	GAATCCATTATAGGGTGTGATACCTGCAGCCTTTTCTCAGCCACCTACACATTCCTTCCAG	GAATCCATTATAGGGTGTGATACCTGCAGCATTTTCTCAGCCACCTACACATTCCTTCCAG
rs1275513	chr2:27282621	TCCTGAGTTGCATCACATCCTCCAAGAGCTAGTTAGGAGAAGGCGGGCTGAAGGAATCGCG	TCCTGAGTTGCATCACATCCTCCAAGAGCTGGTTAGGAGAAGGCGGGCTGAAGGAATCGCG
rs4848490	chr2:118550782	AACTAAATCAAAGCAATTAAAGGACTACCCCTTATTCTGAGACAGTGTCCTTCCTTGTTTT	AACTAAATCAAAGCAATTAAAGGACTACCCTTTATTCTGAGACAGTGTCCTTCCTTGTTTT
rs7566605	chr2:118552255	CTGCCAAGTACTTAACAATGGATATTTGATCGTGGTCCTTTAGGTCTGTACCAGGGTGGTT	CTGCCAAGTACTTAACAATGGATATTTGATGGTGGTCCTTTAGGTCTGTACCAGGGTGGTT
rs2422166	chr2:118552906	ATCTAGGATGCACCTCTAGACATTTTAGCTCGGAGCTGAGCTAGGGGCTAGAAAGATTACG	ATCTAGGATGCACCTCTAGACATTTTAGCTTGGAGCTGAGCTAGGGGCTAGAAAGATTACG
rs17047718	chr2:118553542	TGTCATTTAATCCCCTCATAATCTCCAATTATCACATAAAATTAATTGAAGTTCAAAGATG	TGTCATTTAATCCCCTCATAATCTCCAATTGTCACATAAAATTAATTGAAGTTCAAAGATG
rs2161830	chr2:118554511	CTGACCCAATTACACTGGTATTGTTTGTAGTGTGCAGTCATGAATGCTTGCACTCCACAGC	CTGACCCAATTACACTGGTATTGTTTGTAGCGTGCAGTCATGAATGCTTGCACTCCACAGC
rs17047728	chr2:118555247	ACAGGCCCCTGTCCTTAGTGTTGCATTATCGAAAATGTTTATTACAAATAAGGTTCTGATG	ACAGGCCCCTGTCCTTAGTGTTGCATTATCAAAAATGTTTATTACAAATAAGGTTCTGATG
rs17047731	chr2:118556963	AGATAAGAATACATACATTGTCTTCGGGAGGGACCTAACATTATATAAACCCCATTATGTG	AGATAAGAATACATACATTGTCTTCGGGAGAGACCTAACATTATATAAACCCCATTATGTG
rs7585120	chr2:118557012	CCCCATTATGTGTGAGTTCAGTTTGAATGGCGTGTCCCAGAGATGAAACAACAGTACGGTG	CCCCATTATGTGTGAGTTCAGTTTGAATGGTGTGTCCCAGAGATGAAACAACAGTACGGTG
rs17047733	chr2:118557555	TGACATTATACATCCATTTCAAGATGTCCTTTACATTACTATACTTTTAAGCTTACTTACG	TGACATTATACATCCATTTCAAGATGTCCTCTACATTACTATACTTTTAAGCTTACTTACG
rs12997151	chr2:118557898	TATGTCTCATCTATTACATTTGCTATGTGGCCAAGGAAAGCCTGGAAAGTATTAAAAACTC	TATGTCTCATCTATTACATTTGCTATGTGGACAAGGAAAGCCTGGAAAGTATTAAAAACTC
rs6896999	chr5:78848006	ATTACCCACAGCGCTCACCCTAGTTTTTTACGTTGTTTTGTTTTGTTTTGTTTTTTGAGGC	ATTACCCACAGCGCTCACCCTAGTTTTTTATGTTGTTTTGTTTTGTTTTGTTTTTTGAGGC
rs4704560	chr5:78849506	GATGGCAATCTTCAATGGGGTGTTCATACACTGGTCATGAGATATGTCTTTTTCAATGAAA	GATGGCAATCTTCAATGGGGTGTTCATACATTGGTCATGAGATATGTCTTTTTCAATGAAA
rs6453455	chr5:78850856	TCAGAAATAAATGAAGATTCTCAACACTTGAGAGTTTCAGCCAAAATATTTCATGAATTAT	TCAGAAATAAATGAAGATTCTCAACACTTGGGAGTTTCAGCCAAAATATTTCATGAATTAT
rs2833447	chr21:31862340	AGACAGGCAGTTCTTAGCCTTACCATCTAATGGAGGTACTGCCCAGGCTGGAAGAATGGGA	AGACAGGCAGTTCTTAGCCTTACCATCTAACGGAGGTACTGCCCAGGCTGGAAGAATGGGA
rs2239528	chr6:31618084	CACGCAGGTCTTCTCTGTAGGCACCCCTCCATGGATGCGCGAGGAACGAGTGTGGCGAAGG	CACGCAGGTCTTCTCTGTAGGCACCCCTCCGTGGATGCGCGAGGAACGAGTGTGGCGAAGG
rs2523504	chr6:31618837	ACACAGCAGGACATCAGGTCTTACTTTTGTAGCTCCCCATCTCAAAGACGGGGATAGCAAA	ACACAGCAGGACATCAGGTCTTACTTTTGTGGCTCCCCATCTCAAAGACGGGGATAGCAAA
rs2251824	chr6:31619836	GGATAGCCATTTGGGCTGTTTAGGGAATATGTAAACAAAAAACAAGAAAGTGACTGAAGGC	GGATAGCCATTTGGGCTGTTTAGGGAATATATAAACAAAAAACAAGAAAGTGACTGAAGGC
rs2071594	chr6:31620699	TGATTAGGAATCATTCTGTAAAGTCTAGCACAGTTCCTTGCATGTTGTAGCAGTGATTCAG	TGATTAGGAATCATTCTGTAAAGTCTAGCAGAGTTCCTTGCATGTTGTAGCAGTGATTCAG
rs2239705	chr6:31621381	CCCCTCATATGCCTGGACCCTTGTCTGTTTCTGCTTTTCCCTTTCTCTCTTCCACCCCTCT	CCCCTCATATGCCTGGACCCTTGTCTGTTTTTGCTTTTCCCTTTCTCTCTTCCACCCCTCT
rs2523502	chr6:31621843	CAGCAGGCGGTGAGTTGAGGCAGAGTCGGGTTGAGACCCCACTGCAAGTTGGTGGGTGCAT	CAGCAGGCGGTGAGTTGAGGCAGAGTCGGGATGAGACCCCACTGCAAGTTGGTGGGTGCAT
rs4819646	chr22:16764834	CGTGAGCTCCAAGTGGAGGTGCTTACCGGGAAGTCGGTACAAATGTGAAGTTCAGGGAGTG	CGTGAGCTCCAAGTGGAGGTGCTTACCGGGCAGTCGGTACAAATGTGAAGTTCAGGGAGTG
rs2401424	chr22:16768088	CACTCTGCAAGGGGCTTACCCGGCATTCTCCTTGGCTCTGACAACAGCCGGGAAGCACAGC	CACTCTGCAAGGGGCTTACCCGGCATTCTCATTGGCTCTGACAACAGCCGGGAAGCACAGC
rs4819648	chr22:16768118	CTTGGCTCTGACAACAGCCGGGAAGCACAGCAGAGCAGGGCTATTTCTGTTACCGCCCCCA	CTTGGCTCTGACAACAGCCGGGAAGCACAGTAGAGCAGGGCTATTTCTGTTACCGCCCCCA
rs5746492	chr22:16768487	GGGCCTTGGCTGTGGAGGATGGCACTGCAGAGACGGCCTCTGAAGCACACGCAGGACATGG	GGGCCTTGGCTGTGGAGGATGGCACTGCAGGGACGGCCTCTGAAGCACACGCAGGACATGG
rs5747408	chr22:16771674	GTTAAACAAGACAGATAGAAGATACTGAGTCGTTACTACTCGGTGCCACATCCACGCCTAT	GTTAAACAAGACAGATAGAAGATACTGAGTTGTTACTACTCGGTGCCACATCCACGCCTAT
rs5746493	chr22:16772126	CAAAAGGCTAAGCAACTAAAACAGTGCTAACACAGTATGTATCAGTTGGCATTCTGCGGCA	CAAAAGGCTAAGCAACTAAAACAGTGCTAATACAGTATGTATCAGTTGGCATTCTGCGGCA
rs5747411	chr22:16773530	TTTCTATCGGTAATCAATGTCTATGCCCATATCATCTGCCTTCCCTCCAATGATAGCGAGC	TTTCTATCGGTAATCAATGTCTATGCCCATCTCATCTGCCTTCCCTCCAATGATAGCGAGC
rs5747413	chr22:16773571	TCCCTCCAATGATAGCGAGCGACATCTGCCGCATGTCTCGCTGAAGCCAGCCTCTGCCTGT	TCCCTCCAATGATAGCGAGCGACATCTGCCACATGTCTCGCTGAAGCCAGCCTCTGCCTGT
rs540224	chr1:157576443	GCAGCCACAACCACATACTCAGCTGTGTTGCTTCACCACCAGCCCCCAACCAACACTTCAT	GCAGCCACAACCACATACTCAGCTGTGTTGTTTCACCACCAGCCCCCAACCAACACTTCAT
rs1369836	chr8:23770067	AAGTTCATTATTCTTGTCCTGAAGGTACTTACAGGTGAGTTGGGAAGATGACCAGCCACAG	AAGTTCATTATTCTTGTCCTGAAGGTACTTGCAGGTGAGTTGGGAAGATGACCAGCCACAG
rs1436148	chr8:23777042	CTCTAGGAAAGGTAATAGAAAGTGTGTGTTTCCTTTAGGTCCTGGTAAACTCTACCTTCAA	CTCTAGGAAAGGTAATAGAAAGTGTGTGTTCCCTTTAGGTCCTGGTAAACTCTACCTTCAA
rs12037395	chr1:157645850	CACAAAGCCAGTTTCAAAATTGCATCCCGTTCTCTGCTTCAGCCCAAGAAGTCTTCCAATT	CACAAAGCCAGTTTCAAAATTGCATCCCGTCCTCTGCTTCAGCCCAAGAAGTCTTCCAATT
rs7410867	chr1:157645872	CATCCCGTTCTCTGCTTCAGCCCAAGAAGTCTTCCAATTCTCTGAATCCTATATGGAGAGA	CATCCCGTTCTCTGCTTCAGCCCAAGAAGTGTTCCAATTCTCTGAATCCTATATGGAGAGA
rs12036670	chr1:157645934	CCCCATGGGGGCCAAACAGCCAGTATCCCCAACTGTTCCATTCCAACAGACATTGTGGAGG	CCCCATGGGGGCCAAACAGCCAGTATCCCCGACTGTTCCATTCCAACAGACATTGTGGAGG
rs4656943	chr1:157646599	CTCTTTTGTCTTCTCCCAGAAGTGACATGGGCCTATTTTTGCTGCCTTCCCATCCATGCTT	CTCTTTTGTCTTCTCCCAGAAGTGACATGGACCTATTTTTGCTGCCTTCCCATCCATGCTT
rs12038419	chr1:157647080	CACCTTCACAAGGCAGTTTTCAGGATCAAATTAAAAATGATACTCCAGAATATGCACACAA	CACCTTCACAAGGCAGTTTTCAGGATCAAACTAAAAATGATACTCCAGAATATGCACACAA
rs955370	chr1:157648424	CCTGCCCTCGTGGAGTTTTTATCTTGCCCTTCCTAATTTTTGTGCAGAGAGTCCTTCTGTG	CCTGCCCTCGTGGAGTTTTTATCTTGCCCTGCCTAATTTTTGTGCAGAGAGTCCTTCTGTG
rs955371	chr1:157648656	AACCCCTGCCCAAACCATGCTTTCATCAAGCTTCGGTGAGTCAAGGTCATTCCAGTAAATC	AACCCCTGCCCAAACCATGCTTTCATCAAGTTTCGGTGAGTCAAGGTCATTCCAGTAAATC
rs10908807	chr1:157649787	GCTGTGATAACTTTCAGGTTCAGGTTAAAGGTAAGAGATGCAACAGTCTCATAAAGAAGAT	GCTGTGATAACTTTCAGGTTCAGGTTAAAGATAAGAGATGCAACAGTCTCATAAAGAAGAT
rs11265501	chr1:157650001	GAAACAGCTCTGACGATGCAGAGAACCGCAGGCTATCTCTCTGACACTAGCAATGTGGTGT	GAAACAGCTCTGACGATGCAGAGAACCGCAAGCTATCTCTCTGACACTAGCAATGTGGTGT
rs4656944	chr1:157650978	GTGGAGTATTTTATTCTACATCACATTGCTATTTTATTCTATTTCACATTGCTGTTTATCC	GTGGAGTATTTTATTCTACATCACATTGCTGTTTTATTCTATTTCACATTGCTGTTTATCC
rs869167	chr1:157652402	TTCCAACCTTCAATATTAATTTCTTCATCATCAGTAGGCCTATTACCAAGCCAATGCTACG	TTCCAACCTTCAATATTAATTTCTTCATCACCAGTAGGCCTATTACCAAGCCAATGCTACG
rs4656949	chr1:157654593	GTTTGCATTTCTCTAATGATTAGGGATGCTAAGCGTTTTTTCATATGCATATTAGGCATTT	GTTTGCATTTCTCTAATGATTAGGGATGCTGAGCGTTTTTTCATATGCATATTAGGCATTT
rs2184067	chr1:157655356	AGTCTTCTCAGTATCATTTGTTTGAAAACATTGCCCTTTCCCCATTGAATGGTCTTGGCAA	AGTCTTCTCAGTATCATTTGTTTGAAAACACTGCCCTTTCCCCATTGAATGGTCTTGGCAA
rs2151293	chr1:157655564	TGAGTCTTCAAGCTTAGTTCTTTTTCATGGTGGTTTTGGCTATTTGGAGTCTCTTGAGATT	TGAGTCTTCAAGCTTAGTTCTTTTTCATGGCGGTTTTGGCTATTTGGAGTCTCTTGAGATT
rs8075977	chr17:1607551	ACACAGGCGGGGCCAGATCACGAGGGTCCTTGCAGACCAGAGCAAGGGTTTGGATTTTATT	ACACAGGCGGGGCCAGATCACGAGGGTCCTCGCAGACCAGAGCAAGGGTTTGGATTTTATT
rs989910	chr14:74158311	GGCTTGGGAACATCTCTGATGGTGAGTGTAAGTGGCAAAGCTGCTGGTGGAGAGGGGTGGC	GGCTTGGGAACATCTCTGATGGTGAGTGTACGTGGCAAAGCTGCTGGTGGAGAGGGGTGGC
rs7503464	chr17:3654783	AGCAGTGGTACTCACGACCTTTGAACACTCGGTAGGAGTGCCCTGCTCAGTGCCAAGGCCT	AGCAGTGGTACTCACGACCTTTGAACACTCAGTAGGAGTGCCCTGCTCAGTGCCAAGGCCT
rs8071690	chr17:3656631	CTTGGTAGGTGAAATACCGCCTATACTCTCAAGTTTTATGGATAGTGCAGCCAAATTCCAC	CTTGGTAGGTGAAATACCGCCTATACTCTCTAGTTTTATGGATAGTGCAGCCAAATTCCAC
rs12096448	chr1:119395432	GCCTCCAGGCTGCGCAGCGCAGCCGCTATCGGGCGGACTGCAGTTCTTGCCGAGCAGGTGG	GCCTCCAGGCTGCGCAGCGCAGCCGCTATCAGGCGGACTGCAGTTCTTGCCGAGCAGGTGG
rs6699136	chr1:119399054	TTCATAATTATGGACTATAGTTCTCTGTACATGTTCTCTGACCATGCCATCTTATGCTGGA	TTCATAATTATGGACTATAGTTCTCTGTACGTGTTCTCTGACCATGCCATCTTATGCTGGA
rs6428801	chr1:119400532	AGTGTATTTTACTTTGTTGTCTCTCTTTGCATGGTGTATCTTTTCCACTTGGTATGGTCCT	AGTGTATTTTACTTTGTTGTCTCTCTTTGCGTGGTGTATCTTTTCCACTTGGTATGGTCCT
rs10802076	chr1:119402400	AGAATGCATAAAACATTGTGATTAGTTAAGCATTATTACTTAGGTTCCAAGTAATTCGTAT	AGAATGCATAAAACATTGTGATTAGTTAAGGATTATTACTTAGGTTCCAAGTAATTCGTAT
rs7522743	chr1:119404090	CACTGTACTAAATGCACAGAGCTGAATAGGATACCATCTGTGCTCGTCAAGATCTCCGTTT	CACTGTACTAAATGCACAGAGCTGAATAGGGTACCATCTGTGCTCGTCAAGATCTCCGTTT
rs17658686	chr22:29144631	ATCTTTGATCAGGGCACTAAGGATGCTCCCCACGGCCTTCACAGTGACGGCGGAGACCCTG	ATCTTTGATCAGGGCACTAAGGATGCTCCCGACGGCCTTCACAGTGACGGCGGAGACCCTG
rs16904930	chr8:134559036	CTGTCTTGTTAACTGGTCTTCAGATTACTACGGCTGGAGGGATATAGAGCAAGGGGGGAGT	CTGTCTTGTTAACTGGTCTTCAGATTACTATGGCTGGAGGGATATAGAGCAAGGGGGGAGT
rs13251263	chr8:134561435	CCCTGGCTCCCGGAAATGACATCTGGGCCAAGACGCCACAGACCAAAGATCTCTGCATGTC	CCCTGGCTCCCGGAAATGACATCTGGGCCAGGACGCCACAGACCAAAGATCTCTGCATGTC
rs2142307	chr8:134561733	TCCCTAAGGAGAGTCCCTAATGAAGATAAACTCCTCTGGCAATAGGGAGTTGAGGGGCAAT	TCCCTAAGGAGAGTCCCTAATGAAGATAAATTCCTCTGGCAATAGGGAGTTGAGGGGCAAT
rs10110481	chr8:134563756	AGTAGAAGTCACAGCATCTTTTCTTTGCCTTTCCATGTTCCTGTTCTTGGAGTGGTTGCCT	AGTAGAAGTCACAGCATCTTTTCTTTGCCTCTCCATGTTCCTGTTCTTGGAGTGGTTGCCT
rs909286	chr8:134564124	CCCACCCTGTGCCCATACATGAAGCCAGCCGGCCAGGATCCCAAAGGCCAGGACATGGGAG	CCCACCCTGTGCCCATACATGAAGCCAGCCAGCCAGGATCCCAAAGGCCAGGACATGGGAG
rs2896714	chr8:134564796	TAAACAAACAAACAAACAAAAATGCTCACACGAAGCGTTGCTGTGGGATAAATGGCCTTGC	TAAACAAACAAACAAACAAAAATGCTCACATGAAGCGTTGCTGTGGGATAAATGGCCTTGC
rs10477934	chr5:108152464	TTCATTTCTATTGATACTGTCATGATTATTGATTTCTAAAGCCTTAAAAATTTTATTGAAT	TTCATTTCTATTGATACTGTCATGATTATTTATTTCTAAAGCCTTAAAAATTTTATTGAAT
rs1728148	chr2:10542055	TTCAGAAAGGTAGTCTGGAACCCAGAGAGACAGAGTGATGTCCAAACTTTCATAATGAGCG	TTCAGAAAGGTAGTCTGGAACCCAGAGAGAGAGAGTGATGTCCAAACTTTCATAATGAGCG
rs2357551	chr2:10542778	GTGGTTGTACTCTACTTCACCAAACTTCTTCCAGAAGCATAGAAGAGTGGACTGTGGAGTG	GTGGTTGTACTCTACTTCACCAAACTTCTTTCAGAAGCATAGAAGAGTGGACTGTGGAGTG
rs6432097	chr2:10546176	GTTCCTTGCCCAGGTGTTGGCCCAGCTCTCTTCATGGTTCCAAGAAGGCTGCCCCAGGAAG	GTTCCTTGCCCAGGTGTTGGCCCAGCTCTCCTCATGGTTCCAAGAAGGCTGCCCCAGGAAG
rs17223788	chr15:78476442	TTGCAGGGAGACACAACATTTAGCTCTATGTATGCTGCCATGGAAGAGACAAAGGGATGGA	TTGCAGGGAGACACAACATTTAGCTCTATGCATGCTGCCATGGAAGAGACAAAGGGATGGA
rs3743408	chr15:78477390	TTCACCACGTGGAGGAAGGTGTGTGCAGCGCGAAAGAATGACACCTGAAGGGAAGGAGAGG	TTCACCACGTGGAGGAAGGTGTGTGCAGCGTGAAAGAATGACACCTGAAGGGAAGGAGAGG
rs17315253	chr15:78478091	TCCATGCTCCGAGAGCAGTTTAGAATCTAAAGTGCAATGCTGTCACAGCCCTGTGCGGTAG	TCCATGCTCCGAGAGCAGTTTAGAATCTAAGGTGCAATGCTGTCACAGCCCTGTGCGGTAG
rs12592383	chr15:78478504	ATTTGTCCTTCATTGTTGTTGATCTCATCTGCCAATAACTAGAAAATCTTGGTTAAAGTCT	ATTTGTCCTTCATTGTTGTTGATCTCATCTACCAATAACTAGAAAATCTTGGTTAAAGTCT
rs353694	chr19:4194792	TGTCCCATATTATTGTCTTCCTGGTGCCAGGAAAAGGGGTCCCTAGCTGGGTGTGGTGGCT	TGTCCCATATTATTGTCTTCCTGGTGCCAGAAAAAGGGGTCCCTAGCTGGGTGTGGTGGCT
rs453992	chr19:4195586	ACGTGTAGGTGGGCTGACCGCGTGACAAAACGTAGTACTTTGTCGACTTAAAGAAAGTTAT	ACGTGTAGGTGGGCTGACCGCGTGACAAAATGTAGTACTTTGTCGACTTAAAGAAAGTTAT
rs11671900	chr19:4197693	GTGACTCAAGAGTCGTCCAGGGTCCTCTTAAGTCACCCTATGTGTGGCCCCAACCCCATGT	GTGACTCAAGAGTCGTCCAGGGTCCTCTTACGTCACCCTATGTGTGGCCCCAACCCCATGT
rs2270820	chr5:157090950	TTCTCTTCGCGGCTACTCTAGCCGTAGGGCAGTCATAGTCTCTCTCGCCTCTCCCTGTAGT	TTCTCTTCGCGGCTACTCTAGCCGTAGGGCGGTCATAGTCTCTCTCGCCTCTCCCTGTAGT
rs3760477	chr17:3548198	AGTGAGCATTGGAGTGCTGTGTTAGCAGGGGGCTGAGGAGGAGGCTGGCAGGAGAGCCAAG	AGTGAGCATTGGAGTGCTGTGTTAGCAGGGTGCTGAGGAGGAGGCTGGCAGGAGAGCCAAG
rs2134633	chr17:3548244	ACTCCAATGCTCACTAAAGCAGCCGCCACCGAGTGACATCACCCCTAAGAAGATGCCCGTC	ACTCCAATGCTCACTAAAGCAGCCGCCACCAAGTGACATCACCCCTAAGAAGATGCCCGTC
rs17398198	chr17:3552638	ATAAGCTGTAACACTCACTGCGAAGGTCTGAAGCTTCACTCCTGAAGTCAGCGAGACCATG	ATAAGCTGTAACACTCACTGCGAAGGTCTGCAGCTTCACTCCTGAAGTCAGCGAGACCATG
rs3813739	chr13:112291289	GCTTTGTCTCCATGTTTTTGAGTCAGAACGACAACAAACGTTTTACTTGCCAACAATTCTG	GCTTTGTCTCCATGTTTTTGAGTCAGAACGCCAACAAACGTTTTACTTGCCAACAATTCTG
rs9550158	chr13:112292734	GGTATACAGTCAGGGCTGTCTTCCCAGAATATAATGCAAGGAAACCTTGACCCAGTTCTCC	GGTATACAGTCAGGGCTGTCTTCCCAGAATGTAATGCAAGGAAACCTTGACCCAGTTCTCC
rs7654165	chr4:45967995	CTGCCTAGCCATCTTCTGTCTTAAAACGCCCTCCCAAGAGCCTGCTTCCCACGGAAGCCTC	CTGCCTAGCCATCTTCTGTCTTAAAACGCCTTCCCAAGAGCCTGCTTCCCACGGAAGCCTC
rs17597014	chr4:45973903	GACAAATCATATCTCTCTGAACTTTAAATTCCTCAATTACAAAATGAAGTTAATGATTATT	GACAAATCATATCTCTCTGAACTTTAAATTTCTCAATTACAAAATGAAGTTAATGATTATT
rs17597028	chr4:45974418	TATCTGCTTTAAAATAAATTGTTCATATTTATGCCGAGGCCACCTTTTCCCTCTCAGATAA	TATCTGCTTTAAAATAAATTGTTCATATTTCTGCCGAGGCCACCTTTTCCCTCTCAGATAA
rs17639557	chr4:45974471	TCAGATAAACCAACGTGGCTATTTCAGTGACTACATACCAGGGTATCATTGTTGTGAAAAC	TCAGATAAACCAACGTGGCTATTTCAGTGATTACATACCAGGGTATCATTGTTGTGAAAAC
rs223300	chr6:57203164	GTGGGGCACTTTCTTGGCCTGTCAGGACCACTGGGGATTCCCCTTTCTTTGTTTTGACATA	GTGGGGCACTTTCTTGGCCTGTCAGGACCATTGGGGATTCCCCTTTCTTTGTTTTGACATA
rs4147779	chr11:67561383	GTGGAAGGATTTCACTTCATTTGCAGTGAGGAAACCAGCTCCGAGAGGTGAAAGGGCTTGC	GTGGAAGGATTTCACTTCATTTGCAGTGAGAAAACCAGCTCCGAGAGGTGAAAGGGCTTGC
rs4147782	chr11:67562139	GCCCCGACCCTGTCAGAACAGGCCTATGGCGCCCAACCACAAGTCCCCCAATTTTCTGAGG	GCCCCGACCCTGTCAGAACAGGCCTATGGCACCCAACCACAAGTCCCCCAATTTTCTGAGG
rs884826	chr11:67562705	CCGCCCAAGGGAGGGGTCCCGGAGGTGGGGGAGCATCCTGGGGACCCCAAGCCCATGAGCC	CCGCCCAAGGGAGGGGTCCCGGAGGTGGGGAAGCATCCTGGGGACCCCAAGCCCATGAGCC
rs2301262	chr12:6926121	GCTGGCTCAGCCCCGCCCCCTGCGGCCCTCTGCCGTGGCTTCCCCCTCCCTACAGAGAGAT	GCTGGCTCAGCCCCGCCCCCTGCGGCCCTCCGCCGTGGCTTCCCCCTCCCTACAGAGAGAT
rs7310161	chr12:6927395	AGCGGAGGCAGGGCCACAGCAGGTTAGACCATGTTGGAGCTAGGATGTTGAAAGTGAAAAC	AGCGGAGGCAGGGCCACAGCAGGTTAGACCTTGTTGGAGCTAGGATGTTGAAAGTGAAAAC
rs1295391	chr6:119716796	ATTGTAGAGCACGTGCATGCGCATGTGCTTTACTATGTGACCGTGGCCAAGAAGTCACCTA	ATTGTAGAGCACGTGCATGCGCATGTGCTTGACTATGTGACCGTGGCCAAGAAGTCACCTA
rs8064765	chr17:37931898	CCCAGAGCCCTGTGGTAGGGGGTGGGGAACAGGATGGCTGCATCCACTTGTTCCTGGGGGT	CCCAGAGCCCTGTGGTAGGGGGTGGGGAACGGGATGGCTGCATCCACTTGTTCCTGGGGGT
rs647397	chr17:37932924	TTTCAGATCAAAGTGGCCTGCCTCTTCAACGTCTCAGCCTACCCAAGGCATGTCCTAGGTG	TTTCAGATCAAAGTGGCCTGCCTCTTCAACATCTCAGCCTACCCAAGGCATGTCCTAGGTG
rs743591	chr17:37932965	CCCAAGGCATGTCCTAGGTGTAGGCTGCTCTCTGGTGGCCAGATAGGGAAGGACTCATTCA	CCCAAGGCATGTCCTAGGTGTAGGCTGCTCCCTGGTGGCCAGATAGGGAAGGACTCATTCA
rs610759	chr17:37937641	AGCGGCGGCAGCAGGAAATGCAGCGGCGGCCGCAGCAGCAGCAAAACGGATCGGTGGAGAG	AGCGGCGGCAGCAGGAAATGCAGCGGCGGCAGCAGCAGCAGCAAAACGGATCGGTGGAGAG
rs10276226	chr7:12375451	GAGACGGGGTTTCACCGTGTTGGCCAGGATAATCTCGATCTCCTGACCCCGTGATCTGCCC	GAGACGGGGTTTCACCGTGTTGGCCAGGATGATCTCGATCTCCTGACCCCGTGATCTGCCC
rs6965970	chr7:12376796	CCATTAGCCTCAATTTTATTATATTTTAGACGATATGATCTCCATTTATACAAATATAATT	CCATTAGCCTCAATTTTATTATATTTTAGATGATATGATCTCCATTTATACAAATATAATT
rs6460963	chr7:12377125	GCAATAAAACCTTCACTTTAGTACTGAACCTTGGACTATGATAGTTCATGGCTCAGTATTA	GCAATAAAACCTTCACTTTAGTACTGAACCCTGGACTATGATAGTTCATGGCTCAGTATTA
rs1859989	chr7:12380087	CTATGCCAAAGCTTCTTTTTATTTCTTCAACAAAGAAATGATCACTGAAATTGAAACTGAA	CTATGCCAAAGCTTCTTTTTATTTCTTCAAGAAAGAAATGATCACTGAAATTGAAACTGAA
rs1859990	chr7:12380092	CCAAAGCTTCTTTTTATTTCTTCAACAAAGAAATGATCACTGAAATTGAAACTGAAATTGA	CCAAAGCTTCTTTTTATTTCTTCAACAAAGGAATGATCACTGAAATTGAAACTGAAATTGA
rs3735222	chr7:12382919	CATTTCATTGGGCAATCTCTGCATTCCTGACGACCAAAGTTTCTGTCTCGATCTTCCAGTT	CATTTCATTGGGCAATCTCTGCATTCCTGATGACCAAAGTTTCTGTCTCGATCTTCCAGTT
rs2240571	chr7:12383228	CTGCCAGGCACAACTGAGATCCAGAAATAAGAGGATTAGCGAGAGAAGGGGAAATATGCAG	CTGCCAGGCACAACTGAGATCCAGAAATAACAGGATTAGCGAGAGAAGGGGAAATATGCAG
rs4766517	chr12:109822432	TGCAAGGTGTCATTATATAATACTTTTACTGAAGACAGCTTTCCTGCTGGGTGCAGTGGCT	TGCAAGGTGTCATTATATAATACTTTTACTCAAGACAGCTTTCCTGCTGGGTGCAGTGGCT
rs12828640	chr12:109824018	AAATGTTTCCCTAGCTAATAGGCACACCATAGATTTTCGTTAAAACCCTGTGTGAGCAGTC	AAATGTTTCCCTAGCTAATAGGCACACCATGGATTTTCGTTAAAACCCTGTGTGAGCAGTC
rs7957842	chr12:109826248	GCTTTAAGACCTGATTTTTAAACTAAAAATTAAGTGAATGAATTTCAGGAAAGGTTAGTTT	GCTTTAAGACCTGATTTTTAAACTAAAAATGAAGTGAATGAATTTCAGGAAAGGTTAGTTT
rs756823	chr12:109827570	AGGATTTGGTTGTCATGATAGAAAGGGGACATTTTAGTCGATATCTTCCATAACACATTCA	AGGATTTGGTTGTCATGATAGAAAGGGGACGTTTTAGTCGATATCTTCCATAACACATTCA
rs876311	chr12:109829586	AAACTGAGGCACGGGGAGCTGATGCTGCTTGTCCCAGTGGTGCTGTGTACACAGGGGGTGC	AAACTGAGGCACGGGGAGCTGATGCTGCTTCTCCCAGTGGTGCTGTGTACACAGGGGGTGC
rs592389	chr17:37960970	CACCTAACTCCTCCTGCAGATGCCCCTTGGTTATCCAGAGACTGTGTCTGGCCTTTAATAT	CACCTAACTCCTCCTGCAGATGCCCCTTGGGTATCCAGAGACTGTGTCTGGCCTTTAATAT
rs12602084	chr17:37965295	CTGATCTCATCTCCCACCAATCTCCATCTACATCACCCAGTTCAGCCCTCCTGCCTCAGGG	CTGATCTCATCTCCCACCAATCTCCATCTATATCACCCAGTTCAGCCCTCCTGCCTCAGGG
rs608061	chr17:37965334	GTTCAGCCCTCCTGCCTCAGGGCCTTTGTACTTGGCCCCCTCTGGGTCACATTCCCTGATC	GTTCAGCCCTCCTGCCTCAGGGCCTTTGTATTTGGCCCCCTCTGGGTCACATTCCCTGATC
rs629861	chr17:37967540	CTGATCCCGAAGGCTCTGGGAGTGGGTGAAGCCTTGATGCCGATCGGACCCCCGCTGGGAC	CTGATCCCGAAGGCTCTGGGAGTGGGTGAATCCTTGATGCCGATCGGACCCCCGCTGGGAC
rs17526008	chr17:37967540	GTCCCAGCGGGGGTCCGATCGGCATCAAGGCTTCACCCACTCCCAGAGCCTTCGGGATCAG	GTCCCAGCGGGGGTCCGATCGGCATCAAGGATTCACCCACTCCCAGAGCCTTCGGGATCAG
rs4912527	chr3:185352575	TCAGAGGAAACAAAAAAGTTGTAAAGGAAACGATTATAAAACACACATGAGGCCAGCGCGG	TCAGAGGAAACAAAAAAGTTGTAAAGGAAATGATTATAAAACACACATGAGGCCAGCGCGG
rs2277675	chr17:3447259	CAGCCCTGGCATGGCTGGAGGAGGGGCAGCAGCTAAGTGGTTTCTGAAAAAGGGCAAAAAT	CAGCCCTGGCATGGCTGGAGGAGGGGCAGCGGCTAAGTGGTTTCTGAAAAAGGGCAAAAAT
rs733080	chr17:3447360	TCTCAGGAAAGGAGGGCGCTGCTCGGCCTCTCAAACCTGTGGCTCCTGCCCCCGGAGGTCT	TCTCAGGAAAGGAGGGCGCTGCTCGGCCTCCCAAACCTGTGGCTCCTGCCCCCGGAGGTCT
rs161380	chr17:3451075	GCAGGTGAAGCCCACAAGCCCCCTCCCCCCAGCATAACCCACAATGGGCTCCTGTTCCCTC	GCAGGTGAAGCCCACAAGCCCCCTCCCCCCGGCATAACCCACAATGGGCTCCTGTTCCCTC
rs161377	chr17:3451725	AGGCAGGAGGATCCTTTGAGTCCAGGAGGTGGAGGCTGCAGTGAGCTATGATTGTGAGTCC	AGGCAGGAGGATCCTTTGAGTCCAGGAGGTTGAGGCTGCAGTGAGCTATGATTGTGAGTCC
rs161376	chr17:3451799	CTGTTGCTACCAAAAAAAAAAAAAAATCCGAGCGTGGTGGTGCACACCTGTAGTCCCAGTT	CTGTTGCTACCAAAAAAAAAAAAAAATCCGGGCGTGGTGGTGCACACCTGTAGTCCCAGTT
rs161374	chr17:3452683	CATCTGCCATTCCAGATTTGGCCCAGCCGCTGGCTGGCGCGTCCGCAGACGCTTTCCTGAG	CATCTGCCATTCCAGATTTGGCCCAGCCGCCGGCTGGCGCGTCCGCAGACGCTTTCCTGAG
rs222741	chr17:3455629	ATCCATGGTTACTAACGACAGTTAACATTTCTTTTTGAGTACCTGCTGTGTACTGGGATCT	ATCCATGGTTACTAACGACAGTTAACATTTTTTTTTGAGTACCTGCTGTGTACTGGGATCT
rs12700796	chr7:27050515	CGGCAGAGCAGTTCTCCTACCCTACATTCCTGAGGGTGGCTCTCCCAACCCCCTCCATGAG	CGGCAGAGCAGTTCTCCTACCCTACATTCCCGAGGGTGGCTCTCCCAACCCCCTCCATGAG
rs17449406	chr7:27050515	CGGCAGAGCAGTTCTCCTACCCTACATTCCTGAGGGTGGCTCTCCCAACCCCCTCCATGAG	CGGCAGAGCAGTTCTCCTACCCTACATTCCCGAGGGTGGCTCTCCCAACCCCCTCCATGAG
rs6461998	chr7:27054397	CCTGCCCCCACCTCCAGCCCTTCATCAGAGTCCCTACTTACTTGCTGTTTTAGGGCATTTT	CCTGCCCCCACCTCCAGCCCTTCATCAGAGCCCCTACTTACTTGCTGTTTTAGGGCATTTT
rs6461999	chr7:27054544	CTTATGAGTCAAACCTCTATGAACCCCAACCTTTTTGTACTCGGGGAGGCTGAACCCCTGC	CTTATGAGTCAAACCTCTATGAACCCCAACATTTTTGTACTCGGGGAGGCTGAACCCCTGC
rs886139	chr19:40337309	GAGGCGTCCACTCACCCTAGACCTGCCTGCCCCATCCCCGTTCCCACCCTCTCCCACCACT	GAGGCGTCCACTCACCCTAGACCTGCCTGCGCCATCCCCGTTCCCACCCTCTCCCACCACT
rs6443954	chr3:185385503	CGTGGCCAGTTCCTTAATATCACATCCAGTTTGTGTTCACTTAACCAGGTGTCTTATCAAA	CGTGGCCAGTTCCTTAATATCACATCCAGTCTGTGTTCACTTAACCAGGTGTCTTATCAAA
rs7517289	chr1:157914963	AGAAACGTCTTAACTCCAATTCTGACCTTTACCCACCTCCTCGCAACACCCCTCATCAGAG	AGAAACGTCTTAACTCCAATTCTGACCTTTCCCCACCTCCTCGCAACACCCCTCATCAGAG
rs10797093	chr1:157916518	TACCAGTTTCTTTCTCGTTTAGGGGGGAGATAATGAGTTTTAGGTGCCCCTGGGATATTAG	TACCAGTTTCTTTCTCGTTTAGGGGGGAGAGAATGAGTTTTAGGTGCCCCTGGGATATTAG
rs11265558	chr1:157920254	AGATGTAATCCACATAAGCCCGCAAAAAAGACAGACACAGGCACTACTTCTTAAAGGAGAA	AGATGTAATCCACATAAGCCCGCAAAAAAGGCAGACACAGGCACTACTTCTTAAAGGAGAA
rs9854599	chr3:185753944	AACTGACCCACATTTCTGTGGTCCTTCTTCAGCTTCCTTCATCAGGCCCACTGGGTTAGGA	AACTGACCCACATTTCTGTGGTCCTTCTTCGGCTTCCTTCATCAGGCCCACTGGGTTAGGA
rs11705934	chr3:185757579	ACCTCCTTGGAATGGGCAGCTCGGAAGTGGGAAAGAGGGCCAGGAATCCATAGGGCATCAT	ACCTCCTTGGAATGGGCAGCTCGGAAGTGGAAAAGAGGGCCAGGAATCCATAGGGCATCAT
rs9860004	chr3:185327014	AGTAGCCACTAGCCACACATGGTTATTAGGTGCTTGAAATGTGGCAAATGTGACTGTATCA	AGTAGCCACTAGCCACACATGGTTATTAGGCGCTTGAAATGTGGCAAATGTGACTGTATCA
rs2256102	chr3:185334732	CGCCACAGGCTTCTGCAGTTCCTGCAAACTGTTCCCATCCCGCCCCGCGTTGCACGTCGGG	CGCCACAGGCTTCTGCAGTTCCTGCAAACTCTTCCCATCCCGCCCCGCGTTGCACGTCGGG
rs3761550	chrX:48585334	GCTCCAAATGACGCTATCAAGTTGGGATAAGTCTCTCCATCTGACAACTGAGGAAACAATG	GCTCCAAATGACGCTATCAAGTTGGGATAAATCTCTCCATCTGACAACTGAGGAAACAATG
rs7520271	chr1:39713806	ACGTACTAAATGTTCAGTAACTGGCCAGGCAGGTGGCTCACACCTATACTCTCAGTGCTTT	ACGTACTAAATGTTCAGTAACTGGCCAGGCCGGTGGCTCACACCTATACTCTCAGTGCTTT
rs4660846	chr1:39718604	TGGGGACAGAACTGTGAGCTAAACGTTCACCGAACAACCTCTTCTTGGAGAGAGTGAGAGA	TGGGGACAGAACTGTGAGCTAAACGTTCACTGAACAACCTCTTCTTGGAGAGAGTGAGAGA
rs7539261	chr1:39719596	CTGTGGAGATCAGGGGTATGAACGAGGAGAATCATAACTGCTATTCTCCTGTTCAAGTCCC	CTGTGGAGATCAGGGGTATGAACGAGGAGATTCATAACTGCTATTCTCCTGTTCAAGTCCC
rs7539279	chr1:39719661	CTGAACACTGGCTACAAAGATGAGTAAGACATTATTCCTTTCCTGGAATTGGTCACAGTCT	CTGAACACTGGCTACAAAGATGAGTAAGACGTTATTCCTTTCCTGGAATTGGTCACAGTCT
rs2243761	chr1:39720709	CTTTCCCAGAAGTAATTGACCCAATACTATTATTTGGAAATAATGACAGAAACAGACAATA	CTTTCCCAGAAGTAATTGACCCAATACTATCATTTGGAAATAATGACAGAAACAGACAATA
rs7729926	chr5:137542540	CGACAGTTGGTAACCCGGACCCACATTAGAACTCAGAGGTCAAGCAGAAGCGAACGACTGG	CGACAGTTGGTAACCCGGACCCACATTAGATCTCAGAGGTCAAGCAGAAGCGAACGACTGG
rs17171770	chr5:137542714	CCTAGTCGCCGAAGCTGGACTTTCGCAGCCGCAGAGCACAACTCCGCCCACGAGGTGCAGC	CCTAGTCGCCGAAGCTGGACTTTCGCAGCCACAGAGCACAACTCCGCCCACGAGGTGCAGC
rs17171772	chr5:137542752	GTGCCACTTGCTCCTCCTGGGATACTGGCTTACTCACACCTAGTCGCCGAAGCTGGACTTT	GTGCCACTTGCTCCTCCTGGGATACTGGCTCACTCACACCTAGTCGCCGAAGCTGGACTTT
rs1799257	chr19:53664351	ATCCTTTGGTGGCGAGGGCGGGGAGGACGAAAGCGCCCACTGTGGATTGGACAGTGTCAAA	ATCCTTTGGTGGCGAGGGCGGGGAGGACGACAGCGCCCACTGTGGATTGGACAGTGTCAAA
rs3816596	chr5:160907910	GAGCCACGGGCGGCGTGAGGTGCTACGAGTCTGGGGACACAAGGCCGTCCGAAGGAACCGG	GAGCCACGGGCGGCGTGAGGTGCTACGAGTTTGGGGACACAAGGCCGTCCGAAGGAACCGG
rs9313889	chr5:160914284	CTAAAGCTCAGCACCAAGGGCTGGGCTGGGGCCAGTGCAAAATCTCCATGCTCCATCTTGA	CTAAAGCTCAGCACCAAGGGCTGGGCTGGGTCCAGTGCAAAATCTCCATGCTCCATCTTGA
rs1002067	chr5:160916821	GCTTTGTATTATGTGTCAAGGGTTCTCCACGACTTAAAGAACTTGGGCATATGATGGTTTT	GCTTTGTATTATGTGTCAAGGGTTCTCCACAACTTAAAGAACTTGGGCATATGATGGTTTT
rs13337052	chr16:7313471	TAATTTTCTAAAAACCCAGGCCACCATTTCTCAGAGTATATTAATCCATATCGCATTCAAA	TAATTTTCTAAAAACCCAGGCCACCATTTCCCAGAGTATATTAATCCATATCGCATTCAAA
rs4786999	chr16:7314686	GCTTAATGAACCAAGAGGAGCATGGTGCTGCCTGAACCACTGGGGATTTGAGTTTGTAATG	GCTTAATGAACCAAGAGGAGCATGGTGCTGGCTGAACCACTGGGGATTTGAGTTTGTAATG
rs4605180	chr16:7317096	CTGAACCAAACACAATGCTGAAATGACTTTCGGACAAAGGTGATGGTGCACTTAGTTCTGT	CTGAACCAAACACAATGCTGAAATGACTTTTGGACAAAGGTGATGGTGCACTTAGTTCTGT
rs17671597	chr16:7321107	AATTCAGCCTTAAATAATTGAATTCTCTGCCAAACCCTGTCCGCCGTCGTTATCTAGAAAT	AATTCAGCCTTAAATAATTGAATTCTCTGCGAAACCCTGTCCGCCGTCGTTATCTAGAAAT
rs7190299	chr16:7322359	TCTCTCTGCGTAGCACACATTGTGCAAATACAAGCTGGCTGGTAGTTTTATCTTATTTACA	TCTCTCTGCGTAGCACACATTGTGCAAATATAAGCTGGCTGGTAGTTTTATCTTATTTACA
rs9301143	chr13:105989083	GACAAATAGATAATCGCAGCTTTAAAAAAGTGCAATTCCCCACCTCCAACAAAAAAAATGC	GACAAATAGATAATCGCAGCTTTAAAAAAGCGCAATTCCCCACCTCCAACAAAAAAAATGC
rs2546890	chr5:158692478	GCCTGGAACAGGGCTCTGAATTGTCTTCCCACAGTGAAATCACTTGTCTATTGCTGAGCCA	GCCTGGAACAGGGCTCTGAATTGTCTTCCCGCAGTGAAATCACTTGTCTATTGCTGAGCCA
rs7709212	chr5:158696755	TGGGATGGATGCATTTCACCAGGTCACTGCTGAAATGTTGTACTTTTATGGATGGTGATGA	TGGGATGGATGCATTTCACCAGGTCACTGCCGAAATGTTGTACTTTTATGGATGGTGATGA
rs1433043	chr5:158696882	TTTTCAGTGGCCTTTCTAATGCATGTTTTGTTTTGTTTTAATGCTTTGCAAAAGATTCCTA	TTTTCAGTGGCCTTTCTAATGCATGTTTTGCTTTGTTTTAATGCTTTGCAAAAGATTCCTA
rs1694380	chr1:147105414	TTATTTTGTTTTGGTGCTTCTAACAGTCTGTGTTCAATTCCCTATGGAGAAATGTGTTTCT	TTATTTTGTTTTGGTGCTTCTAACAGTCTGCGTTCAATTCCCTATGGAGAAATGTGTTTCT
rs1694379	chr1:147105490	ATGTCTCACAAAATATTCACTCAAAAAGTCGGTTGAATGGGTTAATGAGTTTCAACATTGC	ATGTCTCACAAAATATTCACTCAAAAAGTCTGTTGAATGGGTTAATGAGTTTCAACATTGC
rs2191090	chr17:23852624	GCCCCAATGTGATGGAGGAGGGGGACCCCTTCCTGAACCCTGCATCTGGATTGGCCATCTT	GCCCCAATGTGATGGAGGAGGGGGACCCCTCCCTGAACCCTGCATCTGGATTGGCCATCTT
rs7406210	chr17:23854361	TGGAAGCCTTATTGAACATTTTGAAAACTGGCAGGGAAAGTTACCTCTGTTAGTCTTCTTT	TGGAAGCCTTATTGAACATTTTGAAAACTGACAGGGAAAGTTACCTCTGTTAGTCTTCTTT
rs758436	chr17:23857222	GCGCACAGCCTGTGGCTTGTAGAGGAGGGGGTTGTCCCGTGGCCCCCGCCTGCACTCCAGA	GCGCACAGCCTGTGGCTTGTAGAGGAGGGGATTGTCCCGTGGCCCCCGCCTGCACTCCAGA
rs168109	chr19:46408111	TAAGATGGTAAAGCCTCAGTCAAGGTGTGACCAGCTAGGAGGTGGCAAAGTTAGGATCTGA	TAAGATGGTAAAGCCTCAGTCAAGGTGTGATCAGCTAGGAGGTGGCAAAGTTAGGATCTGA
rs8073426	chr17:60993743	ACAGTTAAACAGTAATTTAAAACTTCCTAATTGGACTGACTTTCAAGTGCTTTTATTATGG	ACAGTTAAACAGTAATTTAAAACTTCCTAACTGGACTGACTTTCAAGTGCTTTTATTATGG
rs1017020	chr17:60994368	AGGGCGAGGTTGGGGGAGAAAACAGCCCCGAAAGGTCATTTTTAGAAAAGGAACTGGAAAA	AGGGCGAGGTTGGGGGAGAAAACAGCCCCGCAAGGTCATTTTTAGAAAAGGAACTGGAAAA
rs16962508	chr17:60995137	CACCCATGTCATTCTCCTGCTTCAGATCCTCCCCGGCTGCACATAACCTTCAGGATAAGGC	CACCCATGTCATTCTCCTGCTTCAGATCCTGCCCGGCTGCACATAACCTTCAGGATAAGGC
rs1548581	chr17:60995973	GCCAGAGTCAAGCCAGTAGTCGCTGTGTCACGAGGAGCTGTGGTTGGCATCCTCTAAGTTG	GCCAGAGTCAAGCCAGTAGTCGCTGTGTCATGAGGAGCTGTGGTTGGCATCCTCTAAGTTG
rs2456477	chr11:32060147	ATTCCCATTCCGCCTACAATTTATCAGTCTGTTGTGAACATTTCAAGTCAATATACATCTG	ATTCCCATTCCGCCTACAATTTATCAGTCTATTGTGAACATTTCAAGTCAATATACATCTG
rs581573	chr11:32065750	TGGAAAGTACTGTATGTAGCATCCTCTGAAGCACATGATTAGGGTTCTGTGGGCGAGGAAG	TGGAAAGTACTGTATGTAGCATCCTCTGAAACACATGATTAGGGTTCTGTGGGCGAGGAAG
rs1924549	chr1:147021913	AAGAGGGAGAAAGCATCCTTCCGTGCCCAACTTGCGATACTGAGAATTCACCACACGGCAC	AAGAGGGAGAAAGCATCCTTCCGTGCCCAAGTTGCGATACTGAGAATTCACCACACGGCAC
rs3757598	chr7:75090028	GACGCAGACACCCAGCTGGCCACCAAGTGACGAGTACCACTGTGCTCCCACTATGCCACTG	GACGCAGACACCCAGCTGGCCACCAAGTGATGAGTACCACTGTGCTCCCACTATGCCACTG
rs4279521	chr7:75097235	CACTGCTTCCTGGGATATCCTGCTTCCTCGATACCAAACACACACACACAAAGTCCCAGAA	CACTGCTTCCTGGGATATCCTGCTTCCTCGCTACCAAACACACACACACAAAGTCCCAGAA
rs1800469	chr19:46552136	ACAGGTGTCTGCCTCCTGACCCTTCCATCCTTCAGGTGTCCTGTTGCCCCCTCCTCCCACT	ACAGGTGTCTGCCTCCTGACCCTTCCATCCCTCAGGTGTCCTGTTGCCCCCTCCTCCCACT
rs17047566	chr1:214846160	ATTATCCATCTGAGTCATTAACTTTGTCAATAGTTATATTCTGTCACTCATTCATTGATTC	ATTATCCATCTGAGTCATTAACTTTGTCAACAGTTATATTCTGTCACTCATTCATTGATTC
rs3753592	chr1:214846453	GCCTGGAGGGTTTCTGGCGCCCGACTGCGCAGTGCAGACCGAGGGTGCGAATACCTTGCTA	GCCTGGAGGGTTTCTGGCGCCCGACTGCGCGGTGCAGACCGAGGGTGCGAATACCTTGCTA
rs2788193	chr1:214846622	GGGGGGATGATACGATCGTATTCTAATTATCGGCCCCCAGTGGATCTGTCCCGCGTCCTAG	GGGGGGATGATACGATCGTATTCTAATTATTGGCCCCCAGTGGATCTGTCCCGCGTCCTAG
rs6829197	chr4:960851	GGATCCTAGACTTCTTCACTCTGAGCGTGTGCATGAGTAACTGCGGAAGCACGGTGGGTAT	GGATCCTAGACTTCTTCACTCTGAGCGTGTCCATGAGTAACTGCGGAAGCACGGTGGGTAT
rs6580799	chr12:49854772	TAGGATCAAAGTCTTAGCTCATTCTGGAGACATTCAGTATCTCTTTAAGCCATCTTTTCTT	TAGGATCAAAGTCTTAGCTCATTCTGGAGATATTCAGTATCTCTTTAAGCCATCTTTTCTT
rs6580800	chr12:49854841	CCAGTTCTATCTCAAAATGTGTGACTGTGGATAAAGGAATGGGTCCTGGGCTCATAGACAA	CCAGTTCTATCTCAAAATGTGTGACTGTGGGTAAAGGAATGGGTCCTGGGCTCATAGACAA
rs6580801	chr12:49855730	TGTGAGTATTAAATAAGGTACCAAAATGCCGCAAAAATAGTAATGATTCAATAAATGTTAT	TGTGAGTATTAAATAAGGTACCAAAATGCCACAAAAATAGTAATGATTCAATAAATGTTAT
rs6580802	chr12:49855805	TGGTAGTACACTTCTGCTTCTCTGTTAAGATTGGGTTGATTTTGTTATCCTATTTTAATAA	TGGTAGTACACTTCTGCTTCTCTGTTAAGACTGGGTTGATTTTGTTATCCTATTTTAATAA
rs7136657	chr12:49856042	ACAGGTGCACACCACTATGCCCTTTGAGACTGAGTCGCGCTGTGTTGCCAGGCTGTAGTCA	ACAGGTGCACACCACTATGCCCTTTGAGACGGAGTCGCGCTGTGTTGCCAGGCTGTAGTCA
rs6580803	chr12:49862362	ATCAAATTTTTGTACCCATAAATTAATCCCACAATAAAAATCCTGGCTTCTATTACACATA	ATCAAATTTTTGTACCCATAAATTAATCCCGCAATAAAAATCCTGGCTTCTATTACACATA
rs1693531	chr15:50639902	CATCTATGAGCTGCAAATGTCATTTATATTTAGAATGAATTTATAACATGTCTTAGAAAAA	CATCTATGAGCTGCAAATGTCATTTATATTCAGAATGAATTTATAACATGTCTTAGAAAAA
rs1636249	chr7:2657524	GAGTGGACATCAGACGTGCCCAACGGGCTTTGGATTGGGTGTTCGGGGGACGGGGCGTGAC	GAGTGGACATCAGACGTGCCCAACGGGCTTGGGATTGGGTGTTCGGGGGACGGGGCGTGAC
rs2644281	chr7:2659989	AGGGAATTTTGAATCACTAAAGAGTGGACTAGAATTCAGAACAGGTTTTTGGCTCATCCAG	AGGGAATTTTGAATCACTAAAGAGTGGACTGGAATTCAGAACAGGTTTTTGGCTCATCCAG
rs11973498	chr7:2660114	TTCAGCAAGTGCTCCAGACAGCACTCACAACTAACTTTAAATCCTTATAAATAAGCCAGGT	TTCAGCAAGTGCTCCAGACAGCACTCACAAATAACTTTAAATCCTTATAAATAAGCCAGGT
rs3823884	chr7:75189106	GGCTGCTCTCTGCGGGCACCTGGGCAGGGCTCAGGCCCACACCACTGAGGCGCTACCACCG	GGCTGCTCTCTGCGGGCACCTGGGCAGGGCGCAGGCCCACACCACTGAGGCGCTACCACCG
rs10511134	chr3:87408911	AAACATGAGAAAATATGTTGTCAATTAATGATTCATACTCAAAAATGCACAGCTTTTAAAA	AAACATGAGAAAATATGTTGTCAATTAATGTTTCATACTCAAAAATGCACAGCTTTTAAAA
rs2642353	chr3:87410591	TACCTGCTTTTTTTTTTTTTTTTTGTCTCAAACTTTTTTCCTTCTCTATAGAACAGCCTAG	TACCTGCTTTTTTTTTTTTTTTTTGTCTCACACTTTTTTCCTTCTCTATAGAACAGCCTAG
rs2633673	chr3:87410666	CATGTTCACCTCAAAAATCTCTAGATCATGCCTTAAACTTTCAAGGAGGCAAACAGACTAT	CATGTTCACCTCAAAAATCTCTAGATCATGTCTTAAACTTTCAAGGAGGCAAACAGACTAT
rs2633674	chr3:87411055	AGAAATACTCTTATTGGCTATAACTTTTTGGTAAGTTCCAGAAGTATAAAGATGGTTCCCA	AGAAATACTCTTATTGGCTATAACTTTTTGATAAGTTCCAGAAGTATAAAGATGGTTCCCA
rs300995	chr3:87415359	TAAATCATTGTTATTCTGAATCACTAAGGAGAGTAGATGTGGCTGAATCTTACTTGATTTA	TAAATCATTGTTATTCTGAATCACTAAGGAAAGTAGATGTGGCTGAATCTTACTTGATTTA
rs300996	chr3:87415402	TGAATCTTACTTGATTTATGATTCAAGCAGGAAAAAAATGAGTGGTTTGATGGATGTGAGA	TGAATCTTACTTGATTTATGATTCAAGCAGTAAAAAAATGAGTGGTTTGATGGATGTGAGA
rs300998	chr3:87417321	CAGATACTATAAGTAATAATTTAAGAATACAAAACCAAAATACTTTATGATATTTTCCTTT	CAGATACTATAAGTAATAATTTAAGAATACGAAACCAAAATACTTTATGATATTTTCCTTT
rs7233932	chr18:802713	GCCGCGGAGATTGAATGGAGCGCTCCGATTCTGCCCCTCTGCCTTTCTCTGTTCCTTGGCC	GCCGCGGAGATTGAATGGAGCGCTCCGATTGTGCCCCTCTGCCTTTCTCTGTTCCTTGGCC
rs7230070	chr18:804990	GAAAAAGGAAGGTATTTCTCCTTGAGTGTTGGGCCTATTGTGCCAAGCTCAGTGGAGAAAT	GAAAAAGGAAGGTATTTCTCCTTGAGTGTTAGGCCTATTGTGCCAAGCTCAGTGGAGAAAT
rs9958182	chr18:806858	CAATTTCCTCCTGAGTCTATATTTGCAATTTCTGTAGTCATTAGCAAGTGTTTGGCCCATA	CAATTTCCTCCTGAGTCTATATTTGCAATTCCTGTAGTCATTAGCAAGTGTTTGGCCCATA
rs4121512	chr18:807415	CACGCCTCTAATCCCAGCACTTTGGGAGGCTGAGTCAGGTGGATCACTTGAGGTCAGGAGT	CACGCCTCTAATCCCAGCACTTTGGGAGGCCGAGTCAGGTGGATCACTTGAGGTCAGGAGT
rs7237153	chr18:810843	GGACATATTGTCCAGTCGTGGATTCTATTTAAAAACTTTGAAACAGAAAATAATCCTCCGT	GGACATATTGTCCAGTCGTGGATTCTATTTGAAAACTTTGAAACAGAAAATAATCCTCCGT
rs4417611	chr18:811035	AGATTCTTGAGGATACATGGTAAACACTTAAGAACGGGTTCTACATACTCTAAACAGACTC	AGATTCTTGAGGATACATGGTAAACACTTAGGAACGGGTTCTACATACTCTAAACAGACTC
rs7238526	chr18:811516	CCTTTTATAGCTATGTAATCTTAAGCAAGCGAATTTCCCAATTTCTCAAAGACTTCAGTTT	CCTTTTATAGCTATGTAATCTTAAGCAAGCAAATTTCCCAATTTCTCAAAGACTTCAGTTT
rs1559195	chr19:39586660	GTTAAAGTTTTTAATTTTTAGAGAAACACACCAAAATGCTTATAGATGAAATACCTCCGAT	GTTAAAGTTTTTAATTTTTAGAGAAACACATCAAAATGCTTATAGATGAAATACCTCCGAT
rs904115	chr3:87357127	CCTTGTTCAGCTTTTGAAGAAAGATAGCATAACATTGGAGAGTGCTGATTCTGGACACAGA	CCTTGTTCAGCTTTTGAAGAAAGATAGCATCACATTGGAGAGTGCTGATTCTGGACACAGA
rs4681158	chr3:150021982	GGAACCACAGTGTATGGATTGAGATAAACTTTCCAGTGTGTTTACAGTTCCAATTACAGCA	GGAACCACAGTGTATGGATTGAGATAAACTCTCCAGTGTGTTTACAGTTCCAATTACAGCA
rs16860985	chr3:150022447	AGGCACATGTCTCAAGTTGGTCCACTGAGAATCAATCTAAATATTTGGTTTAGAATTTGGG	AGGCACATGTCTCAAGTTGGTCCACTGAGATTCAATCTAAATATTTGGTTTAGAATTTGGG
rs9849625	chr3:150022852	ATCTTTTCAATAGGGTTACCAATCCACTAGGATGCAAAACTGTACTTATTAGTGGCCATCC	ATCTTTTCAATAGGGTTACCAATCCACTAGAATGCAAAACTGTACTTATTAGTGGCCATCC
rs7539800	chr1:45974149	TTCTGCTCTGTCAGTTCATCTAGGAACTTTCTTTACTGTTGCATTGTCATCCCTAGGATGT	TTCTGCTCTGTCAGTTCATCTAGGAACTTTGTTTACTGTTGCATTGTCATCCCTAGGATGT
rs4390216	chr1:45978476	CAGCTTGCTTTGTCAAGGCCATTAGGAGTGCAAGAGTGAGTCTTCTAGCAAGATAGAGTCT	CAGCTTGCTTTGTCAAGGCCATTAGGAGTGTAAGAGTGAGTCTTCTAGCAAGATAGAGTCT
rs7249143	chr19:12853579	TCCAGCCCTACAACCTGGGTCCAACTCTTGGGACCTTTGTTCTTCCTCTTTTTTTTTTTTT	TCCAGCCCTACAACCTGGGTCCAACTCTTGTGACCTTTGTTCTTCCTCTTTTTTTTTTTTT
rs10494162	chr1:114185125	GATGTTCTGTAGTCGTTAGGCTTGTAATTCGTAATGACGGTGGAGACTACGTGAGACCAGC	GATGTTCTGTAGTCGTTAGGCTTGTAATTCATAATGACGGTGGAGACTACGTGAGACCAGC
rs7519860	chr1:114194562	TGTTCTTACATCCTTTCCTCATATTTTTCTGCTAACTTTCCTCGGTTCTTCAGAATATACT	TGTTCTTACATCCTTTCCTCATATTTTTCTACTAACTTTCCTCGGTTCTTCAGAATATACT
rs366696	chr11:2880343	GGTGGGGTAGGGCGGGGAGACCCCTGAGGGTCCGGGAGCTGCGCCTGGCGCCCTCCCCCAT	GGTGGGGTAGGGCGGGGAGACCCCTGAGGGCCCGGGAGCTGCGCCTGGCGCCCTCCCCCAT
rs12714241	chr2:28881064	TAAACTCTGTTATAATTGGTGGCTAGAGTCTATATTGCCATGGACACTCTTCTATAGTTAC	TAAACTCTGTTATAATTGGTGGCTAGAGTCCATATTGCCATGGACACTCTTCTATAGTTAC
rs7607844	chr2:28883389	ACTGTGTTCCGAAATGCCTTCTCTAAGGACTATCCATAGAGACAGCTCTCTGGTCTCAATT	ACTGTGTTCCGAAATGCCTTCTCTAAGGACAATCCATAGAGACAGCTCTCTGGTCTCAATT
rs4549034	chr2:28884230	TCCCTTGTCTTTAAACATGTCTGCGTATACCTGAACTCTAATTGTGGACAGGGTTCAAAGT	TCCCTTGTCTTTAAACATGTCTGCGTATACTTGAACTCTAATTGTGGACAGGGTTCAAAGT
rs4372836	chr2:28885534	GGGCACAAAGATAAGTTAATGTGTTTTTATTCCCTAGGAGCTGAGTCGAGAGTAGGAGAAA	GGGCACAAAGATAAGTTAATGTGTTTTTATCCCCTAGGAGCTGAGTCGAGAGTAGGAGAAA
rs966250	chr2:28885790	TTCAACCAGAATCCCTGCAGAACTAATTTTGTAGAACCGCCGGGGATAAAGACCTTTATTT	TTCAACCAGAATCCCTGCAGAACTAATTTTTTAGAACCGCCGGGGATAAAGACCTTTATTT
rs7598876	chr2:28886117	CGGGGAACCTCCCTGGCGCCTGCGCCACCGTGGCGAGACTCGGCGCCGTGGACGTGGAGAG	CGGGGAACCTCCCTGGCGCCTGCGCCACCGCGGCGAGACTCGGCGCCGTGGACGTGGAGAG
rs1544094	chr9:37027317	GCCCCTTTTCTGGGCCTCCAATTTGCCTTCCCCACAGTCTAGTCTCCCCCCGTTCCATATT	GCCCCTTTTCTGGGCCTCCAATTTGCCTTCGCCACAGTCTAGTCTCCCCCCGTTCCATATT
rs7026881	chr9:37034123	TTCTCATGGCAATTGTGAGGACCAAATGATATAACAGCTGGGATTTGCTTCACAAAGTATT	TTCTCATGGCAATTGTGAGGACCAAATGATGTAACAGCTGGGATTTGCTTCACAAAGTATT
rs7026903	chr9:37034179	GTATTGTTAGGATGGGTTTGGAATTCCCCAATGCTGCTTACAGAAAATCTTTTTTTTTTTT	GTATTGTTAGGATGGGTTTGGAATTCCCCAGTGCTGCTTACAGAAAATCTTTTTTTTTTTT
rs11600581	chr11:47405073	CACGGAATTGTCCACGTGGGAAGAACTCAATTGACCATCAGCCTCTACGATTAAAAACATT	CACGGAATTGTCCACGTGGGAAGAACTCAACTGACCATCAGCCTCTACGATTAAAAACATT
rs4237544	chr11:47410847	ATGTCTTAAATTATTCCCTAAACATCCCTTATAGCCTTTAAAAAAAAAATCCAGTATCGTT	ATGTCTTAAATTATTCCCTAAACATCCCTTCTAGCCTTTAAAAAAAAAATCCAGTATCGTT
rs2868459	chr11:47411548	CTCCTTCCCTCCTGCTCACTTACAGGCCTCCCTGCTGCTCCTGAGCACATCAGGCAAGCTC	CTCCTTCCCTCCTGCTCACTTACAGGCCTCGCTGCTGCTCCTGAGCACATCAGGCAAGCTC
rs11604680	chr11:47414115	CTCCTTGGGCTTGGTCTCTGACACTTCAAAACAACCCAACCCCATGTGTGGATTCTGTCCT	CTCCTTGGGCTTGGTCTCTGACACTTCAAAGCAACCCAACCCCATGTGTGGATTCTGTCCT
rs360041	chr1:32830305	GAGAGCCTCAGAGCCGAGCAGAGCCCCAGCATGGAGGAGAACCTGAGCATAGAGGACCTGG	GAGAGCCTCAGAGCCGAGCAGAGCCCCAGCGTGGAGGAGAACCTGAGCATAGAGGACCTGG
rs360040	chr1:32830899	CTGGGATGCTGGCAGGGGATCTACACCGTGGTTGGGTGTGTGGAGGGGTGGATTGACAGAG	CTGGGATGCTGGCAGGGGATCTACACCGTGATTGGGTGTGTGGAGGGGTGGATTGACAGAG
rs4786416	chr16:3438952	GTGTAGCCACGTGGTGGTCATCCTGTGCCACCTCTGGTTTGGTTCTAATCAAAGGAAGCAG	GTGTAGCCACGTGGTGGTCATCCTGTGCCATCTCTGGTTTGGTTCTAATCAAAGGAAGCAG
rs3859147	chr16:3440194	TGAGTTGGGATAATTCACTGTCCCTTGTGCTAGTCTCATGGAGCTTTTCTGCTCTTCTGGG	TGAGTTGGGATAATTCACTGTCCCTTGTGCCAGTCTCATGGAGCTTTTCTGCTCTTCTGGG
rs37834	chr16:3441605	ATGTGCATTAAAACAATGAGACCTTTTTCAGTTAGATTGCAGAAAGGTAAAGAATAATACC	ATGTGCATTAAAACAATGAGACCTTTTTCACTTAGATTGCAGAAAGGTAAAGAATAATACC
rs7359112	chr14:70138367	ATTTTTCAGGAGGGCCTGGTTGGGAGCCTAGTGGGAGGACATTGCAAAAAGGAAGAGTATC	ATTTTTCAGGAGGGCCTGGTTGGGAGCCTACTGGGAGGACATTGCAAAAAGGAAGAGTATC
rs17108267	chr14:70138390	GAGCCTAGTGGGAGGACATTGCAAAAAGGAAGAGTATCGTGTCCAATAAAAAGTGTGATCC	GAGCCTAGTGGGAGGACATTGCAAAAAGGAGGAGTATCGTGTCCAATAAAAAGTGTGATCC
rs7157455	chr14:70140037	CCATCTAGAAAAACAGCTTTCCTTCACACACGCTCCCTTTAAATACCTGACACCATGATCC	CCATCTAGAAAAACAGCTTTCCTTCACACATGCTCCCTTTAAATACCTGACACCATGATCC
rs17108276	chr14:70140636	TGTGGGGTGTTTTTCCTTCTTATTTAGTGAAGAAAAGTCCAGCTACTTCATTATACAAAGC	TGTGGGGTGTTTTTCCTTCTTATTTAGTGAGGAAAAGTCCAGCTACTTCATTATACAAAGC
rs17108278	chr14:70141246	AAGGAAGATCCTTGACTGCCAACTCAATACAGCAGGTAGGGGCTCAAAGTCAAATTGCTGT	AAGGAAGATCCTTGACTGCCAACTCAATACGGCAGGTAGGGGCTCAAAGTCAAATTGCTGT
rs17108280	chr14:70142534	GCCCGGCCTGTTATTAACTTCTAACTCAATTGCGTTGTCCTCAAGGAACATGTTCTACATA	GCCCGGCCTGTTATTAACTTCTAACTCAATCGCGTTGTCCTCAAGGAACATGTTCTACATA
rs7155088	chr14:70143562	ACACACAAACATAAATTTATCTGGAAAATTCTACTCATGTGCAAGCAAGATTAGGCTATGT	ACACACAAACATAAATTTATCTGGAAAATTATACTCATGTGCAAGCAAGATTAGGCTATGT
rs8021911	chr14:70144096	CCCCTTCTCTTCATCAATTCTGTGTTGACTCGATAGGAAATTTTCTTAAGCCACCATAAAA	CCCCTTCTCTTCATCAATTCTGTGTTGACTTGATAGGAAATTTTCTTAAGCCACCATAAAA
rs12435305	chr14:70145096	CAGTTTGTGCTATAAGTTATCTTCAAGTTATAAGCAAATGAAGAGTACCAATGTATATAAT	CAGTTTGTGCTATAAGTTATCTTCAAGTTACAAGCAAATGAAGAGTACCAATGTATATAAT
rs2332431	chr14:70145604	TTACACATAAGAATTTGTCAGATCTCAAAAACAAGATTGGAAATCATAGTGATCATTGTAT	TTACACATAAGAATTTGTCAGATCTCAAAAGCAAGATTGGAAATCATAGTGATCATTGTAT
rs1555090	chr6:24756086	AAAGAGTACCTGTGGAATGCCATGTGAGCACAGAAAGGAGGAAGTGTCTTTTGTAAAGATT	AAAGAGTACCTGTGGAATGCCATGTGAGCAGAGAAAGGAGGAAGTGTCTTTTGTAAAGATT
rs1555089	chr6:24756385	GGCATATAGTAGGAGCTCAATGGATGTCCACTGAATGCTGAAAAGAAGTGAAAGGTAGTAG	GGCATATAGTAGGAGCTCAATGGATGTCCATTGAATGCTGAAAAGAAGTGAAAGGTAGTAG
rs3212236	chr6:24756434	ATTATACTAAGGATACATCATTTTATCCTTACTACCTCTTGCAGTGTCTGGCATATAGTAG	ATTATACTAAGGATACATCATTTTATCCTTGCTACCTCTTGCAGTGTCTGGCATATAGTAG
rs10753269	chr1:33007784	GGAGCCCTGGGTGAACTTGGGAGGGAGCTGTCAGAAGCAGCCACTGCAGGCCAGGGCGCTG	GGAGCCCTGGGTGAACTTGGGAGGGAGCTGACAGAAGCAGCCACTGCAGGCCAGGGCGCTG
rs2098999	chr2:171606543	GCCTGCTCCCACTCCCTGGCCTCTCCCTATCCCTAGCACCCACTCTGGTGTGGAACACAGT	GCCTGCTCCCACTCCCTGGCCTCTCCCTATGCCTAGCACCCACTCTGGTGTGGAACACAGT
rs3755126	chr2:171608215	TGGAGAATACGCTCCAACAGAAGGCAAATAGTAAAATCTCAAGGATATTGCCAAAGCTAAT	TGGAGAATACGCTCCAACAGAAGGCAAATAATAAAATCTCAAGGATATTGCCAAAGCTAAT
rs3755124	chr2:171609531	TAATGTTCTCATTCTGCTTGGCAATTATAACCCTCTTTATGATGGAAGCTGCTGCCATGTT	TAATGTTCTCATTCTGCTTGGCAATTATAATCCTCTTTATGATGGAAGCTGCTGCCATGTT
rs16859050	chr2:171610403	CCTTGGGCTAGAATACTTCATGGGCGATAGCACGTACTTTACATTGCATCACATAGGAATC	CCTTGGGCTAGAATACTTCATGGGCGATAGTACGTACTTTACATTGCATCACATAGGAATC
rs17706531	chr19:12876530	GGCAAGAAACCTGACTTCTCAGAGTACAGGAAGCGGCCAGGTGTAGTCGCTCATGCCTGTA	GGCAAGAAACCTGACTTCTCAGAGTACAGGGAGCGGCCAGGTGTAGTCGCTCATGCCTGTA
rs10451496	chr19:12878876	TTCTTCTTCTGATGCTCTGGTTTATTTGACCGGTTTGACGTCTGATCAGTTAGCGGTTCTG	TTCTTCTTCTGATGCTCTGGTTTATTTGACTGGTTTGACGTCTGATCAGTTAGCGGTTCTG
rs741702	chr19:12885250	AAACAATCCGCCAGCCACTTATGACCACCGAGGGTGGCAGTCCCGGGAGAGGAGGCAAGCT	AAACAATCCGCCAGCCACTTATGACCACCGCGGGTGGCAGTCCCGGGAGAGGAGGCAAGCT
rs17766126	chr14:79756112	AGCATAAAGTTGATAGAGATCAACAAAATGAAAGAAGTTTGTTACAATCTTGTTTTGTGTG	AGCATAAAGTTGATAGAGATCAACAAAATGCAAGAAGTTTGTTACAATCTTGTTTTGTGTG
rs16981265	chr20:19808135	GTGCTTCCGCTGACTGTCCACATGGAATCCGTGGGCTTACAAGGAAGACATTCTTCAGAGG	GTGCTTCCGCTGACTGTCCACATGGAATCCATGGGCTTACAAGGAAGACATTCTTCAGAGG
rs16981268	chr20:19808352	CCGTGGACTTTTTTCATTGTGTGATCTTCAATGCTGATGTGTTGACTTGGACAAACACCCG	CCGTGGACTTTTTTCATTGTGTGATCTTCATTGCTGATGTGTTGACTTGGACAAACACCCG
rs4814918	chr20:19809692	CATGGATAAAGCACTGGTTTCAGTCTAGAGATCTAGTTTCTTACTTTTGCTATCTTTTATT	CATGGATAAAGCACTGGTTTCAGTCTAGAGGTCTAGTTTCTTACTTTTGCTATCTTTTATT
rs6136867	chr20:19810209	CTGGTTGTCATGACATTTCGACCCAAAACATTGTATTTTATTTATTTATTTTTTAAAAGAG	CTGGTTGTCATGACATTTCGACCCAAAACAGTGTATTTTATTTATTTATTTTTTAAAAGAG
rs16981275	chr20:19810533	TTGTGTTTAGAATTTCAATACTCCATTGCTGGGCCAAAGAATATTCCTAGAGTTTCTGTGG	TTGTGTTTAGAATTTCAATACTCCATTGCTAGGCCAAAGAATATTCCTAGAGTTTCTGTGG
rs13037030	chr20:19810847	AGTGACGGAAGCATCAGTCTTACAAAATTCGGACATTCCAAATGTAACCCAGGGAATTTGG	AGTGACGGAAGCATCAGTCTTACAAAATTCAGACATTCCAAATGTAACCCAGGGAATTTGG
rs7273995	chr20:19813344	CTGATCCTGGAATAACATTTGTCTGTCCAACGTGTAAAATATTGAGTAATACAAAGATAAT	CTGATCCTGGAATAACATTTGTCTGTCCAATGTGTAAAATATTGAGTAATACAAAGATAAT
rs4813378	chr20:19813805	AGTCAGAACTGTGAGTAGTGGAATCCAATATAATTGCTTTTGCTGCTTCTTTTGTGGGTTT	AGTCAGAACTGTGAGTAGTGGAATCCAATAGAATTGCTTTTGCTGCTTCTTTTGTGGGTTT
rs6132239	chr20:19815042	TTTACCACAGCAGTCGCTCTTGGGGCCACACGGAAAGCCACCACTGAGTTTACTATAAAGT	TTTACCACAGCAGTCGCTCTTGGGGCCACATGGAAAGCCACCACTGAGTTTACTATAAAGT
rs6136873	chr20:19816798	ACAAGTGGAAAGAAACACAGGGAAGACCCCGTCAAATCTTTAAAGTGGCCACAGCACGGAG	ACAAGTGGAAAGAAACACAGGGAAGACCCCATCAAATCTTTAAAGTGGCCACAGCACGGAG
rs6106149	chr20:19817540	GCAGGGGAAATTCCAAGCCCAAAAAGCTACAGTTAGAATTCAGAACTGTGTTGTTACCCTG	GCAGGGGAAATTCCAAGCCCAAAAAGCTACGGTTAGAATTCAGAACTGTGTTGTTACCCTG
rs2064093	chr6:27550226	ACATTAAACCTGGAAATCCTAACAGAGTGTATGAAAAACAATTACAGTCAAGGGAACATGA	ACATTAAACCTGGAAATCCTAACAGAGTGTGTGAAAAACAATTACAGTCAAGGGAACATGA
rs4713106	chr6:27552693	TCCACCAAATAAAAAGGATGTGATATGCATTAACTATGAACAACAATCTATAGCACAACTT	TCCACCAAATAAAAAGGATGTGATATGCATGAACTATGAACAACAATCTATAGCACAACTT
rs7761966	chr6:27553682	CTTTTCCTCTTCCTTCTTGTCCCTCTTCCTCATTTATCTACTTAGTCGACATGATTTCTTA	CTTTTCCTCTTCCTTCTTGTCCCTCTTCCTTATTTATCTACTTAGTCGACATGATTTCTTA
rs595591	chr6:36004613	CTACAAGATAGGTACTATTCTTTTAATCTCTGACAGGAAAAAACTAAGGCACAACCAAGAT	CTACAAGATAGGTACTATTCTTTTAATCTCCGACAGGAAAAAACTAAGGCACAACCAAGAT
rs482388	chr6:149674215	AATAACCCTCTCCTGTGATCTTCTCCTCTCGAAACTCCCAGAGTAACTTAGTTTCTCTTAA	AATAACCCTCTCCTGTGATCTTCTCCTCTCAAAACTCCCAGAGTAACTTAGTTTCTCTTAA
rs541155	chr6:149674654	TCTCAAAAATGGAAACCATCATTGTTGGCCAGTTGGGAAGATAACAGAATTTTTAAATAAC	TCTCAAAAATGGAAACCATCATTGTTGGCCGGTTGGGAAGATAACAGAATTTTTAAATAAC
rs524161	chr6:149677928	AAAGGCTGAATGACCAAAATTCTGGTTACTCAGAACAGAGGGACAGTTCCATTGTAAAAGG	AAAGGCTGAATGACCAAAATTCTGGTTACTAAGAACAGAGGGACAGTTCCATTGTAAAAGG
rs1446556	chr6:149678799	TTAAAAATTTGCATAAAATACATCATCCTACCATTTCAAAAGCAATTGTTGCCTCTGTACT	TTAAAAATTTGCATAAAATACATCATCCTAACATTTCAAAAGCAATTGTTGCCTCTGTACT
rs12973988	chr19:51484152	CCTGGCTCCAGAGTCCACTATAGGAAAACATTGGAGCCCACTTAATGGGGCTGCTGTGACA	CCTGGCTCCAGAGTCCACTATAGGAAAACACTGGAGCCCACTTAATGGGGCTGCTGTGACA
rs1990567	chr19:51484755	CTGGCTTATCAGAACTGGGTTCATGCACAGGTCTGAGTTTTTGTTGCTGAACCCTCTTTCC	CTGGCTTATCAGAACTGGGTTCATGCACAGTTCTGAGTTTTTGTTGCTGAACCCTCTTTCC
rs10411912	chr19:51487333	CTGCCCCCTAAGTCCTTCAGAGTGTCTATCGGTATTTGTTTACCATTCTTTATTTTCTATT	CTGCCCCCTAAGTCCTTCAGAGTGTCTATCAGTATTTGTTTACCATTCTTTATTTTCTATT
rs8102595	chr19:51489670	CTTCAAACAAGAACATATCCTTTAGCAAAAGTTGGAAATCATTTTAACGGACACATTTCCC	CTTCAAACAAGAACATATCCTTTAGCAAAAATTGGAAATCATTTTAACGGACACATTTCCC
rs17654474	chr19:17899782	ACTGCGCACAGCTTCCTTCTAAGATTTTGAAATGGTGAAAAGTTGCCCAAAGGACAGTGGT	ACTGCGCACAGCTTCCTTCTAAGATTTTGAGATGGTGAAAAGTTGCCCAAAGGACAGTGGT
rs17654485	chr19:17899881	ACTCAAGGGTGACTTACTGAGTCTAGGCCCGTCCTCTCTTTATCGACGTTTCCCCCGATGG	ACTCAAGGGTGACTTACTGAGTCTAGGCCCATCCTCTCTTTATCGACGTTTCCCCCGATGG
rs3758758	chr11:89596236	CTTGCCTTGAGGCTGCGCCTTAGACAGCCCGGTGGGTATCTGTTTACCCCTTAGCACTAAG	CTTGCCTTGAGGCTGCGCCTTAGACAGCCCTGTGGGTATCTGTTTACCCCTTAGCACTAAG
rs2049948	chr22:31132909	AAGTTGTACTGTCCTGTAGTGTATAACTTTAGGATCTTTATTAGTCGATTTCCTCTAAACT	AAGTTGTACTGTCCTGTAGTGTATAACTTTGGGATCTTTATTAGTCGATTTCCTCTAAACT
rs4140572	chr22:31133716	TAAGTGCTGCAAAAAACAGTATGTAGTTTCCATTCATTTGTTGCATTATCTACACTGGTTC	TAAGTGCTGCAAAAAACAGTATGTAGTTTCTATTCATTTGTTGCATTATCTACACTGGTTC
rs9609538	chr22:31134386	CAGGCCATTTCTCAAATAAAAAAACCAAGATTGAAGTTGATAGAAAACAATTTTAATTAAA	CAGGCCATTTCTCAAATAAAAAAACCAAGACTGAAGTTGATAGAAAACAATTTTAATTAAA
rs2837161	chr21:40049482	GGGAAGGCTGTGATTTCATTTTGGTTTGTGCACAGCTGTTGTACAACTTGCTACTGAGGCA	GGGAAGGCTGTGATTTCATTTTGGTTTGTGTACAGCTGTTGTACAACTTGCTACTGAGGCA
rs2837162	chr21:40050094	CAGGTCATGGGCCTGAGAATCTTTGCTGTCTTTCACGCTGACACTGTGGGTTTCATTCAGT	CAGGTCATGGGCCTGAGAATCTTTGCTGTCCTTCACGCTGACACTGTGGGTTTCATTCAGT
rs2837163	chr21:40050484	TAAAGAGACCCTTTCCTGAGGCTAAGGAGTGTTGTTTTGCGGGTGGTTCATGACATGTTCA	TAAAGAGACCCTTTCCTGAGGCTAAGGAGTATTGTTTTGCGGGTGGTTCATGACATGTTCA
rs2837164	chr21:40050706	AGGAACAAGAGGTATACATGGCAGAATCCTTATGTGCTGTCAATGGTCTGGCCAGGCTTTA	AGGAACAAGAGGTATACATGGCAGAATCCTCATGTGCTGTCAATGGTCTGGCCAGGCTTTA
rs2837165	chr21:40050733	CCTTATGTGCTGTCAATGGTCTGGCCAGGCTTTACCCCATCTATCCTGGCCTCCCTGAACT	CCTTATGTGCTGTCAATGGTCTGGCCAGGCCTTACCCCATCTATCCTGGCCTCCCTGAACT
rs2837166	chr21:40051173	GTAATAAGCCCATGATCTGCATTTGGTCAGGCATTCAGAGGTGAGGCTACACCATCTGCAT	GTAATAAGCCCATGATCTGCATTTGGTCAGTCATTCAGAGGTGAGGCTACACCATCTGCAT
rs2837168	chr21:40051851	TGGGTTGTTGCCTGCTTGCTTTATTTTCCCGGGGCCAGGAAGAACATATGGAGGTGCAGGG	TGGGTTGTTGCCTGCTTGCTTTATTTTCCCAGGGCCAGGAAGAACATATGGAGGTGCAGGG
rs2837169	chr21:40051923	CTGTCCTGACTGTGCTGGTCGTCCTGGCACGTAGGGATCGCCTGAGCTTGGTGGGCTGTTC	CTGTCCTGACTGTGCTGGTCGTCCTGGCACATAGGGATCGCCTGAGCTTGGTGGGCTGTTC
rs2837170	chr21:40052318	AGAAATCACCTCCTCCCTGAAGCCTCCTAACCCTTGCCATTTTCAGGGCGAGAATCTCAGT	AGAAATCACCTCCTCCCTGAAGCCTCCTAAACCTTGCCATTTTCAGGGCGAGAATCTCAGT
rs2837171	chr21:40053113	AATGTGTTTGGGGATGAAGATATTCTAAAGTCCTGTAGTAAGCAATGCAAAACGTTCTGGA	AATGTGTTTGGGGATGAAGATATTCTAAAGACCTGTAGTAAGCAATGCAAAACGTTCTGGA
rs2837172	chr21:40053134	ATTCTAAAGTCCTGTAGTAAGCAATGCAAAACGTTCTGGAGGTGTTTATTAAACATTTGTT	ATTCTAAAGTCCTGTAGTAAGCAATGCAAAGCGTTCTGGAGGTGTTTATTAAACATTTGTT
rs2837173	chr21:40053307	TATTTCAGCCGTGGTTACAAAAAACTCTTCTAAAGGTTTGGTGGGCAGTGGATGAACTCTG	TATTTCAGCCGTGGTTACAAAAAACTCTTCCAAAGGTTTGGTGGGCAGTGGATGAACTCTG
rs2837174	chr21:40053355	TGGATGAACTCTGGGTCTAGTGTTTCTGAGATACTTTTTCCTGAAAAAGCTGAGGCAGGCT	TGGATGAACTCTGGGTCTAGTGTTTCTGAGTTACTTTTTCCTGAAAAAGCTGAGGCAGGCT
rs2837175	chr21:40053815	CTGAGGGTCCATCCCAAAATTTGTAATGAATGCAAATTTGTAATGAATACCAAAGCGTTCA	CTGAGGGTCCATCCCAAAATTTGTAATGAACGCAAATTTGTAATGAATACCAAAGCGTTCA
rs2837176	chr21:40054216	AATTGTAACCCCCGAACAATCAGGCCAGGGGTTAGAGACTGCATTGCAGGCCGGTCACTGC	AATTGTAACCCCCGAACAATCAGGCCAGGGCTTAGAGACTGCATTGCAGGCCGGTCACTGC
rs2837177	chr21:40054237	AGGCCAGGGGTTAGAGACTGCATTGCAGGCCGGTCACTGCACATGTGAGAGCCCTGAGGCC	AGGCCAGGGGTTAGAGACTGCATTGCAGGCTGGTCACTGCACATGTGAGAGCCCTGAGGCC
rs2837178	chr21:40054313	GGTTGATAAATTAAAGGAGGTCTGGTGATCGGAGGGTGAAGTTTGGGAAAAATTGTAGCTG	GGTTGATAAATTAAAGGAGGTCTGGTGATCAGAGGGTGAAGTTTGGGAAAAATTGTAGCTG
rs744568	chr21:40055860	GAGAGAAAGCAAGAGGGCAGGGCTCGAGATGTGGATTTGAGAACTGGAGAGAGTTGGCATA	GAGAGAAAGCAAGAGGGCAGGGCTCGAGATATGGATTTGAGAACTGGAGAGAGTTGGCATA
rs741867	chr21:40055925	AGAATCTTCCAAGTGGATAAACTCCTATAAAGAAATCGTGTAGCCAGCAGAGGCCAGGATG	AGAATCTTCCAAGTGGATAAACTCCTATAAGGAAATCGTGTAGCCAGCAGAGGCCAGGATG
rs2410181	chr21:40056465	GAGTCAGCTTTGCAGGCCTATTTCAAGATACGGCAAATAAAACATATTGGGGGTTAAATAT	GAGTCAGCTTTGCAGGCCTATTTCAAGATATGGCAAATAAAACATATTGGGGGTTAAATAT
rs1077589	chr21:40056680	CGCCCGAGAACCTCCCTGTGGCCACTAGCTATGGTTGTCACTAAGGACCAATGGCTGATCT	CGCCCGAGAACCTCCCTGTGGCCACTAGCTTTGGTTGTCACTAAGGACCAATGGCTGATCT
rs2837181	chr21:40056709	ATAGCTAGTGGCCACAGGGAGGTTCTCGGGCGGGAGGAGACATTGATCTTTCCCAGTGCTC	ATAGCTAGTGGCCACAGGGAGGTTCTCGGGTGGGAGGAGACATTGATCTTTCCCAGTGCTC
rs2837183	chr21:40057208	CTCCTGTTTCATCTGAAAGTCAAATCAAGGTCAAGAAGTTTCCATTTGGTGTAGCTCCCTC	CTCCTGTTTCATCTGAAAGTCAAATCAAGGCCAAGAAGTTTCCATTTGGTGTAGCTCCCTC
rs2837184	chr21:40057864	ATGTTTATCCAAATGCTGGCTTAGCCTTAGTGAACTCTCACCTTCTTCAGTTCTGCCTCTC	ATGTTTATCCAAATGCTGGCTTAGCCTTAGAGAACTCTCACCTTCTTCAGTTCTGCCTCTC
rs2837185	chr21:40058518	TTTGGGGCTACCCAGTGTATATGTTGGCAGACCACCTGGTTCACCCACAGGGATCCCACAA	TTTGGGGCTACCCAGTGTATATGTTGGCAGGCCACCTGGTTCACCCACAGGGATCCCACAA
rs6755907	chr2:62030091	TGCTTTAAGTATCTGAAATGTTTCAAGTTACAAACATTTCTTTTTCTGTGAAATTGGAATT	TGCTTTAAGTATCTGAAATGTTTCAAGTTATAAACATTTCTTTTTCTGTGAAATTGGAATT
rs7558608	chr2:62032316	CTTTCATTATTGTAGTACTAACAAGAGTTACAGGCCGGGCGCCTTGGCTCACGCCTGTAAT	CTTTCATTATTGTAGTACTAACAAGAGTTATAGGCCGGGCGCCTTGGCTCACGCCTGTAAT
rs17127578	chr14:53981842	AGGTGGAGTGCTGACTGATTCACACAGTTATATAAGCTGCAGTAGGATGAAGCCCCCTTCA	AGGTGGAGTGCTGACTGATTCACACAGTTACATAAGCTGCAGTAGGATGAAGCCCCCTTCA
rs10162321	chr14:53983767	TGTTCATGTTTTTTTCTGCTCACTATGTACCTTTCCAAAACCTTGGGTTACGGCAGCATGC	TGTTCATGTTTTTTTCTGCTCACTATGTACATTTCCAAAACCTTGGGTTACGGCAGCATGC
rs8007293	chr14:53987417	AAGGTGTTCAGCTCCGATAAATAAAAGTGTTAGTAATCCCTGCCAAGAAGACAACAGACTC	AAGGTGTTCAGCTCCGATAAATAAAAGTGTCAGTAATCCCTGCCAAGAAGACAACAGACTC
rs946520	chr1:117613504	AATGACCATATTTTTATTTTTCAAATTTTTGTTAGTTCTTTCTCATATTTACCTGTTTTTT	AATGACCATATTTTTATTTTTCAAATTTTTATTAGTTCTTTCTCATATTTACCTGTTTTTT
rs3754117	chr1:117621047	ATGGCACATGTTGGTGCTCTATTAATCGAGCCTCGGGGGCCCAATAACGTGAGCATGGGCT	ATGGCACATGTTGGTGCTCTATTAATCGAGTCTCGGGGGCCCAATAACGTGAGCATGGGCT
rs3754118	chr1:117621083	GGGCCCAATAACGTGAGCATGGGCTGCTGCGTGGAAGTTTGAGACCCTGTTGCTGAATCCT	GGGCCCAATAACGTGAGCATGGGCTGCTGCTTGGAAGTTTGAGACCCTGTTGCTGAATCCT
rs4075967	chr21:42109245	CTTGTGCAGCTTCATGTGGTGGCGCAGCGCGTGCTTGGTCTTCATGCCTTCAAGGACACAG	CTTGTGCAGCTTCATGTGGTGGCGCAGCGCATGCTTGGTCTTCATGCCTTCAAGGACACAG
rs6586243	chr21:42109475	GGCCGGGAGGGACTGACTGCAACATCAGGTTCACTCACTCCTGCCAGGGCCTGGCCGAGCC	GGCCGGGAGGGACTGACTGCAACATCAGGTGCACTCACTCCTGCCAGGGCCTGGCCGAGCC
rs4075970	chr21:42109550	AACGCCGGGGCGGTGGGTAAACTTCCCTGCGTGCCCATGGCAACCCGGCGGGAGAATTCGG	AACGCCGGGGCGGTGGGTAAACTTCCCTGCATGCCCATGGCAACCCGGCGGGAGAATTCGG
rs4964607	chr12:106576162	CCTTAACTAAGAATAGCCAACGTGCCACCAACGACATTTATTCTGGCCTCTGGCAAAGAGA	CCTTAACTAAGAATAGCCAACGTGCCACCAGCGACATTTATTCTGGCCTCTGGCAAAGAGA
rs744266	chr12:106581652	GTGAGAAAGTAACATTTAGGGATGTAATGAGATGTAATGGTGGGATCTCCGTGAAACGACA	GTGAGAAAGTAACATTTAGGGATGTAATGAAATGTAATGGTGGGATCTCCGTGAAACGACA
rs4951313	chr1:200854635	CCTGAAGCCCAGGCTCCGGCTCTTGGCGCTACACAGGGACTCTTGCAGATGGCTCCCAGAG	CCTGAAGCCCAGGCTCCGGCTCTTGGCGCTGCACAGGGACTCTTGCAGATGGCTCCCAGAG
rs11571128	chr1:200854911	AGTGCTTCACGCACGCTGGTACAGGGCCACGTGCACAAGCACACAGGTGCACACACACACT	AGTGCTTCACGCACGCTGGTACAGGGCCACATGCACAAGCACACAGGTGCACACACACACT
rs11571093	chr1:200855328	CTGTGGCAGTAGACTGTGGGTCAGAAAGTTCTCCCAGCTCACAGAAGCCAGCTCTGAGTTC	CTGTGGCAGTAGACTGTGGGTCAGAAAGTTGTCCCAGCTCACAGAAGCCAGCTCTGAGTTC
rs12251445	chr10:32385351	ACTGCTGCCCGATCACTCCTGAGGCCGCCGTTGGGCGACAGGGCGGTGCGGGAGGAGGACT	ACTGCTGCCCGATCACTCCTGAGGCCGCCGCTGGGCGACAGGGCGGTGCGGGAGGAGGACT
rs1075453	chr19:54886211	ACCTGAATACCCGGCTAGGGACACGAGAGAGAGGAATCGGGGTTTCTGGGTGACGGTGATC	ACCTGAATACCCGGCTAGGGACACGAGAGACAGGAATCGGGGTTTCTGGGTGACGGTGATC
rs16863657	chr2:222990023	AAGGCTGGGGGTATGGGGGAGGGTGCAGAAAAAAACCTGGCTCCTCTTCTTGGTGTAAAAA	AAGGCTGGGGGTATGGGGGAGGGTGCAGAAGAAAACCTGGCTCCTCTTCTTGGTGTAAAAA
rs6436310	chr2:222993215	GGAACATATGGTTTGTGGGAAGATAGGAAGAGAGAAGGAAAATAGGAAAGGAAAAAGAAAA	GGAACATATGGTTTGTGGGAAGATAGGAAGGGAGAAGGAAAATAGGAAAGGAAAAAGAAAA
rs3761435	chr22:31195128	CTATCAGCGCTACCGTTGTTCCACGCACACAGGGAGTAAGTACTGGGAGTCCCAGCCACCG	CTATCAGCGCTACCGTTGTTCCACGCACACGGGGAGTAAGTACTGGGAGTCCCAGCCACCG
rs7196943	chr16:68149950	TCAGGATAAAGAACAAAATCCTTGGCATAATGTTTAAGATCTTTCACCTCTGCCCTTTTCT	TCAGGATAAAGAACAAAATCCTTGGCATAAAGTTTAAGATCTTTCACCTCTGCCCTTTTCT
rs871699	chr11:18084255	AACAGCAGATGGCGCTGTAGGGGGAGTCCCACCGGGTACGCCGGGCGCTCTGGCACTAGGG	AACAGCAGATGGCGCTGTAGGGGGAGTCCCGCCGGGTACGCCGGGCGCTCTGGCACTAGGG
rs1799957	chr1:183163002	GAAAATACTTTGATTTCTGGAAGAATCTCTTTGAAAATATTTATGGTTGTGACTCTCTTAA	GAAAATACTTTGATTTCTGGAAGAATCTCTGTGAAAATATTTATGGTTGTGACTCTCTTAA
rs12728706	chr1:183171446	TAAACAATGTCTTCACTAAAATAAATCAAGCCATGTTGGGAAAGAAACTAGCTAGGGCTGG	TAAACAATGTCTTCACTAAAATAAATCAAGGCATGTTGGGAAAGAAACTAGCTAGGGCTGG
rs6489536	chr12:4362170	GCTTACCCAGGTCCAAAGCCTCCCCTCCAAGAAGAAGCCCTGTGTGCTTAGCATCTGGCTC	GCTTACCCAGGTCCAAAGCCTCCCCTCCAACAAGAAGCCCTGTGTGCTTAGCATCTGGCTC
rs2075317	chr12:4362576	TTTATTGATAAGTACTTTAGTATCAGCCACATCTGGTGTGGAGAATTAGAATCTCCCAGGT	TTTATTGATAAGTACTTTAGTATCAGCCACGTCTGGTGTGGAGAATTAGAATCTCCCAGGT
rs2075316	chr12:4363067	CCTGCCTGCCATGGGACCAGCCTATCTGCTGCATTCAGGTAGCTACCTGGGAACCAAGGAC	CCTGCCTGCCATGGGACCAGCCTATCTGCTACATTCAGGTAGCTACCTGGGAACCAAGGAC
rs10774227	chr12:4363712	ACAATAACATCAACTTCATTGTCCTTAGCTATGATGAAAAAATGTCAGAGGAATCAAGGTA	ACAATAACATCAACTTCATTGTCCTTAGCTGTGATGAAAAAATGTCAGAGGAATCAAGGTA
rs7316649	chr12:4364031	TGAAGTTCTCTGGAGAGGTGCCATTCCTGTATCTCATCTGAAAATGTCATCCCAGTGTCAT	TGAAGTTCTCTGGAGAGGTGCCATTCCTGTCTCTCATCTGAAAATGTCATCCCAGTGTCAT
rs720333	chr12:4364199	CTACCTTGTAGAAAATCTTTAGAGAAGTCTGAGAATGAAAAGGTACAGTCCTGATCTTCAG	CTACCTTGTAGAAAATCTTTAGAGAAGTCTAAGAATGAAAAGGTACAGTCCTGATCTTCAG
rs16931344	chr12:4365348	CCCCAAGACAAAATTTCCAGCTTATTTTTGTCATGGCAGCCTTTCCAAAATAAAGGCCCAC	CCCCAAGACAAAATTTCCAGCTTATTTTTGCCATGGCAGCCTTTCCAAAATAAAGGCCCAC
rs7131744	chr12:4366541	CATGGGTAGTTAGTTGTCACTTCGTCCACTGCCTGAGACAGCTGCACAACAGGAGAACTGA	CATGGGTAGTTAGTTGTCACTTCGTCCACTACCTGAGACAGCTGCACAACAGGAGAACTGA
rs734075	chr12:4367308	TGGAGGAGCTAACCCACGTGACATGGATGGGTGAGAAATTTTCTTTTGTCTTGTTTTAAAG	TGGAGGAGCTAACCCACGTGACATGGATGGTTGAGAAATTTTCTTTTGTCTTGTTTTAAAG
rs7308018	chr12:4367933	AGCAAATCTAAATATGTAAGTAGAACCTTCACCCTACTTCCCTATAGGAAATACACATGGC	AGCAAATCTAAATATGTAAGTAGAACCTTCGCCCTACTTCCCTATAGGAAATACACATGGC
rs6489538	chr12:4367945	TATGTAAGTAGAACCTTCACCCTACTTCCCTATAGGAAATACACATGGCTTCTGTAATATT	TATGTAAGTAGAACCTTCACCCTACTTCCCAATAGGAAATACACATGGCTTCTGTAATATT
rs12299639	chr12:4368138	AACTTGAGAGCAAAGGCCATTGAAGTCCAGGCCATTGATCAATAGCTGCAGCCTCAACTCC	AACTTGAGAGCAAAGGCCATTGAAGTCCAGACCATTGATCAATAGCTGCAGCCTCAACTCC
rs11063130	chr12:4368375	TTGGGTGATAAGAACAGGGTTATGACTGTTCTACTTAGAGCTAAGCCAGGGAAGAGGGGGA	TTGGGTGATAAGAACAGGGTTATGACTGTTGTACTTAGAGCTAAGCCAGGGAAGAGGGGGA
rs10849051	chr12:4368668	ACTTCCCCCCAAGCTGTTCTTCCTACAAGTCATTGTGAAGCCACAGCTCCTTTTGGCTGGC	ACTTCCCCCCAAGCTGTTCTTCCTACAAGTTATTGTGAAGCCACAGCTCCTTTTGGCTGGC
rs4239142	chr17:39561402	AAAAAAAAGAAACACCCAAAGTTTCTACGTAATCTGATCCCTGCCCATGTCATCTCTCTTT	AAAAAAAAGAAACACCCAAAGTTTCTACGTGATCTGATCCCTGCCCATGTCATCTCTCTTT
rs184478	chr17:39565277	AGTTGTCTCTATCCCTAAGACCCAGATTTTGTTACCTCCTGTCCTGTTGTTTTTGTTTGTT	AGTTGTCTCTATCCCTAAGACCCAGATTTTCTTACCTCCTGTCCTGTTGTTTTTGTTTGTT
rs2236795	chr1:153488844	ACGGCTCAAGATCTGGGGTCCGCCTGCGGGTGGGGTCGCCAGGTGTCCGGCACCAAGGAGT	ACGGCTCAAGATCTGGGGTCCGCCTGCGGGCGGGGTCGCCAGGTGTCCGGCACCAAGGAGT
rs3806412	chr1:153489626	GCCGGAAACCGCAGAGGAGCGAAGCCTGGCGGGATGCAGTGATTGGAGCCAAAGGAACCGT	GCCGGAAACCGCAGAGGAGCGAAGCCTGGCTGGATGCAGTGATTGGAGCCAAAGGAACCGT
rs11264529	chr1:153492418	GCAGGATAAATAGGAGTTAGGCCTGAAAAAAGTTCCCAGCAAACTGAAGTGCAAGCAGGGA	GCAGGATAAATAGGAGTTAGGCCTGAAAAAGGTTCCCAGCAAACTGAAGTGCAAGCAGGGA
rs2909379	chr12:4427858	TGAGATGAGAGATGGTCTTTCTCACTTTGGGTTTGTCCTCTTTAATTGGGTGAGAGATTTT	TGAGATGAGAGATGGTCTTTCTCACTTTGGTTTTGTCCTCTTTAATTGGGTGAGAGATTTT
rs4559494	chr1:153463096	ATCCCCAGAGATGGCCATGAGCAAGCTTAGTGGGTTCTGTGTGCTGCCCCGAGGGAACCTG	ATCCCCAGAGATGGCCATGAGCAAGCTTAGGGGGTTCTGTGTGCTGCCCCGAGGGAACCTG
rs11264516	chr1:153463982	TTGATAAAGACTTTCTGAATGAACTTGTGTCTAAGCTCTGAAACTAAAAATAATGGCCTCT	TTGATAAAGACTTTCTGAATGAACTTGTGTTTAAGCTCTGAAACTAAAAATAATGGCCTCT
rs11264521	chr1:153466221	ATAAATGTTGCAAAGGAATCAAAGGTGACCGATATGGAGCCCTTCCCCAAGGAGCCTATGG	ATAAATGTTGCAAAGGAATCAAAGGTGACCAATATGGAGCCCTTCCCCAAGGAGCCTATGG
rs4804221	chr19:7675188	CCCGGACCCTCCCTCACTTCTTTACCATCTTGGTCCTCGGCCATTACCCCAGATCAAGGTG	CCCGGACCCTCCCTCACTTCTTTACCATCTCGGTCCTCGGCCATTACCCCAGATCAAGGTG
rs17159862	chr19:7675299	GTCATTCACTCAACAGGCATGCACCAAGGGTCACTCGGTCCAGGGTGACAGACAAGGCAGC	GTCATTCACTCAACAGGCATGCACCAAGGGCCACTCGGTCCAGGGTGACAGACAAGGCAGC
rs4631962	chr12:4243393	TATATGCGCTCTGATGGGGGCTCTGTTTGAATTGTAGGAATAAGCTTTAGGTTAGTTTAAG	TATATGCGCTCTGATGGGGGCTCTGTTTGAGTTGTAGGAATAAGCTTTAGGTTAGTTTAAG
rs4319322	chr1:153416495	TATAATGGCCATTAACTCAAAATATATACTTCATTTTGCAGGACTGCACCCAAATCTCACA	TATAATGGCCATTAACTCAAAATATATACTGCATTTTGCAGGACTGCACCCAAATCTCACA
rs12408758	chr1:153421467	GGCCCAAGGCTAACACTGGAGATGGGGGGAACTCAGGATGCAGGAGCGTGGAGGGCAGATT	GGCCCAAGGCTAACACTGGAGATGGGGGGACCTCAGGATGCAGGAGCGTGGAGGGCAGATT
rs11882733	chr19:40748093	CACTGGGCTCCCATCAGCTCTGAGCCATGTATGTCAAACAGCTTGTGTCACCCCCTGCTTA	CACTGGGCTCCCATCAGCTCTGAGCCATGTGTGTCAAACAGCTTGTGTCACCCCCTGCTTA
rs12973004	chr19:40750614	GAAGGTCTTTGCTTGGGTCATTTATTATTTTACCGTGTGTCTAAGCAATACTAACCCCTGT	GAAGGTCTTTGCTTGGGTCATTTATTATTTCACCGTGTGTCTAAGCAATACTAACCCCTGT
rs2047550	chr3:197545926	CCACCAGAATCTAGACACAGAATGCTTCCACCCCTTCAGAAAGCTTCCCATGCCCCATACT	CCACCAGAATCTAGACACAGAATGCTTCCAACCCTTCAGAAAGCTTCCCATGCCCCATACT
rs857591	chr1:182989175	ATGTAAATAGATGACACAGCTTGCACATAACCAACTATCTTATACCTGGTAGAGGCAGGCA	ATGTAAATAGATGACACAGCTTGCACATAAACAACTATCTTATACCTGGTAGAGGCAGGCA
rs1293970	chr1:182989886	GGTGCTTAGAGACACATACTGCTTCTTCTTTGGGACAGCATGCATTAATAGGCACGAGACT	GGTGCTTAGAGACACATACTGCTTCTTCTTCGGGACAGCATGCATTAATAGGCACGAGACT
rs857587	chr1:182992718	AAACCTAGTATCAATTTCTAGTGATACATATATGTGCAAGAAAGAATCTCTGGTCCCTAGC	AAACCTAGTATCAATTTCTAGTGATACATACATGTGCAAGAAAGAATCTCTGGTCCCTAGC
rs4760813	chr12:70609161	AGTTCAGATGGCAGAATTCTGAAGCCATCAGTCAGACACACTAGAATCCTTTCCCGATTGA	AGTTCAGATGGCAGAATTCTGAAGCCATCACTCAGACACACTAGAATCCTTTCCCGATTGA
rs17110451	chr12:70610101	TTACCACAGAAATTCTCATTTTTATGGGTCACTCTGAATTTGATTTTGTGACACTTTTTCC	TTACCACAGAAATTCTCATTTTTATGGGTCGCTCTGAATTTGATTTTGTGACACTTTTTCC
rs4131348	chr12:70610746	GAAGAAGAAGAAGAAAAAAAAGTAGAAGTTTTATATGCCTTATTTTTATTCTTGTTCTCTT	GAAGAAGAAGAAGAAAAAAAAGTAGAAGTTCTATATGCCTTATTTTTATTCTTGTTCTCTT
rs3935748	chr12:70612004	TCAAAATGATAGTTTATGTAGTATTTGAGAGTAATCAGCAGGAACAAATACTTTTTTGTGT	TCAAAATGATAGTTTATGTAGTATTTGAGACTAATCAGCAGGAACAAATACTTTTTTGTGT
rs17110459	chr12:70613289	GACCCCTATTTCATATCTCAGCTGTTTGCCGTCATGGCCATTCATGATCACATGGCCCTCT	GACCCCTATTTCATATCTCAGCTGTTTGCCATCATGGCCATTCATGATCACATGGCCCTCT
rs4570625	chr12:70618190	TACACTCACACATTTGCATGCACAAAATTAGAATATGTCAAGTCAGAAAAAGCTTATTAAC	TACACTCACACATTTGCATGCACAAAATTATAATATGTCAAGTCAGAAAAAGCTTATTAAC
rs12742817	chr1:153400105	ATTAGTGGAAAAAGCAGAAACTTCTAGGCTTGACTCAATGACTGTATTGTGCGTGATTTGG	ATTAGTGGAAAAAGCAGAAACTTCTAGGCTCGACTCAATGACTGTATTGTGCGTGATTTGG
rs2365714	chr1:153401822	CTCTTTTGGAGAGGTTTCCAAAGTCCTTCTGTCCTCAGAAATTCTCATGTTCCTCCCCAGG	CTCTTTTGGAGAGGTTTCCAAAGTCCTTCTATCCTCAGAAATTCTCATGTTCCTCCCCAGG
rs929797	chr19:38378831	GAGGAGGAAAGCAGAACTCCCCAGCCACCCCTCAAGCACCCACCTCCGTGGGGTTTGGCCC	GAGGAGGAAAGCAGAACTCCCCAGCCACCCTTCAAGCACCCACCTCCGTGGGGTTTGGCCC
rs6606743	chr12:108741899	CTGGCTCTGTCGCCCCCTACTCACAGGAGCGATGACTTCCCCTGTTCTTAGACCAAAAACC	CTGGCTCTGTCGCCCCCTACTCACAGGAGCAATGACTTCCCCTGTTCTTAGACCAAAAACC
rs1859251	chr17:36350144	CAAAAATCTGCAACAAGTGGCTCAGCGTTGCTTTTCTTTCCAGTCCTGCGATTCCAAAAAT	CAAAAATCTGCAACAAGTGGCTCAGCGTTGTTTTTCTTTCCAGTCCTGCGATTCCAAAAAT
rs929268	chr17:36354258	TCAGGCTTATACCAAGGTACTGAATGATAAGTATGTCACTCAGATGATGATGACTTCATCG	TCAGGCTTATACCAAGGTACTGAATGATAAATATGTCACTCAGATGATGATGACTTCATCG
rs11078965	chr17:36354910	TCAGTGTGGTTCATGTTGCGGCAGGGCAAGGGTATGCAAGGCTGTTGGAAGGTCCTTGCTC	TCAGTGTGGTTCATGTTGCGGCAGGGCAAGAGTATGCAAGGCTGTTGGAAGGTCCTTGCTC
rs9902380	chr17:36355329	TTACAGGCGCGAGCCACTGCATGCGGCCAATGTTGCTTCTTATTCAGAAACAAACCTTAAT	TTACAGGCGCGAGCCACTGCATGCGGCCAACGTTGCTTCTTATTCAGAAACAAACCTTAAT
rs11867860	chr17:36355699	AAGGGACTGCCCCTGTCCAGAGGAGAGACAATGGAAGTTTGCTTGTTAATTTTGATTGACT	AAGGGACTGCCCCTGTCCAGAGGAGAGACATTGGAAGTTTGCTTGTTAATTTTGATTGACT
rs17843034	chr17:36355796	GCATTAACTACTTTTCTGCCGTGAGAAAGAAGACATAATAATAGTCAATAATAAATTGACT	GCATTAACTACTTTTCTGCCGTGAGAAAGAGGACATAATAATAGTCAATAATAAATTGACT
rs11870161	chr17:36355958	GTATATGTTTGATATGTGTCCTATTCAGTAGGCTTTTAGACAGGGAGTAATCATATGTTTT	GTATATGTTTGATATGTGTCCTATTCAGTATGCTTTTAGACAGGGAGTAATCATATGTTTT
rs17843033	chr17:36356719	GCTATGTAATAGGTGTGTACTTTACATACATGAGCCACATAATTGGTATGTAACAAACATA	GCTATGTAATAGGTGTGTACTTTACATACAGGAGCCACATAATTGGTATGTAACAAACATA
rs17843032	chr17:36356767	TGTAACAAACATACTTGAACTATGTAATTTTCAAGCAATGTACACACATGATACATGTAAT	TGTAACAAACATACTTGAACTATGTAATTTGCAAGCAATGTACACACATGATACATGTAAT
rs17843031	chr17:36357028	TAGATGAAAAAGTCTAGCCTAAAAGCTATAATTCTGTCCCCAGGTGAACTTAAGGAGAAAC	TAGATGAAAAAGTCTAGCCTAAAAGCTATAGTTCTGTCCCCAGGTGAACTTAAGGAGAAAC
rs10491139	chr17:36357068	CATGGACTAAGTTTATAAAATGTAAACTCCTGAAGTTCCTGTTTCTCCTTAAGTTCACCTG	CATGGACTAAGTTTATAAAATGTAAACTCCCGAAGTTCCTGTTTCTCCTTAAGTTCACCTG
rs886426	chr17:36357302	AACACACACAGACACATTTTCATAATAGTATCACTGAGTACTTTTTAATGTATAATGCATA	AACACACACAGACACATTTTCATAATAGTACCACTGAGTACTTTTTAATGTATAATGCATA
rs6578993	chr11:2157739	GGGCGGGAAGGGAGGAGCAGCCCAGGCCTCTAGTTCTTGTTTCAGATGAGGGTTGGACGTG	GGGCGGGAAGGGAGGAGCAGCCCAGGCCTCCAGTTCTTGTTTCAGATGAGGGTTGGACGTG
rs12968911	chr18:27201259	CATTTCAACTTCTACAAAATAAAAACTGACAAAGATGATAAAAATGAAGACATCGAGAATG	CATTTCAACTTCTACAAAATAAAAACTGACGAAGATGATAAAAATGAAGACATCGAGAATG
rs9950246	chr18:27203850	CTATTGATGCACAAAACTCTGAGTATGAATCGCAAAATAATTGTGCTGAGTGACAAATGTC	CTATTGATGCACAAAACTCTGAGTATGAATTGCAAAATAATTGTGCTGAGTGACAAATGTC
rs1426312	chr18:27206354	GCAGAATTGTTTATAAAAACCTATCCTATGCGAAAACATAATCATTATCAATTGCAAAAAA	GCAGAATTGTTTATAAAAACCTATCCTATGTGAAAACATAATCATTATCAATTGCAAAAAA
rs12960550	chr18:27208109	TACATTTCTGTTTTTCAAAGAGGACTTGTATTGGCATGTATTGAATTCCTTGCCTTTTGTG	TACATTTCTGTTTTTCAAAGAGGACTTGTACTGGCATGTATTGAATTCCTTGCCTTTTGTG
rs8099619	chr18:27210320	CGTCATTATTCTATCTTTCTTCCTATACCATACTTGAGTCCTGATGACTTTCAACAATGGC	CGTCATTATTCTATCTTTCTTCCTATACCACACTTGAGTCCTGATGACTTTCAACAATGGC
rs639679	chr17:44254253	AAAAAACTTCCTTGGTGCAATGAAACTTCATATATGTTAGTTTCTTTTTTGCTGTAATATA	AAAAAACTTCCTTGGTGCAATGAAACTTCACATATGTTAGTTTCTTTTTTGCTGTAATATA
rs17388917	chr17:44255025	TTGAACTCCCGACCTCAGGTGATCCGCCCACCTCGGCCTCCCAAAGTGCTGGGATTACAGG	TTGAACTCCCGACCTCAGGTGATCCGCCCAACTCGGCCTCCCAAAGTGCTGGGATTACAGG
rs3760449	chr17:44261399	TTCCTGGCTTACTCATCATTTCCCACCATCCGTTCATCTCAGTTGAATGCCACCAGTCTTG	TTCCTGGCTTACTCATCATTTCCCACCATCTGTTCATCTCAGTTGAATGCCACCAGTCTTG
rs606911	chr17:44263227	TAGGTTTATTTCGGTGAGATTGCTGCTCAGGACTTAGGAGAGCCATCAAAGGCAGAAGACC	TAGGTTTATTTCGGTGAGATTGCTGCTCAGAACTTAGGAGAGCCATCAAAGGCAGAAGACC
rs8076178	chr17:44263279	CAGAAGACCGCTCCTGGGGCCCGGTCACCTGAACACTACAAGTCCCAGCAAGCGCCGCGCG	CAGAAGACCGCTCCTGGGGCCCGGTCACCTCAACACTACAAGTCCCAGCAAGCGCCGCGCG
rs10486802	chr7:39497008	ACAATCTAATGGTCATGTTCTCAATACCCAGGTAAAAGAGTGGCTGAATTTGTGTTTGTTG	ACAATCTAATGGTCATGTTCTCAATACCCAAGTAAAAGAGTGGCTGAATTTGTGTTTGTTG
rs17171612	chr7:39497704	AAGCATTTCTCAGGGTTAAGTCAGACTGCAAACATTTGTGTATTCATTCATTCATTCAATG	AAGCATTTCTCAGGGTTAAGTCAGACTGCAGACATTTGTGTATTCATTCATTCATTCAATG
rs10498313	chr14:29468627	GAGACTTACAAAAAGCTAGTTTCACTTGAGATTCAAGAGCGCTGAAGACATTCATGTTTTA	GAGACTTACAAAAAGCTAGTTTCACTTGAGGTTCAAGAGCGCTGAAGACATTCATGTTTTA
rs4796750	chr17:37368070	GGTGTTAAGCGCAGTAGCCGACCCCCATTCATGCTTCCCGCAGGCCAGGCATTCTTTCAAA	GGTGTTAAGCGCAGTAGCCGACCCCCATTCGTGCTTCCCGCAGGCCAGGCATTCTTTCAAA
rs11264535	chr1:153535497	ATTTTGCCAAATTCTGCGAGACTACATTTTGGCCTAGGTTATATGCTAAGAAGTGATAGAA	ATTTTGCCAAATTCTGCGAGACTACATTTTCGCCTAGGTTATATGCTAAGAAGTGATAGAA
rs16837638	chr1:153538026	CTCAGTGAAATGATTCTGTTGATGCTGGTGCGCACTTCTACATTTATGTGGGGAAGGAGGT	CTCAGTGAAATGATTCTGTTGATGCTGGTGTGCACTTCTACATTTATGTGGGGAAGGAGGT
rs9427242	chr1:153538074	TGGGGAAGGAGGTCAGGACAGAAGTTGAGGGACTTGGGACCCCAAAGCAGATAAGGTTGTG	TGGGGAAGGAGGTCAGGACAGAAGTTGAGGAACTTGGGACCCCAAAGCAGATAAGGTTGTG
rs6657293	chr1:153541922	CTGGGTTCTTTTTTCAGCTCTTTCCAAGAATTATGGTGACAATGAATGGCTCCTTGGACCT	CTGGGTTCTTTTTTCAGCTCTTTCCAAGAACTATGGTGACAATGAATGGCTCCTTGGACCT
rs17776016	chr16:76605318	CTAATGCACTAGAGAAGTTATTGGAAGTCACTTTCTAAGTCCCAAAACCAAGGTTTATTTT	CTAATGCACTAGAGAAGTTATTGGAAGTCATTTTCTAAGTCCCAAAACCAAGGTTTATTTT
rs11864315	chr16:76607457	ACAGTAATGGTGGAAGTGGTGGAAACAGAGCAAGTCAAGTACAGCAATGTCAGGGGAACTT	ACAGTAATGGTGGAAGTGGTGGAAACAGAGTAAGTCAAGTACAGCAATGTCAGGGGAACTT
rs3109095	chr16:76607647	AGTCTCTGAACATTGTCCATGATGGAAAATTGACTACCTAGAAGCAAGGCTGCTAGTTTTA	AGTCTCTGAACATTGTCCATGATGGAAAATGGACTACCTAGAAGCAAGGCTGCTAGTTTTA
rs12597064	chr16:76607822	ATTTCACAATGACCTCCTAGGTAAGCCCAAAAAGCCCCATATCCCTTCACCACCAGGTGGG	ATTTCACAATGACCTCCTAGGTAAGCCCAAGAAGCCCCATATCCCTTCACCACCAGGTGGG
rs2735410	chr16:76609767	ACAAGACAAGCAGAGCTTCTCCAGTGCCGAGTGTGATGATTTCTTAGTGTGACTCCAAGTG	ACAAGACAAGCAGAGCTTCTCCAGTGCCGAATGTGATGATTTCTTAGTGTGACTCCAAGTG
rs7709291	chr5:35884320	TCACCTCCTGCTGTGTGTCCTGGCTCCTAAGAGGCCACAGAGCAGTACCAGTCTGTGGCCC	TCACCTCCTGCTGTGTGTCCTGGCTCCTAACAGGCCACAGAGCAGTACCAGTCTGTGGCCC
rs6890853	chr5:35888068	GCAGCCGGAGCTGCTGTGAACTGTTTGTCCGCTGGGAAGGCCAGAGAGGGAGACACTGAGC	GCAGCCGGAGCTGCTGTGAACTGTTTGTCCACTGGGAAGGCCAGAGAGGGAGACACTGAGC
rs1494562	chr5:35890022	TTGGACTGTGGTAGAAGCAAGCAGTTTGGCGTGGCAACTGACTTGGCCATATTTCTTCTCC	TTGGACTGTGGTAGAAGCAAGCAGTTTGGCATGGCAACTGACTTGGCCATATTTCTTCTCC
rs2172749	chr5:35891021	CATTACAATTATTTGACAATAACGAAGTAACAAAAAAAGGAGGTGGGACATTTGTACCAGT	CATTACAATTATTTGACAATAACGAAGTAAGAAAAAAAGGAGGTGGGACATTTGTACCAGT
rs847156	chr2:176788068	GCTCCTCAGCCAAATCCTGTTCCATTCTCTTAATCACCAGCCAAGCCACTCTCCCGCCACT	GCTCCTCAGCCAAATCCTGTTCCATTCTCTCAATCACCAGCCAAGCCACTCTCCCGCCACT
rs847155	chr2:176788087	TTCCATTCTCTTAATCACCAGCCAAGCCACTCTCCCGCCACTACTTTCCACCCCGATCCTC	TTCCATTCTCTTAATCACCAGCCAAGCCACCCTCCCGCCACTACTTTCCACCCCGATCCTC
rs30499	chr5:133469625	GGGCTGGCAGCCTCTCTACAGAGGTGAAGCGTCTACTGGATCACTTTTGACCAACAACACA	GGGCTGGCAGCCTCTCTACAGAGGTGAAGCATCTACTGGATCACTTTTGACCAACAACACA
rs168649	chr5:133472819	AGGCCCTAGGGATAAGCAACAAAGCCCTGTATAGCCCTGTCTTAAAAAGCGATATTGAATA	AGGCCCTAGGGATAAGCAACAAAGCCCTGTGTAGCCCTGTCTTAAAAAGCGATATTGAATA
rs244948	chr5:133472960	TTCCTCTGTGAAGCTGCAGGTGACCCCCACATGAACACCAGGCCTTGGTGTGCTCCACCTT	TTCCTCTGTGAAGCTGCAGGTGACCCCCACGTGAACACCAGGCCTTGGTGTGCTCCACCTT
rs244950	chr5:133473527	ACTCCCGACCCCTTGGACAACTGGTACACCCGGCAGCCTAGGACCTGGCACACAGTGGCCA	ACTCCCGACCCCTTGGACAACTGGTACACCTGGCAGCCTAGGACCTGGCACACAGTGGCCA
rs756699	chr5:133474474	GAAAAGGAAAGGAAATGTATATTTTCAGCTCTAGCCATGATTAAGTGGGCTCAGGCCATGA	GAAAAGGAAAGGAAATGTATATTTTCAGCTTTAGCCATGATTAAGTGGGCTCAGGCCATGA
rs2432265	chr5:133475342	TCAGCATTTGTCTGCCAAGACCACAAGGCAAATAAGGACTCCCTCTGGAATTTTATAATGG	TCAGCATTTGTCTGCCAAGACCACAAGGCAGATAAGGACTCCCTCTGGAATTTTATAATGG
rs244657	chr5:133476749	CCAGCCTCTTCCCAGGGTGGGCTTGCCGCTTAGTCTCGCCTCATCTGCTCCGGATTGGCGG	CCAGCCTCTTCCCAGGGTGGGCTTGCCGCTCAGTCTCGCCTCATCTGCTCCGGATTGGCGG
rs244656	chr5:133477726	TTCCTTCTAGGCCGCCTGCATACAGTGCGAACATAAGTATACCCCCCTTCGCACATTTATT	TTCCTTCTAGGCCGCCTGCATACAGTGCGATCATAAGTATACCCCCCTTCGCACATTTATT
rs2764406	chr1:153148184	GTGGCAGCAGGGGCTGGGGGCCTAGGATAGACACATTCAGGAAGGACCATCAGACCAGCAG	GTGGCAGCAGGGGCTGGGGGCCTAGGATAGGCACATTCAGGAAGGACCATCAGACCAGCAG
rs6665760	chr1:153149865	TTATACAAAGGATTCTGACCTGATATACCTTTTGCCCCAGGAAGGGCTAGAAAGCAAGCTT	TTATACAAAGGATTCTGACCTGATATACCTCTTGCCCCAGGAAGGGCTAGAAAGCAAGCTT
rs12648232	chr4:17288806	AAAGGTACATTCAAATCATACTAACATTCCATTCCCAACCAGTTGGTTGTTAAACAAATCA	AAAGGTACATTCAAATCATACTAACATTCCGTTCCCAACCAGTTGGTTGTTAAACAAATCA
rs4698630	chr4:17290961	AGATCATTAAATAGTGCCTGGGAAGTGGAGCGCTCAGTAAGTGTGCTGGGTAATAACTGTA	AGATCATTAAATAGTGCCTGGGAAGTGGAGGGCTCAGTAAGTGTGCTGGGTAATAACTGTA
rs10019856	chr4:17292011	CTTTGATGTAACCATAAATATTTAAAGACATCAGTGCCGGGCACATTGGGAACCTCAACAA	CTTTGATGTAACCATAAATATTTAAAGACAACAGTGCCGGGCACATTGGGAACCTCAACAA
rs2286773	chr4:17292483	TGCGCGGAAGCCGGCTCAGAAGCTCACGTGGCTGGTGTAGTAGGCGTGGTCACGTGACAGG	TGCGCGGAAGCCGGCTCAGAAGCTCACGTGTCTGGTGTAGTAGGCGTGGTCACGTGACAGG
rs416422	chr22:16429911	TGTGAGGGTTTTAAAAATGTATTTATTAAGGACTCTTTGGTTACCAAGTTACAGAACTCTA	TGTGAGGGTTTTAAAAATGTATTTATTAAGCACTCTTTGGTTACCAAGTTACAGAACTCTA
rs3761750	chr5:169657817	GGGTGCCTGACTCACTCACTCCTTGAGGACCCTCTCATGACAACTGTAAAGAGGCAGCTGA	GGGTGCCTGACTCACTCACTCCTTGAGGACGCTCTCATGACAACTGTAAAGAGGCAGCTGA
rs3761749	chr5:169658405	CTCAGGAAGGCACCACCTCAAGGACCAACATAGCATCACTTAGTAAAGGCAACAGCCTTGG	CTCAGGAAGGCACCACCTCAAGGACCAACACAGCATCACTTAGTAAAGGCAACAGCCTTGG
rs17672051	chr5:169662764	GGCCAGCCTGTGCAAGGCAACGAGAAGCAATATTTTCCACTTCCTCCCAGTTGACAATTTC	GGCCAGCCTGTGCAAGGCAACGAGAAGCAACATTTTCCACTTCCTCCCAGTTGACAATTTC
rs876302	chr5:169666648	CTTTTCCATGTAACTTAACGTATTCAGATTCGAAAATGAAGATGTGGACATCTCTGGGGGG	CTTTTCCATGTAACTTAACGTATTCAGATTTGAAAATGAAGATGTGGACATCTCTGGGGGG
rs4073930	chr16:23103147	AGCTTCCAGAATCACAGCTTCTGTTGAACATTCACAGAGGAGGGCTGCAGTTTTATTTGAC	AGCTTCCAGAATCACAGCTTCTGTTGAACACTCACAGAGGAGGGCTGCAGTTTTATTTGAC
rs4073931	chr16:23103218	ACCTGGACCTAGATTTTAAAAACAAACTCTCGCTAATTTTTTTCTTTCTTTCCTTCTTCTT	ACCTGGACCTAGATTTTAAAAACAAACTCTTGCTAATTTTTTTCTTTCTTTCCTTCTTCTT
rs4073291	chr16:23103494	AAAGCTAGGAGGCTTCCAAGCTTATGATGCTAGTGGGTTTAAGGCCTCAGATGGAAAGGAA	AAAGCTAGGAGGCTTCCAAGCTTATGATGCGAGTGGGTTTAAGGCCTCAGATGGAAAGGAA
rs4073290	chr16:23103628	ACCAGAGAGGACCCATGTCTGTGACTTCGATGTGCCCCATCAAGATTTTTAGGCAGTATTC	ACCAGAGAGGACCCATGTCTGTGACTTCGACGTGCCCCATCAAGATTTTTAGGCAGTATTC
rs4073289	chr16:23103644	CAGGGTGGTCCCCAGGACCAGAGAGGACCCATGTCTGTGACTTCGATGTGCCCCATCAAGA	CAGGGTGGTCCCCAGGACCAGAGAGGACCCGTGTCTGTGACTTCGATGTGCCCCATCAAGA
rs7404408	chr16:23104239	GTAAAGTTTGTATAGTTGAGATGCATCGTGCACATTGATGAATGTGATAATTTGCCTTCCA	GTAAAGTTTGTATAGTTGAGATGCATCGTGTACATTGATGAATGTGATAATTTGCCTTCCA
rs5731	chr16:23105046	CCAGCTCACCTGCTTCTCTTCTTTGCCCCTCCAGCACGCCCGTCCTCAGAGTCCCGTCCTC	CCAGCTCACCTGCTTCTCTTCTTTGCCCCTGCAGCACGCCCGTCCTCAGAGTCCCGTCCTC
rs4827267	chrX:40947770	TTCCCACCAGTTAGTGTAGCTGTGCGGCGGCATTTACATATTATAATACATTGTTTTATTA	TTCCCACCAGTTAGTGTAGCTGTGCGGCGGGATTTACATATTATAATACATTGTTTTATTA
rs794442	chr19:7816854	GGGCTGCTGGCACGGCCAAGAGCAATTACTTTCGACTGTTAATTGTCTGGCGCTGCCAATG	GGGCTGCTGGCACGGCCAAGAGCAATTACTCTCGACTGTTAATTGTCTGGCGCTGCCAATG
rs2321049	chr8:25338766	TAATAAACCCCCGGCATTTAGTGAGCATTCAGTAAGTATAGGTTTGAATGAATGAATGAAC	TAATAAACCCCCGGCATTTAGTGAGCATTCGGTAAGTATAGGTTTGAATGAATGAATGAAC
rs1288363	chr1:53320802	CCAAGGGACTGGCTTCTGGGGTCTCAGCCTCCCTTTCTGAAAAATGAAGGTGGGAACCCTG	CCAAGGGACTGGCTTCTGGGGTCTCAGCCTGCCTTTCTGAAAAATGAAGGTGGGAACCCTG
rs1320594	chr1:53322393	GCTTATAAGAAAGTGGAGAGACCCCAAGAACGGACTAATTCACACTAAAGTGTAAGTGACT	GCTTATAAGAAAGTGGAGAGACCCCAAGAAAGGACTAATTCACACTAAAGTGTAAGTGACT
rs2486634	chr1:53322873	TTACAGTAGCGGCTGTGTCGGAGGAAGTCACCAAGTGGAGAATAGAGAATCCCACCCCTCC	TTACAGTAGCGGCTGTGTCGGAGGAAGTCAGCAAGTGGAGAATAGAGAATCCCACCCCTCC
rs1769318	chr1:53323422	CAAAGTTGGAGGGTATATTGGCAGGGGCAGCGGGGTGCTAGGGATAGCCTGAGGAGCAAGG	CAAAGTTGGAGGGTATATTGGCAGGGGCAGGGGGGTGCTAGGGATAGCCTGAGGAGCAAGG
rs1679931	chr1:53323472	GAGGAGCAAGGTGTTGTATAATGGGCAGCAGGCGGCCTCAGAGATGCTTCTGGGGAGGCTT	GAGGAGCAAGGTGTTGTATAATGGGCAGCAAGCGGCCTCAGAGATGCTTCTGGGGAGGCTT
rs1769320	chr1:53323627	AGCAGGTGTGCAGTTGAGCTGTTCTTCACCGGGCCCTCTGCTTGGGTTATGCTGTGGGGAG	AGCAGGTGTGCAGTTGAGCTGTTCTTCACCAGGCCCTCTGCTTGGGTTATGCTGTGGGGAG
rs1679933	chr1:53323720	AATGATTAATGATTCGCCAGGGCTACAGGCAGGGCCAACCCAGCCTGGGAAGGCGGGGATA	AATGATTAATGATTCGCCAGGGCTACAGGCGGGGCCAACCCAGCCTGGGAAGGCGGGGATA
rs1679934	chr1:53323985	TTTAGGTCTGGCCGGGTGAGCTCCCATCTGGGTCTGTCGTGACGACAGCTCGGGGTATGTT	TTTAGGTCTGGCCGGGTGAGCTCCCATCTGAGTCTGTCGTGACGACAGCTCGGGGTATGTT
rs10888768	chr1:53327562	TGAGGCTGCTCTAGAACTTAGGGTCAGTGGCTCGAGGTTCCTTGTTGCTTGTCTTCTTCTC	TGAGGCTGCTCTAGAACTTAGGGTCAGTGGTTCGAGGTTCCTTGTTGCTTGTCTTCTTCTC
rs1171551	chr1:153285287	ACCTCATGGTGACCATGACTAGAGATGGTGATAATAGTAGCTAACTCAGAAATTTAGTGTG	ACCTCATGGTGACCATGACTAGAGATGGTGGTAATAGTAGCTAACTCAGAAATTTAGTGTG
rs1171554	chr1:153287192	CAGCCATCTGGACAATCTCCAGCCCCCTATGTCCATCCACCTCATCCCTTCCATTAGCTGA	CAGCCATCTGGACAATCTCCAGCCCCCTATATCCATCCACCTCATCCCTTCCATTAGCTGA
rs10159180	chr1:153293397	TTATTGTTTTTTGGTGGACTGGAGTTTGAATGAGGTAACGATCAAGAGGGAAAGACTCGTC	TTATTGTTTTTTGGTGGACTGGAGTTTGAACGAGGTAACGATCAAGAGGGAAAGACTCGTC
rs10826176	chr10:59811543	ACAGAAAAAATAAGCTAGGAGATATTCAAGGTGTAAAATTTTTTCTCATTGCTGCAATGCA	ACAGAAAAAATAAGCTAGGAGATATTCAAGATGTAAAATTTTTTCTCATTGCTGCAATGCA
rs9971282	chr10:59812122	AATGTGTCCTTCTATTGGCAAATGACACTTCTAACAGGTAGTTGTTCTCTATGGGGCTAAA	AATGTGTCCTTCTATTGGCAAATGACACTTTTAACAGGTAGTTGTTCTCTATGGGGCTAAA
rs9971104	chr10:59812806	GTTTTAATTTTTCATCAACTACCACAATGTGTCTGCTCAAATATTACTAATTTAAGAAATA	GTTTTAATTTTTCATCAACTACCACAATGTTTCTGCTCAAATATTACTAATTTAAGAAATA
rs4390300	chr10:59814213	CTGGTATTTAAGGGCTGGAAGGACCCTTAGGTATCTTTAGGTCTTCCTAATCTTTTTCATG	CTGGTATTTAAGGGCTGGAAGGACCCTTAGATATCTTTAGGTCTTCCTAATCTTTTTCATG
rs2279340	chr10:59814890	CGGCCTCACCCCAACCCGGCGTTGGCCGGTGTCCGCCCGTGACGGTCACAAGGGCTGTACG	CGGCCTCACCCCAACCCGGCGTTGGCCGGTATCCGCCCGTGACGGTCACAAGGGCTGTACG
rs2279339	chr10:59815004	GCCTGCGGAGGGCTCTGGCTTCGAGGCGGCGCTGTTGAGCCACCTCTGTCCCCGGCCGCCC	GCCTGCGGAGGGCTCTGGCTTCGAGGCGGCTCTGTTGAGCCACCTCTGTCCCCGGCCGCCC
rs12247015	chr10:59815085	TCATCTCCGCGGCTCTTATTCCTCCCCCGCAAGGCCGCCCACCGGGGTACGCTCTCCCGCG	TCATCTCCGCGGCTCTTATTCCTCCCCCGCGAGGCCGCCCACCGGGGTACGCTCTCCCGCG
rs16994347	chr20:47086768	TGAGATTCTTTATATGCCTCTTGAATCTATTAACTTTGTTGTTGCTAGTTACAAAATGTAA	TGAGATTCTTTATATGCCTCTTGAATCTATGAACTTTGTTGTTGCTAGTTACAAAATGTAA
rs6019603	chr20:47086813	TAGTTACAAAATGTAATTGTAAGGATCAAGTAGTGGCTATTGGTTCAGCCAGTACACATTG	TAGTTACAAAATGTAATTGTAAGGATCAAGCAGTGGCTATTGGTTCAGCCAGTACACATTG
rs927160	chr20:47087971	GGGAGCTTAACTTCTGAAGTCTTAGTGATTCATAGGTGTGCATAGAATGTGTGATTCCACA	GGGAGCTTAACTTCTGAAGTCTTAGTGATTGATAGGTGTGCATAGAATGTGTGATTCCACA
rs2051565	chrX:100272991	GGATCAGTCAAATTAATTAGGTTCCTGGGGCTGGAAAGCACATAAGGGAGGGCCTGCTCAG	GGATCAGTCAAATTAATTAGGTTCCTGGGGTTGGAAAGCACATAAGGGAGGGCCTGCTCAG
rs5921751	chrX:100276004	AATGTGCATATGTCTAGCAGTCTGGGCTGAAAGGAGGATAGGAAGGTTGATAATGTGAAAG	AATGTGCATATGTCTAGCAGTCTGGGCTGATAGGAGGATAGGAAGGTTGATAATGTGAAAG
rs6066472	chr20:45855335	CTACACTCCAGTTAGGAAACTAACAGAAGTCTTGGAAATTTTGACGATAAAAATTGCATTT	CTACACTCCAGTTAGGAAACTAACAGAAGTGTTGGAAATTTTGACGATAAAAATTGCATTT
rs2904026	chr20:45858145	TTCACTCAGGGTCATAAGGCATCACACGCCTGGCTATTGGAGTTCTCAGCCGGTGGTGTCT	TTCACTCAGGGTCATAAGGCATCACACGCCGGGCTATTGGAGTTCTCAGCCGGTGGTGTCT
rs2869221	chr20:45858329	GACCCCCAAACAGGCATTGTTCTTGGGTTATCCACAGGCTGAGTTCTGACCCTGCAGTGTC	GACCCCCAAACAGGCATTGTTCTTGGGTTACCCACAGGCTGAGTTCTGACCCTGCAGTGTC
rs3110496	chr17:24941897	CAGGGGTGCTCAAGTTGGTCGATTATCCCAACGGTGCCAGAGCGGCAGTGATTTGTGGGTG	CAGGGGTGCTCAAGTTGGTCGATTATCCCAGCGGTGCCAGAGCGGCAGTGATTTGTGGGTG
rs4807510	chr19:3743245	CCTGATTGGATTGCAAACTTCTCTAAGGCAGGGCACGATTCTTATTCTTCTCTACAAATAC	CCTGATTGGATTGCAAACTTCTCTAAGGCATGGCACGATTCTTATTCTTCTCTACAAATAC
rs9676784	chr19:3745099	TCCCCCAGCTCTTCTCAAGGCCAGCTACTTCTCTGCACTTTCAGCTTCTCCAAGAGACCCT	TCCCCCAGCTCTTCTCAAGGCCAGCTACTTGTCTGCACTTTCAGCTTCTCCAAGAGACCCT
rs7508025	chr19:17835223	CTCCTGGGGTGCAGCTGAGCTGCCATTTCTTTGTCCTGGGAGGGGTCTTCAGTGCAAACAA	CTCCTGGGGTGCAGCTGAGCTGCCATTTCTCTGTCCTGGGAGGGGTCTTCAGTGCAAACAA
rs6512230	chr19:17836630	CTTTACATATGCGGGGCAAAAGCTTGAGAAGAGTCATACATTTTCCCAGGATATCTTTCTT	CTTTACATATGCGGGGCAAAAGCTTGAGAAAAGTCATACATTTTCCCAGGATATCTTTCTT
rs734094	chr11:2279796	GCCCCTCCCCTTCCTGCCTGCCCTTCTTCCGGGGCACCCAGCAGCTCGGTCCTAGGGCGAT	GCCCCTCCCCTTCCTGCCTGCCCTTCTTCCAGGGCACCCAGCAGCTCGGTCCTAGGGCGAT
rs9851497	chr3:129695224	CGGCCTGGGTCACACCGACACACATGGCCATACAATCAGATGCAACTCGGCACTCGGGCTC	CGGCCTGGGTCACACCGACACACATGGCCACACAATCAGATGCAACTCGGCACTCGGGCTC
rs6789646	chr3:129698473	TGGGTGTGCCAGTGCATGGGCTAACGCCGATGCAACTGTGCGGGTGTGTCAAACAAGTGTA	TGGGTGTGCCAGTGCATGGGCTAACGCCGACGCAACTGTGCGGGTGTGTCAAACAAGTGTA
rs7629791	chr3:129701108	CAGGCTTTGCAAATTGGCAGCCCAAGTCTCGGGGGCCTGTGCAGTGACTGATCATTACCAA	CAGGCTTTGCAAATTGGCAGCCCAAGTCTCAGGGGCCTGTGCAGTGACTGATCATTACCAA
rs755605	chr15:57769711	AGAAGCACTGCTGTAAAGCTTTTCACACTCAAATATTACCAAACTCTAAGGTCGCTTCTGA	AGAAGCACTGCTGTAAAGCTTTTCACACTCCAATATTACCAAACTCTAAGGTCGCTTCTGA
rs12910451	chr15:57770479	GGCTCAGCATCAAGTATTTGGGTGATTCCATTGGGGTACGATCAGGCCTGAGGGGAACAGA	GGCTCAGCATCAAGTATTTGGGTGATTCCACTGGGGTACGATCAGGCCTGAGGGGAACAGA
rs2462127	chr2:73960481	CAGTGTAGTTTTGAATCTCCTCAAATCCTCTCATGGAAATAGATCAAACCAAACAAAAAAC	CAGTGTAGTTTTGAATCTCCTCAAATCCTCCCATGGAAATAGATCAAACCAAACAAAAAAC
rs10203740	chr2:73963015	GGGTAATTCCAACTCCAGCTGAAAAGGAACATATATGCATGCATTCATAATGCACAAACTT	GGGTAATTCCAACTCCAGCTGAAAAGGAACGTATATGCATGCATTCATAATGCACAAACTT
rs10193032	chr2:73963267	CCAAGCAATGTTCAAGATAGGCTGTTTTAGTGTCTCAATGCATGGAGCTCACCTAGCCTCC	CCAAGCAATGTTCAAGATAGGCTGTTTTAGCGTCTCAATGCATGGAGCTCACCTAGCCTCC
rs886238	chr17:37469504	ACCGAAACCACCAACTGTTGCCTCGGCCTCGGTTGCCAAGACAGCAGGGGGCATCTGGAGC	ACCGAAACCACCAACTGTTGCCTCGGCCTCTGTTGCCAAGACAGCAGGGGGCATCTGGAGC
rs1076188	chr17:37472959	GCCGCCCAGCCACAACATCCAAACCCTAGCAGCAGGGTTTGGACCATCAAATCACCAAGCA	GCCGCCCAGCCACAACATCCAAACCCTAGCCGCAGGGTTTGGACCATCAAATCACCAAGCA
rs4796768	chr17:37477644	AGGGTGGGGGAGCAGGAGTACTTTTTGCACCCCCCAAAAGATAATTGTTGCTCTTCCCTCC	AGGGTGGGGGAGCAGGAGTACTTTTTGCACTCCCCAAAAGATAATTGTTGCTCTTCCCTCC
rs741037	chr7:44006073	GTTAGGAGGCAACAGGCTGAGGGACAGGGACCAGCAGACGGGGAGGGAGGGGCTGAAGCAG	GTTAGGAGGCAACAGGCTGAGGGACAGGGATCAGCAGACGGGGAGGGAGGGGCTGAAGCAG
rs741036	chr7:44007953	TCTGCTGTACAGCAAGGGCTGGCACCTTATGTGAGCTAGGCAAGGCTGCAAAGGCGGGTGG	TCTGCTGTACAGCAAGGGCTGGCACCTTATATGAGCTAGGCAAGGCTGCAAAGGCGGGTGG
rs758983	chr7:44008776	AAAATATTCTTTCCATAGGAATGTTGTTGGAAATAATAAAACATTATATTACAAGCTCTAG	AAAATATTCTTTCCATAGGAATGTTGTTGGGAATAATAAAACATTATATTACAAGCTCTAG
rs4607517	chr7:44008908	TGTGTCAGTGCTGGGACTGAATCCAAGTTGGGTGACAGCTGGGGCGATGCAGCAGAAGGCA	TGTGTCAGTGCTGGGACTGAATCCAAGTTGAGTGACAGCTGGGGCGATGCAGCAGAAGGCA
rs1004558	chr7:44013647	GGCGCGCGGCGGGATACCGTACTGTCTTGTGCTGGGTGGTGCTGGGCCTCCCACAGCGGCC	GGCGCGCGGCGGGATACCGTACTGTCTTGTACTGGGTGGTGCTGGGCCTCCCACAGCGGCC
rs9370880	chr6:16343556	TGCACTGTGACCAAGTGGAATTTATCCCACATAATTTTGGAGGTTATCTTCCCATGTAATT	TGCACTGTGACCAAGTGGAATTTATCCCACGTAATTTTGGAGGTTATCTTCCCATGTAATT
rs5763655	chr22:19119038	GGCTCAGGTGAGATGTTGCCAGCCAGCATGTTGTCAGGACGCACTGGAGAGTGGTGGGGCA	GGCTCAGGTGAGATGTTGCCAGCCAGCATGGTGTCAGGACGCACTGGAGAGTGGTGGGGCA
rs1153427	chr22:19120311	TCTGACCCCAGAAGCCACGCTTCCTGGGGACGCAGCTTGGGTGCACTGTGGAAAGGAACTG	TCTGACCCCAGAAGCCACGCTTCCTGGGGATGCAGCTTGGGTGCACTGTGGAAAGGAACTG
rs7359598	chr17:38150996	TTTATTTATGTCTGATCTCCCTATTTCTGTTCATAGTTTTCTAGTCACTTAGAATCAAAAT	TTTATTTATGTCTGATCTCCCTATTTCTGTCCATAGTTTTCTAGTCACTTAGAATCAAAAT
rs752313	chr17:38155350	GGTGAAGGCAGCTCCAAAGCAGTTGAGATCTGGACATTACAGAGCCTGGAAACAGGGCTCA	GGTGAAGGCAGCTCCAAAGCAGTTGAGATCCGGACATTACAGAGCCTGGAAACAGGGCTCA
rs9905939	chr17:38158909	CAGCTTTGGAGACATTCTACTAGTGACATATGCCCCTTCCCCAAAAAACAACAATGAAGTG	CAGCTTTGGAGACATTCTACTAGTGACATACGCCCCTTCCCCAAAAAACAACAATGAAGTG
rs1477143	chr17:50690827	TAGAATGTAGCTGCCCCTGGTGAGAGAAAATGGTGAGAAGAAAAAAGGATGTGTGTTTGGA	TAGAATGTAGCTGCCCCTGGTGAGAGAAAAGGGTGAGAAGAAAAAAGGATGTGTGTTTGGA
rs945387	chr9:136969829	TCCTCTGCATACCCCCCTACCACGTCGCCTCCGAACTTGGATGGCCAGGATGGGGTCCCGC	TCCTCTGCATACCCCCCTACCACGTCGCCTTCGAACTTGGATGGCCAGGATGGGGTCCCGC
rs4546744	chr9:136970358	GCGTGAACATGCACAACCTACTGATCCACCTGGTGCGGCGGCGCGGGCAGAAGCTGGAGAG	GCGTGAACATGCACAACCTACTGATCCACCGGGTGCGGCGGCGCGGGCAGAAGCTGGAGAG
rs4796605	chr17:37145382	GTTGCAGTGAACCGAAATTGTGCCAATGCACTCCAGCTGGGGCTACAGAGCGAGCCTACCC	GTTGCAGTGAACCGAAATTGTGCCAATGCATTCCAGCTGGGGCTACAGAGCGAGCCTACCC
rs4502275	chr17:37150369	AATTTGTGGGATTGGGGATAGAGACAGAGGAATAAATACACATTCACTGAGACCTGACTAG	AATTTGTGGGATTGGGGATAGAGACAGAGGGATAAATACACATTCACTGAGACCTGACTAG
rs6503659	chr17:37150790	AGGATGGAGATAAAGGAAGGACAAATACCAAGTGCCTTTTGCAGACGCTATGTCCGCTCTT	AGGATGGAGATAAAGGAAGGACAAATACCATGTGCCTTTTGCAGACGCTATGTCCGCTCTT
rs787824	chr12:119387358	TTAGTAGGGCAGCCAGGACACCAGTGAGGAGGTTATTGATTGTTGCCTCTTTGCTTCAGGC	TTAGTAGGGCAGCCAGGACACCAGTGAGGAAGTTATTGATTGTTGCCTCTTTGCTTCAGGC
rs787821	chr12:119388291	TGGGCGCCATAGTGAAGGTTATGGGATAAGTCTGTGCCTGGGCAAACCTAGATAACGGACA	TGGGCGCCATAGTGAAGGTTATGGGATAAGCCTGTGCCTGGGCAAACCTAGATAACGGACA
rs787820	chr12:119389039	CAGACACAGTTCCTATCCTTTTGGAGTTTAGATTTTATGTGTGGAGACAGACATTGAACAG	CAGACACAGTTCCTATCCTTTTGGAGTTTACATTTTATGTGTGGAGACAGACATTGAACAG
rs16912256	chr9:122670980	GAAAGAAAGAAAAGAAAAATGTATTCACTTCCCTTCGAAGTTTCCGAAGCCATTCAAAGTG	GAAAGAAAGAAAAGAAAAATGTATTCACTTTCCTTCGAAGTTTCCGAAGCCATTCAAAGTG
rs7390359	chr9:122672429	GGCAGTTCATACTGCTATAAAGAACTGCCCGACACTGGTTTATTTATTTATTTATTTATTT	GGCAGTTCATACTGCTATAAAGAACTGCCCAACACTGGTTTATTTATTTATTTATTTATTT
rs11983997	chr7:72383895	TTTTCTCCCAAGAACAGCAGGAGAAGCCTTGCCAGAGCACATAGCGTTTGAGTTAATTGAG	TTTTCTCCCAAGAACAGCAGGAGAAGCCTTCCCAGAGCACATAGCGTTTGAGTTAATTGAG
rs6560653	chr9:137169840	AGGAAGCAGCCCTGCCCAAGCCTAGGTGCTATGTCTGACCTCCAGACTGCTAGGCAGTGAG	AGGAAGCAGCCCTGCCCAAGCCTAGGTGCTGTGTCTGACCTCCAGACTGCTAGGCAGTGAG
rs254672	chr5:157178793	ATTCAGTTTTTTGGCAAGTCACACTTAAATGCATAATTGTTCCTTTAAAATTTGACCCAAA	ATTCAGTTTTTTGGCAAGTCACACTTAAATCCATAATTGTTCCTTTAAAATTTGACCCAAA
rs3777061	chr5:157178827	TAAGTGTGACTTGCCAAAAAACTGAATCAATCTGGCTTTCAGATTTAAATTCAGAACACTG	TAAGTGTGACTTGCCAAAAAACTGAATCAACCTGGCTTTCAGATTTAAATTCAGAACACTG
rs3777062	chr5:157179060	GGAATACATTTTCGTTAAAATCCAGTAATGCTTCTATTGCAACAGTTTTATGTATAAATGT	GGAATACATTTTCGTTAAAATCCAGTAATGGTTCTATTGCAACAGTTTTATGTATAAATGT
rs1145586	chr5:157180442	TATCACAGACGCTAGAGGGGGCACTCTCAACGGTTTCTTAAACACACACACAACAATCCAG	TATCACAGACGCTAGAGGGGGCACTCTCAATGGTTTCTTAAACACACACACAACAATCCAG
rs1145587	chr5:157181008	ATAATGGAGGGAAAGTAAAAGAAGAAAAATAACTTTAAGAAATGCTGCTGTTTCACAAGAG	ATAATGGAGGGAAAGTAAAAGAAGAAAAATGACTTTAAGAAATGCTGCTGTTTCACAAGAG
rs1145588	chr5:157181267	GAAGAGTAGGTTTCTCTGTCCTGATAAAGATAGGTAATTACTAGGATCACACTGTTTAAAT	GAAGAGTAGGTTTCTCTGTCCTGATAAAGACAGGTAATTACTAGGATCACACTGTTTAAAT
rs1145589	chr5:157182840	AACTTAGTTCCAAGCAACAGTTTTAAATAATGTTTTTCTTTATATTAATACTCTCCTGTAT	AACTTAGTTCCAAGCAACAGTTTTAAATAACGTTTTTCTTTATATTAATACTCTCCTGTAT
rs1145590	chr5:157183042	ATCTGTACTTCCAATATCTTGTTTTATCAGGTTAATAAGTGCAGCAAACAGTAACTAAAAT	ATCTGTACTTCCAATATCTTGTTTTATCAGATTAATAAGTGCAGCAAACAGTAACTAAAAT
rs1187146	chr5:157184212	GCTATAGTAAACATGTTATAAAATAGCCATGCTGTTAAAGCAATAATAAACCATAGTACTC	GCTATAGTAAACATGTTATAAAATAGCCATACTGTTAAAGCAATAATAAACCATAGTACTC
rs3097835	chr5:157184238	CCATGCTGTTAAAGCAATAATAAACCATAGTACTCCCTCCATATTGCAAGAATTCCAATAA	CCATGCTGTTAAAGCAATAATAAACCATAGGACTCCCTCCATATTGCAAGAATTCCAATAA
rs254675	chr5:157184419	ACCAGATTATATTCTATGATTTTAGTACAGTGTGACATAATAGAAAATGGGCTTTGGAATT	ACCAGATTATATTCTATGATTTTAGTACAGCGTGACATAATAGAAAATGGGCTTTGGAATT
rs1145594	chr5:157185981	TAGATTTGACTGTGTCATCAATCCAAGCTATTGCCAAAGTTGATGTGTTCCTCTCTAAATA	TAGATTTGACTGTGTCATCAATCCAAGCTACTGCCAAAGTTGATGTGTTCCTCTCTAAATA
rs254676	chr5:157186224	CAGGAAATTTATAATTTTGTTATGATCTCACATGCATGTATGGAAACATGTCACTTGGCTA	CAGGAAATTTATAATTTTGTTATGATCTCAAATGCATGTATGGAAACATGTCACTTGGCTA
rs2335407	chr1:151656420	TGGATAAACTCACCTACCATTGACTGAGTGCCTACGCCTCGTGTTCAGGGTCCTCTCTGTT	TGGATAAACTCACCTACCATTGACTGAGTGTCTACGCCTCGTGTTCAGGGTCCTCTCTGTT
rs883718	chr1:151659347	ACTTGCCCAGAGTTACTAATTAGTAACTAGCCATAAAGCTGGAATCAAACCCAGGCCTGTC	ACTTGCCCAGAGTTACTAATTAGTAACTAGTCATAAAGCTGGAATCAAACCCAGGCCTGTC
rs10796934	chr1:151662552	TTCCAACACGCCAGGGAGTAAAGTTAGTATGCCCATTCTATAGATGAAGAAACTGAGTCAA	TTCCAACACGCCAGGGAGTAAAGTTAGTATCCCCATTCTATAGATGAAGAAACTGAGTCAA
rs12069356	chr1:151662844	CTCCATGGAGATCTGTCTGGACAAAGGTTGGTGATTCTGCTTCTAAAACTCTGCAGAGGCC	CTCCATGGAGATCTGTCTGGACAAAGGTTGATGATTCTGCTTCTAAAACTCTGCAGAGGCC
rs6683557	chr1:151665380	TGGATTCCTGGCCACTCTGCTGCCTTGAGGCAGAAGCACCCTGGCTCCCCACTGCCACACA	TGGATTCCTGGCCACTCTGCTGCCTTGAGGGAGAAGCACCCTGGCTCCCCACTGCCACACA
rs4351182	chr5:88242384	CCCTGTGTACAGCCCCCTTCTTCTCTTTAAAGATGTATGTATTACTGAGGTTTTAAGTCAT	CCCTGTGTACAGCCCCCTTCTTCTCTTTAACGATGTATGTATTACTGAGGTTTTAAGTCAT
rs10075941	chr5:88242645	AAAGGCCTATTTCCAGCCGTAGGAAGGTGCCAGGTACTGTTCCCCGTATAATTATTTCCGA	AAAGGCCTATTTCCAGCCGTAGGAAGGTGCTAGGTACTGTTCCCCGTATAATTATTTCCGA
rs7792246	chr7:35604160	AGCCAAGGCTTTCATTTGTCTGTCATGGAGATGCTAAAAACAGAGAAGTCTCTGCCAGATT	AGCCAAGGCTTTCATTTGTCTGTCATGGAGCTGCTAAAAACAGAGAAGTCTCTGCCAGATT
rs3930640	chr7:35604688	TATTTTGAAATAATGAACAATTAAATGATCACTTTTATCAGAAACAAAAATTTCAGAAGAG	TATTTTGAAATAATGAACAATTAAATGATCGCTTTTATCAGAAACAAAAATTTCAGAAGAG
rs10251609	chr7:35607885	TTACTGTTATGTTCTGAGTTGGCCCTCAAATAGAACCTTCATATAGACCTAATACCATTCT	TTACTGTTATGTTCTGAGTTGGCCCTCAAACAGAACCTTCATATAGACCTAATACCATTCT
rs4974074	chr3:41206788	GCATTCCTCTTACCTTTCCACATGGCCCCATTCCCAAAGGGAACCAAAACTGCAGCTAGCC	GCATTCCTCTTACCTTTCCACATGGCCCCAATCCCAAAGGGAACCAAAACTGCAGCTAGCC
rs9872276	chr3:41206972	TGTTTTGCAACCCAGTAACCATAGAACTTACTTGTGACAAAATATGAGAAAGTCACTCAGA	TGTTTTGCAACCCAGTAACCATAGAACTTATTTGTGACAAAATATGAGAAAGTCACTCAGA
rs9859392	chr3:41209520	TTTTATAATTAAAGAACTATATGATTTCAGCAAGTTCCATTTGGTAGAATGACACAGTCAG	TTTTATAATTAAAGAACTATATGATTTCAGGAAGTTCCATTTGGTAGAATGACACAGTCAG
rs9870255	chr3:41211585	ATTCTGTCTTTGGTTTGTTCATGCTTTTCAGTCTGCACAGCAGGGATGTTCTTAAGAAGTT	ATTCTGTCTTTGGTTTGTTCATGCTTTTCACTCTGCACAGCAGGGATGTTCTTAAGAAGTT
rs3800311	chr6:27318564	TGAGGTTCTGGAGAAGAAGGCAACAGCTTCATAGCAAAAGGGAGTGACTAAGAAAGTGGCC	TGAGGTTCTGGAGAAGAAGGCAACAGCTTCGTAGCAAAAGGGAGTGACTAAGAAAGTGGCC
rs3800312	chr6:27318593	CATAGCAAAAGGGAGTGACTAAGAAAGTGGCCCCAAGAAGAGGGCAGGAGATCTCTGAAAA	CATAGCAAAAGGGAGTGACTAAGAAAGTGGACCCAAGAAGAGGGCAGGAGATCTCTGAAAA
rs3800313	chr6:27318743	TTTCTCTGTGTAGCGCCAGGAAGTCCAGACTGTTGAGACAGAGTGAAGGGCTGAGAGGAAA	TTTCTCTGTGTAGCGCCAGGAAGTCCAGACGGTTGAGACAGAGTGAAGGGCTGAGAGGAAA
rs11964043	chr6:27321140	CCCAACTTTAAATTCACTTATGTATTAAGGTTTTAAAAGACCCTTACGGCAACATATCAGT	CCCAACTTTAAATTCACTTATGTATTAAGGCTTTAAAAGACCCTTACGGCAACATATCAGT
rs5030957	chr6:27321986	TTACTTCCTGGGGAATGGTTTGGGAGAGAAGTGCAATAAAATGTCATCACTATCAGGGAGT	TTACTTCCTGGGGAATGGTTTGGGAGAGAAATGCAATAAAATGTCATCACTATCAGGGAGT
rs17753394	chr22:37002887	CCTGGGCAGCCTGTTTGTGAAATGAACCCGTGAACCTATGCCAGCCCCCGCTTGGTGGAAA	CCTGGGCAGCCTGTTTGTGAAATGAACCCGGGAACCTATGCCAGCCCCCGCTTGGTGGAAA
rs7649848	chr3:40316715	GAGCTAATGCCCTAATCATGACCTAATCATCCTCATGACCTAATCATCCCTTGAAAGTCCC	GAGCTAATGCCCTAATCATGACCTAATCATACTCATGACCTAATCATCCCTTGAAAGTCCC
rs9826847	chr3:40320316	TCTCAAGTGTCAGTGGTGAAGGAAAGAAAAATACCACGATTGTAGGTCAAGCTTATGACTG	TCTCAAGTGTCAGTGGTGAAGGAAAGAAAATTACCACGATTGTAGGTCAAGCTTATGACTG
rs9868700	chr3:40320412	GGAACATAAAGCCAAAGATTGGAGGCCTCTGAAGCCAAATCCGTCCCCTAACCCCAACTTA	GGAACATAAAGCCAAAGATTGGAGGCCTCTAAAGCCAAATCCGTCCCCTAACCCCAACTTA
rs7652439	chr3:40324952	GAAATTATAGTATTAGACCTAATCTTGCTAGATCTTATTAGTGTATTAATAAAGAAATACA	GAAATTATAGTATTAGACCTAATCTTGCTATATCTTATTAGTGTATTAATAAAGAAATACA
rs7644643	chr3:40325213	ACAATTGAACACACCTGCCTGAGTGAGCCAATTCCCAAAGTCTCGGGTTTATTTTTCTGTG	ACAATTGAACACACCTGCCTGAGTGAGCCAGTTCCCAAAGTCTCGGGTTTATTTTTCTGTG
rs2278928	chr3:40325787	CAATGAGTTGAAAGCCGGAGCAAGGGGACTTGTTTTGTTCCTGCACCCCGATTTTACTTAC	CAATGAGTTGAAAGCCGGAGCAAGGGGACTCGTTTTGTTCCTGCACCCCGATTTTACTTAC
rs2278930	chr3:40326096	TCGGCCGCCCCCGGCCTCAGGCTTTCCGGGCTCTGCTGCCTCCAGAAAACTACAAGTCCCA	TCGGCCGCCCCCGGCCTCAGGCTTTCCGGGTTCTGCTGCCTCCAGAAAACTACAAGTCCCA
rs13215983	chr6:43032171	TTCTAACTTCAGGTTTCTGATTCCTCTTGGCCGTTATATCAGCAAGAGATGCACCAGTAAT	TTCTAACTTCAGGTTTCTGATTCCTCTTGGTCGTTATATCAGCAAGAGATGCACCAGTAAT
rs11752813	chr6:43035995	GGGCTCCGCCCCTGGATTCGGTGGACAGACCAGCTTTACCTCCAGAGACTCCCCCTGTCTT	GGGCTCCGCCCCTGGATTCGGTGGACAGACGAGCTTTACCTCCAGAGACTCCCCCTGTCTT
rs680789	chr10:11237680	CATGGGAGCTAATTATGTCATATTAATGACGGTAGTTGTTTAGAGAGAAAACAGAATCCAC	CATGGGAGCTAATTATGTCATATTAATGACAGTAGTTGTTTAGAGAGAAAACAGAATCCAC
rs679944	chr10:11237851	TTTTGGGCTACCTTTCTCAGTCGTAAATGATGTGTAATCAAGGAATACAACTGAAATGAAA	TTTTGGGCTACCTTTCTCAGTCGTAAATGACGTGTAATCAAGGAATACAACTGAAATGAAA
rs591235	chr10:11238154	TTCAGGGACAAGTGGACCCAGCGGGCATTTGGAGAAAAATAGGCATGACTCAGTAACTGAC	TTCAGGGACAAGTGGACCCAGCGGGCATTTAGAGAAAAATAGGCATGACTCAGTAACTGAC
rs592033	chr10:11238261	CGGGATAACATGGCTCTTAATAGTGGCGACAGATCACATGACGTGTGATTTAATTTTACTG	CGGGATAACATGGCTCTTAATAGTGGCGACGGATCACATGACGTGTGATTTAATTTTACTG
rs593393	chr10:11238604	CGGTATCCCCAGCTCCTTGAATTTGTCAGACTCGCGTCATAAATATGATTAAGTGAATGAA	CGGTATCCCCAGCTCCTTGAATTTGTCAGAGTCGCGTCATAAATATGATTAAGTGAATGAA
rs593836	chr10:11238687	TGTCACACTTCCACCATGCACTTGATGGGGCTTCCGTGAATCGCTGTTTCTGAGGTTCCGC	TGTCACACTTCCACCATGCACTTGATGGGGGTTCCGTGAATCGCTGTTTCTGAGGTTCCGC
rs650371	chr10:11239820	GTAACTTCTGTTTTCACCACTGAAGATACTTTGCCTGGACTTATTTATGCAAGAGAACACG	GTAACTTCTGTTTTCACCACTGAAGATACTGTGCCTGGACTTATTTATGCAAGAGAACACG
rs7095683	chr10:11240643	CTTTGTGCCTTTTACTAGCAGTCACATTGAAATAAGGTAATAAGGTTTCCCTTTTCCAAAT	CTTTGTGCCTTTTACTAGCAGTCACATTGAGATAAGGTAATAAGGTTTCCCTTTTCCAAAT
rs653371	chr10:11241370	ATGGAAGACAGACGCGTTTTTCATGATGACTGTGAAGCAGTGCATTTTAAAAGGGAGTTGC	ATGGAAGACAGACGCGTTTTTCATGATGACCGTGAAGCAGTGCATTTTAAAAGGGAGTTGC
rs620521	chr10:11241950	TGGAGAGTAGCCTGGAGGCTCCGACAGGCCGCTGAGTGGCCGGTTAATTGGGGTGCTGCGA	TGGAGAGTAGCCTGGAGGCTCCGACAGGCCACTGAGTGGCCGGTTAATTGGGGTGCTGCGA
rs656006	chr10:11241968	CCGGCCACTCAGCGGCCTGTCGGAGCCTCCAGGCTACTCTCCATAGTGTCAGTGACACCTT	CCGGCCACTCAGCGGCCTGTCGGAGCCTCCGGGCTACTCTCCATAGTGTCAGTGACACCTT
rs666330	chr10:11245182	TCTGCGGAGCACATAATGTAACACAATGGAGAAGGGAGTGGCATTGTACTAGTTCTAGTGT	TCTGCGGAGCACATAATGTAACACAATGGAAAAGGGAGTGGCATTGTACTAGTTCTAGTGT
rs606139	chr10:11245725	ATAGGGGGATACGAAGAAGTAGAAATTGAAACCAGGACCTAGCGAAGAGTATTTGACATCA	ATAGGGGGATACGAAGAAGTAGAAATTGAAGCCAGGACCTAGCGAAGAGTATTTGACATCA
rs619030	chr10:11246287	GACATGTCTTTTTCACTTGCCCCCACCCTCCTTTGAGCAGGAATAAACAGTAAAGCAAAAC	GACATGTCTTTTTCACTTGCCCCCACCCTCTTTTGAGCAGGAATAAACAGTAAAGCAAAAC
rs619129	chr10:11246354	ATCGTATTACTTGATGGTGACTAGAAGTGCGGGCTGTACACAGCATTCTCTTCCAAATGGG	ATCGTATTACTTGATGGTGACTAGAAGTGCAGGCTGTACACAGCATTCTCTTCCAAATGGG
rs16908333	chr11:10787253	CGCCCCTTACGCCACTGGCTCAGCCTCAGAGACTTCGCGAATATGGCTTTGCGCACTGCGG	CGCCCCTTACGCCACTGGCTCAGCCTCAGACACTTCGCGAATATGGCTTTGCGCACTGCGG
rs10500733	chr11:10789069	ACTTAAATAGAAAGATTTGAAGTTGAAATCGTACCTGCAAAGCCCATTGCAGAAGGGTTCA	ACTTAAATAGAAAGATTTGAAGTTGAAATCATACCTGCAAAGCCCATTGCAGAAGGGTTCA
rs1496292	chr11:10791724	GCCAAGGTTGAGATCAACTCATGTAGAAAATAGTGAAGCACTAAGATTCTTAAGCATGGTA	GCCAAGGTTGAGATCAACTCATGTAGAAAACAGTGAAGCACTAAGATTCTTAAGCATGGTA
rs16908350	chr11:10792454	TCCCTAATCTGGTTCTATGGTACTCAAATTTTGCTCCATTGTTAAGATATATTTTGGAGAT	TCCCTAATCTGGTTCTATGGTACTCAAATTCTGCTCCATTGTTAAGATATATTTTGGAGAT
rs2173004	chr11:10794206	TGGGTAGAGAATGTATTGGACAGCAAGAGATGAAGTTGAGGGATGAATTCTAGGAGGCTAT	TGGGTAGAGAATGTATTGGACAGCAAGAGACGAAGTTGAGGGATGAATTCTAGGAGGCTAT
rs1874446	chr11:10795319	CTCTACTTCCTCCAAATAGTTTGTAGTGAGCCTCAATTGAGATAATGTATATTCCTGTATT	CTCTACTTCCTCCAAATAGTTTGTAGTGAGACTCAATTGAGATAATGTATATTCCTGTATT
rs4912533	chr3:185496253	GATTGCATTAAAGTTAGATTTGGAACTCAGATGCCCTTAATCACTATCAGTTAGTCTTCCA	GATTGCATTAAAGTTAGATTTGGAACTCAGCTGCCCTTAATCACTATCAGTTAGTCTTCCA
rs2347341	chr7:6385634	AGGCTCTCCAACTTCCTGGGACCAGCAGAAAAAGAGGAGCTGGCAAAGAAAGCCAAGGGAG	AGGCTCTCCAACTTCCTGGGACCAGCAGAAGAAGAGGAGCTGGCAAAGAAAGCCAAGGGAG
rs1880119	chr7:6388680	CACATGTGGTCCCAGCTACTTAGGAAGCTGAGGTGGGAGGATTGTTTGAGCCCAGGAGGTC	CACATGTGGTCCCAGCTACTTAGGAAGCTGTGGTGGGAGGATTGTTTGAGCCCAGGAGGTC
rs4980037	chr10:80582440	CACTGTGGGCTGGTGCATGGGTTCTGGAGCCCAGAGGCTGTGCTGAGTACAGCTCTACCAC	CACTGTGGGCTGGTGCATGGGTTCTGGAGCGCAGAGGCTGTGCTGAGTACAGCTCTACCAC
rs6480922	chr10:80583788	CAGTGGTTTGTGTGTGCCACCGACAGTGCCTGTGCCCTTCAGTGCCACGACCTTCCTGTGC	CAGTGGTTTGTGTGTGCCACCGACAGTGCCCGTGCCCTTCAGTGCCACGACCTTCCTGTGC
rs6480923	chr10:80583800	TGTGCCACCGACAGTGCCTGTGCCCTTCAGTGCCACGACCTTCCTGTGCCAATCATGGGTA	TGTGCCACCGACAGTGCCTGTGCCCTTCAGCGCCACGACCTTCCTGTGCCAATCATGGGTA
rs10824723	chr10:80587292	CCCTTGTTGTCCATGGGGAGGTCCTTGCTCCGGCCAATGTCCAGCTCAATGTCCAGAGCAC	CCCTTGTTGTCCATGGGGAGGTCCTTGCTCTGGCCAATGTCCAGCTCAATGTCCAGAGCAC
rs703997	chr10:80587335	AAATCACCCCTCCAGCCATGCACCCACCAGAGGAGGCTCCAGGGTGCTCTGGACATTGAGC	AAATCACCCCTCCAGCCATGCACCCACCAGGGGAGGCTCCAGGGTGCTCTGGACATTGAGC
rs779933	chr10:80588523	GGACTGTCCTGGGACTAAGAGGGGTTCCCCCCATCATATCTACCTTCCCAGCCCCACCTCC	GGACTGTCCTGGGACTAAGAGGGGTTCCCCTCATCATATCTACCTTCCCAGCCCCACCTCC
rs16936932	chr10:80588846	CTGAGGGTGCCTGGGAGAGCTATCTGAGCATTGGGGTCCCTGCCTCATGGGGAGATTGGGT	CTGAGGGTGCCTGGGAGAGCTATCTGAGCACTGGGGTCCCTGCCTCATGGGGAGATTGGGT
rs749821	chr10:80589448	GAAGGAGTAGGAGGGCACTCTGTATTGAGTCCATATTGTGGATTGTGCCCTGGATATTTCC	GAAGGAGTAGGAGGGCACTCTGTATTGAGTACATATTGTGGATTGTGCCCTGGATATTTCC
rs697241	chr10:80591870	CTACCTCAGTGATCTGCAAACCACCAGTGTTCCACACGCCGGTCAGCAGCTTGCGGCCCCT	CTACCTCAGTGATCTGCAAACCACCAGTGTCCCACACGCCGGTCAGCAGCTTGCGGCCCCT
rs860903	chr1:172108806	GCAGGAGGGAAAAGATGAGAGACAAATGCTTATGGAGAAAAGAACATTGAATCTGACCCTA	GCAGGAGGGAAAAGATGAGAGACAAATGCTCATGGAGAAAAGAACATTGAATCTGACCCTA
rs4652086	chr1:172110202	ACAAGTGACAGGGAAATTAAGAGAGAAAAATGTTAGGTCCTACACTTTTAGGTCCAAAGTG	ACAAGTGACAGGGAAATTAAGAGAGAAAAACGTTAGGTCCTACACTTTTAGGTCCAAAGTG
rs6703830	chr1:172110219	TAAGAGAGAAAAATGTTAGGTCCTACACTTTTAGGTCCAAAGTGACAGCTACAAAATTACA	TAAGAGAGAAAAATGTTAGGTCCTACACTTCTAGGTCCAAAGTGACAGCTACAAAATTACA
rs12119177	chr1:172110351	GAGTTGGTCAACGGTGTGATTTTTGTAACTACCGAAATCTTATTCAAATGTAGGTTTTATT	GAGTTGGTCAACGGTGTGATTTTTGTAACTCCCGAAATCTTATTCAAATGTAGGTTTTATT
rs12024178	chr1:172110798	TTGTGTTTGTGTCAGGAAGTGGTAACTGCTATGGAGGGAGCAGGGGTGTTAACAGGGCAGG	TTGTGTTTGTGTCAGGAAGTGGTAACTGCTGTGGAGGGAGCAGGGGTGTTAACAGGGCAGG
rs1894596	chr1:172112780	GCCCCATTCTGATTGGTTGCAGCCCAAACCATAACAATCGCTAAATATCTTGACTCCTAAA	GCCCCATTCTGATTGGTTGCAGCCCAAACCGTAACAATCGCTAAATATCTTGACTCCTAAA
rs859468	chr1:172113583	AAGATAGAATGAATGGCATGAGGTGCTCCACTTTTCTCACTTTCTCTGAGCCCTGCTGAAG	AAGATAGAATGAATGGCATGAGGTGCTCCATTTTTCTCACTTTCTCTGAGCCCTGCTGAAG
rs859469	chr1:172113663	TTATTAAATGCCTGCTTAATCAATGTGCCTGTAGTGTTGCTAAGCTCATGTCACTTAATTA	TTATTAAATGCCTGCTTAATCAATGTGCCTCTAGTGTTGCTAAGCTCATGTCACTTAATTA
rs12027160	chr1:172115721	AAATGGGGTGGAAAATACCAACATGGGCCAGTGGGGCCTCAGGGCAAAAAAAAAAAAAGGT	AAATGGGGTGGAAAATACCAACATGGGCCACTGGGGCCTCAGGGCAAAAAAAAAAAAAGGT
rs6679400	chr1:172117300	CATTAATGTCTATTTTTCATCTGTGTTTCTTGAGCTTGGAGAACAGCATGTCACCATTCAC	CATTAATGTCTATTTTTCATCTGTGTTTCTGGAGCTTGGAGAACAGCATGTCACCATTCAC
rs4567413	chr11:47188760	CTTCAAATGTGTACCTACCTTGAAGTATTTTACTTGTTTCACATATATTTTTATTCAGTTC	CTTCAAATGTGTACCTACCTTGAAGTATTTCACTTGTTTCACATATATTTTTATTCAGTTC
rs2029298	chr11:47191294	CCTAACCTGTTGGGTGTCCACCTAGGAGCAGCCTGGGACGTGATGGGCCAGAGGGCGTGCA	CCTAACCTGTTGGGTGTCCACCTAGGAGCAACCTGGGACGTGATGGGCCAGAGGGCGTGCA
rs2908201	chr7:75571776	CTCATTTGGGAGCTCCTGGTTGACACCCCATGGGACAGCATCAGAAAGCCCCAGGTTTTTG	CTCATTTGGGAGCTCCTGGTTGACACCCCACGGGACAGCATCAGAAAGCCCCAGGTTTTTG
rs757626	chr7:75574173	CAGCGCAGCTGGCCCAGATCAGAACCTCCATGGCACAGTGCTGAGAGGGGCCAGGAGGAAG	CAGCGCAGCTGGCCCAGATCAGAACCTCCACGGCACAGTGCTGAGAGGGGCCAGGAGGAAG
rs2868371	chr7:75575410	TGAAGCCAGACTGCCTGAATTCACATCTTTGTTCCATCACTAAGCAGATGAACTTGTGCAA	TGAAGCCAGACTGCCTGAATTCACATCTTTCTTCCATCACTAAGCAGATGAACTTGTGCAA
rs1872779	chr5:179178355	CTTTCAAATGGGGCTGAAGTGGAAGGATTTGGGCTGCCCTCCCAGGCGATGCCCCGTGGGT	CTTTCAAATGGGGCTGAAGTGGAAGGATTTCGGCTGCCCTCCCAGGCGATGCCCCGTGGGT
rs2913883	chr5:151256850	ACTTAAAATCCTCCCCCTCCCTCACTGTGCTCTAGGCCAAAAGTTCCCAACTCTTTTCCAA	ACTTAAAATCCTCCCCCTCCCTCACTGTGCCCTAGGCCAAAAGTTCCCAACTCTTTTCCAA
rs2964608	chr5:151257082	CATGGTCTATAAGCAAATGCTTAAGTTAACCGGGAATTGTGGTACTAAAAGAGCTCCCCGA	CATGGTCTATAAGCAAATGCTTAAGTTAACTGGGAATTGTGGTACTAAAAGAGCTCCCCGA
rs1428155	chr5:151261826	TCCCCATAACTCTGGAATTATAACTGAGAATTTTGGAGCTCCGGGAATTGGAAAATATAGG	TCCCCATAACTCTGGAATTATAACTGAGAACTTTGGAGCTCCGGGAATTGGAAAATATAGG
rs7442819	chr5:178990679	GAAATAGGGAAGCTTTAGAAAACAATTTAATGTCTAATGAAGTATGGAATAAATTCTGGTA	GAAATAGGGAAGCTTTAGAAAACAATTTAAAGTCTAATGAAGTATGGAATAAATTCTGGTA
rs38416	chr7:30318503	TAAAACCTATATTGTTAACTTTTGAATGAACATAAGGGCATAGGAACATTGTCTATCCTTG	TAAAACCTATATTGTTAACTTTTGAATGAAAATAAGGGCATAGGAACATTGTCTATCCTTG
rs38417	chr7:30318518	TAACTTTTGAATGAACATAAGGGCATAGGAACATTGTCTATCCTTGACACCCAGCTATTAA	TAACTTTTGAATGAACATAAGGGCATAGGAGCATTGTCTATCCTTGACACCCAGCTATTAA
rs38429	chr7:30322841	TCATTTCAGGGAGCAAGTTGCTTTTCCTGGCAAATCATATTCTATTACACCATAAATTCTC	TCATTTCAGGGAGCAAGTTGCTTTTCCTGGAAAATCATATTCTATTACACCATAAATTCTC
rs38433	chr7:30326902	CCATCCTCATCTCACTCCTGGATTACTGCATCAATTCCTAGGGTGGTTTTTCTGACTGCTT	CCATCCTCATCTCACTCCTGGATTACTGCAACAATTCCTAGGGTGGTTTTTCTGACTGCTT
rs12221341	chr10:43177336	TCGCGTTCTCCCAGGTGCGGAACGAGCAAACGTTGATGACAAATGACTTTGCCTACCATCT	TCGCGTTCTCCCAGGTGCGGAACGAGCAAAGGTTGATGACAAATGACTTTGCCTACCATCT
rs4948722	chr10:43179404	CCCCCATCCCCACCCCGCAACAACTTCTGCCCTCTTCAGGGATCCACCATTCCTATTCCTA	CCCCCATCCCCACCCCGCAACAACTTCTGCACTCTTCAGGGATCCACCATTCCTATTCCTA
rs4648316	chr10:43179941	CAGCATGCCTGACTAATTTTTGTATTTTTAGTAGAGACAACAGGGTTTCATCATGTTGGCC	CAGCATGCCTGACTAATTTTTGTATTTTTAATAGAGACAACAGGGTTTCATCATGTTGGCC
rs4245604	chr10:43186534	CACCCCCACACAGAGGTCCCAGAACCCCCAAAGCTGGCACAAGAGCCCAGGAACACCCTGC	CACCCCCACACAGAGGTCCCAGAACCCCCACAGCTGGCACAAGAGCCCAGGAACACCCTGC
rs17261915	chr1:26440998	GCAAGGAAACAGGGAAACTGGTTTAAATCCTCAAGCCTGACATTATAAGAGTAAGGGTAAG	GCAAGGAAACAGGGAAACTGGTTTAAATCCCCAAGCCTGACATTATAAGAGTAAGGGTAAG
rs3811462	chr1:26442744	GGGAGGCTGGGCTCCAGGCCACGTGCTGGGAGACCAGCTGGGGAAGACAGGGTTGAGCCCA	GGGAGGCTGGGCTCCAGGCCACGTGCTGGGGGACCAGCTGGGGAAGACAGGGTTGAGCCCA
rs419728	chr19:13710946	AAAAGGTTAAAGACAATGGAGGGCTATATGTATTTGAGTGCAACTGATTTATATAAATAAC	AAAAGGTTAAAGACAATGGAGGGCTATATGCATTTGAGTGCAACTGATTTATATAAATAAC
rs418005	chr19:13714712	GGGGGGTGTGCTGTAGGGAGGCATGCTCGCTGATCCCCAGGAATGAGAGGGAACTGCATTT	GGGGGGTGTGCTGTAGGGAGGCATGCTCGCGGATCCCCAGGAATGAGAGGGAACTGCATTT
rs389535	chr19:13716863	GGTCTCATGGTCTTTTAAGTCAAATGCATACAACCCAAAACAGTATAGCTCAGAGGACAAG	GGTCTCATGGTCTTTTAAGTCAAATGCATATAACCCAAAACAGTATAGCTCAGAGGACAAG
rs324013	chr12:55796928	GAAGGTTAATAACAACAGAGAGGGAGACGACACAGTTGAAGAGCAGAGGTGAAGCATTGTG	GAAGGTTAATAACAACAGAGAGGGAGACGATACAGTTGAAGAGCAGAGGTGAAGCATTGTG
rs715490	chr22:28322128	TCTCCCACCTGCGGGGAAGAAATGAAGCAATGATAATGAAGACACTCCCATGCCAAGCCCA	TCTCCCACCTGCGGGGAAGAAATGAAGCAACGATAATGAAGACACTCCCATGCCAAGCCCA
rs818051	chr9:130999732	GAGAATAGATCAGCACATGCACCAGGCATGATCAGACTGCGTGAGTCACAACATGTCAGGC	GAGAATAGATCAGCACATGCACCAGGCATGGTCAGACTGCGTGAGTCACAACATGTCAGGC
rs2527344	chr22:28436178	GCCAGGGACAGGATCTCTGTGATTTCCTAACGGGGACATCCCCAGGCTCCTCTTACCCCTA	GCCAGGGACAGGATCTCTGTGATTTCCTAATGGGGACATCCCCAGGCTCCTCTTACCCCTA
rs737932	chr22:28436918	AACAAATTCAAGGGCCTGTCCCCTTCACTCTGTTTCCCTCACATGGACTCTGTTCCCTGTT	AACAAATTCAAGGGCCTGTCCCCTTCACTCCGTTTCCCTCACATGGACTCTGTTCCCTGTT
rs4971010	chr1:147328094	TGGCAGCATCATTTTTTCCCCCAATTCCTGACACAGAGGCTGAGCCATTATTGTCAACCTA	TGGCAGCATCATTTTTTCCCCCAATTCCTGGCACAGAGGCTGAGCCATTATTGTCAACCTA
rs6663989	chr1:147334099	GTTTGGGGTGCATTCTTCCATGTATAAATGCATAAAGAGACATATCCAAGCCCATCATATA	GTTTGGGGTGCATTCTTCCATGTATAAATGGATAAAGAGACATATCCAAGCCCATCATATA
rs1040008	chr1:147334377	CCACTGCCCAACACGGGAGAGGCAGGAGTGACTGAGTTTGCAGGGGAGGCTGCGTGGAGGG	CCACTGCCCAACACGGGAGAGGCAGGAGTGGCTGAGTTTGCAGGGGAGGCTGCGTGGAGGG
rs10908598	chr1:154631623	CATATTTAATTTTCTTAAGTAAAGTTTTTAGTGTACTGTGTACTTTCTTCTACCTTCCCCT	CATATTTAATTTTCTTAAGTAAAGTTTTTAATGTACTGTGTACTTTCTTCTACCTTCCCCT
rs11802928	chr1:154633790	ACGGTCTTCTCATCATTTCTGGGCACCTGCCGCAGCCCTGGAAGTCCTGCATTTTTGATGT	ACGGTCTTCTCATCATTTCTGGGCACCTGCTGCAGCCCTGGAAGTCCTGCATTTTTGATGT
rs1555025	chr1:23632241	CTGTGTAGAAAACAGTGGTAATTTCATTGCTCTATTGTCTGTCCCTTTCTGCTATGGAAGG	CTGTGTAGAAAACAGTGGTAATTTCATTGCGCTATTGTCTGTCCCTTTCTGCTATGGAAGG
rs4649097	chr1:23633186	AATAATGGCTGTAGGAACTCCTGAATAACCGAAGAGAAGATCCTTCTTTTCCTATCTTGCA	AATAATGGCTGTAGGAACTCCTGAATAACCAAAGAGAAGATCCTTCTTTTCCTATCTTGCA
rs909535	chr1:23636043	ATAAGTGGCAGGTCCAAGATTTGCACCCAGGTCTGCCTGTCTCCCAAAGCCTGTATCCTCC	ATAAGTGGCAGGTCCAAGATTTGCACCCAGATCTGCCTGTCTCCCAAAGCCTGTATCCTCC
rs7518539	chr1:23639539	CTCAGTTTCTGAGTGTATTCCTACCTGAGAATATGCTGTCCACCCTTGTCTGAGTGTGGGG	CTCAGTTTCTGAGTGTATTCCTACCTGAGATTATGCTGTCCACCCTTGTCTGAGTGTGGGG
rs871961	chr3:150061216	AGAAGCCTCCCTCAGAAACTGCTGTAACCTGAGAAATAAGTCACAGTTAGCTAGACAAAGG	AGAAGCCTCCCTCAGAAACTGCTGTAACCTAAGAAATAAGTCACAGTTAGCTAGACAAAGG
rs871962	chr3:150061313	ATAAGAAGAAAGCCAGTGAGGGTGAAATTTGGAGAGCTGAGGAAAGAGGAGCATGTGTACA	ATAAGAAGAAAGCCAGTGAGGGTGAAATTTAGAGAGCTGAGGAAAGAGGAGCATGTGTACA
rs9826662	chr3:150061426	AGGACTGGGGACACTGGTCTAAGAACAATGAAAATCCATTGAAGATATTAAGTCATCAATG	AGGACTGGGGACACTGGTCTAAGAACAATGCAAATCCATTGAAGATATTAAGTCATCAATG
rs1356258	chr3:150062384	GAAATTAGGAATAATATATGTGGACTGCTTTTTTAAAATTCCAAGGAATTTTTAAGGGTAA	GAAATTAGGAATAATATATGTGGACTGCTTGTTTAAAATTCCAAGGAATTTTTAAGGGTAA
rs1400268	chr3:150063577	TTAACAAAGTCTTATCCTGAGAAATACCAAAGTCCTCAAAGCACTCACCTAGATTCCCCAA	TTAACAAAGTCTTATCCTGAGAAATACCAAGGTCCTCAAAGCACTCACCTAGATTCCCCAA
rs2627907	chr17:55573663	CTGCTTTCTCGCGGGAAACGCTCCCCTACATATGCTCGCTCACAGCCCACCGCCCCGCGCC	CTGCTTTCTCGCGGGAAACGCTCCCCTACAGATGCTCGCTCACAGCCCACCGCCCCGCGCC
rs923038	chr17:55574914	GAGTGGCTAGGACAGGGTCTTCAGGGAAACTGCTGCCTTATTCTCAACTGCTTGTCTCAGT	GAGTGGCTAGGACAGGGTCTTCAGGGAAACGGCTGCCTTATTCTCAACTGCTTGTCTCAGT
rs345194	chr17:55578212	CTATAAAATTAAGATCTTGATATCTATCCCGCACCAAAGGAAAGATCAGTCCAACCTTCCA	CTATAAAATTAAGATCTTGATATCTATCCCCCACCAAAGGAAAGATCAGTCCAACCTTCCA
rs345193	chr17:55579350	GGGTGGGATGGAACATTGAGTTAGCACTGGAGAGGGGCCCTGGCACATCCAGGCTCTTCCT	GGGTGGGATGGAACATTGAGTTAGCACTGGCGAGGGGCCCTGGCACATCCAGGCTCTTCCT
rs345192	chr17:55581041	AACCAGAAAAAGGGGGCTTCCTGTTGATGGATTGATGGAGGAGGTCCAGGTCCACTGCCTG	AACCAGAAAAAGGGGGCTTCCTGTTGATGGGTTGATGGAGGAGGTCCAGGTCCACTGCCTG
rs4233460	chr1:26317529	GGGAGGAAGGAGCCTGGGATTAGGTTAATGAAACTGCTGGCAGCCTCACATTCAGGACCTG	GGGAGGAAGGAGCCTGGGATTAGGTTAATGGAACTGCTGGCAGCCTCACATTCAGGACCTG
rs17184982	chr1:26318121	AGCACTTTTTCAAAAACGTTTCCTGCTGTTAATCATCATCATCATCTCTTCACCCTTTCAG	AGCACTTTTTCAAAAACGTTTCCTGCTGTTCATCATCATCATCATCTCTTCACCCTTTCAG
rs6598957	chr1:26319042	AAACCCAGAACGGTCAGCCTCAAGAGTCCACGCTCTTCCTAGAAACTTTCACTCTGGTAAA	AAACCCAGAACGGTCAGCCTCAAGAGTCCATGCTCTTCCTAGAAACTTTCACTCTGGTAAA
rs12726972	chr1:26323776	CTGTCTCAGTGAGGATGAAAAATTCAAGGCGGATCACACTGTGACGTGTGCTATAACTCTC	CTGTCTCAGTGAGGATGAAAAATTCAAGGCAGATCACACTGTGACGTGTGCTATAACTCTC
rs11812567	chr10:60218282	AAAAATATAATAATTTATCATTTTATAACCGAATCATGTTCAATCAGTAGGAAATAGTGGC	AAAAATATAATAATTTATCATTTTATAACCAAATCATGTTCAATCAGTAGGAAATAGTGGC
rs4910171	chr11:10675539	AGAATGCTGCCAGCTCTGCGATCACTTGCTCGGTTGACTTCACTGGGTGTTTTGACTTCCC	AGAATGCTGCCAGCTCTGCGATCACTTGCTGGGTTGACTTCACTGGGTGTTTTGACTTCCC
rs17420224	chr11:10677970	CAACACCAGCCCATGAAAGCAACTGGGAGCAGGGCTGTACCCTGCGAAGCCACAGAGGTGG	CAACACCAGCCCATGAAAGCAACTGGGAGCGGGGCTGTACCCTGCGAAGCCACAGAGGTGG
rs2101762	chr1:84247553	TAATAAATCAATCGATCAGGTAAATGTAATGGAATAAACAAATGCCTGTAAACAAACATGT	TAATAAATCAATCGATCAGGTAAATGTAATAGAATAAACAAATGCCTGTAAACAAACATGT
rs953197	chr1:84253307	CTACATGTTCTCAGATTAGCAAAAATATTATATGGAAGGGGACTCAAAATCTTTTCTCTGA	CTACATGTTCTCAGATTAGCAAAAATATTACATGGAAGGGGACTCAAAATCTTTTCTCTGA
rs957828	chr1:84253737	TTTAAATTTCTTGCTATTTTTCTTTTTTCTGTATACCACTTTTTTCTGCTTCTTATATTAG	TTTAAATTTCTTGCTATTTTTCTTTTTTCTTTATACCACTTTTTTCTGCTTCTTATATTAG
rs245111	chr19:55220709	GTCAGACCAATCGGAATGCACCGTGAGGTACCTCTCCACCAATCAGAGGTCACATTACCTA	GTCAGACCAATCGGAATGCACCGTGAGGTATCTCTCCACCAATCAGAGGTCACATTACCTA
rs4802648	chr19:55220866	AGGTTAACACTCCCTGACTTCTAGTAAAGGCAAGAAGCTAATTAGATGATTCTTTAACAAG	AGGTTAACACTCCCTGACTTCTAGTAAAGGTAAGAAGCTAATTAGATGATTCTTTAACAAG
rs962273	chr17:44333352	AAGACAAAAGGCTGGGCCCTGGAGGTCTACTCCAGAGGGCCATAGGACCCAGGATTTTAGG	AAGACAAAAGGCTGGGCCCTGGAGGTCTACCCCAGAGGGCCATAGGACCCAGGATTTTAGG
rs4789281	chr17:71870138	CTGTAGGGGCTGAGAAGGCAGGAGGCAAACACTAAGGAGACATTATAACAACTCAGGAGGC	CTGTAGGGGCTGAGAAGGCAGGAGGCAAACGCTAAGGAGACATTATAACAACTCAGGAGGC
rs140134	chr22:28487886	ACCGCGCCTGCGCTGGGGCCGACCTCGTTCCCCAAAGGCCCTAGACGTGCAACACTTTATG	ACCGCGCCTGCGCTGGGGCCGACCTCGTTCTCCAAAGGCCCTAGACGTGCAACACTTTATG
rs131291	chr22:28493990	GGCATAGAGCAGTTGTTTTGTAGCTGGGGTGGCTGCCTGGCCTAGTAAGGTAAATGACTCA	GGCATAGAGCAGTTGTTTTGTAGCTGGGGTAGCTGCCTGGCCTAGTAAGGTAAATGACTCA
rs937301	chr17:44401275	ACGTGATTCATCGCGCCTGGCCTACAAGTATCCCTTCTAACTGAGGGCAACTGTAAAGGAA	ACGTGATTCATCGCGCCTGGCCTACAAGTACCCCTTCTAACTGAGGGCAACTGTAAAGGAA
rs3848460	chr17:44402113	AATAAAAATAAAAAAGGGTACTTGTAGTGAAGACAGACTTGGGGTAGGGTGGCACTAACTG	AATAAAAATAAAAAAGGGTACTTGTAGTGAGGACAGACTTGGGGTAGGGTGGCACTAACTG
rs3809770	chr17:44402595	GTGCCTCTCTATTATACAGGAGCCACTCCAAGGCAGGGGCTTTCTGTCCCTGATCTGCCTG	GTGCCTCTCTATTATACAGGAGCCACTCCAGGGCAGGGGCTTTCTGTCCCTGATCTGCCTG
rs3895874	chr17:44402867	AAGGCGTTCTTTCCAGGCTCCTCCTCTGCCGCCGCCATGGGTACTTGGGACCATAAACAGC	AAGGCGTTCTTTCCAGGCTCCTCCTCTGCCACCGCCATGGGTACTTGGGACCATAAACAGC
rs9899404	chr17:44408827	ACTATGTGGACCTCTCCATAGGGCTTGTCATTTCTTTCCCCAGAGTGAGGGCATACACCTA	ACTATGTGGACCTCTCCATAGGGCTTGTCACTTCTTTCCCCAGAGTGAGGGCATACACCTA
rs3103564	chr3:127856962	ATGGGAAGTGTGAATTGGAAAGATTGATATTTTTAAAAGTTTAGATCACACAAGCTAAATA	ATGGGAAGTGTGAATTGGAAAGATTGATATGTTTAAAAGTTTAGATCACACAAGCTAAATA
rs9815125	chr3:127857553	ATACTGTGCTGGGCGCTGCGGATTTGGCAGAGAATGAGGCTGGCCGCCCTGCTCCTATGAG	ATACTGTGCTGGGCGCTGCGGATTTGGCAGGGAATGAGGCTGGCCGCCCTGCTCCTATGAG
rs6439020	chr3:127862350	CAGGAACGGAGAGTGAGGCGGCTGTGGGATGTTTCCTATGGCCTTCACTTTTGCTCCTGGG	CAGGAACGGAGAGTGAGGCGGCTGTGGGATATTTCCTATGGCCTTCACTTTTGCTCCTGGG
rs4797127	chr18:3871345	CATGTTGGTCAGGCTAGTCTCTACATGTTAATTGTTAAAGATAGAACTGGAGAGGGGCTCA	CATGTTGGTCAGGCTAGTCTCTACATGTTAGTTGTTAAAGATAGAACTGGAGAGGGGCTCA
rs1238960	chr18:3872464	AGTATAGCGGTGCATTCACAACTCATTGCAACCTCAACCTCCTGGGCTCAAGCAATCCTCT	AGTATAGCGGTGCATTCACAACTCATTGCAGCCTCAACCTCCTGGGCTCAAGCAATCCTCT
rs1238208	chr18:3872706	ATGGAATAGCAGCCTCTGTTAGTTACTAAAACTCCGGAAGATCCGAGCTTGGAAATGGACT	ATGGAATAGCAGCCTCTGTTAGTTACTAAAGCTCCGGAAGATCCGAGCTTGGAAATGGACT
rs992131	chr18:3875559	GAAAGGCAATTTCCCTCTCTATTTCCAGCAATTGTTATCATTACTTAAAATCTAATTGAGA	GAAAGGCAATTTCCCTCTCTATTTCCAGCAGTTGTTATCATTACTTAAAATCTAATTGAGA
rs994857	chr18:3879053	TGCTGCAGCAGGGGGACAGCCTGTCTTATGCGGGTACAATTGATGGGGGTAGAATATTCAC	TGCTGCAGCAGGGGGACAGCCTGTCTTATGGGGGTACAATTGATGGGGGTAGAATATTCAC
rs1991814	chr19:10508927	ACCACTACATTCTGTTGGAGTTGACCACCTTTTTTTTTTTTTTGAGTTGGAGTTTCCGTCT	ACCACTACATTCTGTTGGAGTTGACCACCTGTTTTTTTTTTTTGAGTTGGAGTTTCCGTCT
rs1357289	chr3:197504456	AATAAGGACAGTTAGCTGGAGAAGACACCGCGGCCTCTAAGGGGAACATCACTACAAAAAT	AATAAGGACAGTTAGCTGGAGAAGACACCGGGGCCTCTAAGGGGAACATCACTACAAAAAT
rs346522	chr19:48954385	CAGGCACAGCTGTAGGCTGGAGATCCTGTAATGAATAGGAAAAGCACCTGCCCTTTGGGAG	CAGGCACAGCTGTAGGCTGGAGATCCTGTAGTGAATAGGAAAAGCACCTGCCCTTTGGGAG
rs2859234	chr1:169350788	TGGGGTGTCAGAGTTGAATGATAATTTTGACTCCATTGCTACTGTCATGCACAGCCTCTGG	TGGGGTGTCAGAGTTGAATGATAATTTTGATTCCATTGCTACTGTCATGCACAGCCTCTGG
rs2639618	chr1:169351459	CACTCACACCTCCACCTGTCATCTCCAAAAGGTGTCTGCTCTTTCTGCAGTTAAGTATCCC	CACTCACACCTCCACCTGTCATCTCCAAAATGTGTCTGCTCTTTCTGCAGTTAAGTATCCC
rs2859236	chr1:169351508	GAGGTGTGAGTGAATCCTGGTTACACTCGTCACCAGGGTTACTTTTCTTCTCTGAGTCCAA	GAGGTGTGAGTGAATCCTGGTTACACTCGTGACCAGGGTTACTTTTCTTCTCTGAGTCCAA
rs10798130	chr1:169351758	AGAGATAAGGATTGTAGCAGGGCTGAGAAGATGACATACTAACATGGGTTTCTGACTCCAT	AGAGATAAGGATTGTAGCAGGGCTGAGAAGGTGACATACTAACATGGGTTTCTGACTCCAT
rs2021839	chr1:169352933	TTGGTATAATTTACATATATATATCAGTTGAGGCTTTTTAATTATATCATTCAAGTGTGCT	TTGGTATAATTTACATATATATATCAGTTGGGGCTTTTTAATTATATCATTCAAGTGTGCT
rs2021838	chr1:169353195	AATCAGTACCCTGTTCCACCACCTCCTTCTCTTCTGCTGGTACTCCACATTGGGCAAACTC	AATCAGTACCCTGTTCCACCACCTCCTTCTATTCTGCTGGTACTCCACATTGGGCAAACTC
rs2639617	chr1:169354477	ATTTGGAGGAACTGTTATTTTTACCCTATCCGTAACAGTTTTTCATATTTTTATGACCTTT	ATTTGGAGGAACTGTTATTTTTACCCTATCTGTAACAGTTTTTCATATTTTTATGACCTTT
rs2859239	chr1:169354549	CATTTAATGGTTCAGTAGGATGTTTTAGGAACATGATAGTTTTTTCATATACATATACATA	CATTTAATGGTTCAGTAGGATGTTTTAGGAGCATGATAGTTTTTTCATATACATATACATA
rs2859242	chr1:169356521	CGAGAGGTACTAGTCTGAAATGGAGAGGCTCATCAGTTCAGGGTAGGATCTCAGAGAGATA	CGAGAGGTACTAGTCTGAAATGGAGAGGCTTATCAGTTCAGGGTAGGATCTCAGAGAGATA
rs10753023	chr1:169357028	TTCAGTAGAATTTTTATAATTTAAAAGATATGGGCCATGCACGGTGGCTCACGCCTGTAAT	TTCAGTAGAATTTTTATAATTTAAAAGATACGGGCCATGCACGGTGGCTCACGCCTGTAAT
rs2010492	chr19:10664395	CAACCAGCACCAGACTTGACATGTAATCACTGTGCAATAATAAACACGACAGCAGGGCACA	CAACCAGCACCAGACTTGACATGTAATCACCGTGCAATAATAAACACGACAGCAGGGCACA
rs6748256	chr2:112520105	TGGGAGGAGGTGAAAAAATAAAAAGAGACTAAAGCCCTGTTTAGTCTAAAACTAATTACTC	TGGGAGGAGGTGAAAAAATAAAAAGAGACTCAAGCCCTGTTTAGTCTAAAACTAATTACTC
rs4567941	chr2:112525450	ATGTGAATTTTTTCCTCATTTCCTTGAATAGCTTGATTAGATGCATTTTTGCATTTTGGGC	ATGTGAATTTTTTCCTCATTTCCTTGAATACCTTGATTAGATGCATTTTTGCATTTTGGGC
rs6722814	chr2:112527313	ATTCCTCCAGTTCTCTCGTAACTAAAACGATTTCAGACTTACCCCTCACTCCCACAGGTAA	ATTCCTCCAGTTCTCTCGTAACTAAAACGACTTCAGACTTACCCCTCACTCCCACAGGTAA
rs3811642	chr2:112528087	GAGCCCCGCCTCCCCACTGCGCCTCATCTCCCAGACAGGCCCCGCCTCCCCACTCAGGCCC	GAGCCCCGCCTCCCCACTGCGCCTCATCTCTCAGACAGGCCCCGCCTCCCCACTCAGGCCC
rs952498	chr2:223370488	CTATAAACACAAATACTTTGTATAGTTCAACCTGAAATCCATGGAGATAATCCATAATAAA	CTATAAACACAAATACTTTGTATAGTTCAAACTGAAATCCATGGAGATAATCCATAATAAA
rs1947132	chr2:223370687	AACACTTTTTAAAAGCAGTGTAGAATAAACACACATATGAAGAAAACTAGGCTGCAAAATT	AACACTTTTTAAAAGCAGTGTAGAATAAACCCACATATGAAGAAAACTAGGCTGCAAAATT
rs1947133	chr2:223370849	CACTTACATTCTTATATTCTACAGATGGCACGGATAGGTATTTAAAAAATATAGTGTCTCC	CACTTACATTCTTATATTCTACAGATGGCATGGATAGGTATTTAAAAAATATAGTGTCTCC
rs6756527	chr2:223375570	CACCCTCATGTTATTTATTCCCTTTGTGGCATTTGGAAACAGGAGCTGTCATAAGCCCATT	CACCCTCATGTTATTTATTCCCTTTGTGGCGTTTGGAAACAGGAGCTGTCATAAGCCCATT
rs4674681	chr2:223375634	CTGGCAATGGAATTGAAGATCAAGAGCTCATAGAATTTGTCCCGGGTCAGGAAGCTAGACA	CTGGCAATGGAATTGAAGATCAAGAGCTCACAGAATTTGTCCCGGGTCAGGAAGCTAGACA
rs6710583	chr2:223376490	TTAGGCAGATCCAGCTGCAAATCCTTTGGACGCTCAAATTCCCTGAGCCTCAGTTTCTACA	TTAGGCAGATCCAGCTGCAAATCCTTTGGATGCTCAAATTCCCTGAGCCTCAGTTTCTACA
rs6739216	chr2:223376652	TTCTTTCCCTGCCCTATTTCACTGTAGCTTATCTGATCAAACTTTGAGTACAAAAGAATGA	TTCTTTCCCTGCCCTATTTCACTGTAGCTTGTCTGATCAAACTTTGAGTACAAAAGAATGA
rs6710844	chr2:223376721	TGTTTCCTGTCATTTTTTTGCACATCTTACCAAAATAAACAGAAAACTAACCAATAGTGGC	TGTTTCCTGTCATTTTTTTGCACATCTTACAAAAATAAACAGAAAACTAACCAATAGTGGC
rs11242415	chr5:137440685	TGTGTTGCTTGGTTGATTGATGACTTTTTCGATTATATCTTACATCCATAAGCATAGTGCA	TGTGTTGCTTGGTTGATTGATGACTTTTTCAATTATATCTTACATCCATAAGCATAGTGCA
rs217259	chr5:137440862	TTATGGCAACAAAAGAGCCTGTTGTACTATTCACTGCCAGCAGATGGCAGGCCTTCATCAG	TTATGGCAACAAAAGAGCCTGTTGTACTATCCACTGCCAGCAGATGGCAGGCCTTCATCAG
rs4835761	chr5:137445768	CAGCAACCAAGAAGGACTTTCCCACCTTTTGTTCTAGTCCCCAAGCATACCTAATGGTGCC	CAGCAACCAAGAAGGACTTTCCCACCTTTTATTCTAGTCCCCAAGCATACCTAATGGTGCC
rs10041787	chr5:137447393	AAATTGACATATAGAAGAAAGAAATCTCACGTATAGGAGAAAAGCAGCCTCCTTCTCATTC	AAATTGACATATAGAAGAAAGAAATCTCACTTATAGGAGAAAAGCAGCCTCCTTCTCATTC
rs17534709	chr15:83115401	AGGGGAAAGACATGACCCCCACACAGGAGAGGCTCACATACTGATGGGAAGGACTGATGAG	AGGGGAAAGACATGACCCCCACACAGGAGACGCTCACATACTGATGGGAAGGACTGATGAG
rs9920528	chr15:83120574	TTTGGCTTGCTGCTTCCAACAGGTTATAGATACTGGTGTATGCTGAAACTTTTTATTTTGA	TTTGGCTTGCTGCTTCCAACAGGTTATAGACACTGGTGTATGCTGAAACTTTTTATTTTGA
rs12974373	chr19:10223425	AAACCACATAACTGGATAAAGAAAAAACCATCTCCGACAGCCTTGGAGGCGGGATGAAGGC	AAACCACATAACTGGATAAAGAAAAAACCACCTCCGACAGCCTTGGAGGCGGGATGAAGGC
rs12828421	chr12:7226484	ACCCAGAAGTTTATTTACTGGACTTTAGCATATAAAGCCAGCAAGTCCATCCTTTTCTCCT	ACCCAGAAGTTTATTTACTGGACTTTAGCACATAAAGCCAGCAAGTCCATCCTTTTCTCCT
rs7977234	chr12:7226665	TCCTACAAAGAAAAAGAAGGACAAAGGCCCCAGTGGTCAAAAACTCTATCTCAATCCTGAC	TCCTACAAAGAAAAAGAAGGACAAAGGCCCTAGTGGTCAAAAACTCTATCTCAATCCTGAC
rs7426091	chr2:112361481	AAAATATATTATACAAGTGGCCAAAAAGGACGATAAAAGATGACCAACATCATTAGTCATT	AAAATATATTATACAAGTGGCCAAAAAGGATGATAAAAGATGACCAACATCATTAGTCATT
rs10860738	chr12:100370465	TACCGTTTTATACCTGTTATTATAAGATCTGCATATCAGAAGAAGGACTGTGTGTTAACAT	TACCGTTTTATACCTGTTATTATAAGATCTACATATCAGAAGAAGGACTGTGTGTTAACAT
rs17507019	chr12:100371311	ATTAAAAAAAGAAGGGTGGGCCTGAGTTGCCTGGGTTAGAAGTTTCCGGTGGGGCTATGCA	ATTAAAAAAAGAAGGGTGGGCCTGAGTTGCATGGGTTAGAAGTTTCCGGTGGGGCTATGCA
rs8065669	chr17:43079995	TTCCACAGTTAATAGATGAAGCAAAAGGCTGGGGTTAGCTGCTAAGCCATGGGAAATCCAC	TTCCACAGTTAATAGATGAAGCAAAAGGCTAGGGTTAGCTGCTAAGCCATGGGAAATCCAC
rs4234661	chr3:120771562	CTGTTTCTTTGTTTTGAGCTAGTCATGGCCATAAATGCCTTCTACATCTGTAGGCGACCAA	CTGTTTCTTTGTTTTGAGCTAGTCATGGCCGTAAATGCCTTCTACATCTGTAGGCGACCAA
rs4407429	chr3:120771587	TGGCCATAAATGCCTTCTACATCTGTAGGCGACCAAACTGGAGAAAATAATCTACATGTAA	TGGCCATAAATGCCTTCTACATCTGTAGGCAACCAAACTGGAGAAAATAATCTACATGTAA
rs10511393	chr3:120772741	AATCTGAGAGTGCTGTTAAGGATCTTCACTCCATAAAATCCTGTTCTTCATCATGTGGTAC	AATCTGAGAGTGCTGTTAAGGATCTTCACTGCATAAAATCCTGTTCTTCATCATGTGGTAC
rs16830002	chr3:120773398	TGAGCTTCTCTTCCTGTGGGAAATCCCAGCGAAACCAGGAGAAAGGGAGCAACAGAGGTCA	TGAGCTTCTCTTCCTGTGGGAAATCCCAGCAAAACCAGGAGAAAGGGAGCAACAGAGGTCA
rs16830004	chr3:120773513	CAAAGGCTGGAAAGCCCTGACCTACAGGAGCGGGCTACTGCATTGTTGGGAGGAGCAGGAT	CAAAGGCTGGAAAGCCCTGACCTACAGGAGTGGGCTACTGCATTGTTGGGAGGAGCAGGAT
rs16830008	chr3:120773942	CACCTGGCCACTCCTAGGTTTTAAAACACCGGTTTGTATCCACTTATCTCTTTTGCTCCTC	CACCTGGCCACTCCTAGGTTTTAAAACACCAGTTTGTATCCACTTATCTCTTTTGCTCCTC
rs12487334	chr3:120774109	TCATCAACAAGAGGCTTAAGGCTCTTTGGGAGTGGGATATAGAATATTTATTTATTTATTT	TCATCAACAAGAGGCTTAAGGCTCTTTGGGGGTGGGATATAGAATATTTATTTATTTATTT
rs12496520	chr3:120777006	AAGTGTCTGAAATATCTTAAGATCAGGTCCGAGGGCTACAAGTTTATTTCTCAGCAACAGC	AAGTGTCTGAAATATCTTAAGATCAGGTCCAAGGGCTACAAGTTTATTTCTCAGCAACAGC
rs529650	chr3:120777818	TAGACATTTTGTTACATAAGATAATAAGTGCCATTATTATTTAAGCCCAGTGAGTATGTGG	TAGACATTTTGTTACATAAGATAATAAGTGTCATTATTATTTAAGCCCAGTGAGTATGTGG
rs12494451	chr3:120779887	TACACCCTTTCTCTACTGCAAAACTTGTGCGCCTCAGTGATTGGCATACTGTGTGAAAGAC	TACACCCTTTCTCTACTGCAAAACTTGTGCACCTCAGTGATTGGCATACTGTGTGAAAGAC
rs12983573	chr19:10562833	TGCCTCTCCACCTGAAATTAACATCAACATTGACAGCAGCACTGCACTTTAATTAAAACAT	TGCCTCTCCACCTGAAATTAACATCAACATCGACAGCAGCACTGCACTTTAATTAAAACAT
rs286927	chr11:34598174	AAGAAAAATACCATCCCCCAACCATTAACTTTCTCTGTTGAACCTTCCAGGACACTGGCCT	AAGAAAAATACCATCCCCCAACCATTAACTCTCTCTGTTGAACCTTCCAGGACACTGGCCT
rs286926	chr11:34599069	TTAAAAAAATAAAATAAAGGATTACAAACACTGGCTCATTTGCATTTGGCCAACTCACACG	TTAAAAAAATAAAATAAAGGATTACAAACATTGGCTCATTTGCATTTGGCCAACTCACACG
rs4794063	chr17:43159493	AGCGTGGGGGTTAACCCCTCAGCCTGTGCCCTCCCTCCAAGTCCCTTTTCCTTGGCTCTTC	AGCGTGGGGGTTAACCCCTCAGCCTGTGCCTTCCCTCCAAGTCCCTTTTCCTTGGCTCTTC
rs4794067	chr17:43163827	TTCCCTGTTCCTTAAGGTACGGAGAAATGGTGGGTAAGGTGTTGGGGAGGAGGCCAGTCCT	TTCCCTGTTCCTTAAGGTACGGAGAAATGGCGGGTAAGGTGTTGGGGAGGAGGCCAGTCCT
rs2115299	chr19:53240008	GCCCCCTCCTCCCCTAACCCTACCTAGTGTGGAGTCGCAAAACCCCTTTGGGCTTTGACAC	GCCCCCTCCTCCCCTAACCCTACCTAGTGTAGAGTCGCAAAACCCCTTTGGGCTTTGACAC
rs17114393	chr10:103901685	CCCTGGGTATTGGAGGCAGTGAAGATGAAGGGCGAGAATCCATTGGCCGTGCCAGTACGCC	CCCTGGGTATTGGAGGCAGTGAAGATGAAGAGCGAGAATCCATTGGCCGTGCCAGTACGCC
rs885352	chr7:38889408	AAAGAAAAAGAAAATGGTTAGCTAACAGACAAAGTATCATGATTGTTATCGCATCTGTGAT	AAAGAAAAAGAAAATGGTTAGCTAACAGACGAAGTATCATGATTGTTATCGCATCTGTGAT
rs1527952	chr7:38892560	ATAGGATTAAAGAAAATTTCAGCCACACTAACTGCAAAATGGAGAGACACAGAGAAAGAGA	ATAGGATTAAAGAAAATTTCAGCCACACTACCTGCAAAATGGAGAGACACAGAGAAAGAGA
rs5008508	chr7:38892902	CAAATTTTCAAAATGTTCTACAATAAATACGTATACTTACGTCAATAAAAAACACATAAAA	CAAATTTTCAAAATGTTCTACAATAAATACATATACTTACGTCAATAAAAAACACATAAAA
rs10951593	chr7:38894630	ATCCAGGCTTTAACACCCTTCACAGCCACTGGCTCTGGCTCATCATCCAAAATCTGGGATA	ATCCAGGCTTTAACACCCTTCACAGCCACTAGCTCTGGCTCATCATCCAAAATCTGGGATA
rs10464366	chr7:38894740	ACTGGGTAAAAAAGGTGCTGACTTTTGGAGATGAATTGGCCAGGTTTGAAAATGCAGCTTT	ACTGGGTAAAAAAGGTGCTGACTTTTGGAGTTGAATTGGCCAGGTTTGAAAATGCAGCTTT
rs1405000	chr7:38894754	GTGCTGACTTTTGGAGATGAATTGGCCAGGTTTGAAAATGCAGCTTTACCACTTAGCTGCG	GTGCTGACTTTTGGAGATGAATTGGCCAGGGTTGAAAATGCAGCTTTACCACTTAGCTGCG
rs10464368	chr7:38894821	TGGGGCAAGAAATTTAGCCCACTGAGCCTCCGTCTCTTACCCATACAATGGGGCTAATACC	TGGGGCAAGAAATTTAGCCCACTGAGCCTCTGTCTCTTACCCATACAATGGGGCTAATACC
rs11247593	chr1:26736222	TTTGTGATGGGAGGGAGTCAAAAATCTGACGACCAGAAAAAGAAAGCATATTAATTTTATT	TTTGTGATGGGAGGGAGTCAAAAATCTGACAACCAGAAAAAGAAAGCATATTAATTTTATT
rs6537748	chr1:112926423	CTACCTTCAACTATTTATAGACTCTGAATATCCACAGATTTGCAAAGAACAGCTTTTTAAA	CTACCTTCAACTATTTATAGACTCTGAATAGCCACAGATTTGCAAAGAACAGCTTTTTAAA
rs2932538	chr1:112928585	AGGGGGTGGGGCTACAATAACAAACCTTTGTATCTATTTTTTTCCCGCAGAATGAAATGAC	AGGGGGTGGGGCTACAATAACAAACCTTTGCATCTATTTTTTTCCCGCAGAATGAAATGAC
rs5763189	chr22:28110920	TTTATATTTAATATAATTTTAGATGTTTAAGCAGCCTCAAAGCCTTTAAAAGTTATTTTTA	TTTATATTTAATATAATTTTAGATGTTTAATCAGCCTCAAAGCCTTTAAAAGTTATTTTTA
rs5752907	chr22:28113575	GGGGGCTCACTGTTGAGTATGGGAGAAAGATAAACAAAGGGACAATTATAACTCAGAGTGG	GGGGGCTCACTGTTGAGTATGGGAGAAAGACAAACAAAGGGACAATTATAACTCAGAGTGG
rs2267137	chr22:28118079	ACAGCAAGAAACTGCAGTTACCTGCCGACCGATGGGCCAAACAGAACAAAAGAAAACCCAG	ACAGCAAGAAACTGCAGTTACCTGCCGACCCATGGGCCAAACAGAACAAAAGAAAACCCAG
rs714962	chr22:28118389	CTAGCCAAGGCCCGGGCTGGAGAGTCTGGGTGTCATGAAGTCCAGCTCAGCCCCAGATGGA	CTAGCCAAGGCCCGGGCTGGAGAGTCTGGGCGTCATGAAGTCCAGCTCAGCCCCAGATGGA
rs2188121	chr22:28118581	GAGCAGGGCAAATTCCCCACGCAAAGCAGCAAGCTGCACCTGTCAGAGCTCTCAGTGCTGT	GAGCAGGGCAAATTCCCCACGCAAAGCAGCCAGCTGCACCTGTCAGAGCTCTCAGTGCTGT
rs4688008	chr3:120696564	GTCTCAGCTCAAAATTCCCAAGGACAAAAACTTTAATGGACTCATTTGGGTCACCTCCAAG	GTCTCAGCTCAAAATTCCCAAGGACAAAAAATTTAATGGACTCATTTGGGTCACCTCCAAG
rs2049500	chr3:120699244	ACAACCTCTGCTAACATATGCTTCGAAGTACAGTTTTCATTAAAATGAATGCATTTAAAAT	ACAACCTCTGCTAACATATGCTTCGAAGTATAGTTTTCATTAAAATGAATGCATTTAAAAT
rs2280670	chr3:120700002	AAGCCGGAGCCCAAAAGACTTCCGGTTGAGGGCGGGTTGGGCCACTGCTGTGCTGAGTGCA	AAGCCGGAGCCCAAAAGACTTCCGGTTGAGAGCGGGTTGGGCCACTGCTGTGCTGAGTGCA
rs1480745	chr4:71372750	GGTGATGATGACATCATAATTCCCTCTGAATGCTCTGACTTTGGAAATAAAATAATTGAGT	GGTGATGATGACATCATAATTCCCTCTGAAAGCTCTGACTTTGGAAATAAAATAATTGAGT
rs1947865	chr4:71373156	CTGAGGACAGAAATAACATGGCCTTTCTAGCCTTCCATCAGAGAGTGTCATGTCTCTAAAA	CTGAGGACAGAAATAACATGGCCTTTCTAGGCTTCCATCAGAGAGTGTCATGTCTCTAAAA
rs2332000	chr4:71374603	CTTTTCCTTTTTGTACACACAAAAAAAAACTTCACCAAAGTAGGTACCAAATCTTCTGTTT	CTTTTCCTTTTTGTACACACAAAAAAAAACCTCACCAAAGTAGGTACCAAATCTTCTGTTT
rs2127787	chr4:71374868	TCGTCTAAGACAGAAAGCTGAAAACTTTGAAGTTGAGTCCATATTTAATAAATAATAACTA	TCGTCTAAGACAGAAAGCTGAAAACTTTGAGGTTGAGTCCATATTTAATAAATAATAACTA
rs2332001	chr4:71381159	TTACTAATTCTAAACCCAAAAGGTGCCTGGCAGTCTCTGCTATGTCTGTTTCAAGTAACCC	TTACTAATTCTAAACCCAAAAGGTGCCTGGAAGTCTCTGCTATGTCTGTTTCAAGTAACCC
rs6003909	chr22:22506206	CGTGCTGGCTCACTAACTGACGACCTAGCCACAACGTTGTCCTCGCTGCCAGCCCAAGACA	CGTGCTGGCTCACTAACTGACGACCTAGCCGCAACGTTGTCCTCGCTGCCAGCCCAAGACA
rs2070464	chr22:22508429	GGGAGTGCAGCCTTGGAGGGAAGTGTGGAAAACGAGGGATGCTCTGGACAGGGCCCTGAGG	GGGAGTGCAGCCTTGGAGGGAAGTGTGGAAGACGAGGGATGCTCTGGACAGGGCCCTGAGG
rs9624335	chr22:22508882	ACAGTGTGCAGCAGGGCGGGGACCCAGGGCCTCTGACGCCTGGGCGGGCGCCCGGTGGGCA	ACAGTGTGCAGCAGGGCGGGGACCCAGGGCTTCTGACGCCTGGGCGGGCGCCCGGTGGGCA
rs5751749	chr22:22509404	CCTTGAGCCCCTCCAGATAATTCTTTATAGAGGGAAGCCCTGGGCATCCCAAGTTCCCAGG	CCTTGAGCCCCTCCAGATAATTCTTTATAGGGGGAAGCCCTGGGCATCCCAAGTTCCCAGG
rs5751751	chr22:22509469	TAGAGATGCAGGGTGTGCCTTACCCTAACATCAGGGTGGCAGACCTGTCGGCTGGGCCAGC	TAGAGATGCAGGGTGTGCCTTACCCTAACAGCAGGGTGGCAGACCTGTCGGCTGGGCCAGC
rs6003911	chr22:22510153	CTCTAGTCCTTTCCCTTCTCTCCTATGCCTTACCACCACCACTAACTCTTATTCAGGCCTC	CTCTAGTCCTTTCCCTTCTCTCCTATGCCTCACCACCACCACTAACTCTTATTCAGGCCTC
rs6003914	chr22:22511191	AGTGCCTTTTGGGCCCTGAGCACTTGTCCATTGGGGGACCTCTCCCCTCTTTGAGCACGGG	AGTGCCTTTTGGGCCCTGAGCACTTGTCCACTGGGGGACCTCTCCCCTCTTTGAGCACGGG
rs735750	chr22:22511677	GGAAGAAGAGTTGCTTGTGACGGGAGGGAGAAGCGGGGCCAGGCCAGGCAGAGGTGTGTCG	GGAAGAAGAGTTGCTTGTGACGGGAGGGAGGAGCGGGGCCAGGCCAGGCAGAGGTGTGTCG
rs353571	chr11:35107889	ATTAATTTATCTTTCTGTGTTTTGGGTCCAATTTCAGCTACGAGGTAAAACGGCTTAAACA	ATTAATTTATCTTTCTGTGTTTTGGGTCCAGTTTCAGCTACGAGGTAAAACGGCTTAAACA
rs353570	chr11:35107917	ATAGCCTATCTTTCATTCTGCCTTTCAGATTAATTTATCTTTCTGTGTTTTGGGTCCAATT	ATAGCCTATCTTTCATTCTGCCTTTCAGATGAATTTATCTTTCTGTGTTTTGGGTCCAATT
rs2732573	chr11:35108799	AGTAAGCAGTAAAAATCTAGCATATAAATCGACCTTAGAACAAGTCCAGTAATACTCTAAG	AGTAAGCAGTAAAAATCTAGCATATAAATCAACCTTAGAACAAGTCCAGTAATACTCTAAG
rs353566	chr11:35109882	ATTCGCCACAGAGGACAAGCCACAGATGAGGAGGACCTGCCCTCTCTCTTCAGAGACTATG	ATTCGCCACAGAGGACAAGCCACAGATGAGAAGGACCTGCCCTCTCTCTTCAGAGACTATG
rs398734	chr11:35110454	CCTACAGTTGTATGTCAATCCAAATGAGTGGCAGGTCTTCCGAGTCCCATCCTCCCAGATC	CCTACAGTTGTATGTCAATCCAAATGAGTGACAGGTCTTCCGAGTCCCATCCTCCCAGATC
rs2257171	chr11:35110691	TGGTAGGGGCATCCGCCATCCACTTGAGCCACTGTTTACTCTTTTGTAAAATGGTGTGATG	TGGTAGGGGCATCCGCCATCCACTTGAGCCGCTGTTTACTCTTTTGTAAAATGGTGTGATG
rs2732572	chr11:35111380	TAAGACAACTTTAAATGTGTAGACTCGGACCGTGGCTATTCAATGGACAATTTTAGATTTG	TAAGACAACTTTAAATGTGTAGACTCGGACTGTGGCTATTCAATGGACAATTTTAGATTTG
rs6736093	chr2:112371473	TGGCTTATGTTATGTTGTTAAAGGGACCACATTAAAATACATTCATTCTAAAAGTGTTACC	TGGCTTATGTTATGTTGTTAAAGGGACCACGTTAAAATACATTCATTCTAAAAGTGTTACC
rs9908652	chr17:2255867	GCCATGCTCATTTCAGAAGGTGCAGCCTCCGTGTCCGTGGGTCCGCACCCATGGAGGCAAC	GCCATGCTCATTTCAGAAGGTGCAGCCTCCATGTCCGTGGGTCCGCACCCATGGAGGCAAC
rs2680650	chr3:53751014	AGAAGATTTAAGTCGGTGAAGCAATTCTACCGAAATTAAAAAGTAACAATCATTTTTTTCC	AGAAGATTTAAGTCGGTGAAGCAATTCTACAGAAATTAAAAAGTAACAATCATTTTTTTCC
rs1380612	chr3:53755702	GTGTGTGAACGGTGCCTCTGGAGGTGCAGAGACACAGCCAAATTGCAATTGGTGCTCTCTG	GTGTGTGAACGGTGCCTCTGGAGGTGCAGAAACACAGCCAAATTGCAATTGGTGCTCTCTG
rs3846215	chr3:53757180	CCCATCAACATCTTAGCCATTCTTCAGGACCCTGTTCTGCACATCTAGGACACACCAGACC	CCCATCAACATCTTAGCCATTCTTCAGGACTCTGTTCTGCACATCTAGGACACACCAGACC
rs6583823	chr10:94334395	GAGGTCTGGAGAGTCTTGGAAGAATTCTTACGTTAAATAAAAATTCAGGATGCAAAATTCT	GAGGTCTGGAGAGTCTTGGAAGAATTCTTATGTTAAATAAAAATTCAGGATGCAAAATTCT
rs6583826	chr10:94337810	AGTTTGAACTCAACAAAGGCAATGTAAAATGACATTTCAGGGACTGCTTAGTGCAACAAAA	AGTTTGAACTCAACAAAGGCAATGTAAAATAACATTTCAGGGACTGCTTAGTGCAACAAAA
rs2297743	chr10:94342803	GACAGAGTAGCCGGACCAATGGCTGCGCTGGCGCGCAAGGCACCATGGGATGCAGTATCCT	GACAGAGTAGCCGGACCAATGGCTGCGCTGCCGCGCAAGGCACCATGGGATGCAGTATCCT
rs3765154	chr2:60695223	TTCATTACACAATTGTGTGCGCTCTGACGATGGCACCCTATCAGGGCTGCTATCTGTGGCT	TTCATTACACAATTGTGTGCGCTCTGACGACGGCACCCTATCAGGGCTGCTATCTGTGGCT
rs17029708	chr2:60695448	AGTTTTGCAGCTGCTTTCCCTGGGTGCCAAAGGAGAGGTAAGCAGCGACGATTCCCCGACA	AGTTTTGCAGCTGCTTTCCCTGGGTGCCAATGGAGAGGTAAGCAGCGACGATTCCCCGACA
rs12328348	chr2:60697588	GAGGGAGGGAGGAAGGAAGGAGCGAGCTGAACCTGCTCTAAGTCTATACTTTCCTCTAGAT	GAGGGAGGGAGGAAGGAAGGAGCGAGCTGAGCCTGCTCTAAGTCTATACTTTCCTCTAGAT
rs13382983	chr2:60700704	TTGGTTTTGTTTTGTTTTGTTTTTTAAGGCGGTAAGACACACATACACAGGCACAAGCATG	TTGGTTTTGTTTTGTTTTGTTTTTTAAGGCAGTAAGACACACATACACAGGCACAAGCATG
rs538136	chr3:120791950	ACCCCCAAGCCCAGAGAGTAAAACAAATGATGGTAGGCTGCTCCCCAGTCCCTATCTAAAT	ACCCCCAAGCCCAGAGAGTAAAACAAATGACGGTAGGCTGCTCCCCAGTCCCTATCTAAAT
rs1534154	chr3:120793720	GAGCAAAGAAAGAATCCTTTGGTCTCCCAATCTACAGAGCTGTGGATAGAAACATTTACTA	GAGCAAAGAAAGAATCCTTTGGTCTCCCAACCTACAGAGCTGTGGATAGAAACATTTACTA
rs2692621	chr3:120794630	TCTTATGTCATTTGGGAAACTTTTGACACAACCCCGGGTGCTCACAGGGTTTTCTTTCTCT	TCTTATGTCATTTGGGAAACTTTTGACACAGCCCCGGGTGCTCACAGGGTTTTCTTTCTCT
rs528765	chr3:120795399	GACTGGAACAGATTCCAGGATGTTGGATTCCCAGCACATTCTACAGTTATTCTTGAGAACT	GACTGGAACAGATTCCAGGATGTTGGATTCTCAGCACATTCTACAGTTATTCTTGAGAACT
rs530783	chr3:120795659	CCAAAATGGCTTGAAGCCCTTATCCTACCTGATTTTCAGAAAGTCCAATCTTGCCAGATTC	CCAAAATGGCTTGAAGCCCTTATCCTACCTAATTTTCAGAAAGTCCAATCTTGCCAGATTC
rs593968	chr3:120798879	AGTTGAACATCTCCAAAGTTGGACTTGACTCCTAGCCCCAAGATTCTACAAAATGATAGTA	AGTTGAACATCTCCAAAGTTGGACTTGACTTCTAGCCCCAAGATTCTACAAAATGATAGTA
rs7205258	chr16:73200040	CATCACCAGAAGTCCTTGAGATGTCACTAGCGTATGTTAATTTTTTTTTTTTTTTTTTGAG	CATCACCAGAAGTCCTTGAGATGTCACTAGTGTATGTTAATTTTTTTTTTTTTTTTTTGAG
rs12702628	chr7:7454188	CAATAGAAGCACTTAAGGATGGGTAACGGGGAAGAACCACTGGCCAGTACTAGGGGAGACA	CAATAGAAGCACTTAAGGATGGGTAACGGGAAAGAACCACTGGCCAGTACTAGGGGAGACA
rs3757527	chr7:7454816	ACATCTGTTTAATGAAATCCTTTAAAGTACCGTTAGTGAGTAAAACTAAGACAAACCTATT	ACATCTGTTTAATGAAATCCTTTAAAGTACTGTTAGTGAGTAAAACTAAGACAAACCTATT
rs4720745	chr7:7457510	CCTAATGTGATTTGACTGTATCACCTTTTTGCCACCTTCACTTGTCACCTTAAGTTTACAG	CCTAATGTGATTTGACTGTATCACCTTTTTACCACCTTCACTTGTCACCTTAAGTTTACAG
rs1859603	chr7:7461033	CCAGTGGCCTCCTTCTTCTTAAAGAAGTCATTTCGTTCTAAATCAGGAGATTTCCATTAGG	CCAGTGGCCTCCTTCTTCTTAAAGAAGTCACTTCGTTCTAAATCAGGAGATTTCCATTAGG
rs4720747	chr7:7463221	ATGTTTGTTTTTCTGAGTGTTTATTTCATTCGAGTTCTCAAAGCATAGTTTTATTATCTTT	ATGTTTGTTTTTCTGAGTGTTTATTTCATTTGAGTTCTCAAAGCATAGTTTTATTATCTTT
rs2083127	chr3:53891977	AGAACAGATCATAGGGGGACAGGACAAGGAGTTCGAGTTAAGAGGCTGTTGTAGTCATCCA	AGAACAGATCATAGGGGGACAGGACAAGGAATTCGAGTTAAGAGGCTGTTGTAGTCATCCA
rs747226	chr22:18109716	AGACTCCTCATCCCACTCTGAGACACTCCCACAGTGGGGACCCATAGGGACTGAGGCCCAG	AGACTCCTCATCCCACTCTGAGACACTCCCGCAGTGGGGACCCATAGGGACTGAGGCCCAG
rs4819519	chr22:18110557	AGATATGATGTAGAGGTGTGCGTATATGTGTGTAAAGGGATACATGGCAGGTATAATTTGC	AGATATGATGTAGAGGTGTGCGTATATGTGCGTAAAGGGATACATGGCAGGTATAATTTGC
rs5993820	chr22:18112175	GGAGGGGCTGGATTGACTTTAGGGCACTGGTAAAAGCTCACATCCATCTGTCCACCCAGAA	GGAGGGGCTGGATTGACTTTAGGGCACTGGCAAAAGCTCACATCCATCTGTCCACCCAGAA
rs8138086	chr22:18113199	AATTCAGCACTGGCTTCAGCCTCCTGCCATTCTTGCTGGGTCTCAGGAGGGAACCGGGCCA	AATTCAGCACTGGCTTCAGCCTCCTGCCATCCTTGCTGGGTCTCAGGAGGGAACCGGGCCA
rs2243204	chr5:132027393	TCATTAGGGTCAAAGAGAAATGTCTTCTGCCTATGCCCTTCATCTAGCTGGTGCATTGTAA	TCATTAGGGTCAAAGAGAAATGTCTTCTGCTTATGCCCTTCATCTAGCTGGTGCATTGTAA
rs2243217	chr5:132029832	TATTTACATTTGCTATGCAATTACAATTTTAAAATCTTCTATTACAGAAAATTTCAAATAT	TATTTACATTTGCTATGCAATTACAATTTTTAAATCTTCTATTACAGAAAATTTCAAATAT
rs2243250	chr5:132037053	TCAAAACACCTAAACTTGGGAGAACATTGTCCCCCAGTGCTGGGGTAGGAGAGTCTGCCTG	TCAAAACACCTAAACTTGGGAGAACATTGTTCCCCAGTGCTGGGGTAGGAGAGTCTGCCTG
rs10421558	chr19:1763521	CTCGCAGAGCCTCGCAGAACAGGCCGGGATAGAAGACGCTCGGGAGCAGTGCCTGGGTCTG	CTCGCAGAGCCTCGCAGAACAGGCCGGGATGGAAGACGCTCGGGAGCAGTGCCTGGGTCTG
rs1709287	chr4:71194480	AGAATAAGCAGAAGCCAAGAGAATTTTTATCTTTCCTCATAGAATCCATTCACCCCACTCC	AGAATAAGCAGAAGCCAAGAGAATTTTTATTTTTCCTCATAGAATCCATTCACCCCACTCC
rs954042	chr10:133987445	CCTCATGTTATAATAACCCAACCTGTGGCAGTTAATGCTGTCCGGAGAGAGCGGGAAGCCA	CCTCATGTTATAATAACCCAACCTGTGGCACTTAATGCTGTCCGGAGAGAGCGGGAAGCCA
rs7914257	chr10:133987617	CAGCATATGAATTCCAGGGACCCACTCCAATCACAGCAGCTGGGAAAATGGAGGCCAAGAG	CAGCATATGAATTCCAGGGACCCACTCCAACCACAGCAGCTGGGAAAATGGAGGCCAAGAG
rs17504843	chr10:133988693	GTGGGAGGTAACTGAATCATGGGGACAAGTCTTTCCCATGTTGTTCTCATGATAGTGAATA	GTGGGAGGTAACTGAATCATGGGGACAAGTTTTTCCCATGTTGTTCTCATGATAGTGAATA
rs6560691	chr10:133990235	TGGTCACGGTCTGAACTAGGAAGCGCGCCCAGTCCTCCACTGCTGGTCACAGTCTGAACTA	TGGTCACGGTCTGAACTAGGAAGCGCGCCCGGTCCTCCACTGCTGGTCACAGTCTGAACTA
rs6560692	chr10:133991309	GTAATTTTTAAAACAAAAATTTAAAAACCACCAACACTTCATAGACCAAAAATGAATCAGA	GTAATTTTTAAAACAAAAATTTAAAAACCAGCAACACTTCATAGACCAAAAATGAATCAGA
rs1052281	chr10:133993932	CAGTACCTTCTCAGGAGCGTGGGGAGGCCAGCCACCCGGGCAGAGCAAGGAGAGAATGAGG	CAGTACCTTCTCAGGAGCGTGGGGAGGCCAACCACCCGGGCAGAGCAAGGAGAGAATGAGG
rs7095422	chr10:133993975	GCTCCTGAGAAGGTACTGGTTGTGCTTTCAGCTTCCTGATTGGTAGATAGTTGGGTATGTA	GCTCCTGAGAAGGTACTGGTTGTGCTTTCATCTTCCTGATTGGTAGATAGTTGGGTATGTA
rs828858	chr2:74333849	CCATATCCATTGTTTTGTGGGCTCTCAGCATCACATTCTTTTTCTTAGTCTCTTATTCATT	CCATATCCATTGTTTTGTGGGCTCTCAGCAACACATTCTTTTTCTTAGTCTCTTATTCATT
rs3108164	chr2:74334785	TATTTTACTTTTTTTGTTGTTGTTTTGAGACATGGTCTCACTCTCGTCGCCCAGGCTGGAG	TATTTTACTTTTTTTGTTGTTGTTTTGAGAGATGGTCTCACTCTCGTCGCCCAGGCTGGAG
rs4678999	chr3:33458748	ATTTTTCAATCAGGCTGTGCCCTAAGGAAGTACTGGGTCAAATATTTAGAAATTGAGCCTC	ATTTTTCAATCAGGCTGTGCCCTAAGGAAGGACTGGGTCAAATATTTAGAAATTGAGCCTC
rs2102050	chr3:33466151	TTTTTTAAAGTGTCCTAGTAAACCATACTGGTAACAAGTCTTACCGGGTGTTTGGCCTGCT	TTTTTTAAAGTGTCCTAGTAAACCATACTGATAACAAGTCTTACCGGGTGTTTGGCCTGCT
rs17366863	chr3:33466455	CTCAGATGGTAACGGACCTTGAGGACAGTCGTCCAGGACAGGAGATTAACACTGAGAAGGC	CTCAGATGGTAACGGACCTTGAGGACAGTCATCCAGGACAGGAGATTAACACTGAGAAGGC
rs17392837	chr3:33466455	CTCAGATGGTAACGGACCTTGAGGACAGTCGTCCAGGACAGGAGATTAACACTGAGAAGGC	CTCAGATGGTAACGGACCTTGAGGACAGTCATCCAGGACAGGAGATTAACACTGAGAAGGC
rs9491384	chr6:125673258	TTCTGTAACAAAACCAAACATGGCAATCAGTGTTAAAACACAAAATCACCAAAAGCTGAGT	TTCTGTAACAAAACCAAACATGGCAATCAGCGTTAAAACACAAAATCACCAAAAGCTGAGT
rs9491385	chr6:125674730	AATTAAAGCAAACTTTTCAAAGATGCCCAATGAGAAGGTAAGTGAGACACAACAGGAGTCT	AATTAAAGCAAACTTTTCAAAGATGCCCAACGAGAAGGTAAGTGAGACACAACAGGAGTCT
rs871071	chr6:154929780	AGATGGAGTATGGGGTTTCTATCTATTTAATATTTCTCCTAGCACGAAAGGACAAGAGACA	AGATGGAGTATGGGGTTTCTATCTATTTAACATTTCTCCTAGCACGAAAGGACAAGAGACA
rs6909467	chr6:20641141	TGATTGCTATTCTCTACTGAAATGAATTTTTTCAAAATAGCCTGCAATTGCAATAGGCAGT	TGATTGCTATTCTCTACTGAAATGAATTTTCTCAAAATAGCCTGCAATTGCAATAGGCAGT
rs4440462	chr6:55552575	CCTAAGGACTAGATTTATCCAAACGGAAAATTCTATACAAGTTCTTAGGATATTAGAATTG	CCTAAGGACTAGATTTATCCAAACGGAAAAATCTATACAAGTTCTTAGGATATTAGAATTG
rs12269628	chr10:133980149	CAGGAAAATCAGCAAAGCAAATCAGTGATCCTTTAAAAAGTCATTAAAATGTATAAAGCCC	CAGGAAAATCAGCAAAGCAAATCAGTGATCTTTTAAAAAGTCATTAAAATGTATAAAGCCC
rs17684904	chr19:1884930	CATGAAACAGCCCAAAACCTGGAGCAAGACGGTTCCCTGACGCTGAGCGATGCCATTCACA	CATGAAACAGCCCAAAACCTGGAGCAAGACAGTTCCCTGACGCTGAGCGATGCCATTCACA
rs10500203	chr19:1888178	GCCTGGCGTAGCGGCTCCGGCACAGTGGACGTTTACTTCTTGCTCCAGGCCGGCGACCCAG	GCCTGGCGTAGCGGCTCCGGCACAGTGGACATTTACTTCTTGCTCCAGGCCGGCGACCCAG
rs11672550	chr19:1888193	TCCGGCACAGTGGACGTTTACTTCTTGCTCCAGGCCGGCGACCCAGGCAGCTCCACAGGTG	TCCGGCACAGTGGACGTTTACTTCTTGCTCTAGGCCGGCGACCCAGGCAGCTCCACAGGTG
rs4755410	chr11:35402150	TTAACCTCTCTGCTATGCAACTTGGAGTGAGGATGTTATACTTGTTGGAACAGGTAGCCCC	TTAACCTCTCTGCTATGCAACTTGGAGTGAAGATGTTATACTTGTTGGAACAGGTAGCCCC
rs7122389	chr11:35402701	AGCCACTCAAAAGTCGCTGTCATTTAGTAACGTCCCAGAAATATGAATTTGACTTTTCCCC	AGCCACTCAAAAGTCGCTGTCATTTAGTAATGTCCCAGAAATATGAATTTGACTTTTCCCC
rs4756231	chr11:35403104	AAAGCAGATATCACAGGTCCTGGCATGTAGCGTGAATACACTGTGTGAATACAATGTCCTC	AAAGCAGATATCACAGGTCCTGGCATGTAGTGTGAATACACTGTGTGAATACAATGTCCTC
rs10768134	chr11:35403498	GAAAAGATTTCAGAAAGATAAGTGGGCTTAGAGCAATAAGTAGCAGGAGGAGAATGTTCAC	GAAAAGATTTCAGAAAGATAAGTGGGCTTACAGCAATAAGTAGCAGGAGGAGAATGTTCAC
rs10768135	chr11:35403575	CTTTGAACTAAGAATGCTAATGTGGCCACAGAAGTTATAACAGTCTTCTGAATTAGACCGA	CTTTGAACTAAGAATGCTAATGTGGCCACAAAAGTTATAACAGTCTTCTGAATTAGACCGA
rs10836396	chr11:35403593	AATGTGGCCACAGAAGTTATAACAGTCTTCTGAATTAGACCGACCTGGGAACCATCCATCT	AATGTGGCCACAGAAGTTATAACAGTCTTCCGAATTAGACCGACCTGGGAACCATCCATCT
rs10768136	chr11:35403660	TGTTTGGAGCAGTGAGATTCAAATTGAGTTTATCATTCTTTCTTTCCATTTTGAGTGACCT	TGTTTGGAGCAGTGAGATTCAAATTGAGTTCATCATTCTTTCTTTCCATTTTGAGTGACCT
rs1173920	chr11:35405563	TACCAAGCTACTCCAAAATGTTCTTTCCAACAGCCCTGAAAAGATAAACTTCCCCAAGCCC	TACCAAGCTACTCCAAAATGTTCTTTCCAATAGCCCTGAAAAGATAAACTTCCCCAAGCCC
rs1558473	chr2:191329570	CTGGGAGCTAAAAAGTATGTGTCAAGCACTTTAATGTCATCTGGCCTGTATAACTACATGT	CTGGGAGCTAAAAAGTATGTGTCAAGCACTGTAATGTCATCTGGCCTGTATAACTACATGT
rs1558471	chr2:191332279	AGATAAGCAAATTTATACTACACATTGCTTATAGAAAGAGCAGAAAAGTATATTAGGCAGT	AGATAAGCAAATTTATACTACACATTGCTTGTAGAAAGAGCAGAAAAGTATATTAGGCAGT
rs4853724	chr2:191336038	CATTCGACGAAGTATTACAAAAATAATATAGTCTCATTCCTTAGTAGTTTTTATATTCATC	CATTCGACGAAGTATTACAAAAATAATATACTCTCATTCCTTAGTAGTTTTTATATTCATC
rs9654074	chr4:41598260	AGCTATCTCTTCTCACTATTATTATTTCTTTACTTCTCGATCACTCCATAGCTTCCTGTAA	AGCTATCTCTTCTCACTATTATTATTTCTTCACTTCTCGATCACTCCATAGCTTCCTGTAA
rs1013586	chr4:41601359	TAATGGATATTTATTATTTTAAAGTAAAAACAAGGAAGTAATCAATGAAATAGGAAGAGGG	TAATGGATATTTATTATTTTAAAGTAAAAAAAAGGAAGTAATCAATGAAATAGGAAGAGGG
rs10865344	chr2:63970239	TACTTGCTCCACAGGTCATTATATGGCTGAACTTTTTTCCACTTGAGACATAAAGAATATC	TACTTGCTCCACAGGTCATTATATGGCTGATCTTTTTTCCACTTGAGACATAAAGAATATC
rs10187013	chr2:63970470	TAAAACACTGCATGGAATATTTGTGTGTGTATATATATATATATATAGTGAATATCAAAAG	TAAAACACTGCATGGAATATTTGTGTGTGTGTATATATATATATATAGTGAATATCAAAAG
rs17524052	chr2:63979359	TACTCCCTAACGCATCCTCACCCTCCCCCAACCAGATGTGATGAGGGGAGCAAGCGTCCCC	TACTCCCTAACGCATCCTCACCCTCCCCCAGCCAGATGTGATGAGGGGAGCAAGCGTCCCC
rs2736911	chr10:124204345	GTGGTTCCTGTGTCCTTCATTTCCACTCTGCGAGAGTCTGTGCTGGACCCTGGAGTTGGTG	GTGGTTCCTGTGTCCTTCATTTCCACTCTGTGAGAGTCTGTGCTGGACCCTGGAGTTGGTG
rs10490924	chr10:124204438	CTGTCTTTATCACACTCCATGATCCCAGCTGCTAAAATCCACACTGAGCTCTGCTTACCAG	CTGTCTTTATCACACTCCATGATCCCAGCTTCTAAAATCCACACTGAGCTCTGCTTACCAG
rs3750848	chr10:124205305	AACATGCTGCCATTTAGGCAAAATGGTTTAACATTGAATCAAGGACATTATGAGCCAGAAT	AACATGCTGCCATTTAGGCAAAATGGTTTACCATTGAATCAAGGACATTATGAGCCAGAAT
rs3750847	chr10:124205411	ACAATTCAAACAGAGCCCCAGGCAGCCACCGAAAGGTCTTGAATGACAGCTTGTCAATTTC	ACAATTCAAACAGAGCCCCAGGCAGCCACCAAAAGGTCTTGAATGACAGCTTGTCAATTTC
rs3750846	chr10:124205555	CGAACCCTTCCCCTAAATCAGTTGCATGAGACCAGCAGTCCATCTTTGCATTAATTGGCTC	CGAACCCTTCCCCTAAATCAGTTGCATGAGGCCAGCAGTCCATCTTTGCATTAATTGGCTC
rs2736912	chr10:124205584	GTCTCATGCAACTGATTTAGGGGAAGGGTTCGCCTAAATTAATAAAAGATCTGAATTATAG	GTCTCATGCAACTGATTTAGGGGAAGGGTTTGCCTAAATTAATAAAAGATCTGAATTATAG
rs2014307	chr10:124207622	TCATGAATAATGAACAATGAAACACCACAGATGCCAGAGCCTTAATCAGGAAACGAGGCTT	TCATGAATAATGAACAATGAAACACCACAGCTGCCAGAGCCTTAATCAGGAAACGAGGCTT
rs3793917	chr10:124209265	CCCTGAGCAGCCAGACTGCAGAGGGAATGAGCGGACCGAAAACAGTGTGGCCGCAACTTCC	CCCTGAGCAGCCAGACTGCAGAGGGAATGACCGGACCGAAAACAGTGTGGCCGCAACTTCC
rs17084601	chr4:55361343	CATTTCTTCAACTTTATGGACAAAAGACTTTCAGATGATTGCTGAAAACCAAGAAAAGCTA	CATTTCTTCAACTTTATGGACAAAAGACTTGCAGATGATTGCTGAAAACCAAGAAAAGCTA
rs6554198	chr4:55363088	GATATTTGCTGAATGAAAAACAGGAATGACGGTCCAACATGGTATAACTCCCTATTCAGTT	GATATTTGCTGAATGAAAAACAGGAATGACAGTCCAACATGGTATAACTCCCTATTCAGTT
rs6554199	chr4:55363416	GATCTGATGGCCCAGAGCACAGAGACCTTTGGTATTTCAGTTCTCCTACAGCCGCATGACT	GATCTGATGGCCCAGAGCACAGAGACCTTTTGTATTTCAGTTCTCCTACAGCCGCATGACT
rs2519148	chr9:133524120	CGCGGCTGCCACACCCCACTGGACACAGACCTATGTGGCTGAGACCGGCGCCACCCAGCCC	CGCGGCTGCCACACCCCACTGGACACAGACTTATGTGGCTGAGACCGGCGCCACCCAGCCC
rs1076153	chr9:133527697	CTCCAGTCTGCACCACCGTCGCTCCACTTGGGGTTGTCACTGCCTGAGGTTAGGACGTCAG	CTCCAGTCTGCACCACCGTCGCTCCACTTGTGGTTGTCACTGCCTGAGGTTAGGACGTCAG
rs1611114	chr9:133529757	AAGGCTGGCACTTTCTCCAAATTTCACGTTCGTGCAAAGACACAGTCATTCCTTTCTACAG	AAGGCTGGCACTTTCTCCAAATTTCACGTTTGTGCAAAGACACAGTCATTCCTTTCTACAG
rs1611115	chr9:133530069	TCCTGAAGGCAGCTGCCCTCAGTCTACTTGTGGGAGAGGACAGGAGGGAGAGGTGCCGTGG	TCCTGAAGGCAGCTGCCCTCAGTCTACTTGCGGGAGAGGACAGGAGGGAGAGGTGCCGTGG
rs1523922	chr2:225251200	TCAGTGTCTTCGTATTTGCTATTCTTTCTGTCTGAAATGTTCTTCCCTCAGTTTCCTGCAT	TCAGTGTCTTCGTATTTGCTATTCTTTCTGCCTGAAATGTTCTTCCCTCAGTTTCCTGCAT
rs4674923	chr2:225252032	TAATAATGATGGCCTCAAATACCATAGCTACGTACGTGCAATGTGGTTTTAGTTTGTTGAC	TAATAATGATGGCCTCAAATACCATAGCTATGTACGTGCAATGTGGTTTTAGTTTGTTGAC
rs7600608	chr2:225255036	ATCAAAAGCTCCAGACACAGATCAAACTTATCATGTCAAAAATCCCTGACAACTCACCATC	ATCAAAAGCTCCAGACACAGATCAAACTTACCATGTCAAAAATCCCTGACAACTCACCATC
rs222374	chrX:149524082	CTCATCCCTAAACACATCTGCACACCTCTCCTAAGACCTGATGGTTACTGTCTATAAATTT	CTCATCCCTAAACACATCTGCACACCTCTCGTAAGACCTGATGGTTACTGTCTATAAATTT
rs222375	chrX:149524727	AACTCACTGTCTCTCTTTTTGCCCTCCCAGACATTTCTGTCCCTTGGGAGTGCTCTCAGCA	AACTCACTGTCTCTCTTTTTGCCCTCCCAGTCATTTCTGTCCCTTGGGAGTGCTCTCAGCA
rs5970464	chrX:149529751	ATCTATCAAATGGACGTAGATGGGGGACTATACAATAGTATTTCTCCAAGTGCAGCAAGCC	ATCTATCAAATGGACGTAGATGGGGGACTACACAATAGTATTTCTCCAAGTGCAGCAAGCC
rs222376	chrX:149529848	AGACTGGGGCTGATTCTTGCACACTAACATTTGAGATCTGGTGAGCTGCAGAACAAAGCCC	AGACTGGGGCTGATTCTTGCACACTAACATCTGAGATCTGGTGAGCTGCAGAACAAAGCCC
rs7888480	chrX:149531547	AAGCTGGTGGGGCAGGATGGGTCTGGGATGGGCATGAGTAACTCCCTGTCTGCAGATCTGC	AAGCTGGTGGGGCAGGATGGGTCTGGGATGTGCATGAGTAACTCCCTGTCTGCAGATCTGC
rs4473484	chr22:16495404	CCACGGGCAATTTGATCTCCCTAAAACACACTGTATCCTCTCTCCTAGATACCTTCCGATA	CCACGGGCAATTTGATCTCCCTAAAACACATTGTATCCTCTCTCCTAGATACCTTCCGATA
rs7624906	chr3:188872338	TTGAATAATTGTCACTATTTCTTTTTGTGCTTGTAATCCAAGGCAAAGCGGAAATGCACAG	TTGAATAATTGTCACTATTTCTTTTTGTGCCTGTAATCCAAGGCAAAGCGGAAATGCACAG
rs3755792	chr3:188872663	GGTCTTTGGCATACCCACTGAGTAGGAAACGAGGATTTTTCCAAAGCAGGAGCCAGCCGAA	GGTCTTTGGCATACCCACTGAGTAGGAAACAAGGATTTTTCCAAAGCAGGAGCCAGCCGAA
rs2162188	chr3:188873681	TGTTACTTCACTTGAGAAAGCTTCATGATTCCCTGACTCAGAGATGCCAGAGATTCCTGGC	TGTTACTTCACTTGAGAAAGCTTCATGATTTCCTGACTCAGAGATGCCAGAGATTCCTGGC
rs2162189	chr3:188873763	ACATGCACCTCTAGAAGGCATCCAGGCCTCACCTCTTTCATGTGCAGCTTTTTCTGGACAG	ACATGCACCTCTAGAAGGCATCCAGGCCTCGCCTCTTTCATGTGCAGCTTTTTCTGGACAG
rs17728902	chr3:188873846	GTGGAACGTACATTTTGGAGTGACTACCTGCCAATATAAGGAGTAGAAACTTATTTTAATA	GTGGAACGTACATTTTGGAGTGACTACCTGGCAATATAAGGAGTAGAAACTTATTTTAATA
rs2114118	chr3:188873950	AGCAATGCAAGGAAGGAGAAAGTGTCTGTACTGGGAGTCAAGAGACCTGGGCTCTAGCCTG	AGCAATGCAAGGAAGGAGAAAGTGTCTGTATTGGGAGTCAAGAGACCTGGGCTCTAGCCTG
rs10513819	chr3:188874200	TTTTATATTGGAAAAGAACCTGGTTTTTACGTAATATCAGAAAGGAGGCTGAGTGCAGAGG	TTTTATATTGGAAAAGAACCTGGTTTTTACATAATATCAGAAAGGAGGCTGAGTGCAGAGG
rs1365113	chr3:188875430	GCTGTTCCATGTTGTTCTCCCCACTGACATTTTTCCTCACTTTCTTCTGTCTGGAAAATCA	GCTGTTCCATGTTGTTCTCCCCACTGACATGTTTCCTCACTTTCTTCTGTCTGGAAAATCA
rs16862441	chr3:188877143	TCAGCTATCTTTACTTCCTCCTCAGTGATTATGAAAATGTTAAGCACAGAGTATTTGTTGA	TCAGCTATCTTTACTTCCTCCTCAGTGATTCTGAAAATGTTAAGCACAGAGTATTTGTTGA
rs16862444	chr3:188877493	AAAGTGTAAGAGTTTTCATATTGATTGGAAGGCCAAGGGAGGAAAGATCTATTTACCACTG	AAAGTGTAAGAGTTTTCATATTGATTGGAAAGCCAAGGGAGGAAAGATCTATTTACCACTG
rs16862457	chr3:188879284	CTTGAATCTCTCTGACCAAGTGGTTGAAATACTCTTGCAAGATTGGCAATTCTTGTCCTGT	CTTGAATCTCTCTGACCAAGTGGTTGAAATGCTCTTGCAAGATTGGCAATTCTTGTCCTGT
rs9872531	chr3:188880313	TTGAGCGCTCCCTCTTGTGGCTGTCCAGGATATTGCTTCTGTGCCTGGCCAGAGCTCCCTT	TTGAGCGCTCCCTCTTGTGGCTGTCCAGGACATTGCTTCTGTGCCTGGCCAGAGCTCCCTT
rs237401	chrX:149819436	AAGGAGAAAATCTGGCTGTGAGGAGCCTCCATTGGTAGGTGGGTGGCTGGGGGGATGGGGA	AAGGAGAAAATCTGGCTGTGAGGAGCCTCCGTTGGTAGGTGGGTGGCTGGGGGGATGGGGA
rs3754509	chr1:17127806	AGGCGCCCTTCACATGTCCAAAACAAGCAGACAGAAAGGGGAAAAAAAAATCACTCCTACG	AGGCGCCCTTCACATGTCCAAAACAAGCAGGCAGAAAGGGGAAAAAAAAATCACTCCTACG
rs3754508	chr1:17128193	AGAGGGGCCCTGTTCCAGTCCTGGGTCAGCACCAGTGAAAGTCAAGGTGACCTCAGCATTG	AGAGGGGCCCTGTTCCAGTCCTGGGTCAGCGCCAGTGAAAGTCAAGGTGACCTCAGCATTG
rs3754507	chr1:17128252	GGCAGTCTTCCCATATCTCAGCCAGTTTGGGTGACCCAAGAGGCCCCATGGGGCAGACCAG	GGCAGTCTTCCCATATCTCAGCCAGTTTGGTTGACCCAAGAGGCCCCATGGGGCAGACCAG
rs12404121	chr1:17131410	TTGGTACTGTGTACCAGGTCCTATGCAGAACACTTTGGGTACATGTCCTCTCTGTAATCAT	TTGGTACTGTGTACCAGGTCCTATGCAGAATACTTTGGGTACATGTCCTCTCTGTAATCAT
rs2746543	chr1:17132186	TGCATTTCATTTGCATGGCTGTGTCTCTGACAGAAAACAGTGCTCAAAAGCCAGATTCGGC	TGCATTTCATTTGCATGGCTGTGTCTCTGATAGAAAACAGTGCTCAAAAGCCAGATTCGGC
rs12500636	chr4:17651152	TTGTTTATGTTTGTTTTAAAAAAGTAAACATGAAAAATAGCATCTTTAACATCAATTACAA	TTGTTTATGTTTGTTTTAAAAAAGTAAACAGGAAAAATAGCATCTTTAACATCAATTACAA
rs12511456	chr4:17651872	CTTGGTAAATATGTAATGAAATAAAATCTTCTGTGAAATGACAGTACTAGTTCCCATGAGT	CTTGGTAAATATGTAATGAAATAAAATCTTTTGTGAAATGACAGTACTAGTTCCCATGAGT
rs2724472	chr4:17655161	CTAAATGTAACCCTACTTTGTAACCCTACATTTACACTGTTAATTATTTACACAAGAAAAA	CTAAATGTAACCCTACTTTGTAACCCTACAATTACACTGTTAATTATTTACACAAGAAAAA
rs1894651	chr6:35372008	GGGTGACCGCTGCTTCCAGGCTCTGGCTGAATCTCAGGCCTCATGTGATTGAGCTGGGGGA	GGGTGACCGCTGCTTCCAGGCTCTGGCTGAGTCTCAGGCCTCATGTGATTGAGCTGGGGGA
rs991145	chr6:35372066	GGGTGGCTGGGTTGGAGGGGCTCTGACTACGTTTCACAAGAAAAGGCAGGAAAAGAGTTCC	GGGTGGCTGGGTTGGAGGGGCTCTGACTACATTTCACAAGAAAAGGCAGGAAAAGAGTTCC
rs4711414	chr6:35373396	CGTGGATACAGAACGAGGGTTCCCGCTCTCGGAGAGTTGGTCCCCAGTTCCCATGCAGGGA	CGTGGATACAGAACGAGGGTTCCCGCTCTCAGAGAGTTGGTCCCCAGTTCCCATGCAGGGA
rs698893	chr1:16048288	AGATATGAATCTACTTGTGGCTTCAAAGCTGCAGATCCCAGTTGTGTTTTTCTACCTTCTA	AGATATGAATCTACTTGTGGCTTCAAAGCTACAGATCCCAGTTGTGTTTTTCTACCTTCTA
rs2502805	chr1:158022914	AATCGCTAATGGGGGAGACAGACCTTTACACAGATATAAAGAAATATGGTCAGATCAGTGA	AATCGCTAATGGGGGAGACAGACCTTTACATAGATATAAAGAAATATGGTCAGATCAGTGA
rs419017	chr5:80988679	GGCCTGGAATAAGAGGGAGAATTTTTTACCGCATAACTTTTCTTTTGTTTGATTACTTCCC	GGCCTGGAATAAGAGGGAGAATTTTTTACCACATAACTTTTCTTTTGTTTGATTACTTCCC
rs17361096	chr5:80991819	GCATGAGAGTGAACAGGCAACCTACAGAATGGGAGAAAATTTTTGCAATCTACCCATCTGA	GCATGAGAGTGAACAGGCAACCTACAGAATAGGAGAAAATTTTTGCAATCTACCCATCTGA
rs2660840	chr12:94934975	CCAAATCTAGGGTGACAAATACAATAGATAACATAGAATTCATTTAGTCAAATAATACACA	CCAAATCTAGGGTGACAAATACAATAGATACCATAGAATTCATTTAGTCAAATAATACACA
rs7966262	chr12:94935547	TACCAAAGGAGACTTAAAGATGAAAAGATGATCTATATAAAATATTATGAAAAGAAATAAT	TACCAAAGGAGACTTAAAGATGAAAAGATGTTCTATATAAAATATTATGAAAAGAAATAAT
rs2540482	chr12:94937348	GCCAAAGCTTTCTTTAAAAAAAAAGCTTACGTTCATCTTTTAATCCCTTGGATTGTATGCC	GCCAAAGCTTTCTTTAAAAAAAAAGCTTACATTCATCTTTTAATCCCTTGGATTGTATGCC
rs10735340	chr12:94941458	ATTTATAGTCACATCTCCAGTCTGTTCTGCATGTCAAGAAAAGGTTTGGGACTGGGTGCGG	ATTTATAGTCACATCTCCAGTCTGTTCTGCGTGTCAAGAAAAGGTTTGGGACTGGGTGCGG
rs12451328	chr17:58950280	CCACCTTACCCTGCTCTGTCCTAGTACCTACCCCTACCCAGCCTTAACCCCTGGCTCATTC	CCACCTTACCCTGCTCTGTCCTAGTACCTAACCCTACCCAGCCTTAACCCCTGGCTCATTC
rs4968591	chr17:58951850	GGGAGCGAGCATAGGACAAACAGCACCTTTTCAGGCTCAGTGGGGGATGGGGAGGACAGGA	GGGAGCGAGCATAGGACAAACAGCACCTTTCCAGGCTCAGTGGGGGATGGGGAGGACAGGA
rs1318692	chr12:47584052	TTTTGAGAGGGTCCTTTTAACTCTCAAAAATCTGTCTCCTCAGTGCATTTTATTTATTTAT	TTTTGAGAGGGTCCTTTTAACTCTCAAAAACCTGTCTCCTCAGTGCATTTTATTTATTTAT
rs382592	chr19:62051612	AATGCCAAGGAGATTTACAAAGATGTAAAATAATGCGCCTCTTCTCAATAACCTTTGGTTT	AATGCCAAGGAGATTTACAAAGATGTAAAACAATGCGCCTCTTCTCAATAACCTTTGGTTT
rs7248098	chr19:62052669	TAATATGGTGTGTCTAATTTCATTCCTTCATATATGGATATCTAGTTTTCCCCACCCACTT	TAATATGGTGTGTCTAATTTCATTCCTTCACATATGGATATCTAGTTTTCCCCACCCACTT
rs2022498	chr20:36399507	CAGAAAGTCTCATTGTTCCAAATGTCCTTGTGATTTTCTTAGTCCAAATTCCTAATGTCAC	CAGAAAGTCTCATTGTTCCAAATGTCCTTGGGATTTTCTTAGTCCAAATTCCTAATGTCAC
rs6064420	chr20:36401730	AATATTTTGTGTACATATATTTTTAAATATAGACAGGGTTTCTCCATGTTGGCCAGAGTGG	AATATTTTGTGTACATATATTTTTAAATATGGACAGGGTTTCTCCATGTTGGCCAGAGTGG
rs1780614	chr20:36403959	TCCAAAGTACCCTGCAGAGATTCAGAACTGAAGGAATTCATAACATCATTCTCTTTCAAGA	TCCAAAGTACCCTGCAGAGATTCAGAACTGCAGGAATTCATAACATCATTCTCTTTCAAGA
rs1780615	chr20:36404533	AATCCAACTGCATTGGTTCTTGGGATTTGATTAAAGTGGCTATTTCTAGAGTTGGGGGACA	AATCCAACTGCATTGGTTCTTGGGATTTGAATAAAGTGGCTATTTCTAGAGTTGGGGGACA
rs6123609	chr20:36404995	TCAAAATCTTTTCAGTAACACTTTTGTAGTGAGAATATTATCGGTGGCGAGTCCGCAACAC	TCAAAATCTTTTCAGTAACACTTTTGTAGTCAGAATATTATCGGTGGCGAGTCCGCAACAC
rs1780616	chr20:36406356	TGCTCAATAAATATCAGTTTCTTTCCAATTCCTGCTGGGTGCTGCAAGGATCTCAGGAAAT	TGCTCAATAAATATCAGTTTCTTTCCAATTTCTGCTGGGTGCTGCAAGGATCTCAGGAAAT
rs2232571	chr20:36407498	CCAAAATAGAACCTTACTCTATGGTGCCATTGGAAACGGATGCCTCATGACATCCCTTTCC	CCAAAATAGAACCTTACTCTATGGTGCCATCGGAAACGGATGCCTCATGACATCCCTTTCC
rs2232575	chr20:36407926	GCCAGATGTAGCTTCACTCTCAACCCTGCCGTCTGCTGGGGGTGAGATCTCAAGGGAGCTA	GCCAGATGTAGCTTCACTCTCAACCCTGCCCTCTGCTGGGGGTGAGATCTCAAGGGAGCTA
rs2232578	chr20:36408129	TAGGAGTCAGGCTTCCTCATCCACTGATCTAGGCAGTGAAAACTGGCTTCTAAGTATGACC	TAGGAGTCAGGCTTCCTCATCCACTGATCTGGGCAGTGAAAACTGGCTTCTAAGTATGACC
rs1414499	chr1:16136119	TGGGTCCAGGATCCTTGGAAAGGTGTCACCTGGATCTTTCCACCCAAATCACCAGAGCCTG	TGGGTCCAGGATCCTTGGAAAGGTGTCACCCGGATCTTTCCACCCAAATCACCAGAGCCTG
rs4924402	chr15:38033046	ATGGCAGAGAGCAGGCACAAGTGCTTGTTCTCTGCAGATAGGCAGATATCAAACAGGAGGA	ATGGCAGAGAGCAGGCACAAGTGCTTGTTCCCTGCAGATAGGCAGATATCAAACAGGAGGA
rs17720604	chr15:38033218	CAAACCTGTTTAAATGGGAATGCCTATTGCGTAAGAACTCTGATAAAACTGATAGAACTGC	CAAACCTGTTTAAATGGGAATGCCTATTGCATAAGAACTCTGATAAAACTGATAGAACTGC
rs1438832	chr2:224637457	TGTTGCTGATGAGATTAATAAGACATGGTTTTTGTGAGGCTGTACAGTGTAATGACTAGAC	TGTTGCTGATGAGATTAATAAGACATGGTTCTTGTGAGGCTGTACAGTGTAATGACTAGAC
rs2736340	chr8:11381382	TTGCACCCCATCGCATTGTATATGTACCCACCAATCAGACCCATCACTAATGGTGGCCATG	TTGCACCCCATCGCATTGTATATGTACCCATCAATCAGACCCATCACTAATGGTGGCCATG
rs1478900	chr8:11385069	TTGAAAACTAGACATTGCAGTGATTCTAGACTCCATTCACTTTCCTAAAAGTTGTTGGTTT	TTGAAAACTAGACATTGCAGTGATTCTAGATTCCATTCACTTTCCTAAAAGTTGTTGGTTT
rs1478901	chr8:11385242	TCTGGCTCCCTAAAGGTGTCCTCTATTCTTGTATTATATGATGATGAGACAATTATTTAGA	TCTGGCTCCCTAAAGGTGTCCTCTATTCTTCTATTATATGATGATGAGACAATTATTTAGA
rs2736344	chr8:11388087	GCTACCACGTGGAGAAGATCAGCTTTGGGATTTAAAGCAATTAGCCACATTCACATCAGCT	GCTACCACGTGGAGAAGATCAGCTTTGGGACTTAAAGCAATTAGCCACATTCACATCAGCT
rs9694294	chr8:11388130	GCCACATTCACATCAGCTTCCAGGTATTTGCAGTTTATTATGTGCTAAATACTGTAATAGA	GCCACATTCACATCAGCTTCCAGGTATTTGGAGTTTATTATGTGCTAAATACTGTAATAGA
rs2222630	chr3:120759999	CCACGCCTGGCCCTGGAGTACATAATTTTGATAAGTAACGTCTGCAGTGTCTTTTTTTCCC	CCACGCCTGGCCCTGGAGTACATAATTTTGGTAAGTAACGTCTGCAGTGTCTTTTTTTCCC
rs6438537	chr3:120760536	AGCCACGCCATATTGTTTTATTAGCCATCATCCATTTTAGACAGGATTAGTTAAAAGAGAC	AGCCACGCCATATTGTTTTATTAGCCATCACCCATTTTAGACAGGATTAGTTAAAAGAGAC
rs16829980	chr3:120761158	CTTCTGTTACTTTACAGAGGGTTTGAGTTCACTCAGTACTTGTCAGTGCCAGGAGTTGGAC	CTTCTGTTACTTTACAGAGGGTTTGAGTTCGCTCAGTACTTGTCAGTGCCAGGAGTTGGAC
rs16829984	chr3:120761230	AGAAGCGCCCTCTGCTGCCGTCTTCTTCTAGTTGCTTTTGTAGAGGCTGTGGCTGGGGCAA	AGAAGCGCCCTCTGCTGCCGTCTTCTTCTACTTGCTTTTGTAGAGGCTGTGGCTGGGGCAA
rs1880661	chr3:120761538	ATTCAGAGGTGGGAGTAGAGTTGGGTGGTCCTGTGAGCTGAGCACTCTCCCAAAAGTGTCC	ATTCAGAGGTGGGAGTAGAGTTGGGTGGTCTTGTGAGCTGAGCACTCTCCCAAAAGTGTCC
rs16829988	chr3:120763080	CTACAATGTGTCTAGGAGCATGACCTGTGGACCACAGATTTCTAAGGTAAATTTCTGGACA	CTACAATGTGTCTAGGAGCATGACCTGTGGGCCACAGATTTCTAAGGTAAATTTCTGGACA
rs867234	chr3:120764326	ATGAACTTCTAAACCTCACGGGAGGGTCATCTTAGAACATGAAAAACTCCCCTGAAAATTT	ATGAACTTCTAAACCTCACGGGAGGGTCATGTTAGAACATGAAAAACTCCCCTGAAAATTT
rs2241486	chr4:9777352	TTAGGCATCAGAAAAAGCCCAGGGACACATCATGGTAAACTCCAATATGCCAGGAAGTGGT	TTAGGCATCAGAAAAAGCCCAGGGACACATGATGGTAAACTCCAATATGCCAGGAAGTGGT
rs2241488	chr4:9777400	GCCAGGAAGTGGTTTAGTTTTCTCACTGTGTTTCTTTTCTTGTAGGGGCATCAGAATGACG	GCCAGGAAGTGGTTTAGTTTTCTCACTGTGCTTCTTTTCTTGTAGGGGCATCAGAATGACG
rs6830786	chr4:9777712	GACGCACAGGAATCCAAGCGTAAGATTCTTCTGTGAGAGTAGCAGGTGGGTGTTGCGGGGG	GACGCACAGGAATCCAAGCGTAAGATTCTTTTGTGAGAGTAGCAGGTGGGTGTTGCGGGGG
rs16868326	chr4:9778862	CAGGGCCCATGCTGCCCCATGGAGAAGACATTGCTCTCAGGACAAGGCAGAGGGCGTCCCA	CAGGGCCCATGCTGCCCCATGGAGAAGACAATGCTCTCAGGACAAGGCAGAGGGCGTCCCA
rs12499240	chr4:9780159	ACTAGCAGCCCCAGTTTGGAAGAGAAAATTTGGGCCCAGGAAGGTGAGTTACTCAACTAAG	ACTAGCAGCCCCAGTTTGGAAGAGAAAATTCGGGCCCAGGAAGGTGAGTTACTCAACTAAG
rs717615	chr4:9780939	GAAGGATGTTTTTTTATTTACTTAGTTCTTTGACGCAGAGCTTTTCCTGTACACAGATGGG	GAAGGATGTTTTTTTATTTACTTAGTTCTTCGACGCAGAGCTTTTCCTGTACACAGATGGG
rs717614	chr4:9781057	CTCCAGGCCAGCGCTCACGTTTTATTTGTACACTGGGCCTTTGCTCTCTGCAGCCTGGGCT	CTCCAGGCCAGCGCTCACGTTTTATTTGTAGACTGGGCCTTTGCTCTCTGCAGCCTGGGCT
rs3756224	chr4:9782008	AGATACGTAGGCAAGTGGTATGCTTCTGCGGTTTTCTTCACGGTTTTAGCTTCAGTGTTTC	AGATACGTAGGCAAGTGGTATGCTTCTGCGATTTTCTTCACGGTTTTAGCTTCAGTGTTTC
rs3756223	chr4:9782066	GGAGAACGAATTAAAGTAACATGAAATTCTATCACCCAGAGATAGGTAGGCAGGCAGTAGA	GGAGAACGAATTAAAGTAACATGAAATTCTGTCACCCAGAGATAGGTAGGCAGGCAGTAGA
rs4697922	chr4:9786874	GAGTGGGGAAGGTTCACACTTGATTCACCATAGCAGCTGCCAAATACCGACAAAGACCAGA	GAGTGGGGAAGGTTCACACTTGATTCACCACAGCAGCTGCCAAATACCGACAAAGACCAGA
rs747051	chr2:176692638	GCTGCGGAGGCCACAAACACAAGATCCTAACCTCCCGGCCGACCCGCCCCAACAACTACCC	GCTGCGGAGGCCACAAACACAAGATCCTAATCTCCCGGCCGACCCGCCCCAACAACTACCC
rs6706026	chr2:176696750	CAAATAACTGACCCTAGGTGGTTAGAATTTAGAGCTTATATACCATCTTAATAGGGGACAA	CAAATAACTGACCCTAGGTGGTTAGAATTTGGAGCTTATATACCATCTTAATAGGGGACAA
rs935491	chr2:176698767	GTAATGTCTTTCTCTGAATTTGGTATCAAAATATGCTAGCTACCTTCATTAAATGAGTTGG	GTAATGTCTTTCTCTGAATTTGGTATCAAATTATGCTAGCTACCTTCATTAAATGAGTTGG
rs3116565	chr2:176700021	TTATGGGAGGAAAAGAAAACGAATATATATCTTATCAGGCAAAAATATTTTGGGTAGCTCA	TTATGGGAGGAAAAGAAAACGAATATATATTTTATCAGGCAAAAATATTTTGGGTAGCTCA
rs2360945	chr2:176700950	GGGCAGGAAATCTGTCTTTTATATTTTATGCTTTGTGAAATACCATGCACTCTTATGACTC	GGGCAGGAAATCTGTCTTTTATATTTTATGTTTTGTGAAATACCATGCACTCTTATGACTC
rs6735296	chr2:58380411	CCCTTTCGATGATTCTGTTTTACTTTATTGAAAGACTGTTACAACTTTGGTGTTGCATTTC	CCCTTTCGATGATTCTGTTTTACTTTATTGTAAGACTGTTACAACTTTGGTGTTGCATTTC
rs4395240	chr2:58381151	GTGGTTCTCAAAACGTGATCCTAGAACCTAGCAACAGCATCACCTGGGAACTATGTAGAAA	GTGGTTCTCAAAACGTGATCCTAGAACCTACCAACAGCATCACCTGGGAACTATGTAGAAA
rs2192690	chr2:58381993	AGAAAGGGTAGAAGTTCCATGGGGGAAAGTGTGGTGGTGGGGAAGTTTAACATACTGGATA	AGAAAGGGTAGAAGTTCCATGGGGGAAAGTTTGGTGGTGGGGAAGTTTAACATACTGGATA
rs17049425	chr2:58382565	AAATCTATAATTGAAGAAATCCAATGACCAAGGAACAAGGTAAGATACCATATAAAAACTT	AAATCTATAATTGAAGAAATCCAATGACCAGGGAACAAGGTAAGATACCATATAAAAACTT
rs12713377	chr2:58383761	GTAGTGAATAATTTTTCAGCCTTGAAAAGACCATATCCATAAGAAATAAACTACAAAGACT	GTAGTGAATAATTTTTCAGCCTTGAAAAGAGCATATCCATAAGAAATAAACTACAAAGACT
rs17049429	chr2:58385931	TACTCTATATGACGAATTTTCAGACTGAAGGTCCAATATGATCACTGTAATTCCAAAGATA	TACTCTATATGACGAATTTTCAGACTGAAGATCCAATATGATCACTGTAATTCCAAAGATA
rs13411119	chr2:58389830	CTACAGTAGAGTCTGTTAAGTGCTAATCAAGCTCATTTCCTTTTCCTCTTGGGCCCATAGC	CTACAGTAGAGTCTGTTAAGTGCTAATCAAACTCATTTCCTTTTCCTCTTGGGCCCATAGC
rs732286	chr1:16089666	CTTCTCCATGGGCGGGTCCTGGGCCGGGAGAGCACGGGAGGCCGAGGAGGAGGTGGAAGAG	CTTCTCCATGGGCGGGTCCTGGGCCGGGAGGGCACGGGAGGCCGAGGAGGAGGTGGAAGAG
rs945416	chr1:16089708	CGAGGAGGAGGTGGAAGAGGAGGAGGAAGAGGAAGAGGAATGGAAACTTCTCTCCGCTCGG	CGAGGAGGAGGTGGAAGAGGAGGAGGAAGAAGAAGAGGAATGGAAACTTCTCTCCGCTCGG
rs3738640	chr1:16089772	CCCTCGCCCGCCTGGGCAGGGCCCGGCGCCGTCCGTGGATGAGCCACAGAACCTCTTCCAC	CCCTCGCCCGCCTGGGCAGGGCCCGGCGCCATCCGTGGATGAGCCACAGAACCTCTTCCAC
rs1572381	chr1:16089800	GCCTGCGCCCACACCCTCTCCTGTCCAGCCCTCGCCCGCCTGGGCAGGGCCCGGCGCCGTC	GCCTGCGCCCACACCCTCTCCTGTCCAGCCTTCGCCCGCCTGGGCAGGGCCCGGCGCCGTC
rs945417	chr1:16089931	GCCCCTTGTCTACTAGCTAAATTTAGGCCTCTCCATGGCCCAGAGGGGGCTGGAAATCTTC	GCCCCTTGTCTACTAGCTAAATTTAGGCCTGTCCATGGCCCAGAGGGGGCTGGAAATCTTC
rs872222	chr1:16089970	GCCTGCGTGTCGGGCTGTCAGCAGGGCCGGCGCACGGGAGAAGATTTCCAGCCCCCTCTGG	GCCTGCGTGTCGGGCTGTCAGCAGGGCCGGTGCACGGGAGAAGATTTCCAGCCCCCTCTGG
rs945418	chr1:16090036	GGGCTGAGCTCACAGCCTGACATTCCAGGCTGATCACAGCAGCCCCAGGGGCCTCCTCACC	GGGCTGAGCTCACAGCCTGACATTCCAGGCCGATCACAGCAGCCCCAGGGGCCTCCTCACC
rs1056207	chr1:16090133	GGGGAAACAAAACACACAATAAACCCCAAACTTGCAAGGTTCTGGGGCAGGCACCGAGGTC	GGGGAAACAAAACACACAATAAACCCCAAATTTGCAAGGTTCTGGGGCAGGCACCGAGGTC
rs945419	chr1:16090164	TTTGGGGTTTATTGTGTGTTTTGTTTCCCCCGTCAGCCTGGGGGCTCCTGAGGACTGTGCC	TTTGGGGTTTATTGTGTGTTTTGTTTCCCCTGTCAGCCTGGGGGCTCCTGAGGACTGTGCC
rs3754331	chr1:16090454	GAAAGCTGCCAACTTTGTCCTCTTGGGGCTGCTGAATGTTCTGAGAGTCAGAGGGAGTGCA	GAAAGCTGCCAACTTTGTCCTCTTGGGGCTACTGAATGTTCTGAGAGTCAGAGGGAGTGCA
rs945420	chr1:16090514	CTCCTTAAAGGTCTAGAAGGTTGTGTTCCCGGCAACTGTCTGCTCCATCTCTGTGTCAGAG	CTCCTTAAAGGTCTAGAAGGTTGTGTTCCCAGCAACTGTCTGCTCCATCTCTGTGTCAGAG
rs3754329	chr1:16090561	CTTTTACCTCTGACTGAAATCCCACCTAAGGCGCTCGCAGGCATCACCTCTGACACAGAGA	CTTTTACCTCTGACTGAAATCCCACCTAAGTCGCTCGCAGGCATCACCTCTGACACAGAGA
rs945422	chr1:16090925	CTCCCTACCCACCTGCTTGCTCAGCAAAGCTGGGACTGACCTTGCCCTGGGCCAGGGTGGA	CTCCCTACCCACCTGCTTGCTCAGCAAAGCCGGGACTGACCTTGCCCTGGGCCAGGGTGGA
rs1544131	chr1:16091041	GGGGAGGAGGCATTGGAGCTGATCTGGGACGGAAGGGACGGATTTGGAGAGGACAGCAGAG	GGGGAGGAGGCATTGGAGCTGATCTGGGACAGAAGGGACGGATTTGGAGAGGACAGCAGAG
rs1544130	chr1:16091484	AGCCAGGCTGGGTGTCACAGGCCCCGACACGGGCAGGAAACTCTGCCAGAGGCAACAGGCC	AGCCAGGCTGGGTGTCACAGGCCCCGACACCGGCAGGAAACTCTGCCAGAGGCAACAGGCC
rs2009594	chr1:16092230	GAGCTGTGCTGGCTTCAAACCGGTCATCCTGCTGAGCCACCCTGGCTGCCCTCTTCTCAGC	GAGCTGTGCTGGCTTCAAACCGGTCATCCTACTGAGCCACCCTGGCTGCCCTCTTCTCAGC
rs10737912	chr1:16093248	CCGTGATCTTAGACAGGCAGCCCCAGCTCCCTGAGACACCATTTCTCTACAACGGGATCAC	CCGTGATCTTAGACAGGCAGCCCCAGCTCCTTGAGACACCATTTCTCTACAACGGGATCAC
rs1889785	chr1:16094035	TGGCTCCGACTCTCCCTGCCAATCTCGGAGCACCCTCCTTTCTCCCCGACAGCTCAGGTCA	TGGCTCCGACTCTCCCTGCCAATCTCGGAGTACCCTCCTTTCTCCCCGACAGCTCAGGTCA
rs708110	chr1:224497540	TCAAGGTCCTGGCTCTCAGGCCATACAAGGAGATGTTCATGCAGGACAGGTGACCCTCAAA	TCAAGGTCCTGGCTCTCAGGCCATACAAGGTGATGTTCATGCAGGACAGGTGACCCTCAAA
rs697761	chr1:224499132	GGTACCTGCCTGTACCACGTGGGGCTCCTCCTTCCCTCTGTGAGCCTCCGAGAGCCTCGGC	GGTACCTGCCTGTACCACGTGGGGCTCCTCTTTCCCTCTGTGAGCCTCCGAGAGCCTCGGC
rs708112	chr1:224499187	GAGCCAGGGTAGGCTGCATGGAGGAACGAGCGGAGGCTTCTGGAACTAGCTCCTCGGTACC	GAGCCAGGGTAGGCTGCATGGAGGAACGAGTGGAGGCTTCTGGAACTAGCTCCTCGGTACC
rs3779456	chr7:26987797	TTGCCTCTACTTCCAGTATCCACAGATTTTTCCCCAAAATGCAGTGGTTGTTCCCTAGCCC	TTGCCTCTACTTCCAGTATCCACAGATTTTCCCCCAAAATGCAGTGGTTGTTCCCTAGCCC
rs6949451	chr7:26988281	TCCCCTCCCCTCTTCCCCTCCCTCCCATACCCTCAGCTAGGGCAGTCCTTGCTCCTGCAGT	TCCCCTCCCCTCTTCCCCTCCCTCCCATACTCTCAGCTAGGGCAGTCCTTGCTCCTGCAGT
rs6970537	chr7:26990599	GGGTCGGCTTCCAAGCACTTTTCCTCCCTCGTGCTCATTTGCCTTCTTTCTTTTTTGCCAT	GGGTCGGCTTCCAAGCACTTTTCCTCCCTCATGCTCATTTGCCTTCTTTCTTTTTTGCCAT
rs7806799	chr7:26990986	CCTGAGATCGAAACTGCTAGTAAACAATTTATATCTGGAGGGCACTCTCAATGCTTTCAAG	CCTGAGATCGAAACTGCTAGTAAACAATTTGTATCTGGAGGGCACTCTCAATGCTTTCAAG
rs1859164	chr7:26991659	AGAAAAAGATGTGGGAAACTAATGGAAAAATAGTAGAAAAAATTAAATATAGGAGAAAGAG	AGAAAAAGATGTGGGAAACTAATGGAAAAACAGTAGAAAAAATTAAATATAGGAGAAAGAG
rs4736640	chr8:134265219	GGTCCTGGGGCAACAGGGGTGAAATTGAAATCTGGACACAGAGCCCTGGCTGAGTCCCCCA	GGTCCTGGGGCAACAGGGGTGAAATTGAAAGCTGGACACAGAGCCCTGGCTGAGTCCCCCA
rs2013146	chr8:134272174	GTATCTCCTCGGACATCCTGCACCCTCCCATGCTCCCCCCTCCCTACAGTAGTGAAAGACC	GTATCTCCTCGGACATCCTGCACCCTCCCACGCTCCCCCCTCCCTACAGTAGTGAAAGACC
rs1428922	chr19:47071620	TTTTTCTGATGTTTGTGCTGTTTCTGAGACGGCCTTATGACACCTTCCCCTATTCTGTAGC	TTTTTCTGATGTTTGTGCTGTTTCTGAGACAGCCTTATGACACCTTCCCCTATTCTGTAGC
rs1859166	chr7:26944828	GAGGGAGAGGAGACTGTTGCCTGCTATTTGGTAATTGAAATTTGATGGGTACACTAATTAC	GAGGGAGAGGAGACTGTTGCCTGCTATTTGATAATTGAAATTTGATGGGTACACTAATTAC
rs6973182	chr7:26945561	TAGACTGGAGGAAAAATTTAGAATGTGATACATCTACCTGAACCAATATCTCTCCCTAGCA	TAGACTGGAGGAAAAATTTAGAATGTGATATATCTACCTGAACCAATATCTCTCCCTAGCA
rs4719884	chr7:26945811	TAAAACACAAAATTCTGTTGTTTAGCCTCAGAACCTTGTACCAAGTTTCTATTTTTAAGTA	TAAAACACAAAATTCTGTTGTTTAGCCTCAAAACCTTGTACCAAGTTTCTATTTTTAAGTA
rs12533947	chr7:26948535	GTACTAAAAAGACAAAAAACCGGCCAATCAGAATCCCTCTTTTCAAATAAAGGAGGTTTCC	GTACTAAAAAGACAAAAAACCGGCCAATCAAAATCCCTCTTTTCAAATAAAGGAGGTTTCC
rs6976129	chr7:26950986	ACACATAACATTATAAAAGAGAACCCATACCCATGTAGAGTTTATATCCTTGTTCCCACTA	ACACATAACATTATAAAAGAGAACCCATACTCATGTAGAGTTTATATCCTTGTTCCCACTA
rs17471520	chr7:26952030	AGCGGAAGAAAAGAAAGCGCTTTAACCCCTTTCAATTAGCCTGGGGATTCAAAGACTAAAG	AGCGGAAGAAAAGAAAGCGCTTTAACCCCTCTCAATTAGCCTGGGGATTCAAAGACTAAAG
rs17500821	chr7:26952030	AGCGGAAGAAAAGAAAGCGCTTTAACCCCTTTCAATTAGCCTGGGGATTCAAAGACTAAAG	AGCGGAAGAAAAGAAAGCGCTTTAACCCCTCTCAATTAGCCTGGGGATTCAAAGACTAAAG
rs7119498	chr11:10419684	TCCCAGGACCTTTGCACATGCCATTCCCCATGTCTCCTCCCTCATATCCTGACGAAGGTTG	TCCCAGGACCTTTGCACATGCCATTCCCCACGTCTCCTCCCTCATATCCTGACGAAGGTTG
rs9971562	chr11:10421235	CATCATAAGCTTTCATCATGTTCATTTAGATAGGGATCTGAACTTTGCCATAGGTGACTGG	CATCATAAGCTTTCATCATGTTCATTTAGACAGGGATCTGAACTTTGCCATAGGTGACTGG
rs735621	chr17:59414450	GCATCCGGGTGGCCCACTTCCCAAATTCCTGTGTTCCTGCTATGGCCCAGCTCCAGGAGTG	GCATCCGGGTGGCCCACTTCCCAAATTCCTATGTTCCTGCTATGGCCCAGCTCCAGGAGTG
rs2073872	chr9:133419670	GGAGCACCCACAAGAGGGTTTAAATGCCCTTGACGGAGGCGGGGATGTGCGTGCACGTGTC	GGAGCACCCACAAGAGGGTTTAAATGCCCTGGACGGAGGCGGGGATGTGCGTGCACGTGTC
rs17150637	chr9:133425346	CTGGCCCCGGGCTACCCTTTGGGCTCAGAGCAAAGCACGTGCAGCCCTTCCTTTCTCCACC	CTGGCCCCGGGCTACCCTTTGGGCTCAGAGGAAAGCACGTGCAGCCCTTCCTTTCTCCACC
rs8025865	chr15:22612164	CTCAGGTGATGAATGGACACATGGGAGTGTATGAAAAAGCAGCTTCCTTATTTATTCACGA	CTCAGGTGATGAATGGACACATGGGAGTGTCTGAAAAAGCAGCTTCCTTATTTATTCACGA
rs8029703	chr15:22612392	AGAAAGCCCATATTCAAACATCCTATGGCACTGTTATCTGCAGGATCCCACTAAAGCCATT	AGAAAGCCCATATTCAAACATCCTATGGCAGTGTTATCTGCAGGATCCCACTAAAGCCATT
rs7170564	chr15:22613215	TTTTGTTGCCCATTGCAAGCCTAAAAGCCACAGAATAGATATTGTCATGGTCATAGGTGAG	TTTTGTTGCCCATTGCAAGCCTAAAAGCCAGAGAATAGATATTGTCATGGTCATAGGTGAG
rs17114774	chr15:22614490	TGAAAGAGACATAAGTACATATGGACAAAAGGGACCCATCTCAAATGACAAGAGGGTCAAT	TGAAAGAGACATAAGTACATATGGACAAAAAGGACCCATCTCAAATGACAAGAGGGTCAAT
rs7171320	chr15:22615576	TCAATTACATTTTTTTCTAACTCTACAGAATACTACAACTCCAGCACAAACATTGAACTAC	TCAATTACATTTTTTTCTAACTCTACAGAACACTACAACTCCAGCACAAACATTGAACTAC
rs7166784	chr15:22615658	CCCCTTAATGGATTTCCTGAACCATTGCTTATAAAATTATCTCTGTAGTTTAATACAAAGA	CCCCTTAATGGATTTCCTGAACCATTGCTTGTAAAATTATCTCTGTAGTTTAATACAAAGA
rs6427353	chr1:153922697	CTGTCTATATATTCTTTGCATCTTGTGCATGGTACCTAGAACGGCAACTTACATGTAGATA	CTGTCTATATATTCTTTGCATCTTGTGCATAGTACCTAGAACGGCAACTTACATGTAGATA
rs7544727	chr1:153926102	CCTTTCCTTGAAGCCTAATGATGATGTCATGACTTTGCCCAGCAAACTAGTCAATGTTTTT	CCTTTCCTTGAAGCCTAATGATGATGTCATTACTTTGCCCAGCAAACTAGTCAATGTTTTT
rs6679296	chr1:153930700	TATGGCAATTAGGTGTAAAAGGTAAAGGACAATAATTTATAATGTAGCTGAGAACAGAAAG	TATGGCAATTAGGTGTAAAAGGTAAAGGACTATAATTTATAATGTAGCTGAGAACAGAAAG
rs382427	chr5:112215335	CTAAAGAAAAGGATCCTCTGAGAAACGTCCTTTCACAGAATCCACCTTTTTAAAAGGAAGT	CTAAAGAAAAGGATCCTCTGAGAAACGTCCCTTCACAGAATCCACCTTTTTAAAAGGAAGT
rs374613	chr5:112219971	CCAAATATGAAGTTTTTAAATGCTTATGCTTGTGGAAAGGCAGACTGAATTAAAGGAGGAT	CCAAATATGAAGTTTTTAAATGCTTATGCTCGTGGAAAGGCAGACTGAATTAAAGGAGGAT
rs460137	chr5:112224848	CAAACAGGCGATGAGAAATCGCGGACGCGGAACCATTTCTTGGGCAGGACTTCCGGCGGAA	CAAACAGGCGATGAGAAATCGCGGACGCGGCACCATTTCTTGGGCAGGACTTCCGGCGGAA
rs4373502	chr8:134384423	CATCTAAATCATAGGTTCTGCCTTATTAGGGCTTTCATTGATCCTGTTGCCTGCCAAGTTC	CATCTAAATCATAGGTTCTGCCTTATTAGGCCTTTCATTGATCCTGTTGCCTGCCAAGTTC
rs2495622	chrX:117634874	AGCAGAAAGGAGAACAACAGAAGCGGAACCTCAAGAGACAAGGGAACTGTAAAGATGAAAG	AGCAGAAAGGAGAACAACAGAAGCGGAACCGCAAGAGACAAGGGAACTGTAAAGATGAAAG
rs2254586	chrX:117637386	CCCTGTCCCTGGCTGCCAACACCTCAAATATTCTTTCCTGGGCCTTCTTACCTCCAGACAA	CCCTGTCCCTGGCTGCCAACACCTCAAATAGTCTTTCCTGGGCCTTCTTACCTCCAGACAA
rs2495626	chrX:117640800	CCAAAGTGAAAGAAAGGCCACTGGTAGTCTCGCACCCAAGTCATCAGGACTCTAAGGGTTA	CCAAAGTGAAAGAAAGGCCACTGGTAGTCTTGCACCCAAGTCATCAGGACTCTAAGGGTTA
rs2495637	chrX:117641961	GCAGCTTTCTGTTAGCAGAGCTTGCTTTTGGTGAGTGTCTTCAACAGTTCCTGGAACAATT	GCAGCTTTCTGTTAGCAGAGCTTGCTTTTGATGAGTGTCTTCAACAGTTCCTGGAACAATT
rs6603441	chrX:117643203	AGTGGGCGGCGACGTGGTGGAAGAAGTTTTGTTCGGTCAGAGACCGGACGCGGGAGCTGCG	AGTGGGCGGCGACGTGGTGGAAGAAGTTTTTTTCGGTCAGAGACCGGACGCGGGAGCTGCG
rs5917632	chrX:38415899	GTTCAGGAATTTCTGGTCACTTTTAAAATGTCATTCCCCCCCCCCAAAAAAAAACTATCCA	GTTCAGGAATTTCTGGTCACTTTTAAAATGCCATTCCCCCCCCCCAAAAAAAAACTATCCA
rs1011777	chrX:123200239	TTGAAAATTTCATACCTTTACCACTACAATTCCTGATATCGTCTAGACAGTTTTGTAACTT	TTGAAAATTTCATACCTTTACCACTACAATACCTGATATCGTCTAGACAGTTTTGTAACTT
rs5911814	chrX:123200825	GATAAAGAGAGGCGGAAAGAAGATTCTGTCGCGATCCAAAGGCAACTGGTTGATGAGGCCA	GATAAAGAGAGGCGGAAAGAAGATTCTGTCACGATCCAAAGGCAACTGGTTGATGAGGCCA
rs990545	chrX:123205397	GAAGGAAGAGGGAGAAGAAGAACTTGCCCAGAGTTCACTGTTCATCTACTATGTCTGATTC	GAAGGAAGAGGGAGAAGAAGAACTTGCCCAAAGTTCACTGTTCATCTACTATGTCTGATTC
rs7357894	chrX:123205534	CAGAGCTCTTGGTCCTTTCATTTTGTCAGTGTGTTTTTGCCCTACGTAGTGGGTCCACATA	CAGAGCTCTTGGTCCTTTCATTTTGTCAGTATGTTTTTGCCCTACGTAGTGGGTCCACATA
rs1003349	chr14:22375503	TTAGAGGTGTTTTTTTTTTTTTTCCTTCCAGTTCTTGGTTGTAATTGGATTCAGGCTAAAA	TTAGAGGTGTTTTTTTTTTTTTTCCTTCCATTTCTTGGTTGTAATTGGATTCAGGCTAAAA
rs3760572	chr18:59241810	GTCCTCTTCTCTCTTCACCTCTGCTCATCTAACTCTCTTCTTGAGCTTCAGCTATCAATAG	GTCCTCTTCTCTCTTCACCTCTGCTCATCTTACTCTCTTCTTGAGCTTCAGCTATCAATAG
rs4941199	chr18:59245354	GCTCTCATCACACTTTGGACCTTGAATTGCCCTTAAATCACACATGCCAAGTGCCTAACAC	GCTCTCATCACACTTTGGACCTTGAATTGCTCTTAAATCACACATGCCAAGTGCCTAACAC
rs1912108	chr18:59248451	ATGCAGGTTGATTTTGGCAGACACTTTGTTTCTAATAGATCATCTACCTGTTCTCTGAGGG	ATGCAGGTTGATTTTGGCAGACACTTTGTTGCTAATAGATCATCTACCTGTTCTCTGAGGG
rs7504474	chr18:59248735	CTTTTATTGTCTCACAGTTTCTGTGGATCGAGAAGCCAGGCCCAGCTTAGCTATGTTGTGT	CTTTTATTGTCTCACAGTTTCTGTGGATCGGGAAGCCAGGCCCAGCTTAGCTATGTTGTGT
rs1509475	chr18:59249995	AATTATAGTCTACATTAGTTGTTCATTGTCCGATTTGATTGCTAAATCAAGTCAACAAGAT	AATTATAGTCTACATTAGTTGTTCATTGTCTGATTTGATTGCTAAATCAAGTCAACAAGAT
rs7249520	chr19:8352056	GCAGGGGGAGAAGAAAAACACACCAAAATCGTGGGTGGTTTTGTCTTTCAGATGGGAAACA	GCAGGGGGAGAAGAAAAACACACCAAAATCATGGGTGGTTTTGTCTTTCAGATGGGAAACA
rs7254882	chr19:8359822	TTAATTGCTTAACTCTCATAATTGGCCATGTGTGGTGAAAATGCCTGTAATCCCAGCACTT	TTAATTGCTTAACTCTCATAATTGGCCATGCGTGGTGAAAATGCCTGTAATCCCAGCACTT
rs3848531	chr19:52050519	CTGGAATTACAGTCGCGAGCCAGCGCGCCCGGCCTCAATTTTAAACGTTTATAAAGATAGA	CTGGAATTACAGTCGCGAGCCAGCGCGCCCAGCCTCAATTTTAAACGTTTATAAAGATAGA
rs1548888	chr2:70961150	CTGAGGTGACCAGGTTCTCAAGACTAACTCCAAAGAATCTGATGGAGCAGGCTGGGGCCAA	CTGAGGTGACCAGGTTCTCAAGACTAACTCAAAAGAATCTGATGGAGCAGGCTGGGGCCAA
rs4852228	chr2:70961530	TCACTTTGGAAAGTCTAATTACATATTACACCATCATAGCAACTCTTAAACAAACTCACAA	TCACTTTGGAAAGTCTAATTACATATTACATCATCATAGCAACTCTTAAACAAACTCACAA
rs7575872	chr2:70961799	AGCTTTGGCCCAGGAGGAGCCTGTGCCATGCGTGGCTGATGTCAACCCGGCAAGCAAGTCG	AGCTTTGGCCCAGGAGGAGCCTGTGCCATGTGTGGCTGATGTCAACCCGGCAAGCAAGTCG
rs10168115	chr2:70962115	AGATCCCAGTGGTGTCTGCCAGACTCCTTCACCGCCACATAGAATGGGATGGAAGCTGCTG	AGATCCCAGTGGTGTCTGCCAGACTCCTTCTCCGCCACATAGAATGGGATGGAAGCTGCTG
rs10192228	chr2:70962316	GCTGAGGGAACCTCGAAGGCAGAACTCTACGGATCCCTTGCCCAACTGGAAGGTCAGAGTC	GCTGAGGGAACCTCGAAGGCAGAACTCTACAGATCCCTTGCCCAACTGGAAGGTCAGAGTC
rs13389680	chr2:70963037	CTGATTTTACACCCTACAAAATACAGCAACAACAATTCAACACATTTACAGGCCTGAATGC	CTGATTTTACACCCTACAAAATACAGCAACGACAATTCAACACATTTACAGGCCTGAATGC
rs12991771	chr2:70965034	GAGTCTATGCTGGCAGGAGGAATGCTCCAATAACGGCAGCACTAAATCTAGTCTGAGCTCT	GAGTCTATGCTGGCAGGAGGAATGCTCCAAGAACGGCAGCACTAAATCTAGTCTGAGCTCT
rs13015834	chr2:70965058	CTCCAATAACGGCAGCACTAAATCTAGTCTGAGCTCTGAAAAAACACCAGGACAAATCAAA	CTCCAATAACGGCAGCACTAAATCTAGTCTAAGCTCTGAAAAAACACCAGGACAAATCAAA
rs11684466	chr2:70965849	CACCTCACACCACACTCCAGCTAGACTGGAGTTCTCTTGGTGCCTCAGGCCTGTCACACTC	CACCTCACACCACACTCCAGCTAGACTGGACTTCTCTTGGTGCCTCAGGCCTGTCACACTC
rs11126298	chr2:70966077	GAAAACACACTGAGTTTATCATAAATTGGGTAGCCTGTGTTTTCTCCCCCAAAAACAGAGA	GAAAACACACTGAGTTTATCATAAATTGGGCAGCCTGTGTTTTCTCCCCCAAAAACAGAGA
rs1544652	chr2:70966754	TTTCAAGAGTATTTTATTGCAACATTGAAAGAGGGCATGTCAAGCATTGTTAGCCTGCCAA	TTTCAAGAGTATTTTATTGCAACATTGAAACAGGGCATGTCAAGCATTGTTAGCCTGCCAA
rs1544653	chr2:70966925	AAAATCCCCAGAATTTCACAAGAAATACTGTGGGGTCCATGATACGAGGAGCTGCCCAGGT	AAAATCCCCAGAATTTCACAAGAAATACTGCGGGGTCCATGATACGAGGAGCTGCCCAGGT
rs2075223	chr2:70967111	AGGCATGCATACAGTGGGGGAGGGAGCCAAAGTCACAAGACAAAGCAAAGCGACAGGTGTC	AGGCATGCATACAGTGGGGGAGGGAGCCAAGGTCACAAGACAAAGCAAAGCGACAGGTGTC
rs2075224	chr2:70967212	TGTTGGGTTCAGGCTGGGGCACAGACTCCAGATAAAAACACATCCTCACTGACTCAGGCTC	TGTTGGGTTCAGGCTGGGGCACAGACTCCACATAAAAACACATCCTCACTGACTCAGGCTC
rs6753437	chr2:70967253	ATCCTCACTGACTCAGGCTCTTTCAGTTTCAAGAAAAAGCAATGGTTGGGGTCAGGAGCAC	ATCCTCACTGACTCAGGCTCTTTCAGTTTCGAGAAAAAGCAATGGTTGGGGTCAGGAGCAC
rs6725094	chr2:70967404	CCTTCAGGCTGCCCTCCGGGACCTCCATTGCGACTCCTCTGAGCCGTTCTCTTTTCTCTGC	CCTTCAGGCTGCCCTCCGGGACCTCCATTGTGACTCCTCTGAGCCGTTCTCTTTTCTCTGC
rs10193839	chr2:70967768	ACCATGCCAGGCCTGTATTCATGTCTTTCCCCTGCCTCATAGCTTCTGCTCATTGCTAGTT	ACCATGCCAGGCCTGTATTCATGTCTTTCCTCTGCCTCATAGCTTCTGCTCATTGCTAGTT
rs1544649	chr2:70968478	AGCAGCACGTGGTATTTCAGGTCTTACAATACAAGCCTGTGCCCTCAGCTGTGACCCATTT	AGCAGCACGTGGTATTTCAGGTCTTACAATGCAAGCCTGTGCCCTCAGCTGTGACCCATTT
rs1544650	chr2:70968570	TATTTAAGGAAGCATCTTTTCCTGAGGACCTTAATGAAGACCTGTGCTCACTCCACCCTCC	TATTTAAGGAAGCATCTTTTCCTGAGGACCCTAATGAAGACCTGTGCTCACTCCACCCTCC
rs1548893	chr2:70968607	AGACCTGTGCTCACTCCACCCTCCTCTCCTCTCTGTGGTGGCTGCTGCCTGGATTCCAGCT	AGACCTGTGCTCACTCCACCCTCCTCTCCTGTCTGTGGTGGCTGCTGCCTGGATTCCAGCT
rs1544651	chr2:70968736	TGCTGAGACTTGTTCTTGGGAATTGAGCTATAGACTAGAAGATTGTGCAGTAAACAAGAAG	TGCTGAGACTTGTTCTTGGGAATTGAGCTAGAGACTAGAAGATTGTGCAGTAAACAAGAAG
rs2652072	chr5:134767194	CTGGGCGTGGTATGCGGGCCTGTAACTGCATCTAGTCAGGAAGCTGAGGCAGTTAATGCCC	CTGGGCGTGGTATGCGGGCCTGTAACTGCACCTAGTCAGGAAGCTGAGGCAGTTAATGCCC
rs2617255	chr5:134768047	AGCTCTTAAAGGTTAGTAGTTATGTAGAATCTGAAAACATCACTAACTTTTCATACTCTGT	AGCTCTTAAAGGTTAGTAGTTATGTAGAATTTGAAAACATCACTAACTTTTCATACTCTGT
rs2617254	chr5:134772084	CAGGGAGAGGGAGAGGGAGAGGGAGAGGGACGCCTAACTCATTTTTGACAAAGGTGCAAAA	CAGGGAGAGGGAGAGGGAGAGGGAGAGGGATGCCTAACTCATTTTTGACAAAGGTGCAAAA
rs940656	chr1:200805809	CGCCTGTGGGTTGGTGGGGTTCAGAGGGGCCGTGACAGGGCTGGTTGTGGGGAGGAGAGAG	CGCCTGTGGGTTGGTGGGGTTCAGAGGGGCTGTGACAGGGCTGGTTGTGGGGAGGAGAGAG
rs878364	chr1:200805900	GGTATAGAGAGGCACCCGCCTCCATGGAGGGACAGTGGCTCAAAGCATGGCGCTTATATGA	GGTATAGAGAGGCACCCGCCTCCATGGAGGAACAGTGGCTCAAAGCATGGCGCTTATATGA
rs12563446	chr1:200806189	CGCCCCAGCTGGCTGAAGGCCTCTGACTCTGTATAATCTCTTTTTTTTTTGAGACAGAGTC	CGCCCCAGCTGGCTGAAGGCCTCTGACTCTATATAATCTCTTTTTTTTTTGAGACAGAGTC
rs4951304	chr1:200806960	ATCCAAAAAGTATGGAAAGTGTTTCTTATCCGACCCAAGGTAAAAAGAAAAGGAAATGGAA	ATCCAAAAAGTATGGAAAGTGTTTCTTATCTGACCCAAGGTAAAAAGAAAAGGAAATGGAA
rs2250538	chr1:200813549	GGCACACTCACAGAAAGGGCAAGCTTACTTGTGAACCCACAGAAAAATCAGCAAAGCCTCT	GGCACACTCACAGAAAGGGCAAGCTTACTTATGAACCCACAGAAAAATCAGCAAAGCCTCT
rs2293336	chr1:200813659	GACAGAGTGAGCTGAGGTGAGTCCCCAGTCGTAAACTTCTGCCCAGAGGCAGTGACCCTAC	GACAGAGTGAGCTGAGGTGAGTCCCCAGTCATAAACTTCTGCCCAGAGGCAGTGACCCTAC
rs1957373	chr14:22305537	CGATGATAGCTAACCCAGCTCTTCAACTTCCTTTCAATCTCCAGAAAAGGCTCTCTGCGTG	CGATGATAGCTAACCCAGCTCTTCAACTTCTTTTCAATCTCCAGAAAAGGCTCTCTGCGTG
rs2071801	chr3:50372246	GCAAGTGTGGGGGCTAGAGCTGTGTTGCTTCCCGAACCCTCACCGCCGCTTTCAGGGGTTA	GCAAGTGTGGGGGCTAGAGCTGTGTTGCTTGCCGAACCCTCACCGCCGCTTTCAGGGGTTA
rs2042905	chr19:55980698	TTTCAGAAGGGAGTGGGGTGGGGGTCCGGACTCCAGGGTCTGAGGTAGGAGAGTGGTGAGG	TTTCAGAAGGGAGTGGGGTGGGGGTCCGGAGTCCAGGGTCTGAGGTAGGAGAGTGGTGAGG
rs7246401	chr19:55983093	GGGACATTTGAATAGGGAATGGGTATCAGACAAGACGAAAGCACTACTGCCAAGGAGAAGA	GGGACATTTGAATAGGGAATGGGTATCAGAGAAGACGAAAGCACTACTGCCAAGGAGAAGA
rs11077395	chr17:74290335	CGGACTCGACCTGGCCTGCAGCCAGGCTACTGCACGAAAGCCCAAGGTCGTGTCCGGCCAC	CGGACTCGACCTGGCCTGCAGCCAGGCTACCGCACGAAAGCCCAAGGTCGTGTCCGGCCAC
rs12944556	chr17:74293103	TCACAGAACCTTTAAACTGGGTGTGGGCTCTCTGCAAGTTTCGCTGTGGTTTCTAAGTCCT	TCACAGAACCTTTAAACTGGGTGTGGGCTCCCTGCAAGTTTCGCTGTGGTTTCTAAGTCCT
rs10741561	chr11:2256757	CTGTCCGGATATGAGATCATGCAGAAAGTGACCATATACTCAGGACAGGACAGGTTCATTT	CTGTCCGGATATGAGATCATGCAGAAAGTGGCCATATACTCAGGACAGGACAGGTTCATTT
rs3814394	chr2:151170376	CAAAGGCCATTGGAAACTCAACCCTACTGCGCTAGGGACCCAAACACTTGTCAGCTTAGTT	CAAAGGCCATTGGAAACTCAACCCTACTGCTCTAGGGACCCAAACACTTGTCAGCTTAGTT
rs3814395	chr2:151170492	TTAATTCTTTATCTATAGCCTCCATCTTCCCGGAATCAAAGCACCCTAGACTGGACTCAGA	TTAATTCTTTATCTATAGCCTCCATCTTCCTGGAATCAAAGCACCCTAGACTGGACTCAGA
rs2222760	chr2:151170621	TATTCTGGTCCTTTCTAAGATTTTTGCTTGCGGGGAAGAGTTGGAGGGCTAGGGAGATGGA	TATTCTGGTCCTTTCTAAGATTTTTGCTTGTGGGGAAGAGTTGGAGGGCTAGGGAGATGGA
rs1528431	chr2:151171885	TTGTTTTGCCTGGGATAGACCCTGTTTACCTCTGTTGTCCAGCCACAATCATTGGTAGTGC	TTGTTTTGCCTGGGATAGACCCTGTTTACCCCTGTTGTCCAGCCACAATCATTGGTAGTGC
rs6432778	chr2:151172496	TTGAGGAATAGAAGAAAGGCCAGAATGACTAGGGCCTGCTGAAGGAGGGAGAGTGTAGGTC	TTGAGGAATAGAAGAAAGGCCAGAATGACTGGGGCCTGCTGAAGGAGGGAGAGTGTAGGTC
rs6432779	chr2:151172688	TGAATGAATGAATGAATGACTCCAGTTCTTCGTCTGCACTGTCACTCACTAGCTGTGAAAC	TGAATGAATGAATGAATGACTCCAGTTCTTGGTCTGCACTGTCACTCACTAGCTGTGAAAC
rs10803791	chr2:151176691	CTTAATTCTAACAGAGCAAAAAGCTATCGTGAGGACATTGTATGAAGCCATTGATCTTAAT	CTTAATTCTAACAGAGCAAAAAGCTATCGTCAGGACATTGTATGAAGCCATTGATCTTAAT
rs10930130	chr2:151176821	CGCCCCATAGTGCTTCCACACTGTCACAGCTACACTATGGAATCAATCAAATGACTGCTTT	CGCCCCATAGTGCTTCCACACTGTCACAGCCACACTATGGAATCAATCAAATGACTGCTTT
rs12692718	chr2:151177253	TATCTTGGGAACTTTCCAAGAATGGTGCTTCCCAGAAAAGTCTGAAATACATGAATTCATA	TATCTTGGGAACTTTCCAAGAATGGTGCTTTCCAGAAAAGTCTGAAATACATGAATTCATA
rs1569158	chr2:151177435	TTTATGTGCCTTCTTCACAACACCTGCTTATAGAAAATTAACATGGAAGTCCTGGAAAACC	TTTATGTGCCTTCTTCACAACACCTGCTTACAGAAAATTAACATGGAAGTCCTGGAAAACC
rs1773569	chr1:52170288	ACTGACCCCCCAATTGCTCCTTATGCATTACAGATTGCAGCCCCTGGCTCATGGTCATCCT	ACTGACCCCCCAATTGCTCCTTATGCATTAAAGATTGCAGCCCCTGGCTCATGGTCATCCT
rs1620221	chr1:52170828	CTAATTTCTCTCGCACGCACACCCCTTCCTTATTTGTAGAAAGAGCAATAATAAGAGCTGC	CTAATTTCTCTCGCACGCACACCCCTTCCTCATTTGTAGAAAGAGCAATAATAAGAGCTGC
rs6562737	chr13:72521343	CAATGACAAACTCATTTTGTCGTTTTTTTTAAAAAAAAAACTTTCATTAGAGAGATAGTAT	CAATGACAAACTCATTTTGTCGTTTTTTTTTAAAAAAAAACTTTCATTAGAGAGATAGTAT
rs9573092	chr13:72525276	GTCTATGCATTTTGTCAAATCAGTGTAAGCAGCCTATTTTATTTAATATGAGAAAACAGAG	GTCTATGCATTTTGTCAAATCAGTGTAAGCGGCCTATTTTATTTAATATGAGAAAACAGAG
rs1078378	chr17:55511112	GTGGGGTGATCCCAGGGAAATACTTCCGGGACATCCTCCCGTTCCGCGCGCTCTAGTTCCG	GTGGGGTGATCCCAGGGAAATACTTCCGGGGCATCCTCCCGTTCCGCGCGCTCTAGTTCCG
rs2087840	chr17:55511209	GGTTTCCATGACTACGGGACTCCTCCGACCGGTACCCTGCAGATGCTTGTCAGAAATTGGC	GGTTTCCATGACTACGGGACTCCTCCGACCAGTACCCTGCAGATGCTTGTCAGAAATTGGC
rs8066241	chr17:55511931	AGCTTTCCCTACTTAAGTGACAGCTGGCTGTACTCTTGGTTCCTTTTTCTCCCTTTTTCCC	AGCTTTCCCTACTTAAGTGACAGCTGGCTGCACTCTTGGTTCCTTTTTCTCCCTTTTTCCC
rs9914853	chr17:55514084	AAATGAGGTAGATATTATTTCCCCCTTTTATAGTTGGGAAAATGGTGCCGAAGAGTATAAA	AAATGAGGTAGATATTATTTCCCCCTTTTACAGTTGGGAAAATGGTGCCGAAGAGTATAAA
rs7210612	chr17:55516088	GCAGGTGGATTGGCCAAACAATACATTCTGAACACAAAGGGTTTTTATTTAAAGTGTATGC	GCAGGTGGATTGGCCAAACAATACATTCTGCACACAAAGGGTTTTTATTTAAAGTGTATGC
rs7211063	chr17:55516281	GGGGTTCTCATAAGTCAACATGGCAATGTACATCACAGGGTTAAAATGAACATACTCTTTA	GGGGTTCTCATAAGTCAACATGGCAATGTATATCACAGGGTTAAAATGAACATACTCTTTA
rs16944016	chr17:55516634	CACCGGGCCCGACCAATGAACATACTCTTTAGTCATCAATTTTACATCTTAGAATTTGTCC	CACCGGGCCCGACCAATGAACATACTCTTTTGTCATCAATTTTACATCTTAGAATTTGTCC
rs16944017	chr17:55517086	GGAATTATTTTAAAGGTGTGGAAACCACCAGCCTGTGATGGATGCATCTTTTTCTTGGGAA	GGAATTATTTTAAAGGTGTGGAAACCACCAACCTGTGATGGATGCATCTTTTTCTTGGGAA
rs7217280	chr17:55517520	AACATCTTATATATTCTAGTTAAAAGCAATGCATTCACATAATCTCAAAACAGTAAGGCCG	AACATCTTATATATTCTAGTTAAAAGCAATACATTCACATAATCTCAAAACAGTAAGGCCG
rs16944030	chr17:55520648	TACCTAAGCAAGGCTCTGAGCCAAGGGAACGCCCTCCTCTGACAGAAAAATAAGACTCCTA	TACCTAAGCAAGGCTCTGAGCCAAGGGAACACCCTCCTCTGACAGAAAAATAAGACTCCTA
rs10433674	chr4:72126761	CTATATATGGTCCTTCATGCTAAAGGACCTCGTGGAGATGGGTGGGCTAAAAACACAGACT	CTATATATGGTCCTTCATGCTAAAGGACCTTGTGGAGATGGGTGGGCTAAAAACACAGACT
rs10446507	chr4:72131647	CTTTCTTCTTTTTGGGGAATCTTTTAAAAAATTTTTAATTTAATTTGAAGTTCCAGGATAC	CTTTCTTCTTTTTGGGGAATCTTTTAAAAATTTTTTAATTTAATTTGAAGTTCCAGGATAC
rs3093030	chr19:10258403	CTCCCCCAAGAAAACATTGTGGGTTGATGGCCATACCCTGAGGTTCTGGTCCAAATCGGAC	CTCCCCCAAGAAAACATTGTGGGTTGATGGTCATACCCTGAGGTTCTGGTCCAAATCGGAC
rs17651437	chr2:105514202	CTGATTTGGGGGACCAACAGCTCCTGATTCTTCCTTAATGTCTTACTTACGAGTATGCTGA	CTGATTTGGGGGACCAACAGCTCCTGATTCCTCCTTAATGTCTTACTTACGAGTATGCTGA
rs7562577	chr2:105514726	AATATTTAATGATATAGGAACAATACATATAATTATAGATTGATAATAAAAAGCAGGTCAT	AATATTTAATGATATAGGAACAATACATATTATTATAGATTGATAATAAAAAGCAGGTCAT
rs17030907	chr2:105515275	AAAATTAACTTCATCTAAAATCTTAGTTTCCGAGACTCAGAAGACAGCTTTCTGTGTTTCT	AAAATTAACTTCATCTAAAATCTTAGTTTCTGAGACTCAGAAGACAGCTTTCTGTGTTTCT
rs11124034	chr2:105518063	TGTGGCACTTGCCTGTCTTTTATGGTATCATAGGGGAAAGGTGGACAGATACTTTTTGGTC	TGTGGCACTTGCCTGTCTTTTATGGTATCACAGGGGAAAGGTGGACAGATACTTTTTGGTC
rs13411044	chr2:105518299	AGCTACCAGCCTGGGTGAGGGCACCCCACCGTGGGCAGAGTCTCCTGCAAAATCTCAGCAC	AGCTACCAGCCTGGGTGAGGGCACCCCACCATGGGCAGAGTCTCCTGCAAAATCTCAGCAC
rs17720255	chr2:71074145	GGCTGCTAGAGAATCCAGAGAAGGCTTCATGTAGGAGATGGCACTGAGGCTGACCAGGAAA	GGCTGCTAGAGAATCCAGAGAAGGCTTCATTTAGGAGATGGCACTGAGGCTGACCAGGAAA
rs17663700	chr2:71074428	TCATACAGTTTGGGGTTGGCGGGGAGGAACCGCCTAGCACAGAAGAAGGAAAAAGCCAGCC	TCATACAGTTTGGGGTTGGCGGGGAGGAACTGCCTAGCACAGAAGAAGGAAAAAGCCAGCC
rs799906	chr17:38531642	TCCAGCCCCAGGAGTCTGGGGCAAGTAGTCTTGTAAGGTCAGTGGCCTGCGGGGACGCAGT	TCCAGCCCCAGGAGTCTGGGGCAAGTAGTCCTGTAAGGTCAGTGGCCTGCGGGGACGCAGT
rs6503726	chr17:38538268	AGCCTCCCGAGTAGCTTGGGACTACAGACGTGCGCAACCATGCCCAGCTAATTCTTTTTTT	AGCCTCCCGAGTAGCTTGGGACTACAGACGCGCGCAACCATGCCCAGCTAATTCTTTTTTT
rs2175957	chr17:38540348	CCCTCATACAGTTCAGGGTCATACCCCCAATAGCTGGTTTTATATTTGAAAGCAGACACTG	CCCTCATACAGTTCAGGGTCATACCCCCAAGAGCTGGTTTTATATTTGAAAGCAGACACTG
rs1554064	chr17:38540677	AATGAAGCACAAAGGAGAGCCTGCTAGTTCCTAACCCACGCCTGAAGACGCCTTAGGCGGT	AATGAAGCACAAAGGAGAGCCTGCTAGTTCGTAACCCACGCCTGAAGACGCCTTAGGCGGT
rs9428598	chr1:240944046	AACTGTTTACCTCCTCTGCAAGGGTTTGATAAATGGAAAAAAGGATTTGTGAGACTAGTCT	AACTGTTTACCTCCTCTGCAAGGGTTTGATGAATGGAAAAAAGGATTTGTGAGACTAGTCT
rs2236939	chr3:50218514	TAAGTTAGAGCCCGCGCAGCGCACGGCGGAGAGAAGGAACCAAGACTTGGTTTGCAAGAGC	TAAGTTAGAGCCCGCGCAGCGCACGGCGGATAGAAGGAACCAAGACTTGGTTTGCAAGAGC
rs2236940	chr3:50219084	ATCAGGACTGGAAGAGGCCAAGCCTGGCACGTCTCTGAGAGGGCTGGAATGACTGAAACCA	ATCAGGACTGGAAGAGGCCAAGCCTGGCACATCTCTGAGAGGGCTGGAATGACTGAAACCA
rs2236941	chr3:50222828	ATCTTGGCGGAGGTCAGGTAGCCTGGGCCTCAGCAATAAGCTCCAGAGGGTCTGTGCCTCC	ATCTTGGCGGAGGTCAGGTAGCCTGGGCCTTAGCAATAAGCTCCAGAGGGTCTGTGCCTCC
rs2236942	chr3:50223811	TCCAGACTCCTAGACCTGGCCTTTACAGCTGTATCAGGTTTGTCTGTTGCCACAGAACCTT	TCCAGACTCCTAGACCTGGCCTTTACAGCTCTATCAGGTTTGTCTGTTGCCACAGAACCTT
rs2282749	chr3:50225841	GGAGGGTGAGGTGTGTGTGGCACAGAGAACTGGCCCTGGAGCACCCGTTTCCTGGAAGGCC	GGAGGGTGAGGTGTGTGTGGCACAGAGAACCGGCCCTGGAGCACCCGTTTCCTGGAAGGCC
rs17095708	chr10:118891724	TTGAGTTAGATAACTTCACCTTTTAAACTTCGGTGACTCTGCTAAGCTTCCTGCGGGCAGG	TTGAGTTAGATAACTTCACCTTTTAAACTTTGGTGACTCTGCTAAGCTTCCTGCGGGCAGG
rs12763760	chr10:118892289	GGGCCTCATCTCTGCATCATCATAGACAAACCCAGTAATTAAGAGAACTCACTGGCTTTAG	GGGCCTCATCTCTGCATCATCATAGACAAAGCCAGTAATTAAGAGAACTCACTGGCTTTAG
rs17095719	chr10:118893811	AACATCATACAATTTTAGAGTTAAAAGGAACCCCATTAATTCTATAGGCTCACTTATTCAA	AACATCATACAATTTTAGAGTTAAAAGGAAGCCCATTAATTCTATAGGCTCACTTATTCAA
rs716183	chr10:118894485	AAAATGAAGTGGAAGTTGTGCTTGTTCTGTCTGGGGCTAGGCTTTAAAGAGGTCTGGTAGT	AAAATGAAGTGGAAGTTGTGCTTGTTCTGTTTGGGGCTAGGCTTTAAAGAGGTCTGGTAGT
rs716181	chr10:118894541	GTAGTTTTTGTTCTTGCTCTCTCATAGAACCGAGCTGCTATGCTGTAAGGAAGGCAGTCTA	GTAGTTTTTGTTCTTGCTCTCTCATAGAACTGAGCTGCTATGCTGTAAGGAAGGCAGTCTA
rs11593856	chr10:118896133	TGAAGTATTTTTATTTCAGTGTGTAGGAATGCTTGCTCAGAAGTCACTTATTTTATAAACC	TGAAGTATTTTTATTTCAGTGTGTAGGAATTCTTGCTCAGAAGTCACTTATTTTATAAACC
rs11650724	chr17:37114871	TCTGGCTCGTGGACAGAAATGACCTCTGCCGTCTGCCAGGGATCATTTGGAATCAGGTGGG	TCTGGCTCGTGGACAGAAATGACCTCTGCCCTCTGCCAGGGATCATTTGGAATCAGGTGGG
rs7215317	chr17:37115147	CCTCGATCACCATTGTGTCCCCAGGGTCAGAACAGTGCCTGACACAAAGCAGGCACTTGGA	CCTCGATCACCATTGTGTCCCCAGGGTCAGTACAGTGCCTGACACAAAGCAGGCACTTGGA
rs11657214	chr17:37115809	ACATGGAGTCCAAGACCCGGGGGTTCCCCAACTCAGCTCCCTCACCTCCTACCTGTTGGGC	ACATGGAGTCCAAGACCCGGGGGTTCCCCAGCTCAGCTCCCTCACCTCCTACCTGTTGGGC
rs6503653	chr17:37117427	TGGAATGAATTTGGAATATTCGGATGGTCAGAATAACTCAAAGAACAGCTCCCTTCTTTGT	TGGAATGAATTTGGAATATTCGGATGGTCAAAATAACTCAAAGAACAGCTCCCTTCTTTGT
rs7217461	chr17:37119282	ATTGAGACCCAGAGAGGATGGGGGAGAAGACGCAAAATGGATTAAATACCTGCGATATTCT	ATTGAGACCCAGAGAGGATGGGGGAGAAGATGCAAAATGGATTAAATACCTGCGATATTCT
rs7219043	chr17:37121052	ACGTCTGTAATCCCAGAACTTTGGCAGACTAAGCTGGGCCGATCATGAGGTCAGGAGTTCG	ACGTCTGTAATCCCAGAACTTTGGCAGACTGAGCTGGGCCGATCATGAGGTCAGGAGTTCG
rs7219746	chr17:37121495	GCACAGAGGGCCTAAGGAGAAGAAGGCACCAAGGGTGTTCCATGGTAGGGGGAGGGTGAAA	GCACAGAGGGCCTAAGGAGAAGAAGGCACCGAGGGTGTTCCATGGTAGGGGGAGGGTGAAA
rs11712564	chr3:15122993	ATTTCTCAGAAAAAGGTTTTCTTTCTCAAACAGATGAATGAATAAACAAAGCATGGTCTAT	ATTTCTCAGAAAAAGGTTTTCTTTCTCAAATAGATGAATGAATAAACAAAGCATGGTCTAT
rs233948	chr16:4267175	GGAGTTGGAGACCAGCCTGGACAACATAACCAGATGCTGTCTTTACAAAAAAATAAAAAAA	GGAGTTGGAGACCAGCCTGGACAACATAACTAGATGCTGTCTTTACAAAAAAATAAAAAAA
rs913861	chr1:150435293	TGTGCTGCCTGAGAGAATATAGCATGTTCCGGCAGAGCTTCCACCTGGGCCTACCCCAGAA	TGTGCTGCCTGAGAGAATATAGCATGTTCCAGCAGAGCTTCCACCTGGGCCTACCCCAGAA
rs4845563	chr1:150442099	GGAAGGAATCATTGTCTTCATAATTCTCAGGGAAAAAGAAAACCATGGAAGGGTGTCTTGA	GGAAGGAATCATTGTCTTCATAATTCTCAGAGAAAAAGAAAACCATGGAAGGGTGTCTTGA
rs11620337	chr13:32762775	GTAAGTGGTAATAGATTTCCTTTACTTTGTCTCTCAGCCCTCCCTACTGTCTGGTGCATTC	GTAAGTGGTAATAGATTTCCTTTACTTTGTTTCTCAGCCCTCCCTACTGTCTGGTGCATTC
rs4943088	chr13:32766168	TTTCACTTTGTTGGCTAGTGACAAAAGTATATGCTTTGACCATCAAACAGGACAGTTTAAG	TTTCACTTTGTTGGCTAGTGACAAAAGTATTTGCTTTGACCATCAAACAGGACAGTTTAAG
rs11706367	chr3:15081919	AGGCGGCCTTCGACCCGGCGCGGCGAGAACCGGTGTGTGCAGCTTCGCTTTAGGACGCCTT	AGGCGGCCTTCGACCCGGCGCGGCGAGAACTGGTGTGTGCAGCTTCGCTTTAGGACGCCTT
rs3746499	chr20:43943169	GCGAATCGTCACGCTACGATTGGTCCGTGGTGCTAAAGCCTGAAAGCGAATTCCTCAGACA	GCGAATCGTCACGCTACGATTGGTCCGTGGCGCTAAAGCCTGAAAGCGAATTCCTCAGACA
rs2445837	chr19:55613084	CAGTGTCCCCCAGAGACCACAAAGCACCATATAGCAAAAGTCCAGAACTTTATTAATTCTC	CAGTGTCCCCCAGAGACCACAAAGCACCATGTAGCAAAAGTCCAGAACTTTATTAATTCTC
rs557816	chr1:240832647	AAAAACAAACAAACAAAAACAACAACAACAGAAAACAGGGGTACTGAGAAAGAGCCAGATG	AAAAACAAACAAACAAAAACAACAACAACAAAAAACAGGGGTACTGAGAAAGAGCCAGATG
rs10927200	chr1:240835974	AAGAAATGAGGGCTGCTCGGTGGAGAGGGGACCTACAGGCTCAGCTCACAGTCTTTCAAAC	AAGAAATGAGGGCTGCTCGGTGGAGAGGGGTCCTACAGGCTCAGCTCACAGTCTTTCAAAC
rs900895	chr1:240836478	TGGGCACTGCCATTGATATGACGCGGCTTCCATGACACCCTGTCTGTTGGGGTCAGGTCAC	TGGGCACTGCCATTGATATGACGCGGCTTCTATGACACCCTGTCTGTTGGGGTCAGGTCAC
rs4658627	chr1:240837217	ATGTGAAAATATTAAAAATTGGTGAAACTAGGTTGAAGGTACATGAACGCTTGTTGTATTC	ATGTGAAAATATTAAAAATTGGTGAAACTAAGTTGAAGGTACATGAACGCTTGTTGTATTC
rs900893	chr1:240838288	TACACTGGAGCAGGTACACCATGTGCTTTGGGGGTAGGGGAGGGAATGAAGAAGATGGTGG	TACACTGGAGCAGGTACACCATGTGCTTTGAGGGTAGGGGAGGGAATGAAGAAGATGGTGG
rs900891	chr1:240838391	AAACCCTGTCTAAGAGACCAACTCAAGGCCAAAGGACCTCCCCCTTCAAAAGAACTGCAAC	AAACCCTGTCTAAGAGACCAACTCAAGGCCGAAGGACCTCCCCCTTCAAAAGAACTGCAAC
rs900890	chr1:240838412	TCTCAGAGTGTGGAGCCCAGGAAACCCTGTCTAAGAGACCAACTCAAGGCCAAAGGACCTC	TCTCAGAGTGTGGAGCCCAGGAAACCCTGTGTAAGAGACCAACTCAAGGCCAAAGGACCTC
rs4795397	chr17:35277271	ACTAGTCATCCATCCCTACAGAAAAGGCCAATCGGGCTCCATCCCTACAGAAAAGGCCAAT	ACTAGTCATCCATCCCTACAGAAAAGGCCAGTCGGGCTCCATCCCTACAGAAAAGGCCAAT
rs7077568	chr10:17538873	GAAAATGAAGAGTTGCCTGGATTTGAAAGATATTCCAATTTTTATCTCAGTGCAGAAAATT	GAAAATGAAGAGTTGCCTGGATTTGAAAGACATTCCAATTTTTATCTCAGTGCAGAAAATT
rs6602197	chr10:17545473	ACTTCAATGGCCTTTAGAAATGCTGGGTACGATCACAGTAATGATAGAAAAGTAAATATAA	ACTTCAATGGCCTTTAGAAATGCTGGGTACAATCACAGTAATGATAGAAAAGTAAATATAA
rs1810765	chr1:150328193	AAGCCCTCCAGCCTCTGCACCTGACCTCCATGCACCTCTTCCTAAAAGATCCCTGAGTCAC	AAGCCCTCCAGCCTCTGCACCTGACCTCCACGCACCTCTTCCTAAAAGATCCCTGAGTCAC
rs743687	chr1:150328598	TAATCCTTTCCTGTGCGTGGTAGGATCAGGGAGGGCAATGTGGAGGGAGACCCGCTGTTTG	TAATCCTTTCCTGTGCGTGGTAGGATCAGGCAGGGCAATGTGGAGGGAGACCCGCTGTTTG
rs255050	chr16:66562320	ATTTAGAGAGAGGGTCTTGCTCTGTCACTTTGGGCTGGAGTGCAGTGGTGCAATCACAGCT	ATTTAGAGAGAGGGTCTTGCTCTGTCACTTCGGGCTGGAGTGCAGTGGTGCAATCACAGCT
rs3762262	chr1:150321948	TGTGGGCAAGGAGGGCGCCTCACAGGATGCCGGTGTCCCACAGAGGATACTCAGGGTCACC	TGTGGGCAAGGAGGGCGCCTCACAGGATGCTGGTGTCCCACAGAGGATACTCAGGGTCACC
rs2800946	chr1:148138128	TCCTCTCTCATTTCATTCAGAATTTGCTCTTGGACACTATTATACATTGCCTACTAAGATT	TCCTCTCTCATTTCATTCAGAATTTGCTCTCGGACACTATTATACATTGCCTACTAAGATT
rs744536	chr1:148141867	TGTTCTGATAAGTATCCTGCCGTATTCACTTCCATGTCATTGCAAACACAGGGCCACTTAA	TGTTCTGATAAGTATCCTGCCGTATTCACTACCATGTCATTGCAAACACAGGGCCACTTAA
rs4606774	chr17:1342947	GCCCCTCCTCCTGCCCACTCTCTGGTACCACCTAGAGAGCACGGGGCCCACTCCCCAAACC	GCCCCTCCTCCTGCCCACTCTCTGGTACCAGCTAGAGAGCACGGGGCCCACTCCCCAAACC
rs1721238	chr2:74058524	TTTCACACATTACTTTTAATCCATGCAATAGTGCTGTAAGGTAGGTGCTATCATTATACCC	TTTCACACATTACTTTTAATCCATGCAATAATGCTGTAAGGTAGGTGCTATCATTATACCC
rs831522	chr2:74059376	TCCTCCCCTCTTTATCAATTTCCTCCCTACCCACTAGGTTAATTTTGTTTAATTTTACAAG	TCCTCCCCTCTTTATCAATTTCCTCCCTACACACTAGGTTAATTTTGTTTAATTTTACAAG
rs831524	chr2:74063834	AGATTTATTGTACATCAAAGAACACTCCTTGCGGTAGGAAGGGCCCAAGCAAGCAGCAATT	AGATTTATTGTACATCAAAGAACACTCCTTCCGGTAGGAAGGGCCCAAGCAAGCAGCAATT
rs831525	chr2:74064986	TACTCGCCATTGCTTACGTCCAAGAACCCAGCCTACCAGGTTTAAACAATTTCCAGTCACA	TACTCGCCATTGCTTACGTCCAAGAACCCAACCTACCAGGTTTAAACAATTTCCAGTCACA
rs7253352	chr19:19114197	AGATGGCATCCTATACTCCGCCGTATAAACAAGTGCCCCCTCCGGGTTCTGTCACTTATAT	AGATGGCATCCTATACTCCGCCGTATAAACGAGTGCCCCCTCCGGGTTCTGTCACTTATAT
rs3976737	chr1:148182548	ACTGCACTCCAGCCTGAGTGACAGAACTAACGAAACGCTGTCTCAAAAAAAGGAAAGAAAA	ACTGCACTCCAGCCTGAGTGACAGAACTAATGAAACGCTGTCTCAAAAAAAGGAAAGAAAA
rs7504032	chr17:1310077	CCAGGCACAGTGCTGACTGCCTTTGTATGGATCATCTCATTTAATCCTCTCAACAACCTTA	CCAGGCACAGTGCTGACTGCCTTTGTATGGGTCATCTCATTTAATCCTCTCAACAACCTTA
rs11653564	chr17:1310268	ACTCTGCTCTACCCTCAATTTTCTGAGATAGGAATTGGGAGGAAGGGTTGGCAGAAATCTA	ACTCTGCTCTACCCTCAATTTTCTGAGATACGAATTGGGAGGAAGGGTTGGCAGAAATCTA
rs8071748	chr17:1312711	ATACCTATCTTATCTATCAGCTTCTTGGAGGCATCGTTACTGCTGATAAAGTGGACGAATA	ATACCTATCTTATCTATCAGCTTCTTGGAGCCATCGTTACTGCTGATAAAGTGGACGAATA
rs6504192	chr17:59408762	ACCCTCCCAACTGCAATCAGACGTTTGCATCTTCCACTGTTCCACCCTTCAACCCAGGAAA	ACCCTCCCAACTGCAATCAGACGTTTGCATTTTCCACTGTTCCACCCTTCAACCCAGGAAA
rs2041277	chr17:59410101	TCCTGGGGGAGGTGGACGTGGCACACGGTGTCCGAGACACAAGGAGAAGGTGAGGCCTGCC	TCCTGGGGGAGGTGGACGTGGCACACGGTGGCCGAGACACAAGGAGAAGGTGAGGCCTGCC
rs3859190	chr17:35390088	TCTAACCAAGGAAGTCCGGATCCCATAGGGTTCTTCCTACTCTCCAGTTCGGTTTATTTTA	TCTAACCAAGGAAGTCCGGATCCCATAGGGGTCTTCCTACTCTCCAGTTCGGTTTATTTTA
rs11225395	chr11:102101690	TTTAGAGAGACTGAGCTGGGAGCTACTATAAGCTCTGCATGGTAGTCTCCCACTTGAGTCT	TTTAGAGAGACTGAGCTGGGAGCTACTATAGGCTCTGCATGGTAGTCTCCCACTTGAGTCT
rs1939013	chr11:102103020	ACACTTCAGTGCGAACAGGAGTTGTTCGCCTGTTGAGTAGATATCTTGCTAGAAAAAACAA	ACACTTCAGTGCGAACAGGAGTTGTTCGCCCGTTGAGTAGATATCTTGCTAGAAAAAACAA
rs3758857	chr11:102103569	CAAGGCAAAATGTCCTCAGCTTCATGCCTTTCTGAACTCTCATGATCAGAATGGATGTCCA	CAAGGCAAAATGTCCTCAGCTTCATGCCTTCCTGAACTCTCATGATCAGAATGGATGTCCA
rs7946781	chr11:102104009	AAGTTAAGCCACCAAGTGAAGTAACTTCCATGGAGCTTCCTTTAGTAGCCAGTGTTCAAGT	AAGTTAAGCCACCAAGTGAAGTAACTTCCACGGAGCTTCCTTTAGTAGCCAGTGTTCAAGT
rs6590986	chr11:102104069	TTCAGCCAGGGAACATATGTGTGTGACTCACATCCTTTGCACAGAGTATAAATGTATACAC	TTCAGCCAGGGAACATATGTGTGTGACTCATATCCTTTGCACAGAGTATAAATGTATACAC
rs7105686	chr11:102104151	GGATTAATCACTGTGCTAAGTCTTAGATATGCAGCATCTATTACCTTCCTTAAGCTTCATA	GGATTAATCACTGTGCTAAGTCTTAGATATTCAGCATCTATTACCTTCCTTAAGCTTCATA
rs10895354	chr11:102104264	TCAGAGATATGATTCAAATTTACCTTTTCATTGACTCTTCCTAAAATCTCCTTTGTTCTCT	TCAGAGATATGATTCAAATTTACCTTTTCACTGACTCTTCCTAAAATCTCCTTTGTTCTCT
rs10750653	chr11:102105216	CAGACATTGTTTGTTTCTGAGCCATGTAACAATCTATGCTGACTTAATAAAACTAACCGGG	CAGACATTGTTTGTTTCTGAGCCATGTAACGATCTATGCTGACTTAATAAAACTAACCGGG
rs17099462	chr11:102105916	CTGAAGGAAGTGGAGACTTAGAGAAGCCGTGGTAGTGAATTCAACCCACAGATGAGGCTGA	CTGAAGGAAGTGGAGACTTAGAGAAGCCGTTGTAGTGAATTCAACCCACAGATGAGGCTGA
rs3021490	chr17:59438344	TCTCAAAAAAAAAAAGAAAAAGAAAAAGAAAAGAAAACTGAGTGGGATGTGAAGGTTTAT	TCTCAAAAAAAAAAAGAAAAAGAAAAAGAAGAGAAAACTGAGTGGGATGTGAAGGTTTAT
rs3021488	chr17:59439745	TCTTCTTGCGCCTGCTCGGGCGGGCTTCAACAGTCACCATGGCAGGCTATCATTCATGGT	TCTTCTTGCGCCTGCTCGGGCGGGCTTCAATAGTCACCATGGCAGGCTATCATTCATGGT
rs10805837	chr5:85947410	TGGGTAGGAGTCAACTAGACAACTCTGCTCCACACAGCAGTGACTGTGGTCACTCAGCAAT	TGGGTAGGAGTCAACTAGACAACTCTGCTCTACACAGCAGTGACTGTGGTCACTCAGCAAT
rs84188	chr21:45046275	GTGGGAGCTCAACCCGCGACCGCGGCTACGATTCTCTTGGCTCCTGCCCTCGCCTTAGTCG	GTGGGAGCTCAACCCGCGACCGCGGCTACGGTTCTCTTGGCTCCTGCCCTCGCCTTAGTCG
rs2838692	chr21:45049824	GTGCCAGGGGAGGGGAAATGAGCTGCCAGGCGAATACTAACCTTCCAGCGGCTAGCTTTTC	GTGCCAGGGGAGGGGAAATGAGCTGCCAGGTGAATACTAACCTTCCAGCGGCTAGCTTTTC
rs754298	chr3:50523899	AGCATGAAGTAGTACCTAGTTAAGCAAATATAAGGAGCATCTGCTCAGGAGGGAGGATGCA	AGCATGAAGTAGTACCTAGTTAAGCAAATACAAGGAGCATCTGCTCAGGAGGGAGGATGCA
rs28365049	chr17:53713760	GTAATCCCAGCACTTTGGGAGGCTGAGGCGGGTGGATCACTTGAGGTCAGGAGTTCAAGAC	GTAATCCCAGCACTTTGGGAGGCTGAGGCGAGTGGATCACTTGAGGTCAGGAGTTCAAGAC
rs2333227	chr17:53713761	TCTTGAACTCCTGACCTCAAGTGATCCACCCGCCTCAGCCTCCCAAAGTGCTGGGATTACA	TCTTGAACTCCTGACCTCAAGTGATCCACCTGCCTCAGCCTCCCAAAGTGCTGGGATTACA
rs2243828	chr17:53713883	TTTCTCAGCTCACCATTGTGTGCCTATACCAGTGCTTGTCCCCAGGGGATACACACAACTA	TTTCTCAGCTCACCATTGTGTGCCTATACCGGTGCTTGTCCCCAGGGGATACACACAACTA
rs2107545	chr17:53715117	CATTTCCAAAAGCCTCTAAAATTCTAGAGCTTGATTCACAAAGAGCCACTCGACCAACTTC	CATTTCCAAAAGCCTCTAAAATTCTAGAGCCTGATTCACAAAGAGCCACTCGACCAACTTC
rs4401102	chr17:53715836	GTCAACCTTGAGTATGCTTGAGTGTCCTTTCGCTCTTTTAAGGGAATTGTCAAGGCTCAAC	GTCAACCTTGAGTATGCTTGAGTGTCCTTTTGCTCTTTTAAGGGAATTGTCAAGGCTCAAC
rs1760890	chr14:19951629	AACAAACTAAACTCGGGCCCCAGAAAAGGCGGCAGGGGTCCTGGGCATTCGCGTCGCAGCC	AACAAACTAAACTCGGGCCCCAGAAAAGGCTGCAGGGGTCCTGGGCATTCGCGTCGCAGCC
rs2277627	chr17:45963950	GCAGGAGGGCTCTGGCAGCTGGCAGGAGGGGATCTGAGGGCAGGTGGAACATGGGAGGACC	GCAGGAGGGCTCTGGCAGCTGGCAGGAGGGAATCTGAGGGCAGGTGGAACATGGGAGGACC
rs2277626	chr17:45964040	CTGTCACCTGACTCCTTGTCTTGCTACCAATCTGCTCCTCTGCTTGGCATCCCACACATCA	CTGTCACCTGACTCCTTGTCTTGCTACCAACCTGCTCCTCTGCTTGGCATCCCACACATCA
rs2277625	chr17:45964192	GCCAGGTCCCATGGGTCTAGTTCTACTCCTCATCTCACACTTTGTCATACTTGGTGATGAC	GCCAGGTCCCATGGGTCTAGTTCTACTCCTTATCTCACACTTTGTCATACTTGGTGATGAC
rs4794157	chr17:45964557	AACCATTTGGGGCTGGGCTCCCTGTGTGAAGAGCACTCCAGGCTCCCAGAGTTTGAAGAAC	AACCATTTGGGGCTGGGCTCCCTGTGTGAACAGCACTCCAGGCTCCCAGAGTTTGAAGAAC
rs9900747	chr17:45964788	GGCTCCACCAAAGAGCCAGCCCCAGGGAATGTCCCTGCCCTCTCCTTTAATGTCCTCCCGG	GGCTCCACCAAAGAGCCAGCCCCAGGGAATATCCCTGCCCTCTCCTTTAATGTCCTCCCGG
rs936451	chr17:45965097	CTGCCGGGCCAGCTGAGCAACTTTCCTCGGAGTGCTGCCTGGCGCTGGCTAGGAGGCAAAC	CTGCCGGGCCAGCTGAGCAACTTTCCTCGGGGTGCTGCCTGGCGCTGGCTAGGAGGCAAAC
rs4140659	chr22:32645748	ACATTGCTGAACAAAACAAATGTCTCCATCCGGGCTAAGCAAAGAAGAAATCACCTGTTAG	ACATTGCTGAACAAAACAAATGTCTCCATCAGGGCTAAGCAAAGAAGAAATCACCTGTTAG
rs739830	chr17:19255204	TCGGGGATACCATCCCCCGACCTCACCTTCTACCTACCGCAGCCTGCTAGCCTTTCCGGGA	TCGGGGATACCATCCCCCGACCTCACCTTCCACCTACCGCAGCCTGCTAGCCTTTCCGGGA
rs217367	chr7:44389228	CTCATGTTAGAATTAATGCAGAGAAAAATTTTATCCTTTGAACTAGTTACATGTTGTGGAC	CTCATGTTAGAATTAATGCAGAGAAAAATTATATCCTTTGAACTAGTTACATGTTGTGGAC
rs217356	chr7:44398903	AAAAATCTCATAATGTTTTTAGAAAGTTTATGAATTTGTGTTGGGCTGCATGGGCCACAGG	AAAAATCTCATAATGTTTTTAGAAAGTTTACGAATTTGTGTTGGGCTGCATGGGCCACAGG
rs3985921	chr15:43704721	AAAATATGGCACATATACACCATGGAATACAATGCGATCATAAAAAAGGATGAGTTCATGT	AAAATATGGCACATATACACCATGGAATACTATGCGATCATAAAAAAGGATGAGTTCATGT
rs1967502	chr15:43709224	ACAAAAAAAAAAAAAAAATTGCCAGGTATGGTGTCACATGCCTGTAATCCCAGCTACTCAG	ACAAAAAAAAAAAAAAAATTGCCAGGTATGATGTCACATGCCTGTAATCCCAGCTACTCAG
rs17627219	chr15:43659561	TAAAACTTTCCCTAGTTACTTTCCACTTGTACACTATACAACTGCACATCTGTGATAGGAT	TAAAACTTTCCCTAGTTACTTTCCACTTGTGCACTATACAACTGCACATCTGTGATAGGAT
rs8041902	chr15:43665307	AAAGGATAGAATATTTCAGGTTGAAGCATAGGCAAGAGCACTGCAGACATGAAAGGGCATA	AAAGGATAGAATATTTCAGGTTGAAGCATAAGCAAGAGCACTGCAGACATGAAAGGGCATA
rs1399132	chr2:218985275	ATCACCAGCGACTCACATCTGCCCGACTGGGGGAGTGGGACATGGGGCACACGAGGCAAGC	ATCACCAGCGACTCACATCTGCCCGACTGGAGGAGTGGGACATGGGGCACACGAGGCAAGC
rs4996257	chr2:218988341	TAGGTGAAAGGCAGTGAGAAAGGCACATGGCGGATGTTGATGGTGACTGAAACTGCTGTAA	TAGGTGAAAGGCAGTGAGAAAGGCACATGGTGGATGTTGATGGTGACTGAAACTGCTGTAA
rs312459	chr17:6864966	GAAGCTTTCTGTGATTGGGGGTCCTGGGAGGGGGGAGCAAACTTTTATATTTGAGTCTTGT	GAAGCTTTCTGTGATTGGGGGTCCTGGGAGCGGGGAGCAAACTTTTATATTTGAGTCTTGT
rs312460	chr17:6866854	GACTCCCGTATTGCCAACCTCGATATCCCTAACCTCCTCCCCAATTCCAATATCCCCGTCC	GACTCCCGTATTGCCAACCTCGATATCCCTCACCTCCTCCCCAATTCCAATATCCCCGTCC
rs2955626	chr17:564850	AGTTCCCCGGTCCCGGAAGTGCCCTGGCCTGCCGGAAGTGCCGGAGCGGCTGACAGAGCGG	AGTTCCCCGGTCCCGGAAGTGCCCTGGCCTCCCGGAAGTGCCGGAGCGGCTGACAGAGCGG
rs461251	chr17:565912	TTCTTTTCAGTGTCTGCAGGAAAGGTGGTTTCACAGGGTGATCGGTGATCTGGCTTATTTG	TTCTTTTCAGTGTCTGCAGGAAAGGTGGTTCCACAGGGTGATCGGTGATCTGGCTTATTTG
rs1237094	chr17:566592	AAAGGATGTACATTCATCACGTGCAGAAAAGTAATATTTCCTTGCTGTGAGCTTTATTGGC	AAAGGATGTACATTCATCACGTGCAGAAAAATAATATTTCCTTGCTGTGAGCTTTATTGGC
rs458746	chr17:568663	CCCGTCTCTACTAAAAATACAAAAATTAGCCGGGTGTGGTGGCGTATGCCTGTAATCCCAG	CCCGTCTCTACTAAAAATACAAAAATTAGCTGGGTGTGGTGGCGTATGCCTGTAATCCCAG
rs461521	chr17:569247	TTTGGGTCACGGGAGAGTGCCATTGAGAACGGACAATGGATGCTGAGAAGGACAATGAGAA	TTTGGGTCACGGGAGAGTGCCATTGAGAACTGACAATGGATGCTGAGAAGGACAATGAGAA
rs16954846	chr17:571426	GACCTTCTCCAAAATAGCTGAGCCTTCTGTAAAACTGCTTGTGAAAAAAGAATTGCAGGAC	GACCTTCTCCAAAATAGCTGAGCCTTCTGTGAAACTGCTTGTGAAAAAAGAATTGCAGGAC
rs16954854	chr17:571615	AGATCCTATCGTCACTCTGGGTGGCACAAGGTCCCAGGCCAACTTGTAGTGGAGGAATAGG	AGATCCTATCGTCACTCTGGGTGGCACAAGATCCCAGGCCAACTTGTAGTGGAGGAATAGG
rs12453927	chr17:573112	ATCAGTAGAAAGTTTATATTTCCTGGGGCCAGGCGCAGTGGCTCATGCCTGTCATCCCAGC	ATCAGTAGAAAGTTTATATTTCCTGGGGCCGGGCGCAGTGGCTCATGCCTGTCATCCCAGC
rs437480	chr17:574762	CACACTCTCAGCTCACTGCAACCTCCACCTCTGGGTTCAAGCGATTCTCCTGCCTCAGCCT	CACACTCTCAGCTCACTGCAACCTCCACCTTTGGGTTCAAGCGATTCTCCTGCCTCAGCCT
rs7434271	chr3:19960782	GAGAAGGAAAAGGTTATGGGATCCTGTGAATGGTAGAGAGACACCTGCCACTGGGAATTTG	GAGAAGGAAAAGGTTATGGGATCCTGTGAACGGTAGAGAGACACCTGCCACTGGGAATTTG
rs4610240	chr3:19960959	CCACATTTGACACTAAAATATATACAATTATCAGTCCTCCTCAGTTATCTGGGGCTATGAA	CCACATTTGACACTAAAATATATACAATTACCAGTCCTCCTCAGTTATCTGGGGCTATGAA
rs13097697	chr3:19961493	AAAATAAGGCAGATTTTAAGACAGCCATTATACAGAGTAAGGCAAAGTATTGTGAAATTAC	AAAATAAGGCAGATTTTAAGACAGCCATTACACAGAGTAAGGCAAAGTATTGTGAAATTAC
rs1133328	chr3:19962543	TGCTGCTTTAGTTGAATCCCACACCACATTCAGTCTCTGGCGAGGCTTCAGCCACCACCCC	TGCTGCTTTAGTTGAATCCCACACCACATTAAGTCTCTGGCGAGGCTTCAGCCACCACCCC
rs6502999	chr17:6833363	TTAAGGAAAGTAGCCATCTCCATAACATAAGAGTGCAAGGTGAAGCAGCAAGTGCTGATGG	TTAAGGAAAGTAGCCATCTCCATAACATAAAAGTGCAAGGTGAAGCAGCAAGTGCTGATGG
rs312466	chr17:6839945	TATCATCCTGCAGCTACGCTCCGACCAGGAGGCACAGCCAGTCCCCACAGCCGGCTCTACC	TATCATCCTGCAGCTACGCTCCGACCAGGAAGCACAGCCAGTCCCCACAGCCGGCTCTACC
rs11868083	chr17:63136552	AAGGAGGGCTTTAGGTGCATCCGTTGTCTTCCATCCACATGCACCCTCCTGCTGGCTCCTG	AAGGAGGGCTTTAGGTGCATCCGTTGTCTTTCATCCACATGCACCCTCCTGCTGGCTCCTG
rs4496198	chr17:63137161	AAGCAGAAATTGGCCCTGAGAGCCAATTCACAGGGAGGGCGCAGAGGGAATGCAGGCTGAA	AAGCAGAAATTGGCCCTGAGAGCCAATTCATAGGGAGGGCGCAGAGGGAATGCAGGCTGAA
rs12453460	chr17:63141331	TACGAATATTCCTTTGATGAAGCACTTACTGTACCCCATTCATGCAATGTACACGTCACCA	TACGAATATTCCTTTGATGAAGCACTTACTTTACCCCATTCATGCAATGTACACGTCACCA
rs4791216	chr17:63141591	AAAGGCAGCTGTGACCCTGTGCATTTTACTGTGTGTTGTGGATGTTCTCTCTGGATTGTTT	AAAGGCAGCTGTGACCCTGTGCATTTTACTTTGTGTTGTGGATGTTCTCTCTGGATTGTTT
rs3760222	chr17:63144214	CTCCCTAGACCCATCTACAGTCTCTCAAGTCCCCACCTAGAACAGCACGCAGCCGATTCAG	CTCCCTAGACCCATCTACAGTCTCTCAAGTGCCCACCTAGAACAGCACGCAGCCGATTCAG
rs960121	chr17:63144258	CCAGGAAGGGATAGGGTAGGCGCGGAAGTGCTGCTTACTGGGTCCTGAATCGGCTGCGTGC	CCAGGAAGGGATAGGGTAGGCGCGGAAGTGTTGCTTACTGGGTCCTGAATCGGCTGCGTGC
rs244904	chr5:167839000	CCCGCAAGGTGGTGCCTAAGTGTATATGTCATCCTGGCAAAACAGATTATGGGAGTGGGGG	CCCGCAAGGTGGTGCCTAAGTGTATATGTCGTCCTGGCAAAACAGATTATGGGAGTGGGGG
rs173435	chr5:167839795	TGTGCTATTAGGCAATTTTGTTGTGTGAGCATCAGAGAGTGTACTTGCACAAACCTGGATG	TGTGCTATTAGGCAATTTTGTTGTGTGAGCGTCAGAGAGTGTACTTGCACAAACCTGGATG
rs7721761	chr5:167841219	ATTGCTTAGAGGCATTTTGTTTTCTCTTTCGTTTTCTGTAATTTCAGACTAGCTGATAAAT	ATTGCTTAGAGGCATTTTGTTTTCTCTTTCCTTTTCTGTAATTTCAGACTAGCTGATAAAT
rs823816	chr5:167842327	TACCTGCCTTTTCTTTTTGCTTTCCTTCATCCTTACCAGCCCAACTCCCCCTCCCTAAATT	TACCTGCCTTTTCTTTTTGCTTTCCTTCATTCTTACCAGCCCAACTCCCCCTCCCTAAATT
rs244899	chr5:167843618	ATATTAAGTGGAAAATTACCAATTCATAGGCTTAAATAACCAATTCAGAAATAACCAATTC	ATATTAAGTGGAAAATTACCAATTCATAGGTTTAAATAACCAATTCAGAAATAACCAATTC
rs17524558	chr5:167846037	AGGGGGTTTCCGCTTCCGGGAGAGGCTGACCGTTTCCGCTTCCGTCCACTTGGCGAGTGAG	AGGGGGTTTCCGCTTCCGGGAGAGGCTGACAGTTTCCGCTTCCGTCCACTTGGCGAGTGAG
rs17697965	chr19:10380410	TGGTATTGCCCTGACACATAGATTCCTGCGGGTACAATTCGGTTTCAACTATGCAACACTT	TGGTATTGCCCTGACACATAGATTCCTGCGTGTACAATTCGGTTTCAACTATGCAACACTT
rs6073134	chr20:41647939	CACATTTTGACTCAGGGAAGGGATCGGGAGCGCTCTTTTGTGTGGTAACTGTGATAACAGT	CACATTTTGACTCAGGGAAGGGATCGGGAGAGCTCTTTTGTGTGGTAACTGTGATAACAGT
rs1055334	chr20:41650061	ATACACACTGATTTCCATCTTAATAGTGCCAGATAATTGACAAATTTGGGACAAGATGAGG	ATACACACTGATTTCCATCTTAATAGTGCCGGATAATTGACAAATTTGGGACAAGATGAGG
rs1894668	chr20:41652333	GGTGCTTTTGCACAAGCAGTTCTTTCTGCCGGGAACGCCCTTCCCCAGCCTTTGCCTTAAT	GGTGCTTTTGCACAAGCAGTTCTTTCTGCCCGGAACGCCCTTCCCCAGCCTTTGCCTTAAT
rs385609	chr20:41719304	TGCTGAGAGAAATTAACCTAATAATAGTTGCAAACGGAACACCGGGCATGCAGTGTGAGGG	TGCTGAGAGAAATTAACCTAATAATAGTTGGAAACGGAACACCGGGCATGCAGTGTGAGGG
rs367342	chr20:41719362	GGGGCTGGTCCAGAGCCTCTGACCCACACTGGGAAGTCATGGACCGTTCAGGGGTCGGGGG	GGGGCTGGTCCAGAGCCTCTGACCCACACTTGGAAGTCATGGACCGTTCAGGGGTCGGGGG
rs412396	chr20:41719376	GCCTCTGACCCACACTGGGAAGTCATGGACCGTTCAGGGGTCGGGGGCGACACAATGTCCG	GCCTCTGACCCACACTGGGAAGTCATGGACGGTTCAGGGGTCGGGGGCGACACAATGTCCG
rs396373	chr20:41724981	TGCATCCACTCAATTTAAATGGAATGTGTAGAACCCCTTCCATGAGTACCTACCAGAAGCC	TGCATCCACTCAATTTAAATGGAATGTGTAAAACCCCTTCCATGAGTACCTACCAGAAGCC
rs385345	chr20:41725375	TTTCCCAGCAGAGATAAATTCTGTATGTTACTAGTCCAGAGTCCAGGGACCACTCCCAGGT	TTTCCCAGCAGAGATAAATTCTGTATGTTATTAGTCCAGAGTCCAGGGACCACTCCCAGGT
rs619289	chr20:41728027	GTGGTGGTCTGGAAGATCAGATAAATGTGATTGTGGAGTAAGGAATTTACCCTGAGGGAGA	GTGGTGGTCTGGAAGATCAGATAAATGTGACTGTGGAGTAAGGAATTTACCCTGAGGGAGA
rs11687844	chr2:210190246	ACAGTCTCAGCAGACTAATACACATATCCATGCAATAGTTGTAACACTCTCCTTTATATGG	ACAGTCTCAGCAGACTAATACACATATCCAAGCAATAGTTGTAACACTCTCCTTTATATGG
[truncated: 24,045 more rows]
