# Supplementary material for: In Silico Detection of Sequence Variations Modifying Transcriptional Regulation
Source: PLOS journal article supplement (doi:10.1371/journal.pcbi.0040005), 2008-01-15
Supplement: S5 (10.1371/journal.pcbi.0040005.s005) [file journal.pcbi.0040005.s005]

Mutated_site	Sequence_id	Relative_free_energy	Sequence
HSE	WT	0	AAGGCTGGGGGGCAGGACGGGAGGCGAAACCCCTGGAATATTCCCGACCTGGCAGCCTCATCGAGCTTGGTGATTGG
HSE	92T	0.21	AAGGCTGGGGGGCAGGACGGGAGGCGAAACCCCTGGAATATTCCCGATCTGGCAGCCTCATCGAGCTTGGTGATTGGC
HSE	92G	0.09	AAGGCTGGGGGGCAGGACGGGAGGCGAAACCCCTGGAATATTCCCGAGCTGGCAGCCTCATCGAGCTTGGTGATTGGC
HSE	92A	0.51	AAGGCTGGGGGGCAGGACGGGAGGCGAAACCCCTGGAATATTCCCGAGCTGGCAGCCTCATCGAGCTTGGTGATTGGC
HSE	93T	0	AAGGCTGGGGGGCAGGACGGGAGGCGAAACCCCTGGAATATTCCCGTCCTGGCAGCCTCATCGAGCTTGGTGATTGGC
HSE	93G	0.08	AAGGCTGGGGGGCAGGACGGGAGGCGAAACCCCTGGAATATTCCCGGCCTGGCAGCCTCATCGAGCTTGGTGATTGGC
HSE	93C	-0.06	AAGGCTGGGGGGCAGGACGGGAGGCGAAACCCCTGGAATATTCCCGCCCTGGCAGCCTCATCGAGCTTGGTGATTGGC
HSE	94T	0.03	AAGGCTGGGGGGCAGGACGGGAGGCGAAACCCCTGGAATATTCCCTACCTGGCAGCCTCATCGAGCTTGGTGATTGGC
HSE	94C	0.07	AAGGCTGGGGGGCAGGACGGGAGGCGAAACCCCTGGAATATTCCCCACCTGGCAGCCTCATCGAGCTTGGTGATTGGC
HSE	94A	-0.08	AAGGCTGGGGGGCAGGACGGGAGGCGAAACCCCTGGAATATTCCCAACCTGGCAGCCTCATCGAGCTTGGTGATTGGC
HSE	95T	-0.15	AAGGCTGGGGGGCAGGACGGGAGGCGAAACCCCTGGAATATTCCTGACCTGGCAGCCTCATCGAGCTTGGTGATTGGC
HSE	95G	0	AAGGCTGGGGGGCAGGACGGGAGGCGAAACCCCTGGAATATTCCGGACCTGGCAGCCTCATCGAGCTTGGTGATTGGC
HSE	95A	0.38	AAGGCTGGGGGGCAGGACGGGAGGCGAAACCCCTGGAATATTCCAGACCTGGCAGCCTCATCGAGCTTGGTGATTGGC
HSE	96T	0.62	AAGGCTGGGGGGCAGGACGGGAGGCGAAACCCCTGGAATATTCTCGACCTGGCAGCCTCATCGAGCTTGGTGATTGGC
HSE	96G	0.17	AAGGCTGGGGGGCAGGACGGGAGGCGAAACCCCTGGAATATTCGCGACCTGGCAGCCTCATCGAGCTTGGTGATTGGC
HSE	96A	-0.6	AAGGCTGGGGGGCAGGACGGGAGGCGAAACCCCTGGAATATTCACGACCTGGCAGCCTCATCGAGCTTGGTGATTGGC
HSE	97T	-0.92	AAGGCTGGGGGGCAGGACGGGAGGCGAAACCCCTGGAATATTTCCGACCTGGCAGCCTCATCGAGCTTGGTGATTGGC
HSE	97G	-0.84	AAGGCTGGGGGGCAGGACGGGAGGCGAAACCCCTGGAATATTGCCGACCTGGCAGCCTCATCGAGCTTGGTGATTGGC
HSE	97A	-1.05	AAGGCTGGGGGGCAGGACGGGAGGCGAAACCCCTGGAATATTACCGACCTGGCAGCCTCATCGAGCTTGGTGATTGGC
HSE	98G	-0.86	AAGGCTGGGGGGCAGGACGGGAGGCGAAACCCCTGGAATATGCCCGACCTGGCAGCCTCATCGAGCTTGGTGATTGGC
HSE	98C	-1.08	AAGGCTGGGGGGCAGGACGGGAGGCGAAACCCCTGGAATATGCCCGACCTGGCAGCCTCATCGAGCTTGGTGATTGGC
HSE	98A	-0.8	AAGGCTGGGGGGCAGGACGGGAGGCGAAACCCCTGGAATATACCCGACCTGGCAGCCTCATCGAGCTTGGTGATTGGC
HSE	99G	-0.57	AAGGCTGGGGGGCAGGACGGGAGGCGAAACCCCTGGAATAGTCCCGACCTGGCAGCCTCATCGAGCTTGGTGATTGGC
HSE	99C	-0.60	AAGGCTGGGGGGCAGGACGGGAGGCGAAACCCCTGGAATACTCCCGACCTGGCAGCCTCATCGAGCTTGGTGATTGGC
HSE	99A	-0.56	AAGGCTGGGGGGCAGGACGGGAGGCGAAACCCCTGGAATAATCCCGACCTGGCAGCCTCATCGAGCTTGGTGATTGGC
HSE	100T	-0.09	AAGGCTGGGGGGCAGGACGGGAGGCGAAACCCCTGGAATTTTCCCGACCTGGCAGCCTCATCGAGCTTGGTGATTGGC
HSE	100G	0.31	AAGGCTGGGGGGCAGGACGGGAGGCGAAACCCCTGGAATGTTCCCGACCTGGCAGCCTCATCGAGCTTGGTGATTGGC
HSE	100C	-0.2	AAGGCTGGGGGGCAGGACGGGAGGCGAAACCCCTGGAATCTTCCCGACCTGGCAGCCTCATCGAGCTTGGTGATTGGC
HSE	101G	-0.14	AAGGCTGGGGGGCAGGACGGGAGGCGAAACCCCTGGAAGATTCCCGACCTGGCAGCCTCATCGAGCTTGGTGATTGGC
HSE	101C	0.09	AAGGCTGGGGGGCAGGACGGGAGGCGAAACCCCTGGAACATTCCCGACCTGGCAGCCTCATCGAGCTTGGTGATTGGC
HSE	101A	0.02	AAGGCTGGGGGGCAGGACGGGAGGCGAAACCCCTGGAAAATTCCCGACCTGGCAGCCTCATCGAGCTTGGTGATTGGC
HSE	102T	-0.43	AAGGCTGGGGGGCAGGACGGGAGGCGAAACCCCTGGATTATTCCCGACCTGGCAGCCTCATCGAGCTTGGTGATTGGC
HSE	102G	-0.99	AAGGCTGGGGGGCAGGACGGGAGGCGAAACCCCTGGAGTATTCCCGACCTGGCAGCCTCATCGAGCTTGGTGATTGGC
HSE	102C	-0.81	AAGGCTGGGGGGCAGGACGGGAGGCGAAACCCCTGGACTATTCCCGACCTGGCAGCCTCATCGAGCTTGGTGATTGGC
HSE	103T	-1	AAGGCTGGGGGGCAGGACGGGAGGCGAAACCCCTGGTATATTCCCGACCTGGCAGCCTCATCGAGCTTGGTGATTGGC
HSE	103G	-1.06	AAGGCTGGGGGGCAGGACGGGAGGCGAAACCCCTGGGATATTCCCGACCTGGCAGCCTCATCGAGCTTGGTGATTGGC
HSE	103C	-1.01	AAGGCTGGGGGGCAGGACGGGAGGCGAAACCCCTGGCATATTCCCGACCTGGCAGCCTCATCGAGCTTGGTGATTGGC
HSE	104T	-1.01	AAGGCTGGGGGGCAGGACGGGAGGCGAAACCCCTGTAATATTCCCGACCTGGCAGCCTCATCGAGCTTGGTGATTGGC
HSE	104C	-1.03	AAGGCTGGGGGGCAGGACGGGAGGCGAAACCCCTGCAATATTCCCGACCTGGCAGCCTCATCGAGCTTGGTGATTGGC
HSE	104A	-0.84	AAGGCTGGGGGGCAGGACGGGAGGCGAAACCCCTGAAATATTCCCGACCTGGCAGCCTCATCGAGCTTGGTGATTGGC
HSE	105T	-0.48	AAGGCTGGGGGGCAGGACGGGAGGCGAAACCCCTTGAATATTCCCGACCTGGCAGCCTCATCGAGCTTGGTGATTGGC
HSE	105C	-0.09	AAGGCTGGGGGGCAGGACGGGAGGCGAAACCCCTCGAATATTCCCGACCTGGCAGCCTCATCGAGCTTGGTGATTGGC
HSE	105A	0.16	AAGGCTGGGGGGCAGGACGGGAGGCGAAACCCCTAGAATATTCCCGACCTGGCAGCCTCATCGAGCTTGGTGATTGGC
HSE	106G	-0.21	AAGGCTGGGGGGCAGGACGGGAGGCGAAACCCCGGGAATATTCCCGACCTGGCAGCCTCATCGAGCTTGGTGATTGGC
HSE	106C	-0.22	AAGGCTGGGGGGCAGGACGGGAGGCGAAACCCCCGGAATATTCCCGACCTGGCAGCCTCATCGAGCTTGGTGATTGGC
HSE	106A	-0.11	AAGGCTGGGGGGCAGGACGGGAGGCGAAACCCCAGGAATATTCCCGACCTGGCAGCCTCATCGAGCTTGGTGATTGGC
HSE	107T	0.11	AAGGCTGGGGGGCAGGACGGGAGGCGAAACCCTTGGAATATTCCCGACCTGGCAGCCTCATCGAGCTTGGTGATTGGC
HSE	107G	0.18	AAGGCTGGGGGGCAGGACGGGAGGCGAAACCCGTGGAATATTCCCGACCTGGCAGCCTCATCGAGCTTGGTGATTGGC
HSE	107A	0.24	AAGGCTGGGGGGCAGGACGGGAGGCGAAACCCATGGAATATTCCCGACCTGGCAGCCTCATCGAGCTTGGTGATTGGC
HSE	108T	0.23	AAGGCTGGGGGGCAGGACGGGAGGCGAAACCTCTGGAATATTCCCGACCTGGCAGCCTCATCGAGCTTGGTGATTGGC
HSE	108G	-0.05	AAGGCTGGGGGGCAGGACGGGAGGCGAAACCGCTGGAATATTCCCGACCTGGCAGCCTCATCGAGCTTGGTGATTGGC
HSE	108A	0.17	AAGGCTGGGGGGCAGGACGGGAGGCGAAACCACTGGAATATTCCCGACCTGGCAGCCTCATCGAGCTTGGTGATTGGC
HSE	109T	0.01	AAGGCTGGGGGGCAGGACGGGAGGCGAAACTCCTGGAATATTCCCGACCTGGCAGCCTCATCGAGCTTGGTGATTGGC
HSE	109G	0.1	AAGGCTGGGGGGCAGGACGGGAGGCGAAACGCCTGGAATATTCCCGACCTGGCAGCCTCATCGAGCTTGGTGATTGGC
HSE	109A	0.24	AAGGCTGGGGGGCAGGACGGGAGGCGAAACACCTGGAATATTCCCGACCTGGCAGCCTCATCGAGCTTGGTGATTGGC
Mnt	WTG	0	AGGTCCACGGTGGACCT
Mnt	WTC	0	AGGTCCACCGTGGACCT
Mnt	11A	0.44	AGGTCCACAGTGGACCT
Mnt	11T	0.44	AGGTCCACTGTGGACCT
Mnt	12A	1.1	AGGTCCACGATGGACCT
Mnt	12C	1.5	AGGTCCACGCTGGACCT
Mnt	12T	1.9	AGGTCCACGTTGGACCT
Mnt	13A	1.5	AGGTCCACGGAGGACCT
Mnt	13C	1.2	AGGTCCACGGCGGACCT
Mnt	13G	0.99	AGGTCCACGGGGGACCT
Mnt	14A	0.99	AGGTCCACGGTAGACCT
Mnt	14C	2.6	AGGTCCACGGTCGACCT
Mnt	14T	1.4	AGGTCCACGGTTGACCT
Mnt	15A	0.63	AGGTCCACGGTGAACCT
Mnt	15C	1.3	AGGTCCACGGTGCACCT
Mnt	15T	1.4	AGGTCCACGGTGTACCT
Mnt	16C	0.19	AGGTCCACGGTGGCCCT
Mnt	16G	0.72	AGGTCCACGGTGGGCCT
Mnt	16T	0.40	AGGTCCACGGTGGTCCT
Mnt	17A	1.3	AGGTCCACGGTGGAACT
Mnt	17G	2.0	AGGTCCACGGTGGAGCT
Mnt	17T	1.4	AGGTCCACGGTGGATCT
Mnt	18A	0.48	AGGTCCACGGTGGACAT
Mnt	18G	0.65	AGGTCCACGGTGGACGT
Mnt	18T	0.45	AGGTCCACGGTGGACTT
Mnt	19A	0.55	AGGTCCACGGTGGACCA
Mnt	19C	-0.16	AGGTCCACGGTGGACCC
Mnt	19G	0.61	AGGTCCACGGTGGACCG
